# Supplementary material for: The role of fructose 1,6-bisphosphate-mediated glycolysis/gluconeogenesis genes in cancer prognosis
Source: Aging (Albany NY). 2022 Apr 11;14(7):3233–58. doi: 10.18632/aging.204010 (PMC9037270; doi:10.18632/aging.204010)
Supplement: Supplementary Table 1 [file aging-14-204010-s002.xlsx]

## Sheet: ALDOA correlated molecules
Supplementary Table 1. Genes correlated to ALDOA and FBP1 expression of LUAD in the TCGA (PanCancer Atlas dataset).
Correlated Gene	Cytoband	Spearman's Correlation	p-Value
GAPDH	12p13.31	0.659947	4.4154e-65
PPP4C	16p11.2	0.637553	1.57289e-59
PKM	15q23	0.581422	1.87087e-47
TPI1	12p13.31	0.574141	4.68548e-46
FAM162A	3q21.1	0.568916	4.49846e-45
ENO1	1p36.23	0.564207	3.3377e-44
LDHA	11p15.1	0.545937	5.91484e-41
BOLA2	16p11.2	0.541835	2.97916e-40
GPI	19q13.11	0.535672	3.24404e-39
PGK1	Xq21.1	0.521555	6.42109e-37
NDUFAB1	16p12.2	0.507453	9.92164e-35
MIF	22q11.23	0.50297	4.69133e-34
SPAG4	20q11.22	0.500629	1.04659e-33
PLOD2	3q24	0.496615	4.08194e-33
SLC2A1	1p34.2	0.492089	1.85389e-32
NDUFB4	3q13.33	0.490805	2.83614e-32
MRPL28	16p13.3	0.488696	5.67895e-32
P4HA1	10q22.1	0.482815	3.84033e-31
MRPS34	16p13.3	0.47877	1.40006e-30
ALG3	3q27.1	0.477596	2.03069e-30
MSRB1	16p13.3	0.476537	2.83777e-30
PRELID1	5q35.3	0.476531	2.84267e-30
RAB5IF	20q11.23	0.472094	1.13968e-29
SLC16A3	17q25.3	0.469068	2.90491e-29
C16ORF91	16p13.3	0.468529	3.42852e-29
INO80E	16p11.2	0.467704	4.41458e-29
PGAM1	10q24.1	0.464822	1.06269e-28
ELOB	16p13.3	0.462536	2.12026e-28
TK1	17q25.3	0.462407	2.20405e-28
HSD3B7	16p11.2	0.461165	3.20039e-28
MRPL17	11p15.4	0.460208	4.26166e-28
TBC1D10B	16p11.2	0.458411	7.27903e-28
POP7	7q22.1	0.45086	6.66562e-27
DNAJA3	16p13.3	0.450025	8.48684e-27
ERO1A	14q22.1	0.448628	1.2695e-26
ANGPTL4	19p13.2	0.447999	1.52083e-26
MRPL52	14q11.2	0.446621	2.25634e-26
PSMB3	17q12	0.445033	3.54717e-26
NDUFB10	16p13.3	0.444626	3.98146e-26
CCDC58	3q21.1	0.44433	4.3295e-26
COPS6	7q22.1	0.443897	4.89501e-26
BCKDK	16p11.2	0.440422	1.30148e-25
PFKP	10p15.2	0.440288	1.35108e-25
MDH2	7q11.23	0.43828	2.36522e-25
DCTPP1	16p11.2	0.437102	3.27878e-25
RPL26L1	5q35.1	0.436953	3.4164e-25
TUFM	16p11.2	0.436087	4.33954e-25
F12	5q35.3	0.436063	4.36789e-25
EBNA1BP2	1p34.2	0.4356	4.9635e-25
FADD	11q13.3	0.435443	5.18159e-25
HSPB1P1	9q21.13	0.434496	6.72206e-25
PAM16	16p13.3	0.433242	9.47711e-25
TUBA4A	2q35	0.433016	1.00795e-24
DTYMK	2q37.3	0.432716	1.09376e-24
PMM2	16p13.2	0.432623	1.12185e-24
DIABLO	12q24.31	0.432489	1.16366e-24
EMC9	14q12	0.4313	1.6079e-24
GADD45GIP1	19p13.13	0.431152	1.6739e-24
ECE2	3q27.1	0.430782	1.8504e-24
PPP1R3G	6p25.1	0.430748	1.8676e-24
RNASEH2A	19p13.13	0.430326	2.09374e-24
PSMB2	1p34.3	0.430211	2.16021e-24
TUBA1C	12q13.12	0.429871	2.36801e-24
MTX1	1q22	0.429758	2.44145e-24
AK4	1p31.3	0.42973	2.45947e-24
NOP16	5q35.2	0.428839	3.1277e-24
MRPL12	17q25.3	0.428685	3.26002e-24
PKMYT1	16p13.3	0.427868	4.06039e-24
MTFP1	22q12.2	0.427238	4.80777e-24
CHCHD2	7p11.2	0.426863	5.31442e-24
MRPL22	5q33.2	0.426016	6.66364e-24
MRPS24	7p13	0.424905	8.95878e-24
CARHSP1	16p13.2	0.423933	1.15919e-23
TFG	3q12.2	0.422979	1.49187e-23
HSPB1	7q11.23	0.422642	1.63061e-23
KIF22	16p11.2	0.418573	4.73418e-23
C19ORF53	19p13.13	0.41765	6.01686e-23
PLK1	16p12.2	0.417357	6.49123e-23
AURKAIP1	1p36.33	0.416597	7.90062e-23
C1ORF122	1p34.3	0.415686	9.99614e-23
EGLN3	14q13.1	0.415679	1.00141e-22
NSMCE1	16p12.1	0.415652	1.00825e-22
ATG101	12q13.13	0.415416	1.0716e-22
SFXN1	5q35.2	0.41507	1.17139e-22
PGP	16p13.3	0.414629	1.31161e-22
BUD31	7q22.1	0.414584	1.32716e-22
SSBP1	7q34	0.414041	1.5251e-22
DDX41	5q35.3	0.412964	2.0089e-22
EBP	Xp11.23	0.412622	2.19239e-22
PPP1R14B	11q13.1	0.41159	2.85041e-22
ATP5MF	7q22.1	0.411429	2.96952e-22
NDUFS8	11q13.2	0.410656	3.61271e-22
PDZD11	Xq13.1	0.409794	4.49342e-22
RARS	5q34	0.409293	5.0994e-22
MRPL37	1p32.3	0.408657	5.98529e-22
POLR2J	7q22.1	0.407046	8.96522e-22
POLD2	7p13	0.406532	1.01959e-21
RAD23A	19p13.13	0.405908	1.19128e-21
FAM207A	21q22.3	0.405712	1.25093e-21
RFC2	7q11.23	0.405485	1.32366e-21
UBE2I	16p13.3	0.404912	1.52659e-21
APRT	16q24.3	0.404704	1.60737e-21
NABP2	12q13.3	0.404683	1.61591e-21
PPIA	7p13	0.404642	1.63243e-21
HILPDA	7q32.1	0.404467	1.70479e-21
SRPRB	3q22.1	0.402995	2.45406e-21
CYTOR	2p11.2	0.40191	3.20596e-21
SEC61G	7p11.2	0.401662	3.40753e-21
ZNHIT1	7q22.1	0.401182	3.83358e-21
PSMB5	14q11.2	0.400192	4.88519e-21
MRPL21	11q13.3	0.400075	5.02767e-21
H2AFZ	4q23	0.400074	5.029e-21
EIF5A	17p13.1	0.39971	5.49567e-21
YIF1A	11q13.2	0.399467	5.83175e-21
CDK5	7q36.1	0.399413	5.9088e-21
LCMT1	16p12.1	0.399375	5.96499e-21
PA2G4	12q13.2	0.399221	6.1923e-21
MRPS12	19q13.2	0.399177	6.25983e-21
POLR2H	3q27.1	0.398909	6.68227e-21
COX17	3q13.33	0.398559	7.27558e-21
BLOC1S4	4p16.1	0.398254	7.83596e-21
NEIL3	4q34.3	0.398072	8.1888e-21
TRAP1	16p13.3	0.39744	9.54645e-21
EMC8	16q24.1	0.397382	9.68084e-21
METTL5	2q31.1	0.3969	1.08772e-20
MLST8	16p13.3	0.396475	1.20533e-20
PSMD9	12q24.31	0.396247	1.27361e-20
UBE2T	1q32.1	0.396086	1.32416e-20
NME4	16p13.3	0.39586	1.39807e-20
SLAMF9	1q23.2	0.395837	1.40599e-20
NHP2	5q35.3	0.395311	1.59561e-20
NSUN5	7q11.23	0.395149	1.65912e-20
MRTO4	1p36.13	0.394154	2.10655e-20
EIF4EBP1	8p11.23	0.393839	2.27125e-20
MCRIP2	16p13.3	0.393742	2.32477e-20
CDC20	1p34.2	0.393202	2.64511e-20
CCNB1	5q13.2	0.392698	2.9828e-20
TIMM17B	Xp11.23	0.392248	3.32068e-20
COX8A	11q13.1	0.391802	3.69209e-20
DAD1	14q11.2	0.391682	3.79841e-20
GMPPA	2q35	0.391008	4.45765e-20
MRPL53	2p13.1	0.390938	4.53235e-20
ARPC1A	7q22.1	0.390581	4.93166e-20
TUBA1B	12q13.12	0.389971	5.69658e-20
PCGF1	2p13.1	0.389928	5.75437e-20
CD2BP2	16p11.2	0.389646	6.15076e-20
YWHAG	7q11.23	0.389587	6.23761e-20
CDT1	16q24.3	0.38931	6.6571e-20
ZFPL1	11q13.1	0.389036	7.10094e-20
PAGR1	16p11.2	0.388933	7.27492e-20
B3GNT4	12q24.31	0.388581	7.90436e-20
EFNA3	1q21.3	0.388312	8.4199e-20
LOC388955	2p15	0.38821	8.62402e-20
BUD23	7q11.23	0.388095	8.85828e-20
SNRPA1	15q26.3	0.387417	1.0384e-19
ZP3	7q11.23	0.387276	1.07319e-19
SPP1	4q22.1	0.387206	1.0911e-19
NUBP2	16p13.3	0.386806	1.19803e-19
C19ORF24	19p13.3	0.386751	1.21344e-19
HMMR	5q34	0.38655	1.27183e-19
SLC25A39	17q21.31	0.386276	1.3558e-19
CTU2	16q24.3	0.385906	1.47779e-19
TACO1	17q23.3	0.385269	1.71397e-19
COX6A1	12q24.31|12q24.2	0.385135	1.76795e-19
PSMA5	1p13.3	0.384367	2.11285e-19
GRPEL1	4p16.1	0.383232	2.74661e-19
ROMO1	20q11.22	0.383075	2.84811e-19
EIF3I	1p35.2	0.382994	2.90151e-19
FKBP4	12p13.33	0.382964	2.9217e-19
DARS	2q21.3	0.382196	3.48724e-19
PHB	17q21.33	0.382071	3.58827e-19
NME1	17q21.33	0.381949	3.69074e-19
GFER	16p13.3	0.381913	3.72134e-19
KCTD5	16p13.3	0.381769	3.84596e-19
PSMB4	1q21.3	0.380967	4.62264e-19
ZNRD2	11q13.1	0.380605	5.02159e-19
NDUFS6	5p15.33	0.380564	5.06903e-19
CYC1	8q24.3	0.380435	5.22071e-19
DRAP1	11q13.1	0.380419	5.24029e-19
TBRG4	7p13	0.380303	5.38111e-19
CDCA3	12p13.31	0.380054	5.69554e-19
UBC	12q24.31	0.379953	5.82887e-19
G6PD	Xq28	0.379736	6.12419e-19
NOL3	16q22.1	0.379701	6.17327e-19
H2AFX	11q23.3	0.379333	6.71268e-19
ASF1B	19p13.12	0.379257	6.83051e-19
SEM1	7q21.3	0.378439	8.22594e-19
TEDC2	16p13.3	0.378074	8.9357e-19
NAA10	Xq28	0.37792	9.25354e-19
LAGE3	Xq28	0.377886	9.32359e-19
ANAPC11	17q25.3	0.377661	9.81205e-19
IGFBP3	7p12.3	0.377011	1.13642e-18
ZNF768	16p11.2	0.376799	1.19232e-18
LSM4	19p13.11	0.376493	1.27734e-18
HSPE1	2q33.1	0.376305	1.33256e-18
METTL26	16p13.3	0.376293	1.33634e-18
UQCRQ	5q31.1	0.376028	1.41841e-18
ATP5MC3	2q31.1	0.376019	1.42122e-18
CENPN	16q23.2	0.375891	1.46287e-18
PTTG1	5q33.3	0.375728	1.51737e-18
TMEM208	16q22.1	0.375682	1.53328e-18
NUDT1	7p22.3	0.37553	1.58651e-18
ARPC3	12q24.11	0.375505	1.59561e-18
CDKN3	14q22.2	0.375089	1.75165e-18
MRPL36	5p15.33	0.374821	1.85995e-18
RPUSD1	16p13.3	0.374765	1.88354e-18
GINS2	16q24.1	0.374727	1.89963e-18
TIMMDC1	3q13.33	0.374681	1.91933e-18
VDAC1	5q31.1	0.374614	1.9483e-18
RAN	12q24.33	0.374005	2.23296e-18
CKS1B	1q21.3	0.373857	2.30787e-18
FTSJ1	Xp11.23	0.373699	2.39092e-18
COX7B	Xq21.1	0.373668	2.40752e-18
EIF5AL1	10q22.3	0.373608	2.43989e-18
NIT2	3q12.2	0.373303	2.61178e-18
KNOP1	16p12.3	0.372909	2.85133e-18
RNPS1	16p13.3	0.372869	2.87694e-18
TACC3	4p16.3	0.372829	2.90249e-18
PSMD14	2q24.2	0.372824	2.9057e-18
RNF7	3q23	0.372809	2.91569e-18
NDRG1	8q24.22	0.371965	3.51696e-18
SEC13	3p25.3	0.371586	3.82522e-18
SNRNP25	16p13.3	0.3714	3.98622e-18
CKS2	9q22.2	0.371242	4.12843e-18
CIB1	15q26.1	0.37115	4.21268e-18
SQSTM1	5q35.3	0.370971	4.38286e-18
TMSB10	2p11.2	0.370387	4.98702e-18
COX5B	2q11.2	0.370241	5.15005e-18
MAZ	16p11.2	0.370073	5.34516e-18
MRPL51	12p13.31	0.370042	5.38088e-18
MRPS11	15q25.3	0.369892	5.56271e-18
MRPS22	3q23	0.369869	5.59038e-18
TREML3P	6p21.1	0.369603	5.92798e-18
MRPL11	11q13.2	0.368895	6.92578e-18
TOMM40	19q13.32	0.368411	7.70178e-18
SRM	1p36.22	0.36807	8.29943e-18
MC1R	16q24.3	0.368039	8.3561e-18
RPA3	7p21.3	0.367868	8.67336e-18
BOLA3	2p13.1	0.367306	9.80678e-18
TSFM	12q14.1	0.367285	9.8535e-18
STUB1	16p13.3	0.366705	1.11816e-17
MIR4435-2HG	2q13	0.36667	1.12666e-17
NTMT1	9q34.11	0.366612	1.14096e-17
AP2S1	19q13.32	0.366548	1.15713e-17
JMJD4	1q42.13	0.366149	1.26204e-17
GUK1	1q42.13	0.366011	1.30042e-17
BANF1	11q13.1	0.365902	1.33167e-17
NOC4L	12q24.33	0.365842	1.34897e-17
DUSP13	10q22.2	0.365675	1.39895e-17
EIPR1	2p25.3	0.365658	1.40413e-17
METTL1	12q14.1	0.36544	1.47193e-17
PSMD7	16q23.1	0.365407	1.48278e-17
RPN1	3q21.3	0.365064	1.59693e-17
BCL7C	16p11.2	0.36497	1.62995e-17
HPRT1	Xq26.2-q26.3	0.364933	1.64302e-17
CMC2	16q23.2	0.364882	1.66118e-17
MYL6B	12q13.2	0.364597	1.76694e-17
IMP4	2q21.1	0.364009	2.00639e-17
GEMIN6	2p22.1	0.363839	2.08121e-17
TMEM219	16p11.2	0.363826	2.08694e-17
PAICS	4q12	0.363619	2.18239e-17
ZNF668	16p11.2	0.363589	2.19648e-17
MYBL2	20q13.12	0.363449	2.26403e-17
EXOSC4	8q24.3	0.363423	2.27629e-17
HNRNPC	14q11.2	0.363285	2.34508e-17
ZNF593	1p36.11	0.363274	2.35068e-17
GNB2	7q22.1	0.363014	2.48623e-17
STYXL1	7q11.23	0.362836	2.58304e-17
SUV39H1	Xp11.23	0.362777	2.61593e-17
PDCD6	5p15.33	0.362688	2.66656e-17
PSMC3	11p11.2	0.362505	2.77358e-17
PYCR3	8q24.3	0.362495	2.77922e-17
TSR3	16p13.3	0.362408	2.83174e-17
NUP37	12q23.2	0.3624	2.83664e-17
ERI3	1p34.1	0.362283	2.90875e-17
HSD17B10	Xp11.22	0.36212	3.01193e-17
PRR7	5q35.3	0.362107	3.02041e-17
ATP6V0C	16p13.3	0.361875	3.17441e-17
RITA1	12q24.13	0.361874	3.17502e-17
UBE2S	19q13.42	0.361804	3.2235e-17
MXD3	5q35.3	0.361436	3.48762e-17
SEMA4B	15q26.1	0.361359	3.54493e-17
ABCF3	3q27.1	0.361294	3.59513e-17
NUTF2	16q22.1	0.361177	3.68561e-17
KCTD13	16p11.2	0.361049	3.78842e-17
FARSA	19p13.13	0.360601	4.16803e-17
ADRM1	20q13.33	0.360429	4.32375e-17
RUVBL2	19q13.33	0.360299	4.44503e-17
RRM2	2p25.1	0.360205	4.53535e-17
CDCA4	14q32.33	0.359394	5.38885e-17
ATP5PD	17q25.1	0.359323	5.4703e-17
NMRAL1	16p13.3	0.359256	5.54902e-17
THOC6	16p13.3	0.358789	6.12657e-17
PPIH	1p34.2	0.358759	6.1658e-17
KARS	16q23.1	0.358714	6.22469e-17
THOC3	5q35.2	0.358565	6.42412e-17
COPE	19p13.11	0.358462	6.56635e-17
CCT7	2p13.2	0.358414	6.63326e-17
MRPL3	3q22.1	0.358314	6.77478e-17
SLIRP	14q24.3	0.357723	7.67661e-17
UQCC3	11q12.3	0.356851	9.22551e-17
PSMC2	7q22.1	0.356781	9.36191e-17
ORMDL2	12q13.2	0.356724	9.47572e-17
POLD4	11q13.2	0.35639	1.01635e-16
CENPW	6q22.32	0.356222	1.05297e-16
TRPT1	11q13.1	0.356174	1.06366e-16
STX4	16p11.2	0.355799	1.15073e-16
ORC6	16q11.2	0.35561	1.19716e-16
NUDCD2	5q34	0.355508	1.2229e-16
ALYREF	17q25.3	0.355265	1.28685e-16
HNRNPAB	5q35.3	0.355114	1.32802e-16
ZFAND2A	7p22.3	0.354884	1.39362e-16
CCT5	5p15.2	0.354771	1.42675e-16
RNF181	2p11.2	0.354157	1.62207e-16
SNRPG	2p13.3	0.35415	1.62438e-16
LRRC42	1p32.3	0.354052	1.65783e-16
PFDN2	1q23.3	0.353976	1.6841e-16
PDAP1	7q22.1	0.353846	1.73054e-16
RPF2	6q21	0.35358	1.82913e-16
TBL2	7q11.23	0.353533	1.84694e-16
COPZ1	12q13.13	0.352786	2.15699e-16
KCMF1	2p11.2	0.352672	2.20845e-16
MTFR2	6q23.3	0.352657	2.21563e-16
BRI3BP	12q24.31	0.352262	2.40419e-16
SLC25A10	17q25.3	0.352204	2.43343e-16
VKORC1	16p11.2	0.351926	2.57734e-16
CINP	14q32.31	0.351635	2.73757e-16
MZT2B	2q21.1	0.351602	2.7561e-16
P4HB	17q25.3	0.351493	2.81901e-16
RAD51	15q15.1	0.351139	3.03221e-16
MRPL58	17q25.1	0.351117	3.04619e-16
COPG1	3q21.3	0.350939	3.1598e-16
CDC25C	5q31.2	0.350698	3.32096e-16
CFL1	11q13.1	0.350208	3.67349e-16
FAM71D	14q23.3	0.350037	3.80431e-16
SF3B5	6q24.2	0.349338	4.39111e-16
CHMP1A	16q24.3	0.348644	5.06162e-16
BIRC5	17q25.3	0.348529	5.18129e-16
MRPS17	7p11.2	0.348465	5.24962e-16
MRPL47	3q26.33	0.348398	5.32203e-16
FTH1	11q12.3	0.348369	5.35394e-16
MRPS15	1p34.3	0.348346	5.37865e-16
C12ORF45	12q23.3	0.347971	5.80716e-16
SAC3D1	11q13.1	0.347935	5.84984e-16
TUBG1	17q21.2	0.347683	6.15735e-16
PTGES3	12q13.3|12	0.347672	6.17166e-16
MFSD5	12q13.13	0.347478	6.41968e-16
GSS	20q11.22	0.347462	6.44171e-16
SNRPF	12q23.1	0.347207	6.78473e-16
CENPM	22q13.2	0.347164	6.84439e-16
MLF2	12p13.31	0.347088	6.94973e-16
CIAO2B	16q22.1	0.347067	6.98066e-16
FOPNL	16p13.11	0.347041	7.01739e-16
PFKFB4	3p21.31	0.346902	7.21815e-16
ECI1	16p13.3	0.346837	7.31318e-16
MZT2A	2q21.1	0.34654	7.76838e-16
TRAF7	16p13.3	0.346399	7.99358e-16
SLC50A1	1q22	0.346349	8.07492e-16
GINS3	16q21	0.346338	8.09286e-16
UBL4A	Xq28	0.345864	8.90904e-16
TRAPPC5	19p13.2	0.345452	9.6836e-16
SRSF9	12q24.31	0.345434	9.71764e-16
TAF10	11p15.4	0.345362	9.86005e-16
PLEK2	14q23.3-q24.1	0.34535	9.88513e-16
LOXL2	8p21.3	0.344678	1.13198e-15
UQCRC1	3p21.31	0.34448	1.17798e-15
TROAP	12q13.12	0.344435	1.18869e-15
NDUFA11	19p13.3	0.344402	1.19673e-15
MRPL55	1q42.13	0.344322	1.21604e-15
DNTTIP1	20q13.12	0.344157	1.25725e-15
ATP6V1F	7q32.1	0.343884	1.32805e-15
POLR3K	16p13.3	0.343624	1.39913e-15
C15ORF48	15q21.1	0.343579	1.41186e-15
AP1S1	7q22.1	0.343405	1.46204e-15
ADM	11p15.4	0.343391	1.46628e-15
HCFC1R1	16p13.3	0.34317	1.53278e-15
APEX2	Xp11.21	0.342259	1.839e-15
ATXN2L	16p11.2	0.342214	1.85557e-15
DDX39A	19p13.12	0.342155	1.87788e-15
COA4	11q13.4	0.341856	1.99324e-15
UBE2C	20q13.12	0.341833	2.00227e-15
PSMG3	7p22.3	0.34165	2.07659e-15
PSMD2	3q27.1	0.341644	2.07914e-15
PYGL	14q22.1	0.341532	2.1261e-15
CYCS	7p15.3	0.34142	2.1743e-15
CCNB2	15q22.2	0.341378	2.19261e-15
MND1	4q31.3	0.341327	2.21486e-15
RFC4	3q27.3	0.341301	2.22616e-15
CENPH	5q13.2	0.340951	2.38708e-15
MPG	16p13.3	0.340879	2.42131e-15
KIAA2013	1p36.22	0.340718	2.49992e-15
TSKU	11q13.5	0.340527	2.59654e-15
SEC61A1	3q21.3	0.340369	2.67943e-15
HAX1	1q21.3	0.340096	2.82843e-15
ATOX1	5q33.1	0.339428	3.22833e-15
C12ORF10	12q13.13	0.339324	3.29553e-15
TMED9	5q35.3	0.338675	3.74576e-15
NUDT22	11q13.1	0.338556	3.83451e-15
PSMB1	6q27	0.33852	3.86204e-15
OIP5	15q15.1	0.338479	3.89313e-15
NDUFB7	19p13.12	0.338474	3.89716e-15
RHOC	1p13.2	0.338442	3.92231e-15
CCT4	2p15	0.338383	3.96802e-15
MRPL24	1q23.1	0.338326	4.01288e-15
PSMD3	17q21.1	0.338244	4.07781e-15
ACTG1	17q25.3	0.338209	4.10623e-15
NME2	17q21.33	0.338142	4.1607e-15
COX6B1	19q13.12	0.338073	4.21726e-15
DGUOK	2p13.1	0.338054	4.23302e-15
SHCBP1	16q11.2	0.338015	4.26569e-15
PREB	2p23.3	0.337953	4.31823e-15
HMBS	11q23.3	0.337918	4.34807e-15
B3GAT3	11q12.3	0.336695	5.52775e-15
UBE2M	19q13.43	0.336497	5.74563e-15
LONP1	19p13.3	0.336103	6.20637e-15
RCC1L	7q11.23	0.335961	6.38072e-15
NDUFA12	12q22	0.335939	6.40789e-15
PSMD4	1q21.3	0.335626	6.81184e-15
UBE2F	2q37.3	0.335421	7.08895e-15
POC1A	3p21.2	0.335349	7.18912e-15
PSMC1	14q32.11	0.334973	7.73563e-15
PQBP1	Xp11.23	0.334814	7.97824e-15
TXN	9q31.3	0.334501	8.478e-15
TXNRD1	12q23.3	0.334434	8.58895e-15
SEC61B	9q22.33	0.334332	8.76156e-15
CMSS1	3q12.1	0.334049	9.25601e-15
SYNGR4	19q13.33	0.33399	9.36267e-15
PPM1G	2p23.3	0.333681	9.94015e-15
EIF4H	7q11.23	0.333238	1.08307e-14
CDC34	19p13.3	0.333195	1.09191e-14
RANBP1	22q11.21	0.333186	1.09387e-14
EIF2B1	12q24.31	0.333001	1.13363e-14
ARPC1B	7q22.1	0.33288	1.16047e-14
KIF2C	1p34.1	0.332845	1.16848e-14
CCDC86	11q12.2	0.332469	1.25638e-14
CBX4	17q25.3	0.332372	1.28002e-14
TARBP2	12q13.13	0.332143	1.33765e-14
TRAIP	3p21.31	0.332031	1.367e-14
PCLAF	15q22.31	0.331852	1.41469e-14
MRPS30	5p12	0.331792	1.43128e-14
PPIAL4C	1q21.2	0.331763	1.43914e-14
RDM1	17q12	0.331668	1.46588e-14
MAD2L2	1p36.22	0.331666	1.46646e-14
PPP1R35	7q22.1	0.331615	1.48062e-14
EMG1	12p13.31	0.331364	1.5538e-14
DECR2	16p13.3	0.330988	1.67027e-14
NOC2L	1p36.33	0.330905	1.69696e-14
MRPL2	6p21.1	0.330905	1.69702e-14
CISD2	4q24	0.330876	1.70655e-14
AIMP2	7p22.1	0.330673	1.77412e-14
SNRPC	6p21.31	0.330653	1.78104e-14
EIF6	20q11.22	0.330451	1.85102e-14
RPP25	15q24.2	0.330395	1.87121e-14
AP2M1	3q27.1	0.330255	1.92171e-14
SPC25	2q24.3	0.330206	1.93981e-14
ATP5MPL	14q32.33	0.330174	1.95196e-14
TBL3	16p13.3	0.330136	1.96626e-14
PSMC4	19q13.2	0.330098	1.98035e-14
FAM72D	1q21.1	0.329822	2.08774e-14
YIPF2	19p13.2	0.32973	2.12473e-14
COASY	17q21.2	0.329685	2.14285e-14
GLRX2	1q31.2	0.329198	2.35151e-14
BRMS1	11q13.2	0.329158	2.36957e-14
MRPL18	6q25.3	0.329101	2.39518e-14
SKA3	13q12.11	0.328914	2.48202e-14
PPP1CA	11q13.2	0.328787	2.54276e-14
KIF20A	5q31.2	0.328513	2.67855e-14
ARF5	7q32.1	0.328458	2.7068e-14
PUSL1	1p36.33	0.327987	2.95979e-14
SDHB	1p36.13	0.327984	2.96147e-14
CCNQ	Xq28	0.327973	2.96777e-14
SFN	1p36.11	0.327878	3.02196e-14
SHMT2	12q13.3	0.32754	3.2219e-14
PRICKLE3	Xp11.23	0.327295	3.37458e-14
HTATIP2	11p15.1	0.327098	3.50236e-14
TIMM8A	Xq22.1	0.327045	3.53799e-14
LYAR	4p16.3	0.326816	3.69407e-14
GALE	1p36.11	0.326526	3.90226e-14
DDX56	7p13	0.326326	4.05242e-14
TRMT112	11q13.1	0.32632	4.05657e-14
FAM72B	1p11.2	0.326269	4.09584e-14
MORF4L2	Xq22.2	0.326253	4.10857e-14
SDSL	12q24.13	0.32621	4.14161e-14
POMP	13q12.3	0.326208	4.1431e-14
CCT3	1q22	0.326171	4.17196e-14
MAD2L1	4q27	0.32577	4.49976e-14
FAHD1	16p13.3	0.325628	4.6214e-14
SPDL1	5q35.1	0.325471	4.75976e-14
STC1	8p21.2	0.324811	5.38748e-14
E2F4	16q22.1	0.324783	5.4159e-14
TTC4	1p32.3	0.324762	5.43675e-14
ATP5ME	4p16.3	0.324739	5.46013e-14
PSMB6	17p13.2	0.324662	5.54015e-14
CDC45	22q11.21	0.324184	6.05781e-14
TALDO1	11p15.5	0.32404	6.22301e-14
CSTB	21q22.3	0.324004	6.26546e-14
LRP8	1p32.3	0.323885	6.40682e-14
RNF187	1q42.13	0.323689	6.64479e-14
DCTN2	12q13.3	0.323526	6.85037e-14
PLP2	Xp11.23	0.323485	6.90345e-14
ELOC	8q21.11	0.323441	6.96024e-14
WDR53	3q29	0.323077	7.44854e-14
MRGBP	20q13.33	0.32306	7.47136e-14
TEDC1	14q32.33	0.322996	7.56196e-14
PTPRN	2q35	0.322968	7.60135e-14
NDUFA8	9q33.2	0.322474	8.33184e-14
NCAPG	4p15.31	0.322469	8.34045e-14
PRC1	15q26.1	0.32237	8.49445e-14
PARK7	1p36.23	0.322361	8.50908e-14
TMEM53	1p34.1	0.32236	8.51159e-14
CCDC124	19p13.11	0.32235	8.52662e-14
CENPA	2p23.3	0.321962	9.16391e-14
EXO1	1q43	0.321928	9.22089e-14
PRDX1	1p34.1	0.321886	9.2938e-14
TIMM44	19p13.2	0.321712	9.59821e-14
UTP11	1p34.3	0.321521	9.94414e-14
BSG	19p13.3	0.321442	1.00898e-13
NDUFC1	4q31.1	0.321403	1.01635e-13
CCNA2	4q27	0.321384	1.01985e-13
SNRPA	19q13.2	0.321324	1.03138e-13
PFDN6	6p21.32	0.321296	1.03659e-13
NCBP2AS2	3q29	0.32116	1.06297e-13
ZNF622	5p15.1	0.321153	1.06451e-13
UMPS	3q21.2	0.321109	1.07323e-13
SH3GL1	19p13.3	0.321044	1.08607e-13
CDK16	Xp11.3	0.320981	1.0988e-13
PGAM5	12q24.33	0.320935	1.1082e-13
NOB1	16q22.1	0.320862	1.12323e-13
ARL6IP1	16p12.3	0.320816	1.13277e-13
AVEN	15q14	0.320662	1.16559e-13
OSGIN1	16q23.3	0.320209	1.26701e-13
IDH3G	Xq28	0.320024	1.31095e-13
CHCHD3	7q32.3-q33	0.320009	1.31464e-13
TPI1P3	6q22.1	0.319819	1.36152e-13
CARD19	9q22.31	0.31979	1.36863e-13
CDCA8	1p34.3	0.31964	1.40707e-13
ZDHHC12	9q34.11	0.319629	1.40974e-13
LOC388242	16p11.2	0.319447	1.45775e-13
BRIX1	5p13.2	0.319202	1.52481e-13
PPME1	11q13.4	0.318993	1.58457e-13
PTRH2	17q23.1	0.318936	1.60113e-13
RRP1	21q22.3	0.318752	1.65607e-13
TMEM223	11q12.3	0.318712	1.66817e-13
AGTRAP	1p36.22	0.318543	1.72079e-13
PSME2	14q12	0.318416	1.76124e-13
PSMB7	9q33.3	0.318367	1.7772e-13
TMEM186	16p13.2	0.318357	1.78015e-13
NEDD8	14q12	0.318199	1.83252e-13
WDR74	11q12.3	0.318033	1.88897e-13
NUDC	1p36.11	0.317993	1.90286e-13
DYNLL1	12q24.31	0.31797	1.91082e-13
SRA1	5q31.3	0.317608	2.04127e-13
FBXO22-AS1	15q24.2	0.317555	2.06112e-13
SLC52A2	8q24.3	0.317447	2.10234e-13
B4GALT7	5q35.3	0.317276	2.16876e-13
COX4I1	16q24.1	0.316833	2.3512e-13
FLAD1	1q21.3	0.316301	2.58984e-13
BCL7B	7q11.23	0.316041	2.71476e-13
AHSA1	14q24.3	0.31599	2.73998e-13
H2AFJ	12p12.3	0.315944	2.76303e-13
BCAN	1q23.1	0.315926	2.77227e-13
B4GALNT1	12q13.3	0.315831	2.82035e-13
MRPL13	8q24.12	0.31566	2.9092e-13
ARL6IP4	12q24.31	0.315605	2.93838e-13
BZW1	2q33.1	0.315595	2.94363e-13
PSMA2	7p14.1	0.315583	2.94986e-13
RCCD1	15q26.1	0.315489	3.00054e-13
VDAC2	10q22.2	0.315269	3.12264e-13
USP5	12p13.31	0.315195	3.16471e-13
SMUG1	12q13.13	0.315186	3.16951e-13
ETFB	19q13.41	0.315178	3.17438e-13
STOML2	9p13.3	0.315122	3.20657e-13
YDJC	22q11.21	0.314714	3.45179e-13
NDUFA9	12p13.32	0.314578	3.53744e-13
THOP1	19p13.3	0.314529	3.56884e-13
HJURP	2q37.1	0.314507	3.58308e-13
VPS33A	12q24.31	0.314278	3.73391e-13
PPIAL4G	1q21.2	0.314238	3.76145e-13
TIGD5	8q24.3	0.314077	3.87179e-13
SNF8	17q21.32	0.314064	3.88125e-13
CDC6	17q21.2	0.314059	3.8848e-13
PUS1	12q24.33	0.313984	3.93761e-13
NPM1	5q35.1	0.313973	3.94501e-13
RAD54L	1p34.1	0.313422	4.35639e-13
HSPD1	2q33.1	0.313382	4.38715e-13
AURKB	17p13.1	0.313273	4.47388e-13
AUNIP	1p36.11	0.312884	4.79755e-13
STAMBP	2p13.1	0.312783	4.88508e-13
MYDGF	19p13.3	0.312723	4.93763e-13
CHCHD10	22q11.23	0.312627	5.02374e-13
TNFRSF12A	16p13.3	0.312617	5.03287e-13
BNIP1	5q35.1	0.312499	5.14005e-13
POLDIP2	17q11.2	0.312266	5.35934e-13
PSMA6	14q13.2	0.312189	5.43319e-13
SIRT6	19p13.3	0.312159	5.46209e-13
NDUFC2	11q14.1	0.312043	5.57641e-13
DDX49	19p13.11	0.311971	5.64945e-13
CDK1	10q21.2	0.311959	5.66114e-13
RUVBL1	3q21.3	0.311921	5.70016e-13
S100A11	1q21.3	0.311815	5.80844e-13
SRXN1	20p13	0.311811	5.81296e-13
NDUFB3	2q33.1	0.311802	5.82245e-13
POLA2	11q13.1	0.311582	6.05483e-13
PLIN3	19p13.3	0.311423	6.22932e-13
GSTZ1	14q24.3	0.311414	6.23988e-13
ATP5MC2	12q13.13	0.311395	6.26084e-13
SCNM1	1q21.3	0.311345	6.31682e-13
YKT6	7p13	0.311066	6.63816e-13
HGS	17q25.3	0.311009	6.70617e-13
C5ORF46	5q32	0.310827	6.9273e-13
MCRS1	12q13.12	0.31062	7.18674e-13
EME1	17q21.33	0.31053	7.30203e-13
PSENEN	19q13.12	0.310508	7.33191e-13
FGF11	17p13.1	0.310406	7.46554e-13
SLC3A2	11q12.3	0.310159	7.79979e-13
MCM2	3q21.3	0.310063	7.93406e-13
COQ9	16q21	0.310004	8.01672e-13
TUBB3	16q24.3	0.309775	8.34917e-13
PANX2	22q13.33	0.309754	8.38068e-13
PSMA7	20q13.33	0.309557	8.67749e-13
ARF1	1q42.13	0.309382	8.95151e-13
PIMREG	17p13.2	0.309367	8.97541e-13
ZC3HC1	7q32.2	0.309251	9.16068e-13
SIGMAR1	9p13.3	0.309171	9.29126e-13
RNF40	16p11.2	0.309125	9.36809e-13
HEBP2	6q24.1	0.309027	9.53047e-13
TIMM10	11q12.1	0.308966	9.63383e-13
PGAM4	Xq21.1	0.308966	9.63491e-13
GBAP1	1q22	0.30892	9.71296e-13
C19ORF48	19q13.33	0.308913	9.72529e-13
DDOST	1p36.12	0.308898	9.75136e-13
RNF126	19p13.3	0.308872	9.79491e-13
PNP	14q11.2	0.308792	9.93445e-13
C17ORF58	17q24.2	0.308656	1.01756e-12
POLE4	2p12	0.308624	1.02331e-12
MICOS13	19p13.3	0.308552	1.03654e-12
NSDHL	Xq28	0.308484	1.04889e-12
MRPS7	17q25.1	0.308202	1.10241e-12
FARSB	2q36.1	0.308092	1.12393e-12
KIF4A	Xq13.1	0.308006	1.14118e-12
ADSSL1	14q32.33	0.307965	1.14939e-12
SPHK1	17q25.1	0.307806	1.18203e-12
COA8	14q32.33	0.307727	1.19856e-12
PGD	1p36.22	0.307613	1.22286e-12
CYREN	7q33	0.307586	1.22851e-12
SGTA	19p13.3	0.307521	1.24274e-12
HSF1	8q24.3	0.307222	1.3097e-12
ABCF2	7q36.1	0.307102	1.33749e-12
DDIT4	10q22.1	0.306903	1.38507e-12
TRIAP1	12q24.31	0.306872	1.39251e-12
TPRKB	2p13.1	0.30679	1.41265e-12
MYL6	12q13.2	0.306699	1.43528e-12
NUF2	1q23.3	0.306442	1.50134e-12
FUCA2	6q24.2	0.306002	1.62157e-12
CDCA5	11q13.1	0.305927	1.64297e-12
DPY30	2p22.3	0.305792	1.68196e-12
PSMD12	17q24.2	0.305686	1.71332e-12
LINC00467	1q32.3	0.30544	1.78845e-12
C4ORF48	4p16.3	0.305408	1.79859e-12
CNPY2	12q13.3	0.305288	1.83647e-12
ESPL1	12q13.13	0.305075	1.90582e-12
AUP1	2p13.1	0.305061	1.9106e-12
LIPK	10q23.31	0.30498	1.9378e-12
ORC1	1p32.3	0.304673	2.04371e-12
OLA1	2q31.1	0.304591	2.07338e-12
EIF3B	7p22.3	0.304546	2.08933e-12
CSNK2B	6p21.33	0.304382	2.14988e-12
S100A9	1q21.3	0.304366	2.1559e-12
RPS2	16p13.3	0.304241	2.20292e-12
NDUFA13	19p13.11	0.304236	2.20505e-12
FBXL19	16p11.2	0.30396	2.31292e-12
MRPL9	1q21.3	0.303948	2.31771e-12
PYM1	12q13.2	0.303922	2.32833e-12
ATAD3A	1p36.33	0.303876	2.34719e-12
GALK1	17q25.1	0.303874	2.34798e-12
HHIPL2	1q41	0.303787	2.38339e-12
RPL39L	3q27.3	0.30373	2.40724e-12
STIP1	11q13.1	0.303724	2.40969e-12
CTSV	9q22.33	0.303718	2.41211e-12
SWI5	9q34.11	0.303704	2.41801e-12
ATP5F1B	12q13.3	0.303627	2.4503e-12
PRDX2	19p13.13	0.303574	2.47307e-12
RHOV	15q15.1	0.303435	2.53328e-12
VPS25	17q21.2	0.303424	2.53784e-12
ALDOC	17q11.2	0.303386	2.55453e-12
PUF60	8q24.3	0.303127	2.67151e-12
SOD1	21q22.11	0.30309	2.68893e-12
CBX8	17q25.3	0.303056	2.70463e-12
RRP9	3p21.2	0.303031	2.71651e-12
SMIM12	1p34.3	0.302993	2.73409e-12
CHKB-DT	22q13.33	0.30298	2.74055e-12
ZWINT	10q21.1	0.302849	2.80299e-12
CENPX	17q25.3	0.302821	2.81671e-12
TLCD3B	16p11.2	0.302706	2.87303e-12
PARL	3q27.1	0.30269	2.881e-12
SIVA1	14q32.33	0.302629	2.91167e-12
RCC1	1p35.3	0.302573	2.93959e-12
SPNS1	16p11.2	0.302568	2.942e-12
EEF2KMT	16p13.3	0.302346	3.05674e-12
MTHFD2	2p13.1	0.302276	3.0941e-12
TMUB1	7q36.1	0.302178	3.1466e-12
NEK2	1q32.3	0.302142	3.16629e-12
LYPD3	19q13.31	0.302072	3.20431e-12
STC2	5q35.2	0.301996	3.24687e-12
ATIC	2q35	0.301936	3.28041e-12
FEN1	11q12.2	0.301863	3.32184e-12
NDUFB11	Xp11.3	0.301738	3.39391e-12
EIF4A3	17q25.3	0.301666	3.43643e-12
PDF	16q22.1	0.301381	3.60822e-12
MT1X	16q13	0.301257	3.68615e-12
ZNF598	16p13.3	0.301198	3.72376e-12
CCL26	7q11.23	0.301012	3.8445e-12
LMAN2	5q35.3	0.300996	3.85468e-12
GLA	Xq22.1	0.300825	3.96954e-12
GOT2	16q21	0.300805	3.98289e-12
GPS1	17q25.3	0.300724	4.0388e-12
NIP7	16q22.1	0.300705	4.05176e-12
AKR1B15	7q33	0.300469	4.21896e-12
DUSP23	1q23.2	0.300384	4.28054e-12
CDIPT	16p11.2	0.300294	4.34675e-12
RECQL4	8q24.3	0.300193	4.42251e-12
B4GALT2	1p34.1	0.300178	4.43393e-12
KISS1R	19p13.3	0.300042	4.5379e-12
COA6	1q42.2	0.300001	4.56993e-12

## Sheet: FBP1 correlated molecules
Supplementary Table 1
Genes correlated to ALDOA and FBP1 expression of LUAD in the TCGA (PanCancer Atlas dataset).
Correlated Gene	Cytoband	Spearman's Correlation	p-Value
PDCD5	19q13.11	-0.299564	4.92295e-12
SNRPB	20p13	-0.299598	4.89472e-12
UCN2	3p21.31	-0.299619	4.87756e-12
PDIA4	7q36.1	-0.299737	4.77993e-12
NIF3L1	2q33.1	-0.29992	4.63304e-12
2021-03-07	2q24.2	-0.300161	4.44669e-12
PRMT1	19q13.33	-0.300281	4.35646e-12
SCML2	Xp22.13	-0.300361	4.2971e-12
MYO19	17q12	-0.300502	4.19461e-12
TACC3	4p16.3	-0.300595	4.12848e-12
EXTL2	1p21.2	-0.300597	4.12714e-12
POPDC3	6q21	-0.300648	4.09154e-12
LYPD3	19q13.31	-0.300746	4.02337e-12
GNPNAT1	14q22.1	-0.300781	3.99914e-12
ABCE1	4q31.21	-0.30083	3.96602e-12
PSMG1	21q22.2	-0.300881	3.93162e-12
USP14	18p11.32	-0.300919	3.90581e-12
PACC1	1q32.3	-0.301156	3.75051e-12
DRP2	Xq22.1	-0.301225	3.70618e-12
GPC6	13q31.3-q32.1	-0.301341	3.63347e-12
AGMAT	1p36.21	-0.301396	3.59931e-12
CPA4	7q32.2	-0.301398	3.5977e-12
NABP2	12q13.3	-0.301483	3.5462e-12
MOB4	2q33.1	-0.301525	3.52052e-12
TMEM14A	6p12.2	-0.301552	3.50418e-12
ADAMTS20	12q12	-0.301722	3.40355e-12
IL11	19q13.42	-0.301755	3.38415e-12
EDC3	15q24.1	-0.301819	3.34688e-12
PSME3	17q21.31	-0.301868	3.31891e-12
DPM1	20q13.13	-0.301925	3.28651e-12
LEMD3	12q14.3	-0.301985	3.25309e-12
CCDC150	2q33.1	-0.30205	3.21697e-12
TFG	3q12.2	-0.302074	3.20361e-12
OTX1	2p15	-0.302105	3.18633e-12
POLR1A	2p11.2	-0.302159	3.15671e-12
METTL8	2q31.1	-0.302499	2.97761e-12
B3GALNT2	1q42.3	-0.302599	2.92675e-12
ZNF260	19q13.12	-0.302898	2.7795e-12
BASP1	5p15.1	-0.303295	2.59501e-12
ADIPOR2	12p13.33	-0.303407	2.54556e-12
LEO1	15q21.2	-0.303536	2.4895e-12
RACGAP1P	12q12	-0.303608	2.45868e-12
GAL	11q13.2	-0.303625	2.45116e-12
SUPT16H	14q11.2	-0.303721	2.41075e-12
ATP2A2	12q24.11	-0.303729	2.40735e-12
PPAT	4q12	-0.303862	2.35275e-12
ARL6IP6	2q23.3	-0.303898	2.33793e-12
DCUN1D5	11q22.3	-0.304087	2.2626e-12
NAE1	16q22.1	-0.304099	2.25785e-12
CBX2	17q25.3	-0.304155	2.23605e-12
RTTN	18q22.2	-0.304284	2.18652e-12
MKKS	20p12.2	-0.304289	2.18497e-12
MRPL47	3q26.33	-0.304324	2.17176e-12
U2AF2	19q13.42	-0.304399	2.14351e-12
PSMB5	14q11.2	-0.304451	2.12432e-12
SART3	12q23.3	-0.304483	2.11244e-12
UBE2C	20q13.12	-0.304657	2.04947e-12
PTGES3	12q13.3|12	-0.304878	1.97227e-12
SUDS3	12q24.23	-0.304948	1.94849e-12
SLC35E3	12q15	-0.30499	1.93439e-12
HBS1L	6q23.3	-0.305059	1.91106e-12
BRCA2	13q13.1	-0.305161	1.87741e-12
SP9	2q31.1	-0.305183	1.87033e-12
HOXD10	2q31.1	-0.305535	1.75899e-12
IPO5	13q32.2	-0.305632	1.72975e-12
IPO8	12p11.21	-0.306106	1.59236e-12
ERGIC2	12p11.22	-0.306117	1.58912e-12
CALU	7q32.1	-0.306236	1.55656e-12
CDC5L	6p21.1	-0.306269	1.54743e-12
GMEB1	1p35.3	-0.306593	1.46221e-12
DDX21	10q22.1	-0.306646	1.44875e-12
GAST	17q21.2	-0.306803	1.40949e-12
PDK1	2q31.1	-0.306956	1.37222e-12
FAM222A	12q24.11	-0.306961	1.3711e-12
CMSS1	3q12.1	-0.307031	1.35416e-12
SELENOV	19q13.2	-0.307079	1.34291e-12
CUL2	10p11.21	-0.30708	1.34263e-12
SMC3	10q25.2	-0.307108	1.33613e-12
LINC00887	3q29	-0.307126	1.33198e-12
DDOST	1p36.12	-0.307515	1.24397e-12
FANCA	16q24.3	-0.307748	1.19405e-12
ZW10	11q23.2	-0.307851	1.17258e-12
SLC7A1	13q12.3	-0.307858	1.17111e-12
DHX37	12q24.31	-0.307881	1.16641e-12
C1QL4	12q13.12	-0.307917	1.15916e-12
HIST1H2BO	6p22.1	-0.308251	1.09285e-12
CHAF1B	21q22.12-q22.13	-0.308463	1.0528e-12
PPM1G	2p23.3	-0.308511	1.04395e-12
RBM28	7q32.1	-0.308693	1.01097e-12
SH2D5	1p36.12	-0.30875	1.00095e-12
ZNF367	9q22.32|9q22.32	-0.309114	9.38598e-13
CRY1	12q23.3	-0.309151	9.32367e-13
MAGEA1	Xq28	-0.309232	9.19134e-13
NOP58	2q33.1	-0.30933	9.03374e-13
TRMT61B	2p23.2	-0.309347	9.00639e-13
INHA	2q35	-0.309372	8.96627e-13
USP10	16q24.1	-0.30943	8.87503e-13
SMNDC1	10q25.2	-0.309536	8.7109e-13
FAM111B	11q12.1	-0.309608	8.5997e-13
LIN28B	6q16.3-q21	-0.309965	8.0726e-13
VRK2	2p16.1	-0.310062	7.93494e-13
YY1	14q32.2	-0.310094	7.8898e-13
SERBP1	1p31.3	-0.310105	7.87487e-13
KLHL42	12p11.22	-0.310168	7.78758e-13
STC1	8p21.2	-0.310232	7.70019e-13
SSRP1	11q12.1	-0.310336	7.55935e-13
LIN9	1q42.12	-0.311027	6.68481e-13
UTP20	12q23.2	-0.311103	6.59545e-13
CDK8	13q12.13	-0.311212	6.46796e-13
WDCP	2p23.3	-0.311621	6.01327e-13
ARTN	1p34.1	-0.311623	6.01092e-13
POP1	8q22.2	-0.311671	5.95994e-13
LINC00473	6q27	-0.311734	5.89368e-13
MFSD2B	2p23.3	-0.311741	5.88569e-13
SLC33A1	3q25.31	-0.311886	5.73581e-13
MESD	15q25.1	-0.311976	5.64372e-13
ASB1	2q37.3	-0.312069	5.55153e-13
CDH24	14q11.2	-0.312181	5.44109e-13
FOXD1	5q13.2	-0.312262	5.36291e-13
STEAP1B	7p15.3	-0.312265	5.35998e-13
SINHCAF	12p11.21	-0.31231	5.31666e-13
CEP97	3q12.3	-0.312647	5.00581e-13
DHX9	1q25.3	-0.31268	4.97601e-13
CCDC58	3q21.1	-0.312826	4.84751e-13
COPS8	2q37.3	-0.313081	4.63076e-13
GANAB	11q12.3	-0.313114	4.6033e-13
YES1	18p11.32	-0.313129	4.59139e-13
MPHOSPH6	16q23.3	-0.313191	4.54017e-13
HSF2BP	21q22.3	-0.313461	4.3259e-13
CWC22	2q31.3	-0.313706	4.13912e-13
PSRC1	1p13.3	-0.313743	4.11194e-13
LSM14A	19q13.11	-0.313855	4.03008e-13
PHGDH	1p12	-0.313986	3.93609e-13
LZIC	1p36.22	-0.314092	3.8615e-13
MCM7	7q22.1	-0.314188	3.79526e-13
TWF1	12q12	-0.314266	3.74261e-13
EIF4A3	17q25.3	-0.314319	3.70648e-13
SLC39A14	8p21.3	-0.31434	3.69243e-13
DSP	6p24.3	-0.314407	3.64846e-13
LOC399815	10q26.13	-0.314525	3.5715e-13
SPECC1	17p11.2	-0.314656	3.48807e-13
SPANXA2	Xq27.2	-0.314683	3.47145e-13
CEP89	19q13.11	-0.314739	3.43614e-13
HSP90AA1	14q32.31	-0.31476	3.42309e-13
CRNKL1	20p11.23	-0.314848	3.36906e-13
RBM12	20q11.22	-0.314902	3.33682e-13
USP37	2q35	-0.314979	3.2907e-13
TDP1	14q32.11	-0.315004	3.27548e-13
RNGTT	6q15	-0.315023	3.26456e-13
HIST1H3B	6p22.2	-0.315046	3.25091e-13
DNAJC14	12q13.2	-0.315063	3.241e-13
INA	10q24.33	-0.315324	3.09168e-13
CEBPZ	2p22.2	-0.315378	3.06129e-13
LMAN1	18q21.32	-0.31576	2.85705e-13
PTPN11	12q24.13	-0.31577	2.85145e-13
BAG2	6p12.1	-0.315941	2.7644e-13
NOCT	4q31.1	-0.316148	2.66277e-13
DTYMK	2q37.3	-0.316332	2.57503e-13
PREB	2p23.3	-0.316437	2.52639e-13
PTPRN	2q35	-0.316715	2.4019e-13
CKAP5	11p11.2	-0.316731	2.39499e-13
WBP11	12p12.3	-0.316859	2.3398e-13
PKN2	1p22.2	-0.316958	2.29828e-13
GSK3B	3q13.33	-0.317036	2.26564e-13
ZNF384	12p13.31	-0.317122	2.23053e-13
BRIP1	17q23.2	-0.317171	2.21079e-13
TRIM28	19q13.43	-0.317181	2.2068e-13
FANCG	9p13.3	-0.317215	2.193e-13
DNMT3A	2p23.3	-0.317429	2.10905e-13
ABCF1	6p21.33	-0.317531	2.07045e-13
HEATR1	1q43	-0.317853	1.95213e-13
FEM1B	15q23	-0.317922	1.92756e-13
PFDN4	20q13.2	-0.318169	1.84251e-13
NOLC1	10q24.32	-0.318688	1.67548e-13
DSN1	20q11.23	-0.318808	1.63918e-13
DCAF17	2q31.1	-0.318828	1.63329e-13
PNO1	2p14	-0.319022	1.57598e-13
MARK1	1q41	-0.319538	1.43365e-13
GTPBP4	10p15.3	-0.319614	1.4137e-13
C2ORF69	2q33.1	-0.31967	1.39921e-13
AGPAT5	8p23.1	-0.319716	1.38747e-13
PPP3R1	2p14	-0.320334	1.23828e-13
KPNA1	3q21.1	-0.320732	1.15057e-13
UBXN2A	2p23.3	-0.320752	1.14623e-13
SERPINB5	18q21.33	-0.320954	1.10424e-13
PDHX	11p13	-0.321052	1.08454e-13
AAGAB	15q23	-0.321084	1.07802e-13
MGME1	20p11.23	-0.321698	9.62274e-14
TAF11	6p21.31	-0.321719	9.58629e-14
SAAL1	11p15.1	-0.321867	9.32664e-14
FARSB	2q36.1	-0.321903	9.26476e-14
ARNTL2	12p11.23	-0.321969	9.15213e-14
EIF2S1	14q23.3	-0.3223	8.60626e-14
HOXD13	2q31.1	-0.322367	8.50017e-14
NUP155	5p13.2	-0.322423	8.41138e-14
PPP1CC	12q24.11	-0.322499	8.29367e-14
ATF1	12q13.12	-0.322654	8.05769e-14
NRAS	1p13.2	-0.322789	7.85832e-14
DKC1	Xq28	-0.322808	7.83107e-14
NUDCD1	8q23.1	-0.322811	7.82586e-14
TRIP12	2q36.3	-0.323178	7.30898e-14
DHX57	2p22.1	-0.323243	7.22197e-14
STXBP5	6q24.3	-0.323337	7.0963e-14
TTL	2q14.1	-0.323364	7.06002e-14
UBE2G1	17p13.2	-0.323503	6.88012e-14
EGLN3	14q13.1	-0.323706	6.62449e-14
EZH2	7q36.1	-0.323942	6.33836e-14
DONSON	21q22.11	-0.32405	6.21202e-14
NUP205	7q33	-0.324186	6.05615e-14
TSR1	17p13.3	-0.32425	5.98373e-14
SLC39A6	18q12.2	-0.324542	5.66511e-14
OLA1	2q31.1	-0.324599	5.60576e-14
FAM136A	2p13.3	-0.324772	5.42679e-14
ZNF639	3q26.33	-0.324931	5.26699e-14
BUB3	10q26.13	-0.3252	5.00769e-14
SMO	7q32.1	-0.325273	4.94028e-14
LMNB2	19p13.3	-0.32546	4.76947e-14
CTDSPL2	15q15.3-q21.1	-0.325535	4.70292e-14
CEBPG	19q13.11	-0.325676	4.58002e-14
CENPH	5q13.2	-0.325688	4.56967e-14
URB2	1q42.13	-0.325732	4.5314e-14
GCN1	12q24.23	-0.325775	4.495e-14
GPN1	2p23.3	-0.325792	4.48064e-14
RUVBL1	3q21.3	-0.325836	4.44373e-14
GFM1	3q25.32	-0.32591	4.38217e-14
BCL2L10	15q21.2	-0.326085	4.24028e-14
MCM3	6p12.2	-0.32629	4.07958e-14
MZT1	13q21.33	-0.326319	4.05725e-14
PGAM5	12q24.33	-0.326646	3.81474e-14
STAG1	3q22.3	-0.326922	3.62141e-14
ATAD2	8q24.13	-0.327419	3.29645e-14
BYSL	6p21.1	-0.327565	3.20648e-14
AURKAP1	1q41	-0.327581	3.19688e-14
GINS3	16q21	-0.327856	3.03421e-14
MRPL30	2q11.2	-0.327889	3.01535e-14
SNRNP200	2q11.2	-0.328126	2.88303e-14
U2SURP	3q23	-0.328396	2.73887e-14
MMADHC	2q23.2	-0.328601	2.63431e-14
MPHOSPH9	12q24.31	-0.328892	2.49267e-14
GTF3C2	2p23.3	-0.329352	2.28363e-14
DEK	6p22.3	-0.32936	2.28015e-14
TARS	5p13.3	-0.329515	2.21362e-14
DHX33	17p13.2	-0.329689	2.1413e-14
CCT6A	7p11.2	-0.329713	2.13166e-14
ZNF697	1p12	-0.329875	2.0666e-14
NDUFS1	2q33.3	-0.330073	1.9898e-14
ANAPC7	12q24.11	-0.330305	1.90349e-14
SHCBP1	16q11.2	-0.330448	1.85225e-14
RBL1	20q11.23	-0.330551	1.81588e-14
HMGXB4	22q12.3	-0.330931	1.6885e-14
DIP2B	12q13.12	-0.330995	1.66781e-14
TRA2B	3q27.2	-0.331493	1.51597e-14
PSMD2	3q27.1	-0.331764	1.43882e-14
PSMC4	19q13.2	-0.331964	1.38464e-14
MPP6	7p15.3	-0.332229	1.31577e-14
CCNE1	19q12	-0.332629	1.21808e-14
SPC24	19p13.2	-0.332691	1.20357e-14
RFWD3	16q23.1	-0.33275	1.19009e-14
RECQL	12p12.1	-0.332765	1.18668e-14
GABRQ	Xq28	-0.332782	1.18259e-14
SEPHS1	10p13	-0.332905	1.15495e-14
SLC30A6	2p22.3	-0.333241	1.08225e-14
KIF3B	20q11.21	-0.333253	1.07974e-14
BORA	13q21.33	-0.333296	1.07098e-14
TAF1A	1q41	-0.333331	1.06375e-14
CABYR	18q11.2	-0.333443	1.04091e-14
RCN2	15q24.3	-0.333448	1.03981e-14
WDR62	19q13.12	-0.333458	1.03794e-14
PSMD12	17q24.2	-0.333699	9.90579e-15
KCTD3	1q41	-0.334053	9.24836e-15
PRMT5	14q11.2	-0.334231	8.93489e-15
EIF3J	15q21.1	-0.334519	8.44929e-15
ZNF770	15q14	-0.334539	8.41646e-15
E2F2	1p36.12	-0.334719	8.12734e-15
FXR1	3q26.33	-0.334859	7.90828e-15
SPATA5	4q28.1	-0.335047	7.62489e-15
PLOD2	3q24	-0.335104	7.54058e-15
INHBE	12q13.3	-0.335256	7.32007e-15
PRKDC	8q11.21	-0.33569	6.72748e-15
DCLRE1A	10q25.3	-0.335724	6.68187e-15
MASTL	10p12.1	-0.335801	6.58324e-15
SLC7A5	16q24.2	-0.336018	6.30987e-15
MAPRE1	20q11.21	-0.336104	6.20511e-15
CENPU	4q35.1	-0.336185	6.10658e-15
G2E3	14q12	-0.336422	5.8311e-15
ZNF8	19q13.43	-0.3367	5.52206e-15
TET1	10q21.3	-0.336768	5.44861e-15
POLR3F	20p11.23	-0.337025	5.18087e-15
CEP76	18p11.21	-0.337148	5.05801e-15
RPE	2q34	-0.337189	5.01761e-15
HMMR	5q34	-0.337253	4.95514e-15
ADAM17	2p25.1	-0.33732	4.89036e-15
NEMP1	12q13.3	-0.337414	4.80032e-15
NEIL3	4q34.3	-0.337451	4.76572e-15
USP1	1p31.3	-0.337625	4.60548e-15
NCAPD3	11q25	-0.337852	4.40519e-15
GCLC	6p12.1	-0.338408	3.94819e-15
FANCD2	3p25.3	-0.338637	3.77368e-15
NEDD1	12q23.1	-0.338644	3.76907e-15
KPNA4	3q25.33	-0.338722	3.71112e-15
TTI1	20q11.23	-0.338919	3.56994e-15
UBXN4	2q21.3	-0.339094	3.44861e-15
CDCA4	14q32.33	-0.339296	3.31372e-15
RPL7L1	6p21.1	-0.339308	3.30591e-15
LSG1	3q29	-0.3396	3.12022e-15
MIB1	18q11.2	-0.341134	2.30173e-15
CKAP2	13q14.3	-0.341527	2.12838e-15
DDX47	12p13.1	-0.341613	2.09214e-15
LINC01600	6p25.2	-0.341812	2.01082e-15
RRM1	11p15.4	-0.342147	1.88063e-15
PSMC3IP	17q21.2	-0.342343	1.80862e-15
SLC7A11	4q28.3	-0.342489	1.75639e-15
BARD1	2q35	-0.342533	1.741e-15
CKS1B	1q21.3	-0.342563	1.73089e-15
LMNB1	5q23.2	-0.342565	1.73003e-15
PAPOLA	14q32.2	-0.342731	1.67339e-15
PRKAA2	1p32.2	-0.342754	1.66585e-15
SLC6A17	1p13.3	-0.342766	1.66174e-15
AGFG1	2q36.3	-0.342845	1.63586e-15
ERLIN1	10q24.31	-0.342893	1.62002e-15
SLC2A1	1p34.2	-0.343219	1.51775e-15
MSI2	17q22	-0.343244	1.50997e-15
CCT4	2p15	-0.343336	1.48254e-15
MIR924HG	18q12.2-q12.3	-0.34403	1.28973e-15
MTBP	8q24.12	-0.344459	1.18293e-15
VTA1	6q24.1-q24.2	-0.344654	1.1375e-15
C15ORF41	15q14	-0.344671	1.13355e-15
SRGAP1	12q14.2	-0.344884	1.08597e-15
LRRC42	1p32.3	-0.345104	1.03873e-15
DDX18	2q14.1	-0.345258	1.00699e-15
DNAJB4	1p31.1	-0.345404	9.778e-16
KPNB1	17q21.32	-0.345577	9.44125e-16
SAMD4B	19q13.2	-0.345671	9.26325e-16
KIF3C	2p23.3	-0.345757	9.10454e-16
DBF4	7q21.12	-0.345934	8.78358e-16
MTFR2	6q23.3	-0.346038	8.60098e-16
XRCC2	7q36.1	-0.346249	8.24085e-16
RPAP3	12q13.11	-0.346797	7.3732e-16
KHDRBS1	1p35.2	-0.346888	7.2381e-16
DNAJC9	10q22.2	-0.346975	7.11114e-16
NAA25	12q24.13	-0.347071	6.97396e-16
TBCCD1	3q27.3	-0.347105	6.92668e-16
HMGA1	6p21.31	-0.347154	6.85773e-16
NFXL1	4p12	-0.347177	6.82627e-16
MEST	7q32.2	-0.347803	6.00906e-16
IMMT	2p11.2|2	-0.347837	5.96764e-16
GBX2	2q37.2	-0.347883	5.91196e-16
SUZ12	17q11.2	-0.347942	5.84081e-16
TCP1	6q25.3	-0.347985	5.79072e-16
ALG10	12p11.1	-0.348182	5.56162e-16
TRIP13	5p15.33	-0.348228	5.51067e-16
SFPQ	1p34.3	-0.348405	5.3151e-16
NAB1	2q32.2	-0.349105	4.60625e-16
TYMS	18p11.32	-0.349133	4.57975e-16
ATP13A3	3q29	-0.349366	4.36642e-16
RAE1	20q13.31	-0.349375	4.35806e-16
B4GALT4	3q13.32	-0.349478	4.26698e-16
SPDL1	5q35.1	-0.349636	4.13099e-16
CHORDC1	11q14.3	-0.349743	4.04094e-16
KIAA1549	7q34	-0.349754	4.03191e-16
STC2	5q35.2	-0.349758	4.0285e-16
PGM3	6q14.1	-0.349854	3.95013e-16
GTF2H3	12q24.31	-0.349893	3.91845e-16
SMOX	20p13	-0.35019	3.68703e-16
PUS7L	12q12	-0.35071	3.31304e-16
TFAM	10q21.1	-0.350786	3.26135e-16
NAA15	4q31.1	-0.351858	2.61403e-16
DNMT3B	20q11.21	-0.352023	2.5261e-16
PWP1	12q23.3	-0.352175	2.4483e-16
YWHAQ	2p25.1	-0.352263	2.40391e-16
UBE2S	19q13.42	-0.352369	2.35164e-16
C19ORF48	19q13.33	-0.352516	2.28139e-16
AGO3	1p34.3	-0.352555	2.26278e-16
CEP55	10q23.33	-0.352638	2.2243e-16
ARL5B	10p12.31	-0.352834	2.13578e-16
SKIL	3q26.2	-0.352851	2.12806e-16
CDT1	16q24.3	-0.353154	1.99839e-16
UBE2E3	2q31.3	-0.353219	1.97159e-16
SBNO1	12q24.31	-0.353303	1.93762e-16
STMN1	1p36.11	-0.353338	1.92325e-16
PLEKHH1	14q24.1	-0.353387	1.90398e-16
CASC15	6p22.3	-0.353572	1.83198e-16
TMEM185B	2q14.2	-0.353619	1.8143e-16
TPRKB	2p13.1	-0.353862	1.72472e-16
CCDC77	12p13.33	-0.353946	1.6948e-16
AKIRIN1	1p34.3	-0.354023	1.668e-16
FANCM	14q21.2	-0.354557	1.49203e-16
ITGB1	10p11.22	-0.354815	1.41383e-16
TUBB	6p21.33	-0.354979	1.36603e-16
GINS2	16q24.1	-0.355218	1.29945e-16
TAF2	8q24.12	-0.355811	1.14784e-16
UGGT1	2q14.3	-0.355839	1.14107e-16
KIF4B	5q33.2	-0.356004	1.10231e-16
UBE2T	1q32.1	-0.356071	1.08678e-16
IGF2BP1	17q21.32	-0.356096	1.0812e-16
COA7	1p32.3	-0.356247	1.04736e-16
MRPL42	12q22	-0.356404	1.01346e-16
HSP90B1	12q23.3	-0.356674	9.57502e-17
SMARCD1	12q13.12	-0.356687	9.54907e-17
EIF2S2	20q11.22	-0.356757	9.41028e-17
DTL	1q32.3	-0.357101	8.75236e-17
CENPW	6q22.32	-0.357492	8.05943e-17
TTPAL	20q13.12	-0.35807	7.13353e-17
NUP37	12q23.2	-0.358192	6.95217e-17
BRCA1	17q21.31	-0.358455	6.5752e-17
B4GALT6	18q12.1	-0.358494	6.5219e-17
CCT2	12q15	-0.358736	6.19623e-17
SAE1	19q13.32	-0.358948	5.92427e-17
GNG4	1q42.3	-0.358987	5.87442e-17
VRK1	14q32.2	-0.35902	5.83427e-17
GINS4	8p11.21	-0.35946	5.31383e-17
SMC6	2p24.2	-0.359514	5.25347e-17
MRPL35	2p11.2	-0.359737	5.01045e-17
JARID2	6p22.3	-0.359966	4.77141e-17
LRPPRC	2p21	-0.360049	4.68801e-17
MAPK8	10q11.22	-0.36076	4.02878e-17
MAP4K4	2q11.2	-0.360944	3.87378e-17
ORC2	2q33.1	-0.360947	3.87127e-17
EEF1E1	6p24.3	-0.361059	3.78032e-17
LARP6	15q23	-0.36107	3.77095e-17
XPO1	2p15	-0.361362	3.54273e-17
ATAD5	17q11.2	-0.361379	3.5298e-17
INCENP	11q12.3	-0.36161	3.35977e-17
PRTFDC1	10p12.1	-0.36201	3.08372e-17
KCMF1	2p11.2	-0.362077	3.03985e-17
CPSF2	14q32.12	-0.362229	2.94266e-17
SMC2	9q31.1	-0.362841	2.57997e-17
ANLN	7p14.2	-0.363086	2.44767e-17
C1ORF112	1q24.2	-0.36331	2.33273e-17
CENPL	1q25.1	-0.363339	2.31832e-17
CDC25C	5q31.2	-0.364275	1.89424e-17
CPSF3	2p25.1	-0.364769	1.70245e-17
PHF6	Xq26.2	-0.364846	1.67432e-17
ZFP69B	1p34.2	-0.365073	1.59389e-17
HSPA13	21q11.2	-0.365147	1.56871e-17
MIS18A	21q22.11	-0.365368	1.49532e-17
CHEK2	22q12.1	-0.365645	1.40798e-17
LRP12	8q22.3	-0.365673	1.39938e-17
TMEM237	2q33.1	-0.365894	1.33405e-17
TNPO1	5q13.2	-0.366114	1.27153e-17
CAND1	12q14.3-q15	-0.366318	1.21644e-17
ADNP	20q13.13	-0.366507	1.16744e-17
INTS13	12p11.23	-0.3672	1.00382e-17
FUBP1	1p31.1	-0.367212	1.00119e-17
FEN1	11q12.2	-0.367459	9.48453e-18
GABPB1	15q21.2	-0.367555	9.28898e-18
PIF1	15q22.31	-0.368022	8.38647e-18
CENPK	5q12.3	-0.369378	6.2287e-18
CTPS1	1p34.2	-0.36938	6.22554e-18
MARS	12q13.3	-0.36959	5.9445e-18
FAAP24	19q13.11	-0.36974	5.75118e-18
ZC3H8	2q14.1	-0.369776	5.70566e-18
UHRF1	19p13.3	-0.369811	5.66205e-18
DIAPH3	13q21.2	-0.369956	5.4843e-18
ADA	20q13.12	-0.370598	4.76005e-18
XRN2	20p11.22	-0.370607	4.75088e-18
MCM6	2q21.3	-0.370685	4.66928e-18
PNPT1	2p16.1	-0.370987	4.36797e-18
DDIAS	11q14.1	-0.371196	4.17074e-18
DEPDC1B	5q12.1	-0.371459	3.93466e-18
FAM98B	15q14	-0.371663	3.76052e-18
AURKB	17p13.1	-0.371822	3.62997e-18
NMD3	3q26.1	-0.371959	3.52147e-18
LCLAT1	2p23.1	-0.371966	3.51596e-18
ZFP64	20q13.2	-0.372068	3.43736e-18
SLC5A6	2p23.3	-0.372352	3.22722e-18
DDX1	2p24.3	-0.372538	3.09652e-18
KPNA2	17q24.2	-0.3727	2.98677e-18
TMEM117	12q12	-0.37288	2.86976e-18
MELK	9p13.2	-0.373087	2.74028e-18
PSMD11	17q11.2	-0.37322	2.66013e-18
SSB	2q31.1	-0.373397	2.55723e-18
TESMIN	11q13.3	-0.374006	2.23225e-18
OPA1	3q29	-0.374302	2.0894e-18
SUV39H2	10p13	-0.374339	2.07194e-18
GMPS	3q25.31	-0.374454	2.01938e-18
FIGN	2q24.3	-0.374589	1.95925e-18
MMS22L	6q16.1	-0.374605	1.95249e-18
FAM131C	1p36.13	-0.37502	1.77915e-18
DCUN1D1	3q26.33	-0.375345	1.65371e-18
PAK1IP1	6p24.2	-0.375569	1.57254e-18
SNRPD1	18q11.2	-0.375587	1.56627e-18
SRPK1	6p21.31	-0.375728	1.51764e-18
C17ORF53	17q21.31	-0.375809	1.49006e-18
NRDC	1p32.3	-0.376192	1.36691e-18
IGF2BP3	7p15.3	-0.376587	1.25063e-18
MKI67	10q26.2	-0.376771	1.19976e-18
MCM4	8q11.21	-0.376865	1.17449e-18
RAD51	15q15.1	-0.376867	1.17404e-18
SSR1	6p24.3	-0.376893	1.16717e-18
RIF1	2q23.3	-0.377052	1.12606e-18
FANCB	Xp22.2	-0.377267	1.07252e-18
RAB10	2p23.3	-0.377447	1.02978e-18
BRI3BP	12q24.31	-0.377653	9.82912e-19
TBC1D31	8q24.13	-0.377685	9.75875e-19
MSH6	2p16.3	-0.377837	9.42778e-19
PLK4	4q28.1	-0.377903	9.28847e-19
ACTL6A	3q26.33	-0.378117	8.84896e-19
MTIF2	2p16.1	-0.379393	6.62228e-19
HOXD11	2q31.1	-0.379588	6.33446e-19
RAD54B	8q22.1	-0.37963	6.27397e-19
DDX52	17q12	-0.379876	5.9316e-19
CTSV	9q22.33	-0.380006	5.75807e-19
E2F8	11p15.1	-0.380029	5.72742e-19
ORC6	16q11.2	-0.380044	5.70847e-19
DNA2	10q21.3	-0.380221	5.48196e-19
XPO5	6p21.1	-0.380542	5.09497e-19
MCM2	3q21.3	-0.380892	4.70218e-19
TMPO-AS1	12q23.1	-0.380911	4.68187e-19
MFN1	3q26.33	-0.381484	4.10647e-19
PCSK1	5q15	-0.381592	4.00584e-19
CDKN3	14q22.2	-0.381818	3.80364e-19
KNTC1	12q24.31	-0.382124	3.54536e-19
RPN2	20q11.23	-0.38225	3.44379e-19
ANAPC1	2q13	-0.382576	3.19503e-19
CDC25A	3p21.31	-0.383024	2.88181e-19
KIF18B	17q21.31	-0.383283	2.71423e-19
TLK1	2q31.1	-0.383398	2.64357e-19
PSMD14	2q24.2	-0.383681	2.47609e-19
PRIM1	12q13.3	-0.383691	2.47024e-19
BIRC5	17q25.3	-0.383868	2.37116e-19
HNRNPR	1p36.12	-0.383978	2.31159e-19
RFC3	13q13.2	-0.384302	2.14501e-19
RANBP1	22q11.21	-0.384318	2.13694e-19
KIF15	3p21.31	-0.384453	2.07126e-19
TFCP2	12q13.12-q13.13	-0.384978	1.83362e-19
GEN1	2p24.2	-0.385135	1.76788e-19
DNM1L	12p11.21	-0.385145	1.76404e-19
PPP2R1B	11q23.1	-0.38525	1.7215e-19
CAD	2p23.3	-0.385251	1.72113e-19
E2F6	2p25.1	-0.385506	1.62193e-19
FAM72D	1q21.1	-0.38598	1.45262e-19
CCDC34	11p14.1	-0.38631	1.34484e-19
RFC5	12q24.23	-0.386437	1.30577e-19
WDR76	15q15.3	-0.386668	1.23707e-19
CDK1	10q21.2	-0.386698	1.22848e-19
HSPD1	2q33.1	-0.38684	1.18848e-19
NUP107	12q15	-0.387069	1.1266e-19
KNSTRN	15q15.1	-0.387591	9.96922e-20
PLK1	16p12.2	-0.387832	9.42258e-20
DNAJB11	3q27.3	-0.387882	9.31211e-20
FAM72A	1q32.1	-0.387887	9.30145e-20
SLC38A1	12q13.11	-0.388366	8.31296e-20
ZNF286A	17p12	-0.388403	8.24174e-20
KIF20A	5q31.2	-0.389185	6.85679e-20
C2ORF49	2q12.2	-0.389216	6.80759e-20
HAT1	2q31.1	-0.389259	6.73803e-20
XPOT	12q14.2	-0.389686	6.09315e-20
PSMD1	2q37.1	-0.389965	5.70441e-20
PRPF40A	2q23.3	-0.390137	5.47713e-20
FAM72B	1p11.2	-0.390275	5.30143e-20
SKP2	5p13.2	-0.390305	5.26465e-20
SKA3	13q12.11	-0.390567	4.94782e-20
SASS6	1p21.2	-0.390689	4.80712e-20
NCAPG2	7q36.3	-0.391281	4.17764e-20
PSME4	2p16.2	-0.391937	3.57497e-20
PPIL1	6p21.2	-0.392092	3.44568e-20
CLGN	4q31.1	-0.392311	3.27136e-20
SPAG5	17q11.2	-0.392543	3.09513e-20
MYBL2	20q13.12	-0.392822	2.89623e-20
TIPIN	15q22.31	-0.392839	2.88444e-20
ZNF473	19q13.33	-0.392868	2.86477e-20
CDC27	17q21.32	-0.392923	2.82718e-20
RAN	12q24.33	-0.393216	2.6361e-20
MCM10	10p13	-0.393779	2.30405e-20
ATP2B1	12q21.33	-0.394611	1.88776e-20
CIB2	15q25.1	-0.394729	1.83503e-20
POLE2	14q21.3	-0.394995	1.72173e-20
TSN	2q14.3	-0.395444	1.54539e-20
UNG	12q24.11	-0.396378	1.23395e-20
ZWINT	10q21.1	-0.39665	1.1556e-20
PIMREG	17p13.2	-0.396927	1.08066e-20
GTF3C3	2q33.1	-0.396928	1.08045e-20
PRR11	17q22	-0.397236	1.00277e-20
PCLAF	15q22.31	-0.397515	9.37423e-21
TMPO	12q23.1	-0.397995	8.3442e-21
PCNA	20p12.3	-0.39892	6.66299e-21
E2F3	6p22.3	-0.399567	5.69199e-21
CKAP4	12q23.3	-0.399715	5.48922e-21
GMNN	6p22.3	-0.399871	5.28461e-21
RAD54L	1p34.1	-0.39991	5.23494e-21
CDCA8	1p34.3	-0.399966	5.16279e-21
ZNF146	19q13.12	-0.400585	4.43734e-21
CENPI	Xq22.1	-0.400609	4.41162e-21
SNRPA1	15q26.3	-0.401126	3.88706e-21
E2F7	12q21.2	-0.401145	3.86886e-21
GGH	8q12.3	-0.401327	3.69946e-21
DHX36	3q25.2	-0.40204	3.10533e-21
CDC20	1p34.2	-0.402272	2.93284e-21
CENPE	4q24	-0.402608	2.70009e-21
MTMR2	11q21	-0.402637	2.68022e-21
TOP2A	17q21.2	-0.403225	2.3184e-21
CDK2	12q13.2	-0.403993	1.9172e-21
NUP153	6p22.3	-0.404766	1.58267e-21
C18ORF54	18q21.2	-0.40508	1.46409e-21
CDC7	1p22.1	-0.405293	1.38866e-21
NUF2	1q23.3	-0.405475	1.32692e-21
ZRANB3	2q21.3	-0.405685	1.25946e-21
POLQ	3q13.33	-0.406078	1.14184e-21
WDHD1	14q22.2-q22.3	-0.406302	1.07994e-21
MSH2	2p21-p16.3	-0.406687	9.80901e-22
AURKA	20q13.2	-0.406715	9.74017e-22
WDR43	2p23.2	-0.407296	8.42318e-22
CLSPN	1p34.3	-0.407676	7.65751e-22
TROAP	12q13.12	-0.40813	6.83213e-22
ESPL1	12q13.13	-0.408539	6.16465e-22
HASPIN	17p13.2	-0.409066	5.39944e-22
PDIA6	2p25.1	-0.409078	5.38327e-22
MAD2L1	4q27	-0.409176	5.25128e-22
KIF20B	10q23.31	-0.409194	5.22822e-22
ESF1	20p12.1	-0.409456	4.89314e-22
CENPF	1q41	-0.409857	4.42195e-22
CSNK2A3	11p15.4	-0.410105	4.15339e-22
HDAC2	6q21	-0.410238	4.01653e-22
SGO1	3p24.3	-0.410918	3.38082e-22
KDM1A	1p36.12	-0.411117	3.21433e-22
WDR75	2q32.2	-0.411373	3.01246e-22
TOPBP1	3q22.1	-0.41215	2.47215e-22
FBXO45	3q29	-0.412312	2.37247e-22
STRAP	12p12.3	-0.412833	2.07707e-22
NOL10	2p25.1	-0.413116	1.93265e-22
CENPN	16q23.2	-0.413206	1.8886e-22
CNOT9	2q35	-0.413496	1.75359e-22
ARHGAP11B	15q13.2	-0.413828	1.61076e-22
GTSE1	22q13.31	-0.415469	1.05694e-22
CCNB1	5q13.2	-0.415527	1.04121e-22
CCDC138	2q13	-0.415597	1.02265e-22
FBXO5	6q25.2	-0.41598	9.26633e-23
CSNK2A1	20p13	-0.416092	9.00206e-23
NOP56	20p13	-0.416243	8.65793e-23
CCNA2	4q27	-0.416492	8.11957e-23
NAA50	3q13.31	-0.416617	7.86092e-23
SLC38A2	12q13.11	-0.417198	6.7644e-23
CKAP2L	2q14.1	-0.418023	5.46058e-23
CDCA3	12p13.31	-0.418502	4.82263e-23
ENTPD7	10q24.2	-0.418687	4.59495e-23
UBA2	19q13.11	-0.419266	3.95222e-23
ZC3H15	2q32.1	-0.419308	3.90874e-23
CDC45	22q11.21	-0.419429	3.78737e-23
CDC6	17q21.2	-0.42064	2.75966e-23
CDCA5	11q13.1	-0.421436	2.24e-23
ESCO2	8p21.1	-0.422595	1.65115e-23
MTHFD2	2p13.1	-0.422703	1.60457e-23
CHEK1	11q24.2	-0.422944	1.50575e-23
DENR	12q24.31	-0.423222	1.39928e-23
PBK	8p21.1	-0.423664	1.24489e-23
WDR12	2q33.2	-0.423748	1.21747e-23
NUSAP1	15q15.1	-0.424518	9.92837e-24
STIL	1p33	-0.424972	8.79899e-24
ERCC6L	Xq13.1	-0.425314	8.03504e-24
FOXM1	12p13.33	-0.426427	5.97255e-24
DSCC1	8q24.12	-0.426603	5.69735e-24
GINS1	20p11.21	-0.427402	4.6006e-24
RSRC1	3q25.32	-0.427439	4.55585e-24
KIF4A	Xq13.1	-0.428813	3.14985e-24
SSX2IP	1p22.3	-0.429491	2.62374e-24
RNASEH1	2p25.3	-0.429798	2.41486e-24
CCNB2	15q22.2	-0.429854	2.37855e-24
AUNIP	1p36.11	-0.429973	2.30362e-24
RFC4	3q27.3	-0.430851	1.81623e-24
HELLS	10q23.33	-0.432186	1.26385e-24
NEK2	1q32.3	-0.432528	1.15137e-24
NDC80	18p11.32	-0.432543	1.14669e-24
CDCA2	8p21.2	-0.433148	9.72317e-25
SKA1	18q21.1	-0.434045	7.60695e-25
PPT2	6p21.32	-0.434283	7.12717e-25
KIFC1	6p21.32	-0.434399	6.90373e-25
KRR1	12q21.2	-0.434722	6.31787e-25
ORC1	1p32.3	-0.435503	5.09792e-25
KIF11	10q23.33	-0.436724	3.64003e-25
KIF2C	1p34.1	-0.437236	3.15873e-25
RACGAP1	12q13.12	-0.43734	3.06984e-25
TTK	6q14.1	-0.4379	2.62793e-25
POFUT1	20q11.21	-0.43804	2.52768e-25
CENPA	2p23.3	-0.438755	2.07242e-25
SENP1	12q13.11	-0.438769	2.06455e-25
RAD51AP1	12p13.32	-0.439349	1.75635e-25
NCAPH	2q11.2	-0.439995	1.46649e-25
SPC25	2q24.3	-0.440339	1.33201e-25
RIOK1	6p24.3	-0.441214	1.04244e-25
NDC1	1p32.3	-0.442303	7.67738e-26
R3HDM1	2q21.3	-0.44241	7.4487e-26
XRCC5	2q35	-0.443369	5.6837e-26
TMTC3	12q21.32	-0.44437	4.28157e-26
BUB1	2q13	-0.444416	4.2257e-26
TDG	12q23.3	-0.445112	3.46799e-26
TPX2	20q11.21	-0.44574	2.90094e-26
CSE1L	20q13.13	-0.445877	2.78948e-26
ASPM	1q31.3	-0.447211	1.9059e-26
EMC1	1p36.13	-0.447828	1.59735e-26
DNAJC10	2q32.1	-0.447877	1.57488e-26
CIP2A	3q13.13	-0.44824	1.41912e-26
PRC1	15q26.1	-0.44872	1.23622e-26
TICRR	15q26.1	-0.449569	9.6801e-27
NCAPG	4p15.31	-0.450642	7.1011e-27
DLGAP5	14q22.3	-0.450963	6.46922e-27
KNL1	15q15.1	-0.450989	6.42216e-27
MLLT11	1q21.3	-0.451666	5.27653e-27
PFN2	3q25.1	-0.451763	5.13032e-27
KIF14	1q32.1	-0.452929	3.65383e-27
ARHGAP11A	15q13.3	-0.453647	2.9622e-27
HJURP	2q37.1	-0.453892	2.75795e-27
OIP5	15q15.1	-0.456418	1.31301e-27
RRM2	2p25.1	-0.457144	1.05961e-27
NCAPD2	12p13.31	-0.457248	1.02749e-27
KIF18A	11p14.1	-0.458685	6.7087e-28
PARPBP	12q23.2	-0.458822	6.44138e-28
BLM	15q26.1	-0.459418	5.39466e-28
DEPDC1	1p31.3	-0.459697	4.96456e-28
RAB3B	1p32.3	-0.460057	4.45843e-28
PAWR	12q21.2	-0.461113	3.25051e-28
BUB1B	15q15.1	-0.461617	2.79442e-28
SGO2	2q33.1	-0.462061	2.44606e-28
TRMT6	20p12.3	-0.464106	1.32021e-28
EXO1	1q43	-0.469407	2.61714e-29
ECT2	3q26.31	-0.470607	1.8072e-29
SMIM13	6p24.2	-0.471234	1.48834e-29
CENPO	2p23.3	-0.471437	1.39761e-29
TIMELESS	12q13.3	-0.471802	1.2479e-29
FANCI	15q26.1	-0.472286	1.0738e-29
SPATS2	12q13.12	-0.474748	4.98002e-30
ZWILCH	15q22.31	-0.479946	9.62993e-31
EHBP1	2p15	-0.479985	9.50824e-31
KIF23	15q23	-0.481531	5.80026e-31
UCK2	1q24.1	-0.482037	4.93181e-31
FAM83D	20q11.23	-0.482351	4.45886e-31
SELENOI	2p23.3	-0.485486	1.61954e-31
MAPK6	15q21.2	-0.48551	1.60691e-31
MCM8	20p12.3	-0.518899	1.68941e-36

## Sheet: Venn Diagram
Supplementary Table 1
Genes correlated to ALDOA and FBP1 expression of LUAD in the TCGA (PanCancer Atlas dataset).
Overlapped Gene
ESPL1
CCNB1
GINS3
DDOST
FARSB
BIRC5
PLK1
HSPD1
CDK1
NABP2
NEIL3
MRPL47
FAM72B
ORC1
NUP37
CENPH
CDCA4
CTSV
PTGES3
CDC25C
CDC6
MYBL2
MAD2L1
EIF4A3
AURKB
CKS1B
CCT4
MTHFD2
STC1
LRRC42
PSMC4
KIF4A
RUVBL1
SPDL1
RANBP1
KIF2C
LYPD3
FAM72D
PSMD2
PSMD12
CENPA
CENPN
CDC20
ZWINT
RFC4
OIP5
CCNA2
C19ORF48
PLOD2
NUF2
TROAP
TFG
CDCA5
RAN
UBE2T
SLC2A1
PSMD14
SKA3
BRI3BP
PGAM5
SHCBP1
MTFR2
UBE2S
CMSS1
PCLAF
CDCA3
PIMREG
SNRPA1
TACC3
PREB
UBE2C
CCNB2
PRC1
CDT1
CENPW
DTYMK
AUNIP
RRM2
FEN1
RAD54L
CDC45
PSMB5
SPC25
MCM2
KCMF1
PTPRN
HJURP
RAD51
HMMR
EXO1
PPM1G
EGLN3
KIF20A
ORC6
TPRKB
STC2
OLA1
CDKN3
NCAPG
CCDC58
NEK2
GINS2
CDCA8
