# Supplementary material for: The role of fructose 1,6-bisphosphate-mediated glycolysis/gluconeogenesis genes in cancer prognosis
Source: Aging (Albany NY). 2022 Apr 11;14(7):3233–58. doi: 10.18632/aging.204010 (PMC9037270; doi:10.18632/aging.204010)
Supplement: Supplementary Table 2 [file aging-14-204010-s003.xlsx]

## Sheet: ALDOA correlated molecules
Supplementary Table 2. Genes correlated to ALDOA and FBP1 expression of LUAD in the TCGA (Firehose Legacy dataset).
Correlated Gene	Cytoband	Spearman's Correlation	p-Value
GAPDH	12p13.31	0.663296	7.74919e-67
PPP4C	16p11.2	0.632885	3.27952e-59
PKM	15q23	0.582794	2.34835e-48
TPI1	12p13.31	0.577775	2.27256e-47
ENO1	1p36.23	0.563814	1.0259e-44
FAM162A	3q21.1	0.562877	1.52991e-44
LDHA	11p15.1	0.547752	8.18404e-42
BOLA2	16p11.2	0.535617	1.00799e-39
GPI	19q13.11	0.533904	1.95771e-39
PGK1	Xq21.1	0.520412	3.20493e-37
MIF	22q11.23	0.503494	1.39833e-34
NDUFAB1	16p12.2	0.501275	3.02742e-34
PLOD2	3q24	0.495153	2.47616e-33
SPAG4	20q11.22	0.495135	2.49089e-33
MRPL28	16p13.3	0.492859	5.38227e-33
SLC2A1	1p34.2	0.489954	1.42718e-32
P4HA1	10q22.1	0.483632	1.1538e-31
NDUFB4	3q13.33	0.482702	1.56312e-31
MRPS34	16p13.3	0.48146	2.342e-31
MSRB1	16p13.3	0.476827	1.04294e-30
SLC16A3	17q25.3	0.475583	1.55145e-30
PRELID1	5q35.3	0.474515	2.17859e-30
RAB5IF	20q11.23	0.470079	8.8177e-30
ALG3	3q27.1	0.469297	1.1256e-29
INO80E	16p11.2	0.469154	1.17702e-29
C16ORF91	16p13.3	0.468409	1.48468e-29
PGAM1	10q24.1	0.466472	2.70692e-29
HSD3B7	16p11.2	0.465034	4.21754e-29
ELOB	16p13.3	0.463118	7.59151e-29
TK1	17q25.3	0.462753	8.48695e-29
TBC1D10B	16p11.2	0.46114	1.38736e-28
MRPL17	11p15.4	0.460458	1.70606e-28
POP7	7q22.1	0.455469	7.64385e-28
ERO1A	14q22.1	0.450699	3.13359e-27
ANGPTL4	19p13.2	0.450212	3.61403e-27
PFKP	10p15.2	0.447215	8.66067e-27
DNAJA3	16p13.3	0.445974	1.24041e-26
COPS6	7q22.1	0.444463	1.91688e-26
PSMB3	17q12	0.444342	1.98514e-26
NDUFB10	16p13.3	0.442145	3.72285e-26
BCKDK	16p11.2	0.441817	4.08837e-26
MRPL52	14q11.2	0.440952	5.22904e-26
MDH2	7q11.23	0.440908	5.29468e-26
F12	5q35.3	0.439047	8.97011e-26
CCDC58	3q21.1	0.43764	1.33304e-25
TUBA4A	2q35	0.436567	1.80111e-25
RPL26L1	5q35.1	0.436482	1.84489e-25
FADD	11q13.3	0.435721	2.28224e-25
DIABLO	12q24.31	0.434754	2.98843e-25
TUFM	16p11.2	0.434612	3.10886e-25
DTYMK	2q37.3	0.434219	3.46749e-25
PAM16	16p13.3	0.430986	8.47347e-25
MRPL12	17q25.3	0.430908	8.65683e-25
HSPB1P1	9q21.13	0.430615	9.38137e-25
PMM2	16p13.2	0.430229	1.04296e-24
MTX1	1q22	0.429502	1.27286e-24
PSMB2	1p34.3	0.429259	1.36032e-24
DCTPP1	16p11.2	0.428578	1.63783e-24
EBNA1BP2	1p34.2	0.428168	1.83179e-24
TUBA1C	12q13.12	0.427984	1.92579e-24
PKMYT1	16p13.3	0.427873	1.98492e-24
AK4	1p31.3	0.427744	2.05582e-24
NOP16	5q35.2	0.427624	2.1238e-24
EMC9	14q12	0.426887	2.59433e-24
GADD45GIP1	19p13.13	0.426739	2.70023e-24
MTFP1	22q12.2	0.426664	2.75563e-24
PPP1R3G	6p25.1	0.426503	2.87875e-24
MRPS24	7p13	0.426443	2.92615e-24
RNASEH2A	19p13.13	0.426401	2.95928e-24
CARHSP1	16p13.2	0.42587	3.416e-24
ECE2	3q27.1	0.425742	3.5361e-24
MRPL22	5q33.2	0.424986	4.33707e-24
CHCHD2	7p11.2	0.423566	6.35168e-24
HSPB1	7q11.23	0.421177	1.20228e-23
TFG	3q12.2	0.420567	1.41383e-23
C1ORF122	1p34.3	0.419398	1.92689e-23
ATG101	12q13.13	0.418979	2.15254e-23
SFXN1	5q35.2	0.418949	2.16993e-23
AURKAIP1	1p36.33	0.418563	2.40252e-23
PGP	16p13.3	0.41691	3.7107e-23
PPP1R14B	11q13.1	0.416492	4.13963e-23
DDX41	5q35.3	0.415896	4.8387e-23
EGLN3	14q13.1	0.414447	7.05902e-23
BUD31	7q22.1	0.413986	7.95801e-23
C19ORF53	19p13.13	0.413524	8.97062e-23
PLK1	16p12.2	0.413421	9.21312e-23
NDUFS8	11q13.2	0.411936	1.35266e-22
POLR2J	7q22.1	0.411403	1.55167e-22
SSBP1	7q34	0.411127	1.66586e-22
UBE2I	16p13.3	0.41092	1.75692e-22
NSMCE1	16p12.1	0.410716	1.85169e-22
RARS	5q34	0.409097	2.8029e-22
ATP5MF	7q22.1	0.409033	2.84921e-22
MRPL37	1p32.3	0.408489	3.27295e-22
PDZD11	Xq13.1	0.407934	3.77006e-22
KIF22	16p11.2	0.407671	4.03087e-22
RAD23A	19p13.13	0.407086	4.6769e-22
APRT	16q24.3	0.406671	5.19589e-22
EBP	Xp11.23	0.40665	5.22282e-22
RFC2	7q11.23	0.405681	6.67358e-22
POLD2	7p13	0.405643	6.73753e-22
ZNHIT1	7q22.1	0.404699	8.54808e-22
PPIA	7p13	0.404524	8.9322e-22
FAM207A	21q22.3	0.404155	9.80194e-22
NABP2	12q13.3	0.403577	1.13322e-21
SEC61G	7p11.2	0.402151	1.61859e-21
CDK5	7q36.1	0.401708	1.80756e-21
BLOC1S4	4p16.1	0.401512	1.89826e-21
EIF5A	17p13.1	0.400878	2.22235e-21
PSMD9	12q24.31	0.400833	2.24713e-21
TRAP1	16p13.3	0.400275	2.58086e-21
CYTOR	2p11.2	0.400255	2.59406e-21
HILPDA	7q32.1	0.399289	3.29457e-21
MRPL21	11q13.3	0.399129	3.42683e-21
NME4	16p13.3	0.398861	3.66188e-21
MCRIP2	16p13.3	0.398646	3.86123e-21
YIF1A	11q13.2	0.398268	4.23785e-21
EMC8	16q24.1	0.397968	4.56222e-21
PA2G4	12q13.2	0.397918	4.61889e-21
MLST8	16p13.3	0.397287	5.39391e-21
SLAMF9	1q23.2	0.396775	6.11411e-21
PSMB5	14q11.2	0.396764	6.13181e-21
COX17	3q13.33	0.396247	6.95871e-21
H2AFZ	4q23	0.395699	7.95585e-21
NEIL3	4q34.3	0.395408	8.53992e-21
SRPRB	3q22.1	0.395041	9.3406e-21
LCMT1	16p12.1	0.393908	1.22999e-20
GMPPA	2q35	0.393744	1.27991e-20
POLR2H	3q27.1	0.393742	1.28075e-20
NHP2	5q35.3	0.392555	1.70651e-20
EIF4EBP1	8p11.23	0.392181	1.86806e-20
B3GNT4	12q24.31	0.391366	2.27326e-20
MRPS12	19q13.2	0.391221	2.35354e-20
C19ORF24	19p13.3	0.390932	2.52309e-20
SLC25A39	17q21.31	0.390882	2.55309e-20
ARPC1A	7q22.1	0.390665	2.68977e-20
NSUN5	7q11.23	0.390611	2.72513e-20
UBE2T	1q32.1	0.390167	3.03103e-20
NUBP2	16p13.3	0.389616	3.45821e-20
TIMM17B	Xp11.23	0.389031	3.97669e-20
ZFPL1	11q13.1	0.38896	4.04424e-20
CD2BP2	16p11.2	0.38863	4.37514e-20
YWHAG	7q11.23	0.388556	4.4534e-20
CCNB1	5q13.2	0.388509	4.50398e-20
CDC20	1p34.2	0.388163	4.89031e-20
METTL5	2q31.1	0.388144	4.91203e-20
MRTO4	1p36.13	0.388131	4.92788e-20
KCTD5	16p13.3	0.388008	5.07432e-20
COX8A	11q13.1	0.387993	5.09205e-20
PAGR1	16p11.2	0.387786	5.34885e-20
COX6A1	12q24.31|12q24.2	0.386791	6.77175e-20
TUBA1B	12q13.12	0.386763	6.81785e-20
CDT1	16q24.3	0.386634	7.02804e-20
LOC388955	2p15	0.386437	7.36348e-20
CTU2	16q24.3	0.386377	7.46931e-20
PCGF1	2p13.1	0.385624	8.92193e-20
MRPL53	2p13.1	0.385417	9.36797e-20
TACO1	17q23.3	0.385367	9.47981e-20
SPP1	4q22.1	0.385175	9.91814e-20
BUD23	7q11.23	0.385033	1.02558e-19
GFER	16p13.3	0.384842	1.07263e-19
GRPEL1	4p16.1	0.384382	1.19519e-19
METTL26	16p13.3	0.383491	1.4729e-19
PSMA5	1p13.3	0.383252	1.55751e-19
SNRPA1	15q26.3	0.383195	1.57856e-19
DAD1	14q11.2	0.382865	1.70509e-19
NOL3	16q22.1	0.382408	1.89704e-19
H2AFX	11q23.3	0.382337	1.92849e-19
RPUSD1	16p13.3	0.381281	2.46556e-19
VDAC1	5q31.1	0.38101	2.62582e-19
EFNA3	1q21.3	0.380816	2.74716e-19
DARS	2q21.3	0.380809	2.75131e-19
HMMR	5q34	0.380431	3.00307e-19
UBC	12q24.31	0.380388	3.03324e-19
LAGE3	Xq28	0.380077	3.26003e-19
PSMB4	1q21.3	0.380052	3.27855e-19
CDCA3	12p13.31	0.379477	3.74498e-19
G6PD	Xq28	0.379309	3.89284e-19
TBRG4	7p13	0.379177	4.01264e-19
NAA10	Xq28	0.379133	4.05399e-19
ZP3	7q11.23	0.379077	4.1071e-19
ASF1B	19p13.12	0.379027	4.15432e-19
DRAP1	11q13.1	0.378818	4.35896e-19
ROMO1	20q11.22	0.378694	4.48573e-19
PHB	17q21.33	0.378638	4.54327e-19
TEDC2	16p13.3	0.378576	4.60867e-19
TMEM208	16q22.1	0.37851	4.67995e-19
UQCRQ	5q31.1	0.378329	4.87869e-19
NME1	17q21.33	0.378282	4.93178e-19
NDUFS6	5p15.33	0.378115	5.12435e-19
RNPS1	16p13.3	0.377102	6.46528e-19
FKBP4	12p13.33	0.376976	6.65384e-19
ARPC3	12q24.11	0.376477	7.45783e-19
EIF3I	1p35.2	0.376177	7.98816e-19
ANAPC11	17q25.3	0.375975	8.36444e-19
GINS2	16q24.1	0.375839	8.62771e-19
ZNRD2	11q13.1	0.375195	9.99074e-19
SEM1	7q21.3	0.374347	1.21131e-18
EIF5AL1	10q22.3	0.374223	1.24596e-18
CYC1	8q24.3	0.373728	1.3936e-18
SNRNP25	16p13.3	0.373693	1.40473e-18
IGFBP3	7p12.3	0.373271	1.54528e-18
ATP5MC3	2q31.1	0.372797	1.71981e-18
COX7B	Xq21.1	0.372777	1.72781e-18
GNB2	7q22.1	0.372715	1.75218e-18
PTTG1	5q33.3	0.372654	1.77647e-18
ZNF768	16p11.2	0.372414	1.87485e-18
CIB1	15q26.1	0.372356	1.89966e-18
STUB1	16p13.3	0.372218	1.95954e-18
RAN	12q24.33	0.371579	2.2627e-18
NDRG1	8q24.22	0.371442	2.33314e-18
HSPE1	2q33.1	0.371394	2.35843e-18
TACC3	4p16.3	0.370972	2.59288e-18
MC1R	16q24.3	0.370892	2.63972e-18
MRPS11	15q25.3	0.370882	2.64522e-18
NUDT1	7p22.3	0.370872	2.6513e-18
MRPL36	5p15.33	0.370807	2.69022e-18
SRM	1p36.22	0.370729	2.73747e-18
AP2S1	19q13.32	0.370371	2.96588e-18
TREML3P	6p21.1	0.370285	3.02397e-18
LSM4	19p13.11	0.369992	3.22872e-18
SQSTM1	5q35.3	0.369924	3.27775e-18
TMSB10	2p11.2	0.369663	3.4743e-18
CENPN	16q23.2	0.369526	3.58222e-18
NOC4L	12q24.33	0.369481	3.61826e-18
GUK1	1q42.13	0.369362	3.7161e-18
CDKN3	14q22.2	0.369065	3.96953e-18
MRPL51	12p13.31	0.369014	4.01553e-18
SEC13	3p25.3	0.368933	4.08838e-18
TSR3	16p13.3	0.368376	4.62785e-18
RNF7	3q23	0.367683	5.3969e-18
CKS1B	1q21.3	0.367604	5.49181e-18
MAZ	16p11.2	0.367395	5.75189e-18
NIT2	3q12.2	0.366839	6.50418e-18
JMJD4	1q42.13	0.366772	6.60173e-18
TOMM40	19q13.32	0.366656	6.77333e-18
PAICS	4q12	0.366627	6.81631e-18
CKS2	9q22.2	0.366536	6.95465e-18
NTMT1	9q34.11	0.366344	7.25546e-18
BCL7C	16p11.2	0.366333	7.27299e-18
COX5B	2q11.2	0.366303	7.32218e-18
MIR4435-2HG	2q13	0.366182	7.52024e-18
FTSJ1	Xp11.23	0.366005	7.81933e-18
PSMD14	2q24.2	0.365884	8.03017e-18
SEMA4B	15q26.1	0.365769	8.23651e-18
ATP6V0C	16p13.3	0.365663	8.42985e-18
MRPL11	11q13.2	0.365382	8.96796e-18
RITA1	12q24.13	0.36495	9.86125e-18
DUSP13	10q22.2	0.36494	9.88223e-18
TSFM	12q14.1	0.364771	1.02558e-17
METTL1	12q14.1	0.364672	1.04799e-17
PSMD7	16q23.1	0.364576	1.07032e-17
TIMMDC1	3q13.33	0.364553	1.07573e-17
UBE2S	19q13.42	0.364357	1.12291e-17
KNOP1	16p12.3	0.364241	1.15174e-17
IMP4	2q21.1	0.363936	1.23137e-17
HPRT1	Xq26.2-q26.3	0.363455	1.36788e-17
MYL6B	12q13.2	0.363419	1.3786e-17
ZNF668	16p11.2	0.363338	1.40333e-17
NUTF2	16q22.1	0.362427	1.71142e-17
KCTD13	16p11.2	0.362382	1.72809e-17
BOLA3	2p13.1	0.362262	1.77402e-17
TMEM219	16p11.2	0.362127	1.82687e-17
BANF1	11q13.1	0.361424	2.1278e-17
SLC25A10	17q25.3	0.361103	2.28121e-17
MRPS22	3q23	0.36086	2.40417e-17
MXD3	5q35.3	0.360551	2.57048e-17
STYXL1	7q11.23	0.360388	2.66237e-17
P4HB	17q25.3	0.360249	2.74372e-17
ADRM1	20q13.33	0.360204	2.77065e-17
THOC3	5q35.2	0.360192	2.77782e-17
STX4	16p11.2	0.360072	2.8506e-17
HNRNPC	14q11.2	0.359769	3.04289e-17
EIPR1	2p25.3	0.359625	3.13907e-17
ATP5PD	17q25.1	0.359524	3.20816e-17
FARSA	19p13.13	0.359152	3.47497e-17
MYBL2	20q13.12	0.359028	3.56927e-17
EXOSC4	8q24.3	0.358694	3.83464e-17
RPA3	7p21.3	0.358688	3.8395e-17
CMC2	16q23.2	0.358483	4.01201e-17
POLD4	11q13.2	0.358419	4.06786e-17
SUV39H1	Xp11.23	0.358396	4.08778e-17
PSMC2	7q22.1	0.358132	4.32562e-17
ZNF593	1p36.11	0.358123	4.3344e-17
KARS	16q23.1	0.358122	4.33504e-17
HNRNPAB	5q35.3	0.358	4.45026e-17
ALYREF	17q25.3	0.357334	5.13188e-17
ORMDL2	12q13.2	0.357273	5.19887e-17
THOC6	16p13.3	0.357112	5.38125e-17
PYCR3	8q24.3	0.356868	5.66819e-17
HSD17B10	Xp11.22	0.356814	5.73376e-17
PSMC3	11p11.2	0.356646	5.94291e-17
PDCD6	5p15.33	0.356363	6.31287e-17
PRR7	5q35.3	0.356338	6.34646e-17
MZT2B	2q21.1	0.356304	6.3918e-17
RPN1	3q21.3	0.355958	6.88095e-17
NMRAL1	16p13.3	0.355624	7.38668e-17
RRM2	2p25.1	0.355302	7.90952e-17
ERI3	1p34.1	0.355302	7.90995e-17
CCT7	2p13.2	0.354618	9.14233e-17
NUP37	12q23.2	0.3546	9.17869e-17
PFDN2	1q23.3	0.353863	1.07248e-16
GEMIN6	2p22.1	0.353676	1.11565e-16
RUVBL2	19q13.33	0.353577	1.13917e-16
ORC6	16q11.2	0.353483	1.16188e-16
NUDCD2	5q34	0.353415	1.17881e-16
MRPL3	3q22.1	0.352961	1.29709e-16
MRPL58	17q25.1	0.352954	1.29898e-16
UQCC3	11q12.3	0.352942	1.30221e-16
AP1S1	7q22.1	0.352839	1.33071e-16
COPZ1	12q13.13	0.352673	1.37785e-16
ABCF3	3q27.1	0.352628	1.39114e-16
PPIH	1p34.2	0.352511	1.42557e-16
DNTTIP1	20q13.12	0.352511	1.4257e-16
CFL1	11q13.1	0.352488	1.43259e-16
MLF2	12p13.31	0.352291	1.49299e-16
CDCA4	14q32.33	0.351952	1.60314e-16
BRI3BP	12q24.31	0.351951	1.60361e-16
LRRC42	1p32.3	0.3519	1.6206e-16
CCT5	5p15.2	0.351292	1.84053e-16
SAC3D1	11q13.1	0.35102	1.94842e-16
TRPT1	11q13.1	0.350862	2.01385e-16
SLIRP	14q24.3	0.350679	2.09214e-16
TRAF7	16p13.3	0.350621	2.11778e-16
FAM71D	14q23.3	0.350579	2.13631e-16
COPE	19p13.11	0.350168	2.32742e-16
VKORC1	16p11.2	0.349969	2.42604e-16
PDAP1	7q22.1	0.349952	2.43434e-16
RNF181	2p11.2	0.349936	2.44259e-16
CENPW	6q22.32	0.349878	2.47203e-16
CHMP1A	16q24.3	0.349742	2.54343e-16
MZT2A	2q21.1	0.349527	2.65951e-16
TBL2	7q11.23	0.349368	2.74899e-16
CINP	14q32.31	0.349295	2.7908e-16
RAD51	15q15.1	0.349183	2.85619e-16
TUBG1	17q21.2	0.349067	2.92598e-16
FTH1	11q12.3	0.348963	2.98981e-16
MFSD5	12q13.13	0.348854	3.05821e-16
ZFAND2A	7p22.3	0.348828	3.07483e-16
MRPS17	7p11.2	0.348772	3.1109e-16
SNRPG	2p13.3	0.348625	3.20656e-16
CENPM	22q13.2	0.348459	3.31885e-16
PFKFB4	3p21.31	0.348003	3.64757e-16
LOXL2	8p21.3	0.347994	3.65399e-16
ECI1	16p13.3	0.34729	4.22578e-16
TRAPPC5	19p13.2	0.347167	4.3345e-16
MRPS15	1p34.3	0.34713	4.36738e-16
C15ORF48	15q21.1	0.346999	4.48734e-16
UQCRC1	3p21.31	0.346954	4.52878e-16
PLEK2	14q23.3-q24.1	0.346285	5.19686e-16
BIRC5	17q25.3	0.346283	5.19899e-16
SF3B5	6q24.2	0.346209	5.27879e-16
SRSF9	12q24.31	0.346182	5.3074e-16
UBL4A	Xq28	0.346129	5.36592e-16
CDC25C	5q31.2	0.345945	5.57266e-16
KCMF1	2p11.2	0.345944	5.57365e-16
C12ORF45	12q23.3	0.345748	5.80176e-16
GSS	20q11.22	0.345672	5.894e-16
COPG1	3q21.3	0.345423	6.20224e-16
HCFC1R1	16p13.3	0.345111	6.61056e-16
MRPL55	1q42.13	0.344902	6.89911e-16
CIAO2B	16q22.1	0.344883	6.92709e-16
MTFR2	6q23.3	0.344757	7.10716e-16
B3GAT3	11q12.3	0.344346	7.7294e-16
RPF2	6q21	0.344249	7.88301e-16
GINS3	16q21	0.344208	7.95016e-16
ACTG1	17q25.3	0.343746	8.73527e-16
PTGES3	12q13.3|12	0.343636	8.93151e-16
NDUFA11	19p13.3	0.343517	9.15162e-16
ATP6V1F	7q32.1	0.343435	9.30563e-16
MPG	16p13.3	0.343141	9.87745e-16
UBE2M	19q13.43	0.342377	1.15332e-15
SNRPF	12q23.1	0.342301	1.17121e-15
SLC50A1	1q22	0.341977	1.25056e-15
MRPL47	3q26.33	0.341828	1.28891e-15
RHOC	1p13.2	0.341506	1.37558e-15
FOPNL	16p13.11	0.341484	1.3816e-15
POLR3K	16p13.3	0.341437	1.39491e-15
COA4	11q13.4	0.341377	1.41176e-15
UBE2C	20q13.12	0.341051	1.50787e-15
UBE2F	2q37.3	0.340969	1.53284e-15
KIAA2013	1p36.22	0.340853	1.56931e-15
RCC1L	7q11.23	0.340665	1.62964e-15
ATOX1	5q33.1	0.340643	1.63698e-15
TAF10	11p15.4	0.340583	1.65678e-15
ATXN2L	16p11.2	0.340239	1.77568e-15
MND1	4q31.3	0.340188	1.79369e-15
CENPH	5q13.2	0.340134	1.81326e-15
TSKU	11q13.5	0.339825	1.92957e-15
CYCS	7p15.3	0.339718	1.9712e-15
SHCBP1	16q11.2	0.339278	2.15317e-15
LONP1	19p13.3	0.338993	2.27976e-15
PSMD2	3q27.1	0.338958	2.29562e-15
PYGL	14q22.1	0.338873	2.33491e-15
PSMG3	7p22.3	0.338423	2.5545e-15
ADM	11p15.4	0.338283	2.62699e-15
PSMD3	17q21.1	0.338267	2.63566e-15
DDX39A	19p13.12	0.338181	2.68135e-15
APEX2	Xp11.21	0.338159	2.69309e-15
TROAP	12q13.12	0.337951	2.80713e-15
SEC61A1	3q21.3	0.337877	2.84869e-15
MRPL24	1q23.1	0.337872	2.8518e-15
NME2	17q21.33	0.337183	3.27097e-15
ARPC1B	7q22.1	0.336926	3.44208e-15
MRPS30	5p12	0.33692	3.44635e-15
HAX1	1q21.3	0.336893	3.46477e-15
C12ORF10	12q13.13	0.336733	3.57656e-15
NUDT22	11q13.1	0.336728	3.58008e-15
HMBS	11q23.3	0.336475	3.76431e-15
PSMD4	1q21.3	0.336408	3.81461e-15
CCNB2	15q22.2	0.33635	3.85902e-15
TMED9	5q35.3	0.336011	4.12695e-15
SEC61B	9q22.33	0.335648	4.43395e-15
SFN	1p36.11	0.335367	4.68752e-15
NDUFB7	19p13.12	0.335336	4.71598e-15
DECR2	16p13.3	0.334979	5.05976e-15
CDC34	19p13.3	0.334975	5.06392e-15
PPP1R35	7q22.1	0.334722	5.32336e-15
TXN	9q31.3	0.333969	6.1727e-15
EIF2B1	12q24.31	0.333801	6.38092e-15
EIF4H	7q11.23	0.333698	6.51025e-15
OIP5	15q15.1	0.333616	6.61584e-15
PSMB1	6q27	0.33359	6.64951e-15
TBL3	16p13.3	0.333564	6.68473e-15
EMG1	12p13.31	0.333179	7.20754e-15
RFC4	3q27.3	0.332779	7.79581e-15
BRMS1	11q13.2	0.332406	8.38548e-15
SDSL	12q24.13	0.331811	9.41716e-15
TXNRD1	12q23.3	0.33178	9.47457e-15
CISD2	4q24	0.331705	9.61381e-15
PCLAF	15q22.31	0.331565	9.87926e-15
PPIAL4C	1q21.2	0.331479	1.00464e-14
COASY	17q21.2	0.331382	1.02391e-14
POC1A	3p21.2	0.331374	1.0254e-14
NDUFA12	12q22	0.331297	1.04091e-14
COX6B1	19q13.12	0.331124	1.07663e-14
ARF5	7q32.1	0.330788	1.14913e-14
GALE	1p36.11	0.330612	1.18912e-14
FAHD1	16p13.3	0.330441	1.22913e-14
PPM1G	2p23.3	0.330441	1.22925e-14
PREB	2p23.3	0.330433	1.23124e-14
EIF6	20q11.22	0.330416	1.23531e-14
PPP1CA	11q13.2	0.33019	1.29052e-14
CCT4	2p15	0.330095	1.31452e-14
CBX4	17q25.3	0.330061	1.32306e-14
DGUOK	2p13.1	0.330055	1.32464e-14
SYNGR4	19q13.33	0.329982	1.3435e-14
DDX56	7p13	0.329942	1.35396e-14
AP2M1	3q27.1	0.329401	1.50334e-14
PSMC1	14q32.11	0.329392	1.50607e-14
TARBP2	12q13.13	0.329108	1.59104e-14
PUSL1	1p36.33	0.328923	1.64874e-14
LYAR	4p16.3	0.328686	1.72596e-14
PQBP1	Xp11.23	0.328435	1.81142e-14
GLRX2	1q31.2	0.328389	1.82739e-14
MAD2L2	1p36.22	0.328312	1.85465e-14
E2F4	16q22.1	0.328164	1.90834e-14
CSTB	21q22.3	0.327804	2.04491e-14
SH3GL1	19p13.3	0.32754	2.15123e-14
KIF2C	1p34.1	0.327488	2.1727e-14
TRAIP	3p21.31	0.327463	2.18345e-14
NOC2L	1p36.33	0.327336	2.23712e-14
ATP5ME	4p16.3	0.327258	2.27089e-14
RDM1	17q12	0.32722	2.2873e-14
CCNQ	Xq28	0.327001	2.38542e-14
CCDC86	11q12.2	0.326211	2.77469e-14
SHMT2	12q13.3	0.326111	2.82829e-14
SKA3	13q12.11	0.326023	2.87594e-14
RANBP1	22q11.21	0.325914	2.93617e-14
YIPF2	19p13.2	0.325901	2.94386e-14
PLP2	Xp11.23	0.325894	2.94762e-14
SPC25	2q24.3	0.325773	3.01656e-14
NOB1	16q22.1	0.325531	3.15881e-14
PSMC4	19q13.2	0.325482	3.18818e-14
BSG	19p13.3	0.325452	3.20643e-14
ATP5MPL	14q32.33	0.325085	3.43887e-14
STC1	8p21.2	0.324878	3.57661e-14
SNRPC	6p21.31	0.324844	3.59958e-14
PSMB6	17p13.2	0.324821	3.61589e-14
RPP25	15q24.2	0.324664	3.72491e-14
POMP	13q12.3	0.32452	3.8285e-14
MRPL18	6q25.3	0.324272	4.01305e-14
NDUFC1	4q31.1	0.324095	4.14967e-14
FAM72D	1q21.1	0.323899	4.30686e-14
CMSS1	3q12.1	0.323836	4.35782e-14
MORF4L2	Xq22.2	0.323798	4.38982e-14
AVEN	15q14	0.323646	4.51751e-14
TMEM53	1p34.1	0.32351	4.6355e-14
TIMM8A	Xq22.1	0.323407	4.72632e-14
NDUFA8	9q33.2	0.323356	4.77261e-14
TEDC1	14q32.33	0.323099	5.01014e-14
MRGBP	20q13.33	0.322989	5.11457e-14
CARD19	9q22.31	0.322909	5.19233e-14
PRICKLE3	Xp11.23	0.32282	5.28075e-14
RNF187	1q42.13	0.322765	5.33552e-14
AIMP2	7p22.1	0.322741	5.35994e-14
MRPL2	6p21.1	0.322651	5.45152e-14
KIF20A	5q31.2	0.322526	5.58122e-14
HTATIP2	11p15.1	0.322449	5.66343e-14
MAD2L1	4q27	0.322265	5.86201e-14
IDH3G	Xq28	0.321791	6.40957e-14
SDHB	1p36.13	0.321611	6.62942e-14
TTC4	1p32.3	0.320909	7.56232e-14
DCTN2	12q13.3	0.320896	7.58098e-14
TRMT112	11q13.1	0.320833	7.67062e-14
FAM72B	1p11.2	0.320801	7.71601e-14
SNRPA	19q13.2	0.320794	7.72643e-14
SPDL1	5q35.1	0.320413	8.29705e-14
PARK7	1p36.23	0.3204	8.31687e-14
CDC45	22q11.21	0.320318	8.44594e-14
ETFB	19q13.41	0.320191	8.64807e-14
BZW1	2q33.1	0.320159	8.70124e-14
ZDHHC12	9q34.11	0.320146	8.72158e-14
CHCHD3	7q32.3-q33	0.320132	8.74381e-14
PRDX1	1p34.1	0.320099	8.79813e-14
CCDC124	19p13.11	0.319929	9.08149e-14
HGS	17q25.3	0.319829	9.2527e-14
PTRH2	17q23.1	0.319824	9.261e-14
PGAM5	12q24.33	0.319725	9.43515e-14
LOC388242	16p11.2	0.319567	9.71626e-14
EXO1	1q43	0.319484	9.86832e-14
RRP1	21q22.3	0.319397	1.00284e-13
PPME1	11q13.4	0.319362	1.00941e-13
ARL6IP4	12q24.31	0.319346	1.01247e-13
TPI1P3	6q22.1	0.319311	1.01908e-13
ZNF622	5p15.1	0.319279	1.0252e-13
SRA1	5q31.3	0.319211	1.03817e-13
TIMM44	19p13.2	0.319197	1.04099e-13
PRC1	15q26.1	0.319096	1.06068e-13
ARL6IP1	16p12.3	0.318988	1.08219e-13
NCAPG	4p15.31	0.318761	1.1288e-13
USP5	12p13.31	0.318739	1.13352e-13
BCL7B	7q11.23	0.318729	1.13555e-13
TMEM223	11q12.3	0.318589	1.16545e-13
CCT3	1q22	0.318565	1.17061e-13
OSGIN1	16q23.3	0.318361	1.21571e-13
PTPRN	2q35	0.318333	1.22221e-13
B4GALT7	5q35.3	0.318095	1.27716e-13
SNF8	17q21.32	0.318088	1.2788e-13
AGTRAP	1p36.22	0.317967	1.30793e-13
FBXO22-AS1	15q24.2	0.317938	1.31487e-13
LRP8	1p32.3	0.317785	1.35284e-13
CCNA2	4q27	0.317687	1.37746e-13
COX4I1	16q24.1	0.317614	1.3963e-13
SIRT6	19p13.3	0.317446	1.44039e-13
H2AFJ	12p12.3	0.317331	1.4713e-13
TNFRSF12A	16p13.3	0.317318	1.47473e-13
ELOC	8q21.11	0.316968	1.57324e-13
WDR74	11q12.3	0.316918	1.58774e-13
SLC52A2	8q24.3	0.316914	1.58881e-13
TALDO1	11p15.5	0.316699	1.65312e-13
THOP1	19p13.3	0.316385	1.75168e-13
UTP11	1p34.3	0.316372	1.75569e-13
NCBP2AS2	3q29	0.316201	1.81202e-13
CENPA	2p23.3	0.316105	1.84435e-13
BCAN	1q23.1	0.316087	1.85051e-13
PLIN3	19p13.3	0.315945	1.89937e-13
MYDGF	19p13.3	0.315715	1.98146e-13
PSME2	14q12	0.315702	1.98608e-13
YKT6	7p13	0.315644	2.00734e-13
BRIX1	5p13.2	0.315329	2.12664e-13
PSMA2	7p14.1	0.315231	2.16524e-13
POLDIP2	17q11.2	0.315111	2.21343e-13
VPS33A	12q24.31	0.315058	2.23519e-13
TIGD5	8q24.3	0.314982	2.26627e-13
B4GALNT1	12q13.3	0.314871	2.31305e-13
CDCA8	1p34.3	0.314788	2.34848e-13
TUBB3	16q24.3	0.314515	2.46865e-13
PPIAL4G	1q21.2	0.31438	2.53038e-13
NDUFA9	12p13.32	0.313986	2.71911e-13
PFDN6	6p21.32	0.313835	2.79505e-13
PSMB7	9q33.3	0.313766	2.8301e-13
S100A11	1q21.3	0.313669	2.88094e-13
SLC3A2	11q12.3	0.31363	2.9013e-13
RNF126	19p13.3	0.313538	2.95027e-13
TMPRSS11E	4q13.2	0.313441	3.00271e-13
DYNLL1	12q24.31	0.313195	3.14031e-13
CDK16	Xp11.3	0.313193	3.1416e-13
PSMD12	17q24.2	0.31304	3.2304e-13
NPM1	5q35.1	0.312741	3.41075e-13
ARF1	1q42.13	0.312702	3.4345e-13
POLA2	11q13.1	0.312605	3.49579e-13
UMPS	3q21.2	0.312508	3.55765e-13
CDC6	17q21.2	0.312222	3.7473e-13
COQ9	16q21	0.311956	3.93216e-13
PUS1	12q24.33	0.311776	4.06259e-13
SRXN1	20p13	0.311668	4.14296e-13
NEDD8	14q12	0.311619	4.17962e-13
FLAD1	1q21.3	0.311494	4.27499e-13
NUDC	1p36.11	0.311342	4.39407e-13
RCCD1	15q26.1	0.311179	4.52534e-13
RAD54L	1p34.1	0.311032	4.64709e-13
SGTA	19p13.3	0.310962	4.70607e-13
HJURP	2q37.1	0.310825	4.82351e-13
WDR53	3q29	0.310821	4.8274e-13
C5ORF46	5q32	0.310785	4.85883e-13
HSPD1	2q33.1	0.310606	5.01794e-13
NDUFB3	2q33.1	0.310337	5.26698e-13
STOML2	9p13.3	0.310283	5.3185e-13
BNIP1	5q35.1	0.310259	5.34107e-13
C19ORF48	19q13.33	0.310155	5.44284e-13
SMUG1	12q13.13	0.310051	5.54557e-13
CYREN	7q33	0.309946	5.6505e-13
HEBP2	6q24.1	0.309896	5.70124e-13
TMEM186	16p13.2	0.309836	5.76312e-13
NDUFC2	11q14.1	0.309685	5.92154e-13
GALK1	17q25.1	0.309486	6.13771e-13
LIPK	10q23.31	0.309284	6.36334e-13
C4ORF48	4p16.3	0.309282	6.36636e-13
RNF40	16p11.2	0.309264	6.38641e-13
AURKB	17p13.1	0.309228	6.42739e-13
MRPL13	8q24.12	0.309221	6.4354e-13
VDAC2	10q22.2	0.309036	6.65251e-13
PGAM4	Xq21.1	0.308859	6.86718e-13
CHCHD10	22q11.23	0.308704	7.06017e-13
PSMA7	20q13.33	0.308523	7.29177e-13
MCRS1	12q13.12	0.30851	7.30944e-13
PNP	14q11.2	0.308436	7.40599e-13
STAMBP	2p13.1	0.308419	7.42951e-13
YDJC	22q11.21	0.308239	7.67177e-13
PSMA6	14q13.2	0.308193	7.7353e-13
RPS2	16p13.3	0.308154	7.78908e-13
FGF11	17p13.1	0.307877	8.18363e-13
NSDHL	Xq28	0.307872	8.1901e-13
FARSB	2q36.1	0.307826	8.25834e-13
MICOS13	19p13.3	0.307684	8.47061e-13
ADSSL1	14q32.33	0.307495	8.76051e-13
AUNIP	1p36.11	0.307488	8.76998e-13
FUCA2	6q24.2	0.306899	9.73901e-13
PIMREG	17p13.2	0.306838	9.84472e-13
CNPY2	12q13.3	0.30673	1.00352e-12
SCNM1	1q21.3	0.306586	1.02952e-12
AHSA1	14q24.3	0.306504	1.04464e-12
ZC3HC1	7q32.2	0.306482	1.04867e-12
GSTZ1	14q24.3	0.306438	1.05695e-12
SIGMAR1	9p13.3	0.30639	1.06592e-12
GBAP1	1q22	0.30635	1.07351e-12
PANX2	22q13.33	0.306343	1.07483e-12
TMUB1	7q36.1	0.306224	1.09773e-12
SPHK1	17q25.1	0.306196	1.10317e-12
CDK1	10q21.2	0.306122	1.11788e-12
EME1	17q21.33	0.306085	1.12517e-12
PGD	1p36.22	0.305785	1.18651e-12
DDX49	19p13.11	0.30562	1.22169e-12
GOT2	16q21	0.305602	1.22563e-12
MRPS7	17q25.1	0.305461	1.2564e-12
TRIAP1	12q24.31	0.305448	1.25938e-12
ZNF598	16p13.3	0.305418	1.26606e-12
CENPX	17q25.3	0.305135	1.33093e-12
TIMM10	11q12.1	0.304839	1.40219e-12
RRP9	3p21.2	0.304736	1.42793e-12
C17ORF58	17q24.2	0.304641	1.452e-12
S100A9	1q21.3	0.304609	1.46013e-12
ABCF2	7q36.1	0.304591	1.46487e-12
PDF	16q22.1	0.304372	1.52225e-12
ATIC	2q35	0.304247	1.55614e-12
ATP5MC2	12q13.13	0.304226	1.562e-12
POLE4	2p12	0.304172	1.57683e-12
DDIT4	10q22.1	0.304018	1.62002e-12
HHIPL2	1q41	0.30399	1.62811e-12
CDCA5	11q13.1	0.303967	1.63472e-12
KIF4A	Xq13.1	0.30393	1.64543e-12
MCM2	3q21.3	0.303899	1.65441e-12
S100A10	1q21.3	0.303871	1.66242e-12
AUP1	2p13.1	0.303821	1.67709e-12
MRPL9	1q21.3	0.303732	1.70347e-12
GPS1	17q25.3	0.303635	1.73276e-12
ATAD3A	1p36.33	0.303466	1.78485e-12
STX1A	7q11.23	0.303429	1.79662e-12
MYL6	12q13.2	0.303254	1.85251e-12
SPNS1	16p11.2	0.303247	1.85473e-12
ALDOC	17q11.2	0.303043	1.92232e-12
LINC00467	1q32.3	0.303035	1.92472e-12
B4GALT2	1p34.1	0.302687	2.04566e-12
RHOV	15q15.1	0.302647	2.06016e-12
CSNK2B	6p21.33	0.302568	2.08849e-12
CHKB-DT	22q13.33	0.302495	2.11539e-12
EMD	Xq28	0.302442	2.13532e-12
PYM1	12q13.2	0.302409	2.1476e-12
ATP5F1B	12q13.3	0.302391	2.15405e-12
KISS1R	19p13.3	0.30238	2.15838e-12
EIF3B	7p22.3	0.302331	2.17686e-12
DDOST	1p36.12	0.302221	2.21926e-12
LYPD3	19q13.31	0.302218	2.22024e-12
CDIPT	16p11.2	0.30196	2.3223e-12
TNIP2	4p16.3	0.301886	2.35269e-12
FBXL19	16p11.2	0.301881	2.35457e-12
AAMP	2q35	0.301657	2.44841e-12
FEN1	11q12.2	0.301575	2.48338e-12
RUVBL1	3q21.3	0.30157	2.48552e-12
HSF1	8q24.3	0.301415	2.5535e-12
STC2	5q35.2	0.301303	2.60404e-12
ESPL1	12q13.13	0.301121	2.68728e-12
DUSP23	1q23.2	0.300981	2.75371e-12
PRDX2	19p13.13	0.300955	2.76615e-12
PSMC5	17q23.3	0.300935	2.77555e-12
LMAN2	5q35.3	0.300898	2.79348e-12
CBX8	17q25.3	0.300715	2.88352e-12
COA8	14q32.33	0.300628	2.92779e-12
CCDC137	17q25.3	0.300616	2.93388e-12
CTSV	9q22.33	0.300429	3.0306e-12
EIF4A3	17q25.3	0.300207	3.14895e-12
ORC1	1p32.3	0.300147	3.18206e-12
SWI5	9q34.11	0.300102	3.20708e-12
SMIM12	1p34.3	0.299851	3.3489e-12
EEF2KMT	16p13.3	0.299834	3.35913e-12
ZWINT	10q21.1	0.299753	3.40634e-12
GLA	Xq22.1	0.299692	3.44226e-12
ISOC2	19q13.42	0.299684	3.44707e-12
AKR1B15	7q33	0.29959	3.50395e-12

## Sheet: FBP1 correlated molecules
Supplementary Table 2
Genes correlated to ALDOA and FBP1 expression of LUAD in the TCGA (Firehose Legacy dataset).
Correlated Gene	Cytoband	Spearman's Correlation	p-Value
ZFR	5p13.3	-0.299573	3.514e-12
LEO1	15q21.2	-0.299929	3.3043e-12
MAGEA11	Xq28	-0.300007	3.26014e-12
CEP128	14q31.1	-0.300179	3.16456e-12
SLC35E3	12q15	-0.30021	3.14753e-12
MPHOSPH10	2p13.3	-0.300336	3.07936e-12
PDK1	2q31.1	-0.300371	3.06094e-12
LYPD3	19q13.31	-0.300393	3.04926e-12
TMEM189	20q13.13	-0.300404	3.04372e-12
CUL2	10p11.21	-0.300562	2.96148e-12
CDK12	17q12	-0.300671	2.90587e-12
FGF12	3q28-q29	-0.300983	2.75291e-12
TMEFF1	9q31.1	-0.301064	2.71434e-12
PTGES3	12q13.3|12	-0.301158	2.67031e-12
CSRP2	12q21.2	-0.301171	2.66439e-12
MED20	6p21.1	-0.301344	2.58512e-12
HLTF	3q24	-0.301408	2.55662e-12
TRAIP	3p21.31	-0.301514	2.51013e-12
MAGEC1	Xq27.2	-0.301616	2.46591e-12
ARL6IP6	2q23.3	-0.301628	2.4607e-12
PDIA4	7q36.1	-0.301748	2.40963e-12
SNRPB	20p13	-0.301874	2.35764e-12
GAST	17q21.2	-0.302116	2.25994e-12
ADAMTS20	12q12	-0.302297	2.18991e-12
ATP2A2	12q24.11	-0.302331	2.17703e-12
TWNK	10q24.31	-0.302342	2.17264e-12
SPANXB1	Xq27.1	-0.302424	2.14198e-12
EDC3	15q24.1	-0.302527	2.1035e-12
ANKRD52	12q13.3	-0.302593	2.07957e-12
DBF4B	17q21.31|17q21	-0.302717	2.03485e-12
MPHOSPH6	16q23.3	-0.302774	2.0147e-12
RIPPLY2	6q14.2	-0.302816	2.00023e-12
IL11	19q13.42	-0.30285	1.9883e-12
ARHGEF39	9p13.3	-0.303018	1.93075e-12
ATXN7L3B	12q21.1	-0.303165	1.88144e-12
DRP2	Xq22.1	-0.303203	1.86923e-12
SAPCD2	9q34.3	-0.303648	1.72872e-12
SCML2	Xp22.13	-0.303792	1.68577e-12
PSME3	17q21.31	-0.303819	1.6776e-12
FAM222A	12q24.11	-0.303848	1.6691e-12
CALU	7q32.1	-0.303909	1.65148e-12
RTTN	18q22.2	-0.304019	1.6198e-12
COPS8	2q37.3	-0.30407	1.60541e-12
STEAP1B	7p15.3	-0.304076	1.60382e-12
SMNDC1	10q25.2	-0.304091	1.59944e-12
RPRD1B	20q11.23	-0.30427	1.54995e-12
AGO2	8q24.3	-0.304393	1.5167e-12
HBS1L	6q23.3	-0.304448	1.5021e-12
LAMC1	1q25.3	-0.304561	1.47253e-12
TWF1	12q12	-0.304814	1.40827e-12
MYO19	17q12	-0.304843	1.4012e-12
IPO5	13q32.2	-0.305047	1.35166e-12
ADIPOR2	12p13.33	-0.305208	1.31375e-12
LINC00473	6q27	-0.305336	1.28448e-12
MAGEA1	Xq28	-0.305378	1.27493e-12
BAG2	6p12.1	-0.305391	1.27197e-12
DDOST	1p36.12	-0.305405	1.26884e-12
HOXD10	2q31.1	-0.305433	1.26258e-12
LINC00887	3q29	-0.30546	1.25674e-12
CCDC150	2q33.1	-0.305615	1.22266e-12
U2AF2	19q13.42	-0.305675	1.20988e-12
EXTL2	1p21.2	-0.305676	1.20956e-12
DTYMK	2q37.3	-0.305773	1.18903e-12
NOCT	4q31.1	-0.305795	1.18452e-12
MRPL47	3q26.33	-0.305881	1.16661e-12
C10ORF12	10q24.1	-0.305903	1.16196e-12
RNF24	20p13	-0.305957	1.15103e-12
GAL	11q13.2	-0.306014	1.13946e-12
TFG	3q12.2	-0.306187	1.10499e-12
LEMD3	12q14.3	-0.30628	1.08696e-12
FEM1B	15q23	-0.30638	1.06796e-12
UCN2	3p21.31	-0.306607	1.0258e-12
ZNF260	19q13.12	-0.306662	1.01578e-12
SH2D5	1p36.12	-0.306914	9.71305e-13
CMSS1	3q12.1	-0.306932	9.68284e-13
UBE2C	20q13.12	-0.306959	9.63574e-13
LIN28B	6q16.3-q21	-0.307152	9.31034e-13
TACC3	4p16.3	-0.307173	9.27575e-13
IPO8	12p11.21	-0.307189	9.25058e-13
RACGAP1P	12q12	-0.307235	9.17397e-13
NOP58	2q33.1	-0.30725	9.1497e-13
SLC33A1	3q25.31	-0.307299	9.07132e-13
KLHL42	12p11.22	-0.307423	8.87253e-13
STK35	20p13	-0.308052	7.93195e-13
B3GALNT2	1q42.3	-0.308065	7.91341e-13
SENP2	3q27.2	-0.308125	7.82914e-13
CRY1	12q23.3	-0.308291	7.60108e-13
PDCD11	10q24.33	-0.308758	6.99206e-13
INHA	2q35	-0.308807	6.93166e-13
PPAT	4q12	-0.308972	6.72897e-13
ARTN	1p34.1	-0.309327	6.31485e-13
CDK8	13q12.13	-0.309412	6.21893e-13
AAGAB	15q23	-0.309434	6.19457e-13
TRMT61B	2p23.2	-0.309774	5.82784e-13
HIST1H2BO	6p22.1	-0.309911	5.68687e-13
OTX1	2p15	-0.310143	5.45404e-13
PREB	2p23.3	-0.310153	5.44425e-13
ZNF507	19q13.11	-0.310257	5.34357e-13
FOXD1	5q13.2	-0.310275	5.32571e-13
FANCA	16q24.3	-0.310594	5.02854e-13
NCL	2q37.1	-0.310741	4.89724e-13
C2ORF69	2q33.1	-0.311177	4.52732e-13
BRCA2	13q13.1	-0.31118	4.52444e-13
CPA4	7q32.2	-0.311191	4.51553e-13
SPANXA2	Xq27.2	-0.311417	4.33478e-13
DDX21	10q22.1	-0.311606	4.18941e-13
PFDN4	20q13.2	-0.311634	4.16814e-13
SART3	12q23.3	-0.311749	4.08274e-13
CCDC58	3q21.1	-0.311778	4.06111e-13
USP10	16q24.1	-0.312287	3.70344e-13
ZNF367	9q22.32|9q22.32	-0.312926	3.29768e-13
MFSD2B	2p23.3	-0.313292	3.08532e-13
PNO1	2p14	-0.313361	3.04704e-13
SINHCAF	12p11.21	-0.313392	3.02994e-13
RNGTT	6q15	-0.313525	2.95728e-13
LMAN1	18q21.32	-0.313561	2.93817e-13
ASB1	2q37.3	-0.313859	2.78282e-13
CDC5L	6p21.1	-0.31413	2.64842e-13
LIN9	1q42.12	-0.314305	2.56501e-13
ARNTL2	12p11.23	-0.314373	2.53351e-13
STC1	8p21.2	-0.314494	2.47803e-13
SUDS3	12q24.23	-0.314501	2.47481e-13
DHX37	12q24.31	-0.314505	2.47288e-13
LOC399815	10q26.13	-0.31455	2.45269e-13
CHAF1B	21q22.12-q22.13	-0.314749	2.36528e-13
LZIC	1p36.22	-0.314753	2.36333e-13
ZW10	11q23.2	-0.314823	2.33329e-13
GMEB1	1p35.3	-0.314836	2.32769e-13
POLR1A	2p11.2	-0.314948	2.28051e-13
YY1	14q32.2	-0.314968	2.27215e-13
NRAS	1p13.2	-0.315054	2.23669e-13
SLC39A14	8p21.3	-0.315206	2.17537e-13
PDHX	11p13	-0.315211	2.17332e-13
WDCP	2p23.3	-0.315224	2.16818e-13
SP9	2q31.1	-0.315312	2.13322e-13
CBX2	17q25.3	-0.315433	2.08657e-13
YES1	18p11.32	-0.315468	2.07315e-13
HIST1H3B	6p22.2	-0.315544	2.04451e-13
FANCG	9p13.3	-0.315898	1.91596e-13
EIF4A3	17q25.3	-0.31612	1.83909e-13
PTPRN	2q35	-0.316335	1.76794e-13
SPECC1	17p11.2	-0.316338	1.76676e-13
SELENOV	19q13.2	-0.31637	1.7564e-13
HSF2BP	21q22.3	-0.316438	1.73468e-13
RBM28	7q32.1	-0.316732	1.64318e-13
EIF2S1	14q23.3	-0.317239	1.49648e-13
ATF1	12q13.12	-0.317471	1.43352e-13
OLA1	2q31.1	-0.317546	1.41395e-13
PPP1CC	12q24.11	-0.317587	1.4032e-13
TDP1	14q32.11	-0.317725	1.36793e-13
CTDSPL2	15q15.3-q21.1	-0.317736	1.36516e-13
FAM111B	11q12.1	-0.317918	1.31977e-13
MMADHC	2q23.2	-0.318022	1.29464e-13
SUPT16H	14q11.2	-0.318078	1.28117e-13
HOXD13	2q31.1	-0.318369	1.2139e-13
UTP20	12q23.2	-0.318472	1.19107e-13
PSRC1	1p13.3	-0.318604	1.1621e-13
MRPL30	2q11.2	-0.318677	1.14665e-13
BUB3	10q26.13	-0.318685	1.14478e-13
CWC22	2q31.3	-0.318688	1.14415e-13
BCL2L10	15q21.2	-0.318726	1.1362e-13
DSP	6p24.3	-0.318978	1.08423e-13
PTPN11	12q24.13	-0.31899	1.08187e-13
EGLN3	14q13.1	-0.319334	1.01473e-13
USP37	2q35	-0.319385	1.00511e-13
PPP3R1	2p14	-0.319416	9.99327e-14
C1QL4	12q13.12	-0.319454	9.92353e-14
POP1	8q22.2	-0.319482	9.872e-14
PPM1G	2p23.3	-0.319517	9.80627e-14
SMC3	10q25.2	-0.319545	9.75579e-14
MCM7	7q22.1	-0.319565	9.71972e-14
DSN1	20q11.23	-0.319574	9.70369e-14
SLC39A6	18q12.2	-0.31959	9.67484e-14
DNAJC14	12q13.2	-0.319615	9.63002e-14
MZT1	13q21.33	-0.319622	9.61678e-14
CEP97	3q12.3	-0.319965	9.02136e-14
DCAF17	2q31.1	-0.320128	8.75039e-14
SLC7A1	13q12.3	-0.320179	8.66758e-14
CRNKL1	20p11.23	-0.320246	8.56043e-14
AGPAT5	8p23.1	-0.320307	8.46363e-14
CEBPZ	2p22.2	-0.320455	8.23205e-14
HSP90AA1	14q32.31	-0.320492	8.17565e-14
NUDCD1	8q23.1	-0.320496	8.16995e-14
SSRP1	11q12.1	-0.320572	8.05364e-14
STXBP5	6q24.3	-0.321019	7.40743e-14
SAAL1	11p15.1	-0.321024	7.40093e-14
TTL	2q14.1	-0.321097	7.30095e-14
CDH24	14q11.2	-0.321158	7.21707e-14
PHGDH	1p12	-0.321239	7.10922e-14
RBM12	20q11.22	-0.321277	7.05824e-14
GANAB	11q12.3	-0.321315	7.00808e-14
GPN1	2p23.3	-0.321403	6.89273e-14
MARK1	1q41	-0.321471	6.80646e-14
SERBP1	1p31.3	-0.321675	6.55013e-14
ZNF384	12p13.31	-0.321733	6.47905e-14
TAF11	6p21.31	-0.321896	6.28344e-14
UBXN2A	2p23.3	-0.322126	6.01747e-14
CEP89	19q13.11	-0.322174	5.96355e-14
EIF3J	15q21.1	-0.322361	5.75783e-14
BRIP1	17q23.2	-0.322607	5.49676e-14
PGAM5	12q24.33	-0.322643	5.45938e-14
WBP11	12p12.3	-0.322965	5.13767e-14
LSM14A	19q13.11	-0.323101	5.00756e-14
SERPINB5	18q21.33	-0.32315	4.96139e-14
FARSB	2q36.1	-0.32335	4.77739e-14
PKN2	1p22.2	-0.323493	4.65036e-14
FAM136A	2p13.3	-0.323682	4.48689e-14
UBE2G1	17p13.2	-0.324027	4.20368e-14
GTPBP4	10p15.3	-0.324113	4.13545e-14
RCN2	15q24.3	-0.324329	3.96974e-14
RPE	2q34	-0.325026	3.47776e-14
PSMC4	19q13.2	-0.325027	3.47701e-14
NDUFS1	2q33.3	-0.325173	3.38136e-14
INA	10q24.33	-0.325198	3.36547e-14
GINS3	16q21	-0.325749	3.03032e-14
ZNF639	3q26.33	-0.326	2.88879e-14
PSMD12	17q24.2	-0.32632	2.71753e-14
DHX9	1q25.3	-0.326398	2.67742e-14
NUP155	5p13.2	-0.326546	2.60237e-14
TRIM28	19q13.43	-0.326846	2.45745e-14
CCT6A	7p11.2	-0.326933	2.41685e-14
CEBPG	19q13.11	-0.327257	2.27112e-14
DKC1	Xq28	-0.327576	2.13655e-14
TSR1	17p13.3	-0.327612	2.12179e-14
TRIP12	2q36.3	-0.327706	2.08378e-14
HEATR1	1q43	-0.327962	1.98398e-14
RECQL	12p12.1	-0.328323	1.85072e-14
SHCBP1	16q11.2	-0.3284	1.82345e-14
NOLC1	10q24.32	-0.328437	1.81069e-14
NUP205	7q33	-0.328444	1.80812e-14
DONSON	21q22.11	-0.328537	1.77612e-14
CENPH	5q13.2	-0.328627	1.74564e-14
DNMT3A	2p23.3	-0.328676	1.7292e-14
UBXN4	2q21.3	-0.328967	1.63463e-14
DDX47	12p13.1	-0.328978	1.63124e-14
EZH2	7q36.1	-0.329235	1.55223e-14
ANAPC7	12q24.11	-0.329368	1.51308e-14
MGME1	20p11.23	-0.329592	1.44881e-14
KCTD3	1q41	-0.32975	1.40534e-14
SEPHS1	10p13	-0.329834	1.3825e-14
CKAP5	11p11.2	-0.330035	1.32984e-14
HMGXB4	22q12.3	-0.330487	1.21819e-14
ABCF1	6p21.33	-0.330508	1.21325e-14
TRA2B	3q27.2	-0.330724	1.16344e-14
GSK3B	3q13.33	-0.330804	1.14555e-14
MPHOSPH9	12q24.31	-0.331346	1.03112e-14
KPNA1	3q21.1	-0.331707	9.60981e-15
ATAD2	8q24.13	-0.331802	9.43361e-15
GCN1	12q24.23	-0.332551	8.15062e-15
URB2	1q42.13	-0.332728	7.87393e-15
BORA	13q21.33	-0.33306	7.37885e-15
BYSL	6p21.1	-0.333392	6.91365e-15
RUVBL1	3q21.3	-0.33366	6.55926e-15
CEP76	18p11.21	-0.333805	6.37548e-15
TARS	5p13.3	-0.333816	6.36169e-15
GFM1	3q25.32	-0.334343	5.73604e-15
SMO	7q32.1	-0.334351	5.72615e-15
MCM3	6p12.2	-0.334494	5.56817e-15
RBL1	20q11.23	-0.334675	5.37286e-15
SLC30A6	2p22.3	-0.334743	5.30109e-15
AGFG1	2q36.3	-0.334844	5.19645e-15
HMMR	5q34	-0.334977	5.06196e-15
PRMT5	14q11.2	-0.335047	4.99312e-15
MAPRE1	20q11.21	-0.335076	4.96464e-15
RFWD3	16q23.1	-0.335318	4.73291e-15
TAF1A	1q41	-0.335328	4.72326e-15
ZNF770	15q14	-0.335513	4.55404e-15
LINC01600	6p25.2	-0.335706	4.38391e-15
AURKAP1	1q41	-0.335754	4.34241e-15
G2E3	14q12	-0.336094	4.05968e-15
ZNF697	1p12	-0.336112	4.04476e-15
PLOD2	3q24	-0.336244	3.941e-15
INHBE	12q13.3	-0.336259	3.92926e-15
CCNE1	19q12	-0.336344	3.86361e-15
DCLRE1A	10q25.3	-0.336626	3.6532e-15
DHX57	2p22.1	-0.336799	3.52989e-15
CENPU	4q35.1	-0.33689	3.46686e-15
LMNB2	19p13.3	-0.337049	3.35902e-15
SLC7A11	4q28.3	-0.337185	3.26973e-15
MASTL	10p12.1	-0.337599	3.01072e-15
ERLIN1	10q24.31	-0.3376	3.01035e-15
STAG1	3q22.3	-0.337932	2.8178e-15
GCLC	6p12.1	-0.338171	2.68666e-15
MPP6	7p15.3	-0.338399	2.5672e-15
CABYR	18q11.2	-0.33874	2.39778e-15
POLR3F	20p11.23	-0.339184	2.19392e-15
PSMD2	3q27.1	-0.339273	2.15519e-15
DIP2B	12q13.12	-0.339332	2.12982e-15
SPC24	19p13.2	-0.339406	2.0986e-15
CCT4	2p15	-0.339598	2.01941e-15
U2SURP	3q23	-0.339798	1.94012e-15
DEK	6p22.3	-0.339858	1.91693e-15
GABRQ	Xq28	-0.339938	1.88617e-15
RPL7L1	6p21.1	-0.33998	1.87022e-15
MIR924HG	18q12.2-q12.3	-0.340014	1.8576e-15
CKS1B	1q21.3	-0.34024	1.77519e-15
NEIL3	4q34.3	-0.340564	1.66314e-15
SNRNP200	2q11.2	-0.340624	1.64326e-15
ZNF8	19q13.43	-0.340699	1.61854e-15
SLC7A5	16q24.2	-0.341067	1.50282e-15
GTF3C2	2p23.3	-0.341355	1.41821e-15
NEDD1	12q23.1	-0.341875	1.27681e-15
DHX33	17p13.2	-0.341897	1.27113e-15
DDX18	2q14.1	-0.342121	1.21472e-15
SLC6A17	1p13.3	-0.342152	1.20706e-15
CDCA4	14q32.33	-0.342244	1.18486e-15
PGM3	6q14.1	-0.342444	1.13778e-15
NFXL1	4p12	-0.342557	1.11207e-15
CKAP2	13q14.3	-0.342656	1.08995e-15
E2F2	1p36.12	-0.34272	1.07595e-15
C15ORF41	15q14	-0.343034	1.00955e-15
NEMP1	12q13.3	-0.343046	1.007e-15
CHORDC1	11q14.3	-0.343097	9.96705e-16
KPNA4	3q25.33	-0.343312	9.53967e-16
SPATA5	4q28.1	-0.343368	9.433e-16
PWP1	12q23.3	-0.343477	9.22562e-16
WDR62	19q13.12	-0.34366	8.889e-16
KIF3B	20q11.21	-0.344523	7.45549e-16
ADAM17	2p25.1	-0.344816	7.02192e-16
VTA1	6q24.1-q24.2	-0.344838	6.99108e-16
DBF4	7q21.12	-0.344921	6.87211e-16
TET1	10q21.3	-0.345373	6.26576e-16
ITGB1	10p11.22	-0.34572	5.83585e-16
FANCD2	3p25.3	-0.345744	5.80755e-16
SMOX	20p13	-0.345748	5.80249e-16
PRKDC	8q11.21	-0.345956	5.55957e-16
ALG10	12p11.1	-0.346418	5.05699e-16
GTF2H3	12q24.31	-0.346538	4.93304e-16
C19ORF48	19q13.33	-0.346659	4.81178e-16
TMEM185B	2q14.2	-0.346903	4.5764e-16
TBCCD1	3q27.3	-0.346964	4.5191e-16
PRKAA2	1p32.2	-0.347115	4.38121e-16
NAB1	2q32.2	-0.347137	4.36095e-16
TFAM	10q21.1	-0.347139	4.35919e-16
TCP1	6q25.3	-0.347229	4.27946e-16
TTI1	20q11.23	-0.347328	4.1931e-16
SLC2A1	1p34.2	-0.347502	4.04479e-16
NAA25	12q24.13	-0.347612	3.95448e-16
LRRC42	1p32.3	-0.347682	3.89747e-16
FXR1	3q26.33	-0.347702	3.88171e-16
MTFR2	6q23.3	-0.347844	3.7692e-16
PUS7L	12q12	-0.347873	3.74689e-16
NCAPD3	11q25	-0.348184	3.51309e-16
USP1	1p31.3	-0.348198	3.50339e-16
MRPL42	12q22	-0.348294	3.43409e-16
PSMC3IP	17q21.2	-0.348411	3.3521e-16
RAE1	20q13.31	-0.348933	3.00845e-16
DNAJC9	10q22.2	-0.348951	2.99731e-16
GINS2	16q24.1	-0.349215	2.83776e-16
CASC15	6p22.3	-0.349327	2.77214e-16
B4GALT4	3q13.32	-0.349408	2.72623e-16
DNAJB4	1p31.1	-0.34947	2.69128e-16
ARL5B	10p12.31	-0.349525	2.66081e-16
SPDL1	5q35.1	-0.349583	2.62883e-16
BARD1	2q35	-0.349617	2.60998e-16
LSG1	3q29	-0.349652	2.59132e-16
MSI2	17q22	-0.34998	2.42022e-16
TYMS	18p11.32	-0.350334	2.24836e-16
MEST	7q32.2	-0.350451	2.19419e-16
MIB1	18q11.2	-0.350476	2.18254e-16
PAPOLA	14q32.2	-0.350515	2.16483e-16
HMGA1	6p21.31	-0.350651	2.10439e-16
YWHAQ	2p25.1	-0.350737	2.06686e-16
IMMT	2p11.2|2	-0.350765	2.05494e-16
MTBP	8q24.12	-0.350969	1.96922e-16
NUP37	12q23.2	-0.351059	1.93239e-16
RRM1	11p15.4	-0.351314	1.83239e-16
GBX2	2q37.2	-0.351388	1.80394e-16
LMNB1	5q23.2	-0.351684	1.69571e-16
MRPL35	2p11.2	-0.35188	1.62764e-16
XRCC2	7q36.1	-0.352149	1.53822e-16
RPAP3	12q13.11	-0.352438	1.44785e-16
TPRKB	2p13.1	-0.352652	1.3841e-16
UBE2S	19q13.42	-0.35273	1.36168e-16
KPNB1	17q21.32	-0.353086	1.26342e-16
ORC2	2q33.1	-0.353341	1.19731e-16
SRGAP1	12q14.2	-0.3542	9.98782e-17
NAA15	4q31.1	-0.354665	9.05237e-17
AGO3	1p34.3	-0.354694	8.99763e-17
B4GALT6	18q12.1	-0.354838	8.72752e-17
CCT2	12q15	-0.354995	8.44084e-17
CEP55	10q23.33	-0.355058	8.32973e-17
UBE2E3	2q31.3	-0.35534	7.84551e-17
KIF3C	2p23.3	-0.355427	7.70183e-17
SBNO1	12q24.31	-0.355661	7.32955e-17
TRIP13	5p15.33	-0.355667	7.32009e-17
STMN1	1p36.11	-0.35603	6.77603e-17
PLEKHH1	14q24.1	-0.35613	6.63372e-17
EIF2S2	20q11.22	-0.356337	6.34752e-17
CENPW	6q22.32	-0.356391	6.27527e-17
ATP13A3	3q29	-0.356426	6.22879e-17
CDT1	16q24.3	-0.356455	6.18977e-17
CCDC77	12p13.33	-0.356628	5.96534e-17
STC2	5q35.2	-0.356708	5.86489e-17
GNG4	1q42.3	-0.357143	5.34544e-17
UBE2T	1q32.1	-0.357262	5.21056e-17
SUZ12	17q11.2	-0.357285	5.18587e-17
KIAA1549	7q34	-0.357459	4.99664e-17
HSPA13	21q11.2	-0.357608	4.83984e-17
AKIRIN1	1p34.3	-0.357881	4.56458e-17
EEF1E1	6p24.3	-0.358266	4.20308e-17
HSP90B1	12q23.3	-0.358277	4.19385e-17
UGGT1	2q14.3	-0.358399	4.08532e-17
COA7	1p32.3	-0.358437	4.05197e-17
TAF2	8q24.12	-0.358669	3.85514e-17
MAPK8	10q11.22	-0.358845	3.71213e-17
SAMD4B	19q13.2	-0.358855	3.70473e-17
TUBB	6p21.33	-0.359005	3.5871e-17
KHDRBS1	1p35.2	-0.359291	3.37265e-17
FANCM	14q21.2	-0.359344	3.3347e-17
ADA	20q13.12	-0.359708	3.08296e-17
INTS13	12p11.23	-0.360155	2.79972e-17
VRK1	14q32.2	-0.360219	2.76121e-17
SAE1	19q13.32	-0.360269	2.73212e-17
PRTFDC1	10p12.1	-0.360392	2.66027e-17
IGF2BP1	17q21.32	-0.360465	2.61853e-17
KCMF1	2p11.2	-0.360657	2.51209e-17
SKIL	3q26.2	-0.360854	2.40742e-17
GABPB1	15q21.2	-0.361177	2.24478e-17
SFPQ	1p34.3	-0.361198	2.23467e-17
DNMT3B	20q11.21	-0.361578	2.05801e-17
KIF4B	5q33.2	-0.361917	1.91207e-17
TNPO1	5q13.2	-0.362452	1.70194e-17
DTL	1q32.3	-0.362588	1.65241e-17
CENPL	1q25.1	-0.36293	1.53374e-17
CENPK	5q12.3	-0.363865	1.2505e-17
TTPAL	20q13.12	-0.364096	1.18907e-17
GINS4	8p11.21	-0.364114	1.18417e-17
LARP6	15q23	-0.364254	1.14855e-17
TMEM117	12q12	-0.364751	1.02995e-17
LRPPRC	2p21	-0.364837	1.01078e-17
MAP4K4	2q11.2	-0.36573	8.30592e-18
ANLN	7p14.2	-0.365737	8.29434e-18
LRP12	8q22.3	-0.36605	7.7409e-18
CPSF2	14q32.12	-0.366182	7.51996e-18
XPO1	2p15	-0.366342	7.25921e-18
CDC25C	5q31.2	-0.366465	7.06399e-18
CHEK2	22q12.1	-0.366587	6.87696e-18
BRCA1	17q21.31	-0.366639	6.79792e-18
NMD3	3q26.1	-0.366976	6.31027e-18
C1ORF112	1q24.2	-0.367237	5.95607e-18
PIF1	15q22.31	-0.367595	5.50269e-18
CPSF3	2p25.1	-0.367851	5.19958e-18
CAND1	12q14.3-q15	-0.367971	5.06291e-18
SMC2	9q31.1	-0.368408	4.59485e-18
SMARCD1	12q13.12	-0.368533	4.46858e-18
FAAP24	19q13.11	-0.368557	4.44458e-18
TESMIN	11q13.3	-0.368573	4.42883e-18
TMEM237	2q33.1	-0.369234	3.8237e-18
PHF6	Xq26.2	-0.369586	3.53486e-18
FEN1	11q12.2	-0.369618	3.50955e-18
DDIAS	11q14.1	-0.369745	3.41151e-18
SNRPD1	18q11.2	-0.369839	3.34044e-18
ATAD5	17q11.2	-0.37009	3.15827e-18
XRN2	20p11.22	-0.370536	2.85855e-18
ZC3H8	2q14.1	-0.370598	2.81899e-18
INCENP	11q12.3	-0.370979	2.58849e-18
BRI3BP	12q24.31	-0.371184	2.47212e-18
PSMD14	2q24.2	-0.371623	2.24025e-18
JARID2	6p22.3	-0.37172	2.19182e-18
DEPDC1B	5q12.1	-0.37178	2.16263e-18
MARS	12q13.3	-0.371955	2.07923e-18
MELK	9p13.2	-0.372052	2.03442e-18
SMC6	2p24.2	-0.372087	2.01847e-18
MCM6	2q21.3	-0.372399	1.8815e-18
CTPS1	1p34.2	-0.372447	1.86125e-18
MIS18A	21q22.11	-0.372549	1.81885e-18
PAK1IP1	6p24.2	-0.373152	1.58759e-18
DCUN1D1	3q26.33	-0.373207	1.56791e-18
PNPT1	2p16.1	-0.37343	1.49093e-18
ZFP69B	1p34.2	-0.373971	1.31895e-18
SSB	2q31.1	-0.374273	1.23176e-18
KPNA2	17q24.2	-0.374303	1.22357e-18
FANCB	Xp22.2	-0.374787	1.09605e-18
SUV39H2	10p13	-0.374974	1.05052e-18
UHRF1	19p13.3	-0.37502	1.03954e-18
RAD51	15q15.1	-0.375407	9.5192e-19
DIAPH3	13q21.2	-0.375736	8.83197e-19
AURKB	17p13.1	-0.375813	8.67877e-19
ORC6	16q11.2	-0.376179	7.98459e-19
ZFP64	20q13.2	-0.376212	7.92445e-19
WDR76	15q15.3	-0.376455	7.49689e-19
FIGN	2q24.3	-0.3765	7.42019e-19
DDX1	2p24.3	-0.376935	6.71642e-19
HOXD11	2q31.1	-0.377107	6.4575e-19
FUBP1	1p31.1	-0.377144	6.40348e-19
PCSK1	5q15	-0.377171	6.36405e-19
RAB10	2p23.3	-0.377328	6.13939e-19
SLC5A6	2p23.3	-0.377422	6.00764e-19
SSR1	6p24.3	-0.377459	5.95785e-19
SRPK1	6p21.31	-0.377494	5.90941e-19
PSMD11	17q11.2	-0.377552	5.83225e-19
PPP2R1B	11q23.1	-0.378388	4.81231e-19
ADNP	20q13.13	-0.37845	4.74444e-19
TBC1D31	8q24.13	-0.378693	4.4865e-19
TMPO-AS1	12q23.1	-0.378808	4.36935e-19
RAD54B	8q22.1	-0.379542	3.68916e-19
FAM98B	15q14	-0.379603	3.63729e-19
RPN2	20q11.23	-0.379755	3.51159e-19
ACTL6A	3q26.33	-0.379776	3.49507e-19
FAM131C	1p36.13	-0.380094	3.24698e-19
C2ORF49	2q12.2	-0.380299	3.0966e-19
C17ORF53	17q21.31	-0.380459	2.98416e-19
MMS22L	6q16.1	-0.380819	2.74486e-19
DDX52	17q12	-0.380891	2.69951e-19
IGF2BP3	7p15.3	-0.381488	2.35022e-19
MCM4	8q11.21	-0.381514	2.33594e-19
CDKN3	14q22.2	-0.381587	2.29637e-19
RFC5	12q24.23	-0.381885	2.14291e-19
TSN	2q14.3	-0.382449	1.87865e-19
RFC3	13q13.2	-0.382791	1.73464e-19
DNM1L	12p11.21	-0.382876	1.70071e-19
PRIM1	12q13.3	-0.382981	1.65923e-19
BIRC5	17q25.3	-0.383059	1.62939e-19
LCLAT1	2p23.1	-0.383297	1.54124e-19
PLK4	4q28.1	-0.383358	1.51948e-19
TLK1	2q31.1	-0.383553	1.4517e-19
GMPS	3q25.31	-0.383659	1.41581e-19
RAN	12q24.33	-0.383717	1.39699e-19
MFN1	3q26.33	-0.383874	1.34644e-19
CCDC34	11p14.1	-0.384166	1.25716e-19
DNA2	10q21.3	-0.384189	1.25044e-19
MTIF2	2p16.1	-0.384376	1.19676e-19
OPA1	3q29	-0.384754	1.0952e-19
CDK1	10q21.2	-0.384901	1.05778e-19
PPIL1	6p21.2	-0.384963	1.04245e-19
NRDC	1p32.3	-0.385106	1.00798e-19
RIF1	2q23.3	-0.385348	9.52238e-20
KNTC1	12q24.31	-0.385432	9.33658e-20
CTSV	9q22.33	-0.385471	9.24929e-20
MKI67	10q26.2	-0.385697	8.77013e-20
TIPIN	15q22.31	-0.386338	7.53761e-20
KNSTRN	15q15.1	-0.386467	7.31238e-20
HAT1	2q31.1	-0.386964	6.49993e-20
PCLAF	15q22.31	-0.387255	6.06672e-20
E2F8	11p15.1	-0.387304	5.99691e-20
RANBP1	22q11.21	-0.387818	5.30774e-20
HSPD1	2q33.1	-0.38783	5.29308e-20
E2F6	2p25.1	-0.388313	4.71902e-20
ATP2B1	12q21.33	-0.388462	4.55418e-20
CIB2	15q25.1	-0.388656	4.34874e-20
CDC27	17q21.32	-0.388987	4.01827e-20
MSH6	2p16.3	-0.389453	3.59581e-20
NUP107	12q15	-0.389727	3.36716e-20
TFCP2	12q13.12-q13.13	-0.389912	3.22181e-20
MCM2	3q21.3	-0.389959	3.18565e-20
CDC25A	3p21.31	-0.390042	3.12278e-20
ANAPC1	2q13	-0.390533	2.77646e-20
KIF18B	17q21.31	-0.390603	2.72996e-20
KIF15	3p21.31	-0.391437	2.23448e-20
PLK1	16p12.2	-0.391534	2.18294e-20
FAM72D	1q21.1	-0.391746	2.07425e-20
XPOT	12q14.2	-0.391879	2.00897e-20
XPO5	6p21.1	-0.39202	1.94188e-20
GEN1	2p24.2	-0.392077	1.91511e-20
DNAJB11	3q27.3	-0.392441	1.75448e-20
FAM72A	1q32.1	-0.392628	1.67694e-20
UNG	12q24.11	-0.393076	1.50459e-20
POLE2	14q21.3	-0.393118	1.48946e-20
SKA3	13q12.11	-0.393409	1.38824e-20
PRPF40A	2q23.3	-0.39426	1.12939e-20
SKP2	5p13.2	-0.394418	1.08682e-20
HNRNPR	1p36.12	-0.394562	1.04938e-20
ZNF286A	17p12	-0.394685	1.01857e-20
GTF3C3	2q33.1	-0.395132	9.13525e-21
FAM72B	1p11.2	-0.395648	8.05579e-21
KIF20A	5q31.2	-0.39577	7.81825e-21
PSMD1	2q37.1	-0.395777	7.80567e-21
ZNF473	19q13.33	-0.396032	7.33437e-21
CKAP4	12q23.3	-0.396428	6.65724e-21
SLC38A1	12q13.11	-0.396674	6.26749e-21
CLGN	4q31.1	-0.397295	5.3825e-21
SNRPA1	15q26.3	-0.39738	5.27195e-21
CAD	2p23.3	-0.397588	5.0086e-21
GGH	8q12.3	-0.397655	4.92783e-21
MCM10	10p13	-0.397687	4.88835e-21
MYBL2	20q13.12	-0.397952	4.58096e-21
NCAPG2	7q36.3	-0.398134	4.38034e-21
ZWINT	10q21.1	-0.398456	4.04609e-21
TMPO	12q23.1	-0.398586	3.91827e-21
SPAG5	17q11.2	-0.398705	3.80468e-21
GMNN	6p22.3	-0.398996	3.54194e-21
PRR11	17q22	-0.399363	3.23463e-21
PCNA	20p12.3	-0.399828	2.88292e-21
PIMREG	17p13.2	-0.40063	2.36331e-21
SASS6	1p21.2	-0.400643	2.35578e-21
MTMR2	11q21	-0.402034	1.66651e-21
ZRANB3	2q21.3	-0.402404	1.51973e-21
CENPI	Xq22.1	-0.402681	1.41812e-21
PSME4	2p16.2	-0.403217	1.24003e-21
CNOT9	2q35	-0.405324	7.30315e-22
CDCA8	1p34.3	-0.405687	6.66304e-22
PDIA6	2p25.1	-0.406115	5.97988e-22
RAD54L	1p34.1	-0.406597	5.29359e-22
MAD2L1	4q27	-0.406743	5.10186e-22
CDK2	12q13.2	-0.406891	4.91417e-22
STRAP	12p12.3	-0.40694	4.85331e-22
AURKA	20q13.2	-0.406964	4.82347e-22
NUF2	1q23.3	-0.406988	4.79425e-22
C18ORF54	18q21.2	-0.407143	4.60989e-22
CDC20	1p34.2	-0.407173	4.57442e-22
E2F7	12q21.2	-0.407898	3.80512e-22
CENPN	16q23.2	-0.408603	3.17946e-22
TOP2A	17q21.2	-0.409106	2.79631e-22
CENPE	4q24	-0.409618	2.45362e-22
E2F3	6p22.3	-0.4102	2.11374e-22
WDR43	2p23.2	-0.410208	2.10946e-22
ZC3H15	2q32.1	-0.410246	2.0888e-22
DHX36	3q25.2	-0.410458	1.97813e-22
HDAC2	6q21	-0.411361	1.56862e-22
ZNF146	19q13.12	-0.411921	1.35784e-22
WDR75	2q32.2	-0.41233	1.22187e-22
KIF20B	10q23.31	-0.412405	1.19828e-22
TROAP	12q13.12	-0.41289	1.05716e-22
CCDC138	2q13	-0.412916	1.05023e-22
CDC7	1p22.1	-0.413181	9.80529e-23
CCNB1	5q13.2	-0.413399	9.26635e-23
FBXO5	6q25.2	-0.414592	6.79846e-23
POLQ	3q13.33	-0.414606	6.77316e-23
WDHD1	14q22.2-q22.3	-0.415003	6.10864e-23
SGO1	3p24.3	-0.415654	5.15391e-23
NUP153	6p22.3	-0.415785	4.98141e-23
CLSPN	1p34.3	-0.415812	4.94537e-23
UBA2	19q13.11	-0.415893	4.84277e-23
ESPL1	12q13.13	-0.416021	4.68236e-23
HASPIN	17p13.2	-0.416071	4.62173e-23
WDR12	2q33.2	-0.416202	4.46693e-23
CCNA2	4q27	-0.416259	4.40064e-23
SLC38A2	12q13.11	-0.417235	3.40706e-23
NOP56	20p13	-0.417737	2.98579e-23
MSH2	2p21-p16.3	-0.417784	2.94946e-23
CSNK2A3	11p15.4	-0.418013	2.77714e-23
CDCA3	12p13.31	-0.418203	2.64133e-23
ARHGAP11B	15q13.2	-0.418671	2.33505e-23
NAA50	3q13.31	-0.418677	2.33114e-23
ESF1	20p12.1	-0.419168	2.04764e-23
MTHFD2	2p13.1	-0.419343	1.95546e-23
NOL10	2p25.1	-0.419685	1.78597e-23
GTSE1	22q13.31	-0.41987	1.70094e-23
CDC6	17q21.2	-0.41989	1.69164e-23
CENPF	1q41	-0.420466	1.45217e-23
ESCO2	8p21.1	-0.420618	1.39479e-23
ENTPD7	10q24.2	-0.420866	1.30581e-23
FBXO45	3q29	-0.421191	1.19784e-23
CDC45	22q11.21	-0.421204	1.19367e-23
KDM1A	1p36.12	-0.421221	1.18828e-23
TOPBP1	3q22.1	-0.421757	1.03011e-23
PBK	8p21.1	-0.422471	8.51397e-24
CKAP2L	2q14.1	-0.422958	7.47574e-24
DENR	12q24.31	-0.423198	7.01066e-24
CDCA5	11q13.1	-0.423311	6.80137e-24
CHEK1	11q24.2	-0.425468	3.80766e-24
RNASEH1	2p25.3	-0.425493	3.78288e-24
NUSAP1	15q15.1	-0.425798	3.48301e-24
CSNK2A1	20p13	-0.425985	3.31171e-24
ERCC6L	Xq13.1	-0.426608	2.79822e-24
RSRC1	3q25.32	-0.426734	2.70407e-24
DSCC1	8q24.12	-0.427102	2.44758e-24
GINS1	20p11.21	-0.427579	2.15012e-24
KRR1	12q21.2	-0.428998	1.46051e-24
CCNB2	15q22.2	-0.431145	8.10956e-25
FOXM1	12p13.33	-0.431584	7.18837e-25
SKA1	18q21.1	-0.432508	5.57053e-25
RFC4	3q27.3	-0.433287	4.49071e-25
STIL	1p33	-0.433725	3.97729e-25
XRCC5	2q35	-0.433883	3.80656e-25
KIF4A	Xq13.1	-0.434537	3.17374e-25
NDC80	18p11.32	-0.434831	2.92503e-25
NEK2	1q32.3	-0.43521	2.63197e-25
SSX2IP	1p22.3	-0.435256	2.59829e-25
AUNIP	1p36.11	-0.436967	1.61042e-25
RAD51AP1	12p13.32	-0.437179	1.51721e-25
CDCA2	8p21.2	-0.437611	1.34395e-25
HELLS	10q23.33	-0.437686	1.31597e-25
RACGAP1	12q13.12	-0.439607	7.65518e-26
PPT2	6p21.32	-0.440014	6.82317e-26
ORC1	1p32.3	-0.440258	6.36654e-26
SPC25	2q24.3	-0.440315	6.26501e-26
TTK	6q14.1	-0.440603	5.77333e-26
KIFC1	6p21.32	-0.440855	5.37527e-26
CENPA	2p23.3	-0.441413	4.58631e-26
KIF11	10q23.33	-0.441598	4.3511e-26
TDG	12q23.3	-0.442611	3.25979e-26
SENP1	12q13.11	-0.443064	2.86361e-26
NCAPH	2q11.2	-0.443531	2.50523e-26
KIF2C	1p34.1	-0.443691	2.39284e-26
R3HDM1	2q21.3	-0.444561	1.86379e-26
DNAJC10	2q32.1	-0.445531	1.40952e-26
RIOK1	6p24.3	-0.445914	1.26201e-26
POFUT1	20q11.21	-0.44593	1.2561e-26
TMTC3	12q21.32	-0.445966	1.24312e-26
BUB1	2q13	-0.447363	8.2948e-27
NDC1	1p32.3	-0.447676	7.57498e-27
CIP2A	3q13.13	-0.448517	5.93142e-27
CSE1L	20q13.13	-0.450608	3.2184e-27
PFN2	3q25.1	-0.451412	2.54102e-27
TPX2	20q11.21	-0.451546	2.44286e-27
MLLT11	1q21.3	-0.451638	2.37816e-27
NCAPG	4p15.31	-0.451664	2.35978e-27
PRC1	15q26.1	-0.453013	1.58507e-27
DLGAP5	14q22.3	-0.453955	1.19895e-27
PARPBP	12q23.2	-0.45438	1.05693e-27
OIP5	15q15.1	-0.455075	8.59653e-28
ASPM	1q31.3	-0.45529	8.06348e-28
EMC1	1p36.13	-0.4556	7.3498e-28
KNL1	15q15.1	-0.455964	6.59404e-28
TICRR	15q26.1	-0.456355	5.86704e-28
ARHGAP11A	15q13.3	-0.456896	4.99006e-28
HJURP	2q37.1	-0.457366	4.33366e-28
KIF18A	11p14.1	-0.457535	4.12024e-28
RRM2	2p25.1	-0.458298	3.27587e-28
DEPDC1	1p31.3	-0.46038	1.74676e-28
KIF14	1q32.1	-0.460913	1.4863e-28
PAWR	12q21.2	-0.461335	1.30726e-28
SGO2	2q33.1	-0.464031	5.73952e-29
RAB3B	1p32.3	-0.464051	5.70526e-29
NCAPD2	12p13.31	-0.464392	5.13783e-29
BLM	15q26.1	-0.464474	5.01065e-29
BUB1B	15q15.1	-0.465355	3.82177e-29
TRMT6	20p12.3	-0.470278	8.28363e-30
SPATS2	12q13.12	-0.470482	7.77121e-30
EXO1	1q43	-0.471424	5.78345e-30
CENPO	2p23.3	-0.472461	4.1726e-30
FANCI	15q26.1	-0.47416	2.43873e-30
SMIM13	6p24.2	-0.474567	2.14303e-30
ECT2	3q26.31	-0.474775	2.00592e-30
MAPK6	15q21.2	-0.476001	1.35776e-30
TIMELESS	12q13.3	-0.476841	1.03803e-30
ZWILCH	15q22.31	-0.476911	1.01527e-30
EHBP1	2p15	-0.478697	5.72262e-31
UCK2	1q24.1	-0.480799	2.90247e-31
KIF23	15q23	-0.484263	9.38242e-32
FAM83D	20q11.23	-0.48758	3.14454e-32
SELENOI	2p23.3	-0.491093	9.74869e-33
MCM8	20p12.3	-0.525317	5.15739e-38

## Sheet: Venn Diagram
Supplementary Table 2
Genes correlated to ALDOA and FBP1 expression of LUAD in the TCGA (Firehose Legacy dataset).
Overlapped Gene
ESPL1
CCNB1
GINS3
DDOST
FARSB
BIRC5
PLK1
HSPD1
CDK1
NEIL3
MRPL47
FAM72B
ORC1
NUP37
CENPH
CDCA4
CTSV
PTGES3
CDC25C
CDC6
MYBL2
MAD2L1
EIF4A3
AURKB
CKS1B
CCT4
STC1
LRRC42
PSMC4
KIF4A
RUVBL1
SPDL1
RANBP1
KIF2C
LYPD3
FAM72D
PSMD2
PSMD12
TRAIP
CENPA
CENPN
CDC20
ZWINT
RFC4
OIP5
CCNA2
C19ORF48
PLOD2
TROAP
TFG
CDCA5
RAN
UBE2T
SLC2A1
PSMD14
SKA3
BRI3BP
PGAM5
SHCBP1
MTFR2
UBE2S
CMSS1
PCLAF
CDCA3
PIMREG
SNRPA1
TACC3
PREB
UBE2C
CCNB2
PRC1
CDT1
CENPW
DTYMK
AUNIP
RRM2
FEN1
RAD54L
CDC45
SPC25
MCM2
KCMF1
PTPRN
HJURP
RAD51
HMMR
EXO1
PPM1G
EGLN3
KIF20A
ORC6
STC2
CDKN3
NCAPG
CCDC58
GINS2
CDCA8
