# Supplementary material for: The role of fructose 1,6-bisphosphate-mediated glycolysis/gluconeogenesis genes in cancer prognosis
Source: Aging (Albany NY). 2022 Apr 11;14(7):3233–58. doi: 10.18632/aging.204010 (PMC9037270; doi:10.18632/aging.204010)
Supplement: Supplementary Table 3 [file aging-14-204010-s004.xlsx]

## Sheet: Venn Diagram
Supplementary Table 3. Genes overlapped to ALDOA and FBP1 expression of LUAD in the TCGA (PanCancer Atlas dataset and Firehose Legacy dataset).
Overlapped Gene
CDKN3
ESPL1
HSPD1
CENPA
AURKB
CDK1
NCAPG
EXO1
PCLAF
FARSB
CDCA3
SKA3
CKS1B
PIMREG
CDT1
CDC6
CCDC58
SPC25
CCT4
NEIL3
MRPL47
CENPW
MCM2
BRI3BP
DTYMK
FAM72B
KCMF1
ORC1
RUVBL1
PPM1G
SNRPA1
PGAM5
CDC20
CENPN
SPDL1
MYBL2
NUP37
CENPH
RANBP1
EGLN3
TACC3
CDCA4
AUNIP
TROAP
KIF2C
TFG
BIRC5
KIF20A
RRM2
ZWINT
PLK1
LYPD3
CDCA5
CCNB1
GINS2
STC1
RAN
PTPRN
UBE2T
SHCBP1
PREB
SLC2A1
ORC6
PSMD14
FEN1
UBE2C
MTFR2
RAD51
LRRC42
UBE2S
MAD2L1
EIF4A3
CTSV
PSMC4
RFC4
STC2
HMMR
OIP5
CCNA2
FAM72D
CMSS1
KIF4A
CCNB2
PSMD2
PTGES3
RAD54L
CDC25C
GINS3
PSMD12
CDC45
HJURP
PRC1
DDOST
C19ORF48
PLOD2
CDCA8
