# Supplementary material for: The role of fructose 1,6-bisphosphate-mediated glycolysis/gluconeogenesis genes in cancer prognosis
Source: Aging (Albany NY). 2022 Apr 11;14(7):3233–58. doi: 10.18632/aging.204010 (PMC9037270; doi:10.18632/aging.204010)
Supplement: Supplementary Table 4 [file aging-14-204010-s005.xlsx]

## Sheet: ALDOA correlated molecules
Supplementary Table 4. Genes correlated to ALDOA and FBP1 expression of LIHC in the TCGA (PanCancer Atlas dataset).
Correlated Gene	Cytoband	Spearman's Correlation	p-Value
LCMT1	16p12.1	0.710846	1.37415e-57
ST6GALNAC4	9q34.11	0.681281	2.9736e-51
GAPDH	12p13.31	0.676285	2.9547e-50
SH3BGRL3	1p36.11	0.67274	1.46636e-49
UBE2I	16p13.3	0.663537	8.47707e-48
ENO1	1p36.23	0.656069	2.05437e-46
G6PD	Xq28	0.652701	8.39895e-46
LPCAT1	5p15.33	0.652526	9.0321e-46
SLC52A2	8q24.3	0.634881	1.08213e-42
PKM	15q23	0.632851	2.37493e-42
MPV17	2p23.3	0.6313	4.31197e-42
SLC16A3	17q25.3	0.623156	9.36648e-41
TUBA1C	12q13.12	0.621026	2.06451e-40
ZNF668	16p11.2	0.620905	2.15844e-40
ARPC1B	7q22.1	0.615047	1.83711e-39
MVP	16p11.2	0.612641	4.37064e-39
DCTN5	16p12.2	0.610321	1.00084e-38
ATP6V1F	7q32.1	0.608392	1.98264e-38
MAP7D1	1p34.3	0.606076	4.478e-38
BOLA2	16p11.2	0.605794	4.94267e-38
GIT1	17q11.2	0.605448	5.57726e-38
BAK1	6p21.31	0.601032	2.58004e-37
S100A11	1q21.3	0.599293	4.68576e-37
NCDN	1p34.3	0.599242	4.76766e-37
LIMK1	7q11.23	0.599069	5.05838e-37
TTC39A	1p32.3	0.596857	1.07417e-36
G6PC3	17q21.31	0.594285	2.55962e-36
JPT1	17q25.1	0.591584	6.31869e-36
XPO6	16p12.1	0.591407	6.70203e-36
CD2BP2	16p11.2	0.589308	1.34407e-35
TBC1D10B	16p11.2	0.587096	2.78274e-35
PHLDA2	11p15.4	0.583535	8.87667e-35
MFSD10	4p16.3	0.583242	9.75944e-35
CLIC1	6p21.33	0.582921	1.0827e-34
ELOVL1	1p34.2	0.582817	1.1197e-34
CHMP4B	20q11.22	0.581976	1.46882e-34
ATP13A2	1p36.13	0.580525	2.34083e-34
SLC1A5	19q13.32	0.579279	3.48602e-34
IQCD	12q24.13	0.578098	5.07804e-34
RABEP2	16p11.2	0.575746	1.06894e-33
AGTRAP	1p36.22	0.571948	3.5111e-33
VASP	19q13.32	0.567245	1.49913e-32
CFL1	11q13.1	0.565898	2.26216e-32
POLR3K	16p13.3	0.564777	3.18162e-32
ABCC1	16p13.11	0.564548	3.40994e-32
CAPNS1	19q13.12	0.564456	3.50725e-32
UQCRH	1p33	0.562871	5.66344e-32
MAPK3	16p11.2	0.562426	6.47634e-32
TMSB10	2p11.2	0.560828	1.04664e-31
GLA	Xq22.1	0.558126	2.34318e-31
FBXL19	16p11.2	0.557232	3.05349e-31
ZNF213	16p13.3	0.556161	4.18964e-31
TRPM2	21q22.3	0.555898	4.52764e-31
CD63	12q13.2	0.5552	5.56074e-31
TMEM147	19q13.12	0.554914	6.04749e-31
UBE2M	19q13.43	0.553419	9.36938e-31
CYTOR	2p11.2	0.55292	1.08388e-30
RAB5IF	20q11.23	0.552204	1.33542e-30
GCNT3	15q22.2	0.551726	1.53466e-30
METTL9	16p12.2	0.549949	2.56699e-30
PSMD14	2q24.2	0.548813	3.56179e-30
UBE2S	19q13.42	0.546722	6.48558e-30
SMG9	19q13.31	0.546593	6.73035e-30
CORO7	16p13.3	0.544335	1.27901e-29
GTF3C6	6q21	0.542691	2.03553e-29
ADGRE5	19p13.12	0.542519	2.13678e-29
LY96	8q21.11	0.541642	2.73448e-29
ATP1B3	3q23	0.54127	3.03522e-29
CDK16	Xp11.3	0.540063	4.25479e-29
GYG1	3q24	0.539812	4.56354e-29
GNPDA1	5q31.3	0.539661	4.76028e-29
PLEKHB2	2q21.1	0.539391	5.13282e-29
ANXA5	4q27	0.539375	5.15528e-29
ARHGAP22	10q11.22-q11.23	0.537727	8.15199e-29
SLC2A1	1p34.2	0.537472	8.74826e-29
RNPS1	16p13.3	0.537073	9.76888e-29
IFI27L2	14q32.12	0.535653	1.44539e-28
FUNDC2	Xq28	0.535357	1.5682e-28
ZDHHC7	16q24.1	0.533382	2.6946e-28
DCTPP1	16p11.2	0.532356	3.56491e-28
HDDC2	6q22.31	0.530987	5.17063e-28
RCC2	1p36.13	0.530174	6.4423e-28
NXPH4	12q13.3	0.529746	7.23249e-28
PPIH	1p34.2	0.529714	7.29512e-28
TEAD2	19q13.33	0.529618	7.48546e-28
BSG	19p13.3	0.527705	1.25239e-27
ATP6V0B	1p34.1	0.526813	1.5899e-27
PFKP	10p15.2	0.526394	1.77835e-27
PLIN3	19p13.3	0.52638	1.78475e-27
SPP1	4q22.1	0.525622	2.18477e-27
PMM2	16p13.2	0.525004	2.57457e-27
GLTP	12q24.11	0.524035	3.32938e-27
PLAUR	19q13.31	0.523422	3.91622e-27
PPT1	1p34.2	0.523398	3.94113e-27
GPI	19q13.11	0.523331	4.01133e-27
SRM	1p36.22	0.522858	4.54472e-27
MIR4435-2HG	2q13	0.522825	4.58392e-27
TOMM40	19q13.32	0.519574	1.07568e-26
RHOG	11p15.4	0.519406	1.12404e-26
OAZ1	19p13.3	0.519275	1.163e-26
UQCRHL	1p36.21	0.518956	1.26377e-26
STX4	16p11.2	0.518636	1.37358e-26
DLGAP4	20q11.23	0.518541	1.40803e-26
UPP1	7p12.3	0.51853	1.41189e-26
RGS2	1q31.2	0.517824	1.69601e-26
TRAPPC4	11q23.3	0.517373	1.90666e-26
ENO2	12p13.31	0.517032	2.08262e-26
EIPR1	2p25.3	0.516235	2.55894e-26
LGALS9	17q11.2	0.515319	3.24004e-26
TPD52L2	20q13.33	0.515038	3.48285e-26
UAP1L1	9q34.3	0.514815	3.68777e-26
ADPRHL2	1p34.3	0.51414	4.38518e-26
TUBA1B	12q13.12	0.513974	4.57624e-26
CCDC88B	11q13.1	0.513214	5.55874e-26
RELT	11q13.4	0.512998	5.87312e-26
AACS	12q24.31	0.512365	6.90344e-26
CHST12	7p22.3	0.512236	7.1336e-26
PDLIM7	5q35.3	0.510735	1.04438e-25
SLC35E4	22q12.2	0.510325	1.15865e-25
H2AFY	5q31.1	0.510187	1.19991e-25
SLC6A8	Xq28	0.510114	1.2224e-25
DCTN2	12q13.3	0.51008	1.23289e-25
PPP2R1A	19q13.41	0.510051	1.24208e-25
SLC25A6	Xp22.33 and Yp11.2	0.509512	1.42326e-25
FKBP1A	20p13	0.509503	1.42634e-25
ANXA2	15q22.2	0.508909	1.65662e-25
RAN	12q24.33	0.508637	1.77446e-25
CARD19	9q22.31	0.506556	2.98998e-25
MOB3A	19p13.3	0.505413	3.97692e-25
MFSD5	12q13.13	0.504819	4.61085e-25
MTHFD1L	6q25.1	0.504481	5.01441e-25
KNOP1	16p12.3	0.504337	5.19645e-25
C4ORF48	4p16.3	0.504298	5.24663e-25
YKT6	7p13	0.504013	5.6318e-25
FCHO1	19p13.11	0.502265	8.67367e-25
ATP6V0C	16p13.3	0.501834	9.64563e-25
CREB3	9p13.3	0.50156	1.03185e-24
CIAPIN1	16q21	0.501408	1.07126e-24
HK2	2p12	0.501218	1.12244e-24
FCGR1B	1p11.2	0.500706	1.27248e-24
PPP1R14B	11q13.1	0.500375	1.37998e-24
SELENOM	22q12.2	0.500347	1.38945e-24
PELO	5q11.2	0.499789	1.59292e-24
CCT5	5p15.2	0.499571	1.68011e-24
PRMT1	19q13.33	0.499497	1.71052e-24
RAP1GAP	1p36.12	0.499281	1.80319e-24
NT5C3A	7p14.3	0.498711	2.07219e-24
PYCARD	16p11.2	0.498249	2.31861e-24
KCNF1	2p25.1	0.497861	2.54846e-24
NUTF2	16q22.1	0.497617	2.70357e-24
IMPDH1	7q32.1	0.495828	4.1685e-24
IL4I1	19q13.33	0.495629	4.37375e-24
C5ORF30	5q21.1	0.495404	4.61743e-24
MPZL1	1q24.2	0.495258	4.7823e-24
BLVRA	7p13	0.49507	5.004e-24
TREM2	6p21.1	0.49476	5.39127e-24
FCGR1A	1q21.2	0.494476	5.77263e-24
VOPP1	7p11.2	0.494134	6.26545e-24
YBX1	1p34.2	0.493834	6.73412e-24
MRPS12	19q13.2	0.493626	7.07856e-24
RAB6B	3q22.1	0.493225	7.79144e-24
SMYD5	2p13.2	0.493114	7.9999e-24
RENBP	Xq28	0.493036	8.15066e-24
CTSC	11q14.2	0.492986	8.24853e-24
HMGA1	6p21.31	0.492088	1.0221e-23
DYNLL1	12q24.31	0.491663	1.13102e-23
ANKRD13D	11q13.2	0.490733	1.41071e-23
BCAR1	16q23.1	0.490474	1.50007e-23
FTSJ1	Xp11.23	0.489798	1.76042e-23
GBGT1	9q34.2	0.489466	1.90434e-23
NUDT1	7p22.3	0.489192	2.03159e-23
HOMER3	19p13.11	0.488682	2.29115e-23
SNRPD2	19q13.32	0.48864	2.31407e-23
MICAL1	6q21	0.488058	2.65393e-23
TMEM165	4q12	0.487926	2.73786e-23
JMJD6	17q25.1	0.487781	2.83288e-23
FHDC1	4q31.3	0.487631	2.93433e-23
PTDSS2	11p15.5	0.485775	4.53142e-23
MAPRE1	20q11.21	0.485293	5.07028e-23
PNCK	Xq28	0.485254	5.1167e-23
LSP1P5	1q21.1	0.485148	5.245e-23
PRR7	5q35.3	0.48502	5.4032e-23
TMC6	17q25.3	0.48461	5.94401e-23
RUNDC3A	17q21.31	0.482983	8.67025e-23
MAP1LC3B	16q24.2	0.482971	8.69433e-23
PPIA	7p13	0.482758	9.13366e-23
FCGR1CP	1q21.1	0.48154	1.20942e-22
S100A6	1q21.3	0.481476	1.22751e-22
TPRN	9q34.3	0.481316	1.2735e-22
RHOC	1p13.2	0.480875	1.4094e-22
SLC10A3	Xq28	0.480787	1.43821e-22
C15ORF39	15q24.2	0.480409	1.5686e-22
H2AFZ	4q23	0.480047	1.70433e-22
PFDN1	5q31.3	0.478627	2.35748e-22
LRP8	1p32.3	0.478404	2.48071e-22
TNFRSF18	1p36.33	0.477731	2.89103e-22
RPUSD1	16p13.3	0.477448	3.08307e-22
PGD	1p36.22	0.477001	3.41301e-22
GMIP	19p13.11	0.476893	3.49708e-22
SNRPA	19q13.2	0.476877	3.50984e-22
DGKG	3q27.2-q27.3	0.476769	3.59705e-22
GPR84	12q13.13	0.475925	4.35363e-22
TSC22D4	7q22.1	0.475876	4.40223e-22
TPI1	12p13.31	0.475474	4.82128e-22
MBOAT7	19q13.42	0.474543	5.94675e-22
MLST8	16p13.3	0.474234	6.37447e-22
ATG9B	7q36.1	0.474121	6.53835e-22
BABAM2	2p23.2	0.473977	6.75305e-22
NUP93	16q13	0.473907	6.86004e-22
P2RY6	11q13.4	0.473434	7.62825e-22
UCHL1	4p13	0.472695	8.99996e-22
DBNDD2	20q13.12	0.471876	1.08072e-21
SYNGR3	16p13.3	0.471141	1.27294e-21
CHST11	12q23.3	0.470942	1.33045e-21
MICOS10	1p36.13	0.470769	1.3827e-21
TUBB3	16q24.3	0.470615	1.43081e-21
IKBKE	1q32.1	0.470355	1.51581e-21
ZCCHC17	1p35.2	0.469517	1.82538e-21
PIP4P2	8q21.3	0.46944	1.85659e-21
ARPC2	2q35	0.469077	2.01185e-21
NABP2	12q13.3	0.468962	2.06341e-21
UBE2MP1	16p11.2	0.468943	2.07237e-21
RNF24	20p13	0.468877	2.10284e-21
DUSP13	10q22.2	0.468135	2.47662e-21
SLC7A7	14q11.2	0.467974	2.56586e-21
PUSL1	1p36.33	0.467613	2.77818e-21
FAM27C	9q13	0.467247	3.01096e-21
TAGLN2	1q23.2	0.467207	3.03752e-21
IFI30	19p13.11	0.466877	3.26586e-21
LINC00239	14q32.31	0.466544	3.51285e-21
YARS	1p35.1	0.466332	3.68035e-21
STIP1	11q13.1	0.466076	3.89251e-21
RAB3IL1	11q12.2-q12.3	0.465968	3.98489e-21
TMEM51	1p36.21	0.465846	4.09343e-21
ATP6V1E1	22q11.21	0.465834	4.10396e-21
RIN1	11q13.2	0.465531	4.38469e-21
ARPC3	12q24.11	0.465404	4.50852e-21
USB1	16q21	0.465344	4.56769e-21
ARF3	12q13.12	0.46533	4.58162e-21
RBM38	20q13.31	0.465169	4.74576e-21
METRNL	17q25.3	0.465053	4.86688e-21
LAT2	7q11.23	0.464956	4.97107e-21
ARPC4	3p25.3	0.464739	5.21141e-21
TLCD3A	17p13.3	0.464497	5.49359e-21
KIF2C	1p34.1	0.464469	5.52724e-21
PSMD2	3q27.1	0.464426	5.57875e-21
NOMO1	16p13.11	0.463949	6.18925e-21
PLXNA1	3q21.3	0.463473	6.86326e-21
ATG7	3p25.3	0.463407	6.96273e-21
LPCAT4	15q14	0.463223	7.24602e-21
GTF3C1	16p12.1	0.46315	7.36173e-21
HAGHL	16p13.3	0.463097	7.44616e-21
CA9	9p13.3	0.462995	7.61242e-21
GNA15	19p13.3	0.462978	7.64056e-21
TNFSF9	19p13.3	0.462917	7.74238e-21
SYNGR2	17q25.3	0.462908	7.75646e-21
RCOR2	11q13.1	0.462782	7.9718e-21
LHFPL2	5q14.1	0.462018	9.40296e-21
ARL2	11q13.1	0.462001	9.43731e-21
BCAT1	12p12.1	0.461832	9.78873e-21
C2ORF27A	2q21.2	0.461283	1.1019e-20
MRPL17	11p15.4	0.461017	1.16671e-20
STK32C	10q26.3	0.460667	1.25807e-20
S100A9	1q21.3	0.460662	1.25933e-20
DDOST	1p36.12	0.460541	1.29262e-20
TNFSF12-TNFSF13	17p13.1	0.460146	1.40698e-20
PGP	16p13.3	0.459922	1.47639e-20
RALY	20q11.22	0.459717	1.54259e-20
LGALS3BP	17q25.3	0.459429	1.64087e-20
PRAF2	Xp11.23	0.459421	1.64354e-20
C2ORF81	2p13.1	0.4593	1.68672e-20
PHPT1	9q34.3	0.45926	1.70136e-20
RGS10	10q26.11	0.458833	1.86396e-20
CMTM7	3p22.3	0.458541	1.98369e-20
EGLN3	14q13.1	0.457824	2.31168e-20
SHCBP1	16q11.2	0.457781	2.33261e-20
CASP4	11q22.3	0.457541	2.45507e-20
ORAI2	7q22.1	0.457534	2.45852e-20
MMP9	20q13.12	0.457403	2.52836e-20
CALB2	16q22.2	0.456991	2.75925e-20
GLRX3	10q26.3	0.456144	3.30251e-20
PKMYT1	16p13.3	0.456132	3.31126e-20
RGS19	20q13.33	0.456044	3.3731e-20
CCDC189	16p11.2	0.455956	3.43639e-20
YWHAZ	8q22.3	0.455914	3.46754e-20
E2F4	16q22.1	0.454761	4.42387e-20
SPNS1	16p11.2	0.454384	4.7893e-20
EMILIN2	18p11.32-p11.31	0.454341	4.83319e-20
TAP1	6p21.32	0.454261	4.91456e-20
SMOX	20p13	0.454124	5.05838e-20
S100A2	1q21.3	0.45407	5.11623e-20
MUC12	7q22.1	0.454023	5.16774e-20
RCC1	1p35.3	0.453948	5.24936e-20
WDR54	2p13.1	0.453821	5.39119e-20
PPP4C	16p11.2	0.453766	5.45395e-20
RTCA	1p21.2	0.453741	5.48264e-20
PRMT2	21q22.3	0.453349	5.95349e-20
EVA1B	1p34.3	0.453165	6.1882e-20
BRSK1	19q13.42	0.453025	6.37235e-20
NAGK	2p13.3	0.452634	6.91601e-20
CTDNEP1	17p13.1	0.452563	7.02004e-20
PDCL3	2q11.2	0.4523	7.41643e-20
CDCP1	3p21.31	0.452158	7.64026e-20
NTNG2	9q34.13	0.451654	8.48765e-20
MBOAT4	8p12	0.451521	8.72707e-20
LIF	22q12.2	0.45143	8.89385e-20
MYLK2	20q11.21	0.451316	9.10869e-20
SPATA12	3p14.3	0.451284	9.16865e-20
RASGEF1A	10q11.21	0.45092	9.89095e-20
DUSP4	8p12	0.450023	1.19191e-19
PAFAH1B3	19q13.2	0.449901	1.22248e-19
CHMP3	2p11.2	0.449399	1.35666e-19
PSMB2	1p34.3	0.449307	1.38274e-19
BRMS1	11q13.2	0.449157	1.42615e-19
BACE2	21q22.2-q22.3	0.449007	1.4713e-19
TUBA4A	2q35	0.448896	1.50525e-19
PSENEN	19q13.12	0.448632	1.58979e-19
SOWAHD	Xq24	0.448559	1.61412e-19
NDUFA4L2	12q13.3	0.448548	1.61777e-19
PWWP2B	10q26.3	0.448517	1.62811e-19
PLP2	Xp11.23	0.448338	1.68921e-19
ZNF580	19q13.42	0.448196	1.73969e-19
NME2	17q21.33	0.44795	1.83023e-19
UBE2L3	22q11.21	0.447683	1.93347e-19
FABP6	5q33.3	0.447507	2.00481e-19
PFDN4	20q13.2	0.447439	2.0331e-19
PPFIA4	1q32.1	0.447235	2.1206e-19
CEP89	19q13.11	0.447	2.22547e-19
TEAD4	12p13.33	0.446246	2.59765e-19
TMC5	16p12.3	0.446226	2.60857e-19
HILPDA	7q32.1	0.445896	2.79119e-19
SLC7A1	13q12.3	0.445769	2.86445e-19
TSPO	22q13.2	0.445717	2.89532e-19
EZR	6q25.3	0.445714	2.89706e-19
EFNA5	5q21.3	0.445669	2.92396e-19
SLC9A1	1p36.11	0.445546	2.99816e-19
FAM131C	1p36.13	0.445432	3.06897e-19
FLOT2	17q11.2	0.445025	3.33522e-19
LAMTOR5	1p13.3	0.444938	3.39457e-19
CARD9	9q34.3	0.444935	3.39661e-19
FCER1G	1q23.3	0.444933	3.39813e-19
PHC2	1p35.1	0.444259	3.89917e-19
B4GALNT1	12q13.3	0.444037	4.07924e-19
COPS9	2q37.3	0.4434	4.64345e-19
FLOT1	6p21.33	0.443364	4.67764e-19
GNG5	1p22.3	0.442873	5.16697e-19
CCL26	7q11.23	0.442228	5.88814e-19
VPS4A	16q22.1	0.441899	6.29274e-19
GSK3A	19q13.2	0.441602	6.68199e-19
RABL6	9q34.3	0.441017	7.51951e-19
SMARCD3	7q36.1	0.440863	7.75599e-19
RAB35	12q24.23	0.440799	7.85757e-19
SARNP	12q13.2	0.440613	8.15616e-19
RPP25	15q24.2	0.440532	8.29092e-19
S100P	4p16.1	0.440178	8.90251e-19
RHOF	12q24.31	0.439899	9.41499e-19
TYROBP	19q13.12	0.439718	9.76297e-19
TM4SF1	3q25.1	0.439622	9.95318e-19
DDA1	19p13.11	0.439216	1.07975e-18
SH3D21	1p34.3	0.439014	1.1243e-18
HSBP1	16q23.3	0.438805	1.17238e-18
MAPKAPK2	1q32.1	0.438525	1.23989e-18
ORC6	16q11.2	0.438429	1.26369e-18
RAC1	7p22.1	0.438264	1.30629e-18
ADAM12	10q26.2	0.43821	1.32043e-18
MCUB	4q25	0.437851	1.41833e-18
AP4M1	7q22.1	0.437687	1.46561e-18
TRIM47	17q25.1	0.437676	1.46861e-18
SOX11	2p25.2	0.437567	1.50094e-18
TACC3	4p16.3	0.437466	1.53158e-18
CD68	17p13.1	0.437358	1.56477e-18
EMC8	16q24.1	0.436924	1.70587e-18
UBALD2	17q25.1	0.436633	1.80733e-18
MAP1LC3B2	12q24.22	0.436569	1.8304e-18
HAVCR2	5q33.3	0.436304	1.92919e-18
GRAMD1A	19q13.11	0.436218	1.96253e-18
SYT13	11p11.2	0.436138	1.994e-18
CKLF	16q21	0.436126	1.99878e-18
TMEM234	1p35.2	0.436125	1.99916e-18
SEC61G	7p11.2	0.436013	2.04407e-18
AXIN1	16p13.3	0.435948	2.07032e-18
KLC2	11q13.2	0.435892	2.09349e-18
PLEKHO1	1q21.2	0.435503	2.26113e-18
CDC20	1p34.2	0.435338	2.33617e-18
COL9A2	1p34.2	0.435138	2.43024e-18
MTFP1	22q12.2	0.435052	2.47217e-18
S100A4	1q21.3	0.434844	2.57574e-18
IDH3G	Xq28	0.434829	2.58322e-18
GOLM1	9q21.33	0.434779	2.60919e-18
MARCKSL1	1p35.1	0.434614	2.69539e-18
C3ORF52	3q13.2	0.434358	2.83508e-18
AKR1B1	7q33	0.434011	3.03543e-18
PIK3R6	17p13.1	0.433781	3.17585e-18
MCRS1	12q13.12	0.433446	3.39249e-18
CLTA	9p13.3	0.433413	3.41427e-18
SH2D2A	1q23.1	0.433377	3.43889e-18
REEP4	8p21.3	0.432419	4.14917e-18
RTL8A	Xq26.3	0.432262	4.2786e-18
LAGE3	Xq28	0.432195	4.33534e-18
MAF1	8q24.3	0.432167	4.35908e-18
EMP3	19q13.33	0.432162	4.36388e-18
RPS2	16p13.3	0.431959	4.54015e-18
KARS	16q23.1	0.431909	4.58535e-18
PHKG2	16p11.2	0.43184	4.6475e-18
SEC61A1	3q21.3	0.431802	4.68178e-18
NRGN	11q24.2	0.431513	4.95401e-18
KIAA1324	1p13.3	0.431083	5.38687e-18
NT5C	17q25.1	0.431035	5.43799e-18
TESC	12q24.22	0.430916	5.56611e-18
CHMP1A	16q24.3	0.430818	5.67331e-18
CDK5R2	2q35	0.430656	5.8544e-18
FBRS	16p11.2	0.430594	5.92565e-18
SNCG	10q23.2	0.430257	6.32754e-18
KTI12	1p32.3	0.429776	6.94701e-18
PKIB	6q22.31	0.42961	7.17471e-18
SEL1L3	4p15.2	0.429596	7.1942e-18
C12ORF49	12q24.22	0.429589	7.20445e-18
LAPTM5	1p35.2	0.429559	7.24631e-18
MRPS34	16p13.3	0.429489	7.34468e-18
SELENOW	19q13.33	0.429314	7.59855e-18
FA2H	16q23.1	0.429305	7.61136e-18
LAMTOR1	11q13.4	0.428944	8.1641e-18
BIRC7	20q13.33	0.42894	8.16935e-18
NKAIN1	1p35.2	0.428841	8.32842e-18
SHKBP1	19q13.2	0.428742	8.48948e-18
NFKBIE	6p21.1	0.428671	8.60645e-18
PRR13	12q13.13	0.428659	8.62644e-18
SEPTIN9	17q25.3	0.42857	8.77594e-18
B3GNTL1	17q25.3	0.428537	8.83136e-18
PSMD7	16q23.1	0.428355	9.1486e-18
SPOCD1	1p35.2	0.428317	9.21592e-18
PTGES	9q34.11	0.428298	9.24887e-18
HDAC7	12q13.11	0.428165	9.49049e-18
ZNF385A	12q13.13	0.428136	9.54357e-18
PPME1	11q13.4	0.428063	9.67937e-18
UTP11	1p34.3	0.428024	9.7523e-18
PRR19	19q13.2	0.428017	9.76619e-18
FUNDC1	Xp11.3	0.427942	9.9079e-18
CDKN2D	19p13.2	0.427689	1.04026e-17
AGR2	7p21.1	0.426943	1.20098e-17
SLC38A1	12q13.11	0.42665	1.27055e-17
RTL8C	Xq26.3	0.426551	1.29516e-17
TRAF2	9q34.3	0.426464	1.31689e-17
COLGALT1	19p13.11	0.426216	1.38094e-17
CEP55	10q23.33	0.426153	1.39797e-17
CLTB	5q35.2	0.426009	1.43696e-17
ATAD3B	1p36.33	0.426008	1.43723e-17
PGK1	Xq21.1	0.425928	1.45959e-17
TAX1BP3	17p13.2	0.42585	1.48152e-17
FAM50A	Xq28	0.425768	1.50491e-17
BLOC1S4	4p16.1	0.425643	1.54146e-17
CCDC124	19p13.11	0.425605	1.55249e-17
CYBA	16q24.2	0.425393	1.617e-17
TBXAS1	7q34	0.425311	1.64249e-17
TKT	3p21.1	0.425164	1.68919e-17
TRIM46	1q22	0.425148	1.69448e-17
MAPKAPK5-AS1	12q24.12	0.425052	1.72577e-17
FZD2	17q21.31	0.424989	1.74685e-17
ACD	16q22.1	0.424975	1.75156e-17
SPI1	11p11.2	0.424901	1.7763e-17
RNFT2	12q24.22	0.424637	1.86826e-17
NOL3	16q22.1	0.42458	1.88862e-17
DRAM2	1p13.3	0.424503	1.91652e-17
CCT6A	7p11.2	0.424439	1.94001e-17
TREM1	6p21.1	0.424326	1.98253e-17
DDX39A	19p13.12	0.42415	2.05021e-17
DPM2	9q34.11	0.423871	2.16191e-17
RSL1D1	16p13.13	0.423817	2.18416e-17
LMNB2	19p13.3	0.423727	2.22205e-17
LSM10	1p34.3	0.42351	2.31552e-17
LGALS1	22q13.1	0.423193	2.45928e-17
LLPH	12q14.3	0.422768	2.66584e-17
CKS2	9q22.2	0.42269	2.70574e-17
LPAR2	19p13.11	0.422665	2.71845e-17
SZRD1	1p36.13	0.422533	2.78742e-17
PTGS1	9q33.2	0.422227	2.95402e-17
SIRT6	19p13.3	0.422207	2.96513e-17
TRIP10	19p13.3	0.422197	2.97063e-17
B9D2	19q13.2	0.4221	3.02577e-17
CCDC136	7q32.1	0.421972	3.1002e-17
TBCB	19q13.12	0.421612	3.31801e-17
BUD31	7q22.1	0.421435	3.43143e-17
HRAS	11p15.5	0.421321	3.50603e-17
CAP1	1p34.2	0.421264	3.54341e-17
IL15RA	10p15.1	0.421242	3.55857e-17
GARS	7p14.3	0.421009	3.71841e-17
LEPROTL1	8p12	0.421006	3.72047e-17
CCT7	2p13.2	0.420897	3.79783e-17
BIRC5	17q25.3	0.42088	3.80994e-17
GAL3ST4	7q22.1	0.420803	3.86535e-17
DBN1	5q35.3	0.420745	3.90783e-17
S100A3	1q21.3	0.420542	4.06064e-17
PIP5K1C	19p13.3	0.420472	4.11448e-17
PPP2R2C	4p16.1	0.419743	4.71885e-17
GRIN2D	19q13.33	0.419642	4.80918e-17
DPYSL4	10q26.3	0.419515	4.92521e-17
PLK1	16p12.2	0.419466	4.96996e-17
PITX1	5q31.1	0.419302	5.12522e-17
CCDC127	5p15.33	0.41929	5.13673e-17
NCF4	22q12.3	0.419216	5.20865e-17
NBL1	1p36.13	0.418915	5.51138e-17
ARL14	3q25.33	0.418873	5.55498e-17
CERS5	12q13.12	0.418757	5.67667e-17
KPNA2	17q24.2	0.418757	5.6767e-17
TNNT1	19q13.42	0.41828	6.20661e-17
RRAS	19q13.33	0.418263	6.22602e-17
ARHGAP4	Xq28	0.418256	6.23371e-17
RHOV	15q15.1	0.41787	6.70054e-17
STRA6	15q24.1	0.417754	6.8471e-17
LAIR1	19q13.42	0.417481	7.20385e-17
ACTB	7p22.1	0.417399	7.31526e-17
IER5L	9q34.11	0.417338	7.39899e-17
RAB38	11q14.2	0.416805	8.1704e-17
HSPBP1	19q13.42	0.416718	8.30302e-17
PAEP	9q34.3	0.41666	8.39389e-17
KDELR1	19q13.33	0.416546	8.57281e-17
YWHAB	20q13.12	0.416458	8.71468e-17
CD320	19p13.2	0.416405	8.79987e-17
DOK3	5q35.3	0.416027	9.44089e-17
PTP4A2	1p35.2	0.415047	1.13188e-16
ADORA3	1p13.2	0.414877	1.16796e-16
PAQR4	16p13.3	0.414867	1.17004e-16
KIAA1522	1p35.1	0.414222	1.31792e-16
DYNLT1	6q25.3	0.414012	1.37001e-16
ARPC5L	9q33.3	0.413381	1.53867e-16
DGKZ	11p11.2	0.413287	1.56541e-16
APCDD1L	20q13.32	0.413135	1.60992e-16
TYRO3	15q15.1	0.412675	1.75168e-16
CTXN1	19p13.2	0.412143	1.93122e-16
KMT5A	12q24.31	0.412108	1.94331e-16
OSCAR	19q13.42	0.412101	1.94609e-16
TNNI2	11p15.5	0.411775	2.06536e-16
FCGBP	19q13.2	0.41154	2.15606e-16
IFNGR2	21q22.11	0.411429	2.20017e-16
DPCD	10q24.32	0.411367	2.22549e-16
EIF3I	1p35.2	0.411016	2.37249e-16
PYGB	20p11.21	0.410918	2.41522e-16
NOL12	22q13.1	0.410762	2.48507e-16
TMEM158	3p21.31	0.410604	2.55745e-16
HLA-DMA	6p21.32	0.410439	2.63584e-16
MFSD2B	2p23.3	0.410237	2.73421e-16
MYBL2	20q13.12	0.410128	2.78891e-16
VDAC2	10q22.2	0.409952	2.87983e-16
HES4	1p36.33	0.40991	2.90168e-16
ATG101	12q13.13	0.4099	2.90685e-16
SOCS1	16p13.13	0.409879	2.91804e-16
PSMD8	19q13.2	0.409695	3.01759e-16
ASCL2	11p15.5	0.409546	3.09994e-16
LAMP5	20p12.2	0.409484	3.13502e-16
MRGBP	20q13.33	0.409468	3.14404e-16
PTGES2	9q34.11	0.409242	3.27582e-16
TREML3P	6p21.1	0.409232	3.28184e-16
PSMG3	7p22.3	0.409166	3.32149e-16
ANO9	11p15.5	0.408959	3.44801e-16
MRPL47	3q26.33	0.40844	3.788e-16
ACOT9	Xp22.11	0.408203	3.95336e-16
CCDC74A	2q21.1	0.408139	3.99942e-16
UBASH3B	11q24.1	0.407934	4.15035e-16
COA1	7p13	0.407861	4.20572e-16
IL27RA	19p13.12	0.407637	4.37911e-16
PGAM1	10q24.1	0.407515	4.47641e-16
PPP6R1	19q13.42	0.407287	4.66391e-16
TOR4A	9q34.3	0.407045	4.87137e-16
CYCS	7p15.3	0.40697	4.93768e-16
FAM110A	20p13	0.406923	4.98004e-16
SMARCD1	12q13.12	0.406826	5.06762e-16
MED27	9q34.13	0.406763	5.1255e-16
SLC6A6	3p25.1	0.40673	5.15603e-16
KIAA0930	22q13.31	0.406713	5.1711e-16
MAP3K6	1p36.11	0.406654	5.22636e-16
RPLP0P2	11q12.2	0.406602	5.27562e-16
DOK1	2p13.1	0.406529	5.34538e-16
TPM4	19p13.12-p13.11	0.406445	5.42663e-16
B3GNT3	19p13.11	0.406345	5.5253e-16
PRR14	16p11.2	0.406277	5.59297e-16
GAD1	2q31.1	0.405923	5.95949e-16
ACTR1A	10q24.32	0.405337	6.61932e-16
PACS1	11q13.1-q13.2	0.405052	6.96542e-16
ADGRB2	1p35.2	0.404905	7.15056e-16
CTHRC1	8q22.3	0.40481	7.27333e-16
SGPP2	2q36.1	0.404362	7.87819e-16
MUC13	3q21.2	0.404079	8.28646e-16
GRN	17q21.31	0.404064	8.30835e-16
ETV5	3q27.2	0.404006	8.39466e-16
TMEM156	4p14	0.403848	8.63381e-16
INO80E	16p11.2	0.403609	9.00903e-16
NUDC	1p36.11	0.403606	9.01413e-16
CCNB1	5q13.2	0.403399	9.35267e-16
TRIP13	5p15.33	0.40337	9.39959e-16
NANS	9q22.33	0.40333	9.4673e-16
EFNA3	1q21.3	0.403286	9.54255e-16
ZG16B	16p13.3	0.403268	9.57208e-16
ACTL8	1p36.13	0.402976	1.00826e-15
TUBA1A	12q13.12	0.402938	1.01493e-15
FOCAD	9p21.3	0.402872	1.02704e-15
BOLA3	2p13.1	0.402835	1.03379e-15
WDR13	Xp11.23	0.402835	1.03379e-15
PRRX2	9q34.11	0.402809	1.03843e-15
IER3	6p21.33	0.402682	1.06219e-15
NFKB2	10q24.32	0.402527	1.09177e-15
BATF3	1q32.3	0.402468	1.10331e-15
POP7	7q22.1	0.402313	1.13395e-15
PACC1	1q32.3	0.402206	1.15573e-15
DTYMK	2q37.3	0.401948	1.20962e-15
RBPJ	4p15.2	0.40194	1.2114e-15
RIPK2	8q21.3	0.401835	1.23416e-15
SPINK13	5q32	0.40174	1.25509e-15
BCL2A1	15q25.1	0.401694	1.26517e-15
EGF	4q25	0.401659	1.27302e-15
CAPG	2p11.2	0.40158	1.29102e-15
NOMO3	16p13.11	0.401393	1.33438e-15
SMIM20	4p15.2	0.401384	1.3364e-15
SERPINB6	6p25.2	0.401093	1.40697e-15
GTPBP4	10p15.3	0.400867	1.46419e-15
FKBP10	17q21.2	0.400801	1.48128e-15
PLXDC1	17q12	0.400736	1.49837e-15
PFN1	17p13.2	0.400635	1.52509e-15
UCK2	1q24.1	0.400421	1.58363e-15
PLTP	20q13.12	0.400198	1.64707e-15
DTNBP1	6p22.3	0.400196	1.64778e-15
SYK	9q22.2	0.400063	1.68659e-15
ZDHHC24	11q13.2	0.400026	1.69773e-15
MILR1	17q23.3	0.399983	1.71058e-15
CCNE1	19q12	0.399902	1.73501e-15
CDH17	8q22.1	0.399821	1.75999e-15
MUC1	1q22	0.399304	1.927e-15
PSMD13	11p15.5	0.399144	1.98192e-15
KXD1	19p13.11	0.398976	2.04109e-15
RHOT2	16p13.3	0.398883	2.07461e-15
ANXA2P2	9p13.3	0.398715	2.13639e-15
SLC6A10P	16p11.2	0.398159	2.35459e-15
TMCO4	1p36.13	0.397978	2.43018e-15
FIBCD1	9q34.12	0.39779	2.5114e-15
NDRG3	20q11.23	0.397659	2.56945e-15
RAB11FIP5	2p13.2	0.397593	2.59912e-15
SLC25A39	17q21.31	0.397381	2.69692e-15
BCAN	1q23.1	0.39736	2.70665e-15
C16ORF91	16p13.3	0.39729	2.7398e-15
ADA	20q13.12	0.39723	2.76868e-15
COPZ1	12q13.13	0.397085	2.83952e-15
CLSTN1	1p36.22	0.396949	2.90743e-15
E2F2	1p36.12	0.396814	2.97668e-15
DNER	2q36.3	0.39655	3.1165e-15
SPHK1	17q25.1	0.396518	3.13377e-15
TNFRSF4	1p36.33	0.396326	3.24022e-15
EEF1E1	6p24.3	0.396273	3.26987e-15
TRNAU1AP	1p35.3	0.396204	3.3095e-15
TMEM163	2q21.3	0.395912	3.48092e-15
PNKP	19q13.33	0.395899	3.4888e-15
HSF1	8q24.3	0.395823	3.53528e-15
METTL1	12q14.1	0.395777	3.56334e-15
BCL7C	16p11.2	0.395436	3.78031e-15
RASAL1	12q24.13	0.395042	4.04709e-15
TMEM132A	11q12.2	0.394912	4.13885e-15
PSMA5	1p13.3	0.394878	4.16342e-15
DAZAP1	19p13.3	0.394588	4.3773e-15
PTTG1	5q33.3	0.394465	4.47101e-15
RAB42	1p35.3	0.394445	4.48651e-15
PSMA7	20q13.33	0.394215	4.66747e-15
HDAC1	1p35.2-p35.1	0.394215	4.66787e-15
SLC25A19	17q25.1	0.394198	4.68187e-15
PRDX1	1p34.1	0.394185	4.69215e-15
PTGFRN	1p13.1	0.393864	4.95836e-15
NANOS3	19p13.12	0.393861	4.96099e-15
TNIP2	4p16.3	0.393849	4.97133e-15
PIGS	17q11.2	0.393647	5.1471e-15
CD300A	17q25.1	0.393564	5.22172e-15
TRPV2	17p11.2	0.393437	5.33705e-15
NME1	17q21.33	0.393321	5.44384e-15
HAPLN3	15q26.1	0.393259	5.50253e-15
POLR2G	11q12.3	0.392989	5.76314e-15
FBH1	10p15.1	0.392896	5.85636e-15
TRIM28	19q13.43	0.392721	6.03457e-15
TEDC2	16p13.3	0.392577	6.18583e-15
PDZD11	Xq13.1	0.392491	6.27792e-15
DCUN1D5	11q22.3	0.392348	6.43343e-15
PKP3	11p15.5	0.392306	6.4795e-15
JOSD2	19q13.33	0.392121	6.68827e-15
NRSN2	20p13	0.392086	6.72817e-15
GRAMD1B	11q24.1	0.391987	6.84303e-15
CCT2	12q15	0.391897	6.94919e-15
RHBDL2	1p34.3	0.391727	7.15404e-15
VDAC1	5q31.1	0.391294	7.70266e-15
STK11IP	2q35	0.390959	8.15582e-15
OLA1	2q31.1	0.390804	8.37472e-15
COTL1	16q24.1	0.390779	8.41063e-15
RFXANK	19p13.11	0.390767	8.42712e-15
MEAK7	16q24.1	0.390732	8.47752e-15
PIMREG	17p13.2	0.390697	8.52902e-15
KCNK12	2p16.3	0.390405	8.96251e-15
NPRL3	16p13.3	0.390358	9.03588e-15
TSPAN15	10q22.1	0.390348	9.05053e-15
PTP4A3	8q24.3	0.390321	9.09286e-15
PSMC3IP	17q21.2	0.390196	9.28833e-15
NDUFS5	1p34.3	0.390186	9.30342e-15
RBCK1	20p13	0.39016	9.34454e-15
PPM1G	2p23.3	0.390008	9.58868e-15
CHPF2	7q36.1	0.389851	9.84888e-15
COL22A1	8q24.23-q24.3	0.389785	9.95914e-15
PHF19	9q33.2	0.389771	9.98322e-15
CLIC3	9q34.3	0.389441	1.05585e-14
MYCBP	1p34.3	0.389208	1.0983e-14
HPSE	4q21.23	0.389146	1.10999e-14
DGUOK	2p13.1	0.389099	1.11882e-14
SMS	Xp22.11	0.389058	1.12664e-14
DDN	12q13.12	0.389017	1.13435e-14
ITGA3	17q21.33	0.388766	1.1836e-14
STARD3NL	7p14.1	0.388753	1.1863e-14
MSANTD3	9q31.1	0.388712	1.19449e-14
NUP62	19q13.33	0.388669	1.20322e-14
TMEM121B	22q11.1	0.388355	1.2689e-14
PML	15q24.1	0.388279	1.28524e-14
WDR34	9q34.11	0.388215	1.29929e-14
NPTX1	17q25.3	0.388163	1.31072e-14
SRSF9	12q24.31	0.388149	1.31371e-14
DNAJC5	20q13.33	0.388088	1.32729e-14
COPE	19p13.11	0.387976	1.35267e-14
TPM3	1q21.3	0.387901	1.36996e-14
TNFRSF21	6p12.3	0.387873	1.37637e-14
ZNF576	19q13.31	0.387782	1.39772e-14
TMEM50A	1p36.11	0.387765	1.40176e-14
YPEL4	11q12.1	0.387684	1.42089e-14
APOO	Xp22.11	0.387645	1.43046e-14
DNM1	9q34.11	0.387459	1.47582e-14
MIF	22q11.23	0.387425	1.48448e-14
CENPM	22q13.2	0.387141	1.55716e-14
TIMP1	Xp11.3	0.387139	1.55748e-14
SAE1	19q13.32	0.387136	1.55844e-14
DYNLRB1	20q11.22	0.386857	1.63325e-14
EIF3K	19q13.2	0.38673	1.66835e-14
NEIL3	4q34.3	0.386491	1.73669e-14
SSNA1	9q34.3	0.386238	1.81207e-14
ITPA	20p13	0.38619	1.82664e-14
STX6	1q25.3	0.386014	1.88157e-14
SLC38A5	Xp11.23	0.385907	1.91558e-14
CBX2	17q25.3	0.385865	1.929e-14
OGFRL1	6q13	0.38564	2.00313e-14
STX1A	7q11.23	0.385462	2.06371e-14
STAC3	12q13.3	0.385325	2.11171e-14
FGD3	9q22.31	0.385215	2.15078e-14
ITGAM	16p11.2	0.385159	2.17111e-14
TGFB1	19q13.2	0.38502	2.22186e-14
CC2D1B	1p32.3	0.384997	2.23042e-14
JAK3	19p13.11	0.384993	2.23197e-14
PRPH	12q13.12	0.384989	2.23347e-14
TINAG	6p12.1	0.384964	2.24275e-14
COMMD8	4p12	0.384829	2.29393e-14
SAPCD2	9q34.3	0.384681	2.35152e-14
SFT2D1	6q27	0.384556	2.401e-14
C1ORF54	1q21.2	0.384416	2.45771e-14
TRNP1	1p36.11	0.384351	2.48422e-14
UNC119	17q11.2	0.384034	2.61912e-14
ZNF205	16p13.3	0.383903	2.67695e-14
TONSL	8q24.3	0.383798	2.72379e-14
RRP12	10q24.1	0.383722	2.7585e-14
RAB31	18p11.22	0.38371	2.76401e-14
ADAM15	1q21.3	0.383652	2.79102e-14
ATP13A1	19p13.11	0.38363	2.80136e-14
EPO	7q22.1	0.383171	3.02315e-14
HSPA6	1q23.3	0.383148	3.03468e-14
EIF3CL	16p12.1	0.383073	3.07276e-14
RNF145	5q33.3	0.382954	3.13382e-14
CHCHD3	7q32.3-q33	0.382772	3.22995e-14
TCOF1	5q32-q33.1	0.382666	3.28717e-14
MMP12	11q22.2	0.382427	3.41977e-14
SRPX2	Xq22.1	0.382394	3.43871e-14
IL18	11q23.1	0.382378	3.44805e-14
CAPZB	1p36.13	0.382238	3.52845e-14
PGF	14q24.3	0.382182	3.56147e-14
RGS20	8q11.23	0.382004	3.66788e-14
UBXN11	1p36.11	0.38164	3.89502e-14
STK39	2q24.3	0.381521	3.97227e-14
TELO2	16p13.3	0.381521	3.97243e-14
EIF2S2	20q11.22	0.381438	4.02703e-14
RNASET2	6q27	0.381259	4.14823e-14
CRIP1	14q32.33	0.381033	4.30557e-14
SLC2A6	9q34.2	0.380967	4.35271e-14
RIT1	1q22	0.38079	4.48126e-14
NDUFB3	2q33.1	0.380745	4.51443e-14
CASC15	6p22.3	0.380668	4.57232e-14
FERMT3	11q13.1	0.380643	4.59091e-14
CD300C	17q25.1	0.380612	4.61437e-14
FHL3	1p34.3	0.380531	4.67656e-14
OLFML2B	1q23.3	0.380522	4.68372e-14
NIPSNAP2	7p11.2	0.380514	4.68919e-14
FCGR2A	1q23.3	0.380292	4.86391e-14
SFXN3	10q24.31	0.380155	4.97479e-14
KCTD17	22q12.3	0.379922	5.16856e-14
MTFR2	6q23.3	0.379878	5.20582e-14
OSBPL10	3p23	0.379796	5.2769e-14
LGALS3	14q22.3	0.379781	5.28997e-14
STK17A	7p13	0.379658	5.39746e-14
PPP1R14D	15q15.1	0.379279	5.74345e-14
GSDMC	8q24.21	0.379105	5.90917e-14
AAK1	2p13.3	0.37904	5.97246e-14
VSIG10L	19q13.41	0.378885	6.12605e-14
SNRPD1	18q11.2	0.378874	6.13675e-14
ELF4	Xq26.1	0.378831	6.18014e-14
ACPP	3q22.1	0.378754	6.25877e-14
RECQL4	8q24.3	0.378739	6.27385e-14
TMSB4XP8	4q22.1	0.378655	6.36064e-14
VPS37C	11q12.2	0.378644	6.37251e-14
DAB2	5p13.1	0.37864	6.37608e-14
C7ORF61	7q22.1	0.378134	6.92612e-14
ADAP2	17q11.2	0.378084	6.98242e-14
TXNDC17	17p13.1	0.378068	7.00056e-14
BCAS4	20q13.13	0.378051	7.01987e-14
ETV6	12p13.2	0.377987	7.09396e-14
NAP1L1	12q21.2	0.377831	7.27656e-14
PPIAL4G	1q21.2	0.377732	7.39459e-14
CPNE7	16q24.3	0.377705	7.42702e-14
MED22	9q34.2	0.377671	7.46828e-14
SPATC1L	21q22.3	0.377652	7.49214e-14
PTPN6	12p13.31	0.377462	7.72747e-14
TOMM5	9p13.2	0.377421	7.77843e-14
CCDC137	17q25.3	0.377072	8.2338e-14
TANGO2	22q11.21	0.376547	8.96562e-14
PA2G4	12q13.2	0.376472	9.07553e-14
CCDC9	19q13.32	0.376462	9.09089e-14
FXYD5	19q13.12	0.376425	9.14505e-14
POP4	19q12	0.376381	9.21059e-14
SLC4A11	20p13	0.376289	9.34922e-14
H2AFX	11q23.3	0.376263	9.38926e-14
TNFAIP6	2q23.3	0.376149	9.56458e-14
STX3	11q12.1	0.376114	9.61808e-14
CCND3	6p21.1	0.376093	9.65094e-14
FAM49B	8q24.21	0.376066	9.69312e-14
SMPD2	6q21	0.376027	9.75516e-14
NME3	16p13.3	0.375974	9.83847e-14
ATAD3A	1p36.33	0.37594	9.89344e-14
GNB2	7q22.1	0.375893	9.96862e-14
CYTH2	19q13.33	0.375809	1.01054e-13
PRELID3A	18p11.21	0.375693	1.02962e-13
MINDY4	7p14.3	0.375682	1.03155e-13
CCDC96	4p16.1	0.375559	1.05224e-13
ORC1	1p32.3	0.375544	1.05486e-13
PPP1R18	6p21.33	0.375393	1.08093e-13
FER1L4	20q11.22	0.375335	1.09101e-13
PFKFB4	3p21.31	0.375241	1.10774e-13
KY	3q22.2	0.375131	1.12767e-13
MICALL2	7p22.3	0.375115	1.13059e-13
RGS1	1q31.2	0.375023	1.14747e-13
AP5Z1	7p22.1	0.374845	1.18095e-13
AGRN	1p36.33	0.374793	1.19083e-13
PNMA1	14q24.3	0.374788	1.19186e-13
CCDC74B	2q21.1	0.37476	1.19714e-13
GLIPR2	9p13.3	0.374709	1.20711e-13
ANKRD22	10q23.31	0.374703	1.20828e-13
CATSPER1	11q13.1	0.374691	1.21049e-13
SPINDOC	11q13.1	0.374566	1.23514e-13
RSPH1	21q22.3	0.374431	1.26245e-13
MX2	21q22.3	0.374414	1.26587e-13
PSMC4	19q13.2	0.374299	1.28954e-13
PPIAL4C	1q21.2	0.374256	1.29843e-13
MMP1	11q22.2	0.374175	1.3155e-13
MLKL	16q23.1	0.374145	1.3219e-13
GNB1	1p36.33	0.3737	1.41984e-13
EPN3	17q21.33	0.373653	1.4306e-13
LILRB4	19q13.42	0.373604	1.44207e-13
LGALS9C	17p11.2	0.373075	1.5697e-13
PGLS	19p13.11	0.373028	1.58163e-13
PIGU	20q11.22	0.37295	1.60164e-13
PCLAF	15q22.31	0.372733	1.6583e-13
MYPOP	19q13.32	0.37272	1.66175e-13
PPP2R3A	3q22.2-q22.3	0.372702	1.66651e-13
SLCO4A1	20q13.33	0.372564	1.70356e-13
EDC4	16q22.1	0.372548	1.70796e-13
HSPA12A	10q25.3	0.372504	1.71998e-13
LRP10	14q11.2	0.372493	1.72318e-13
FLYWCH1	16p13.3	0.372492	1.72349e-13
CARD14	17q25.3	0.372342	1.76515e-13
RIMBP3	22q11.21	0.372313	1.77345e-13
RELB	19q13.32	0.372304	1.7761e-13
CYTH4	22q13.1	0.372182	1.81112e-13
OXTR	3p25.3	0.371794	1.92692e-13
FMNL1	17q21.31	0.371748	1.94089e-13
SNRPA1	15q26.3	0.371739	1.94377e-13
ZNF446	19q13.43	0.371673	1.96445e-13
TBX19	1q24.2	0.371662	1.96783e-13
TIMM17B	Xp11.23	0.371659	1.96883e-13
COX4I1	16q24.1	0.37144	2.03887e-13
EFTUD2	17q21.31	0.37132	2.07803e-13
TMEM201	1p36.22	0.371291	2.08784e-13
POC5	5q13.3	0.371207	2.11589e-13
PSMB8	6p21.32	0.37118	2.12507e-13
MAZ	16p11.2	0.371095	2.15393e-13
UBE2T	1q32.1	0.371093	2.1546e-13
MCU	10q22.1	0.37107	2.16251e-13
CTRL	16q22.1	0.370867	2.23371e-13
ADAMTS14	10q22.1	0.370664	2.30678e-13
FAM81A	15q22.2	0.370604	2.32891e-13
CDC25B	20p13	0.370415	2.40004e-13
GYS1	19q13.33	0.370369	2.41774e-13
NRM	6p21.33	0.370349	2.42536e-13
MLLT3	9p21.3	0.370326	2.43405e-13
OAZ3	1q21.3	0.37026	2.45973e-13
SIGLEC9	19q13.41	0.370008	2.56035e-13
GPC2	7q22.1	0.369985	2.5697e-13
OBSCN	1q42.13	0.369871	2.61641e-13
NCKAP5L	12q13.12	0.369691	2.69205e-13
AIF1	6p21.33	0.369638	2.71486e-13
CSTB	21q22.3	0.369472	2.78739e-13
FXYD3	19q13.12	0.369376	2.82971e-13
NEFH	22q12.2	0.369317	2.85665e-13
FUCA2	6q24.2	0.369271	2.87715e-13
ACAN	15q26.1	0.369069	2.97075e-13
POMP	13q12.3	0.369069	2.971e-13
ABCF2	7q36.1	0.369063	2.97364e-13
SMCO2	12p11.23	0.368947	3.02865e-13
SERPINB1	6p25.2	0.368837	3.08156e-13
TPCN1	12q24.13	0.368811	3.09441e-13
WDR62	19q13.12	0.368679	3.15957e-13
CCDC43	17q21.31	0.368549	3.22507e-13
TMEM164	Xq23	0.368521	3.23943e-13
MAP2K2	19p13.3	0.368419	3.29216e-13
RAD54L	1p34.1	0.368191	3.41276e-13
EPDR1	7p14.1	0.36819	3.41289e-13
TMEM74B	20p13	0.368151	3.43416e-13
FOXK2	17q25.3	0.368087	3.46917e-13
KCNMB4	12q15	0.368077	3.47454e-13
CDT1	16q24.3	0.367983	3.5261e-13
ECEL1	2q37.1	0.367807	3.62562e-13
CCT4	2p15	0.367675	3.70141e-13
WASF2	1p36.11	0.367668	3.70583e-13
CORO1B	11q13.2	0.36737	3.88314e-13
FOXL1	16q24.1	0.367295	3.92924e-13
BZW2	7p21.1	0.367238	3.9645e-13
NTRK1	1q23.1	0.367051	4.08309e-13
RAC2	22q13.1	0.366938	4.15581e-13
PLB1	2p23.2	0.366896	4.18352e-13
COL11A1	1p21.1	0.36679	4.25374e-13
IL2RA	10p15.1	0.366643	4.3529e-13
CHRDL2	11q13.4	0.366592	4.38806e-13
ATIC	2q35	0.366418	4.50917e-13
EID3	12q23.3	0.366308	4.5879e-13
PSORS1C1	6p21.33	0.366295	4.59685e-13
N4BP3	5q35.3	0.366255	4.62597e-13
DPF1	19q13.2	0.36606	4.7694e-13
EPS8L3	1p13.3	0.366044	4.78137e-13
SCG2	2q36.1	0.366021	4.7983e-13
KLF16	19p13.3	0.365905	4.88663e-13
ATXN2L	16p11.2	0.365819	4.95235e-13
UBE2Z	17q21.32	0.365794	4.97152e-13
TRAPPC1	17p13.1	0.365714	5.0347e-13
CCT3	1q22	0.365591	5.1323e-13
IL2RG	Xq13.1	0.365554	5.16202e-13
PRELID1	5q35.3	0.365535	5.17684e-13
RRP36	6p21.1	0.365195	5.45965e-13
SFPQ	1p34.3	0.365182	5.47059e-13
PITX2	4q25	0.365166	5.48379e-13
GPN2	1p36.11	0.364928	5.69169e-13
PDE6B	4p16.3	0.364915	5.70302e-13
HTRA3	4p16.1	0.364702	5.89529e-13
PKD1L2	16q23.2	0.364575	6.01302e-13
MED10	5p15.31	0.364527	6.05814e-13
TFF2	21q22.3	0.364492	6.09156e-13
NECAP2	1p36.13	0.364398	6.18108e-13
RNASEK	17p13.1	0.364089	6.48513e-13
DTX2	7q11.23	0.364081	6.49377e-13
GALNT7	4q34.1	0.363924	6.65376e-13
OTULINL	5p15.2	0.36388	6.69919e-13
RAD51	15q15.1	0.363845	6.73648e-13
KCTD10	12q24.11	0.363727	6.86098e-13
TRAPPC3	1p34.3	0.363708	6.88058e-13
ADRM1	20q13.33	0.36369	6.89969e-13
RBM45	2q31.2	0.363686	6.90415e-13
C11ORF49	11p11.2	0.363636	6.95812e-13
C9ORF16	9q34.11	0.363619	6.97611e-13
SIGLEC10	19q13.41	0.363612	6.98433e-13
LENG9	19q13.42	0.363543	7.05979e-13
NOP56	20p13	0.36323	7.41034e-13
ANKS3	16p13.3	0.363126	7.53102e-13
TSEN34	19q13.42	0.362931	7.7611e-13
FAM90A1	12p13.31	0.362836	7.87619e-13
DENND6B	22q13.33	0.362653	8.10227e-13
APEX2	Xp11.21	0.362648	8.10871e-13
PPP1CA	11q13.2	0.362644	8.11344e-13
MSC	8q13.3	0.362631	8.13022e-13
HSH2D	19p13.11	0.362609	8.15825e-13
EIF4A1	17p13.1	0.362593	8.17818e-13
TUBB6	18p11.21	0.362454	8.35571e-13
DLL3	19q13.2	0.362421	8.39797e-13
CDK4	12q14.1	0.362284	8.57854e-13
TCIRG1	11q13.2	0.362088	8.84151e-13
HOPX	4q12	0.362075	8.8589e-13
ALOX5AP	13q12.3	0.362071	8.86492e-13
RAVER1	19p13.2	0.361934	9.0544e-13
GULP1	2q32.1-q32.2	0.361871	9.14228e-13
RHBDF2	17q25.1	0.361869	9.14544e-13
COX8A	11q13.1	0.361778	9.27545e-13
MED15	22q11.21	0.361641	9.47243e-13
PHETA1	12q24.12	0.361588	9.55063e-13
EIF3B	7p22.3	0.361488	9.69942e-13
CFAP45	1q23.2	0.361483	9.70561e-13
YDJC	22q11.21	0.361477	9.71588e-13
ABR	17p13.3	0.361464	9.73531e-13
SLC6A3	5p15.33	0.361394	9.83945e-13
GSTP1	11q13.2	0.361334	9.93209e-13
ADGRF4	6p12.3	0.361243	1.0071e-12
RHOQ	2p21	0.361227	1.0097e-12
SLC7A6	16q22.1	0.361159	1.02024e-12
SH2B2	7q22.1	0.361141	1.02309e-12
CBR3	21q22.12	0.361136	1.0239e-12
TMEM159	16p12.3	0.361036	1.03967e-12
PSMB9	6p21.32	0.360856	1.06894e-12
PSMB10	16q22.1	0.360813	1.07596e-12
UBE2J2	1p36.33	0.360702	1.09453e-12
CENPH	5q13.2	0.360667	1.10047e-12
PLEKHG2	19q13.2	0.360634	1.10599e-12
RUVBL1	3q21.3	0.360631	1.10657e-12
CCDC149	4p15.2	0.360447	1.1382e-12
ASPHD1	16p11.2	0.360246	1.1739e-12
RNASE6	14q11.2	0.360118	1.19705e-12
NCS1	9q34.11	0.360089	1.20236e-12
RRAD	16q22.1	0.35999	1.22081e-12
TM4SF19	3q29	0.359791	1.25868e-12
TOX	8q12.1	0.359756	1.26541e-12
YBX3	12p13.2	0.359687	1.27875e-12
RASA3	13q34	0.359657	1.28475e-12
ELOC	8q21.11	0.359634	1.28918e-12
PLA2G15	16q22.1	0.359574	1.30107e-12
NME6	3p21.31	0.3595	1.31588e-12
EPHB3	3q27.1	0.359486	1.31873e-12
COX6B1	19q13.12	0.359462	1.32352e-12
UNC13D	17q25.1	0.359419	1.33232e-12
C2CD4A	15q22.2	0.359267	1.36375e-12
MPP3	17q21.31	0.359147	1.38886e-12
NCF2	1q25.3	0.359103	1.39834e-12
TAF6	7q22.1	0.358923	1.43712e-12
TIMM22	17p13.3	0.358913	1.43943e-12
CTSA	20q13.12	0.358829	1.45799e-12
MYL6B	12q13.2	0.358774	1.47035e-12
HCFC1R1	16p13.3	0.358682	1.49103e-12
CD86	3q13.33	0.358565	1.51798e-12
DENND2D	1p13.3-p13.2	0.358378	1.56174e-12
SUPT5H	19q13.2	0.358252	1.59214e-12
CACNB3	12q13.12	0.358228	1.59779e-12
KIF3C	2p23.3	0.358198	1.60525e-12
NFE2L3	7p15.2	0.358183	1.60884e-12
NRIP3	11p15.4	0.358138	1.61983e-12
GALNS	16q24.3	0.35809	1.6319e-12
SLC39A1	1q21.3	0.358044	1.64337e-12
CLEC5A	7q34	0.358034	1.64568e-12
SH2D5	1p36.12	0.357939	1.66968e-12
RDH13	19q13.42	0.35791	1.67719e-12
ADAM28	8p21.2	0.357905	1.67835e-12
UBE2C	20q13.12	0.357836	1.69596e-12
PDK3	Xp22.11	0.35774	1.72113e-12
DUOXA2	15q21.1	0.357368	1.82102e-12
FLYWCH2	16p13.3	0.357175	1.87531e-12
MTA2	11q12.3	0.35716	1.87955e-12
CD70	19p13.3	0.356895	1.95645e-12
TNFAIP8L2	1q21.3	0.356829	1.97627e-12
SERPINH1	11q13.5	0.356817	1.97972e-12
ASF1B	19p13.12	0.356554	2.06012e-12
NDUFS8	11q13.2	0.356426	2.10058e-12
CMTM3	16q22.1	0.356394	2.1108e-12
NDUFA8	9q33.2	0.356393	2.11095e-12
C1ORF122	1p34.3	0.356343	2.12704e-12
ZYX	7q34	0.356295	2.14245e-12
LINC00265	7p14.1	0.356219	2.16729e-12
FAM155B	Xq13.1	0.356217	2.16816e-12
AP2S1	19q13.32	0.35619	2.1769e-12
IL20RB	3q22.3	0.356177	2.18125e-12
FAM214B	9p13.3	0.356142	2.19267e-12
CENPO	2p23.3	0.356078	2.21407e-12
EDA	Xq13.1	0.356038	2.22741e-12
HID1	17q25.1	0.356001	2.23997e-12
IGLON5	19q13.41	0.355953	2.25612e-12
GBP2	1p22.2	0.355897	2.27553e-12
C1ORF159	1p36.33	0.355844	2.2936e-12
FAM192A	16q13	0.355822	2.30132e-12
CENPA	2p23.3	0.355745	2.32836e-12
TOMM34	20q13.12	0.355686	2.34918e-12
ADGRE2	19p13.12	0.355582	2.38611e-12
PSMD9	12q24.31	0.355578	2.38775e-12
RFC2	7q11.23	0.355557	2.39535e-12
SOGA1	20q11.23	0.355516	2.41016e-12
C1QB	1p36.12	0.3555	2.41595e-12
AMZ2	17q24.2	0.355489	2.41979e-12
CERCAM	9q34.11	0.355463	2.42958e-12
DENND3	8q24.3	0.35539	2.4565e-12
NCF1	7q11.23	0.35524	2.5126e-12
SNRPB	20p13	0.355219	2.52049e-12
GPRIN1	5q35.2	0.355106	2.56383e-12
ZBTB8OS	1p35.1	0.355092	2.56899e-12
AFAP1-AS1	4p16.1	0.35503	2.59332e-12
LBHD1	11q12.3	0.354945	2.62682e-12
ADAT3	19p13.3	0.354913	2.63953e-12
YIF1B	19q13.2	0.354815	2.67851e-12
EEF2KMT	16p13.3	0.354803	2.68324e-12
DNAJB13	11q13.4	0.354799	2.6849e-12
HM13	20q11.21	0.354769	2.69711e-12
ITGB1BP1	2p25.1	0.354724	2.71535e-12
C1QA	1p36.12	0.354577	2.77608e-12
FAM104A	17q25.1	0.354524	2.79837e-12
TPM2	9p13.3	0.35444	2.83386e-12
LOXL3	2p13.1	0.354424	2.84096e-12
AUNIP	1p36.11	0.354322	2.88479e-12
HSPB8	12q24.23	0.353967	3.04269e-12
THOC6	16p13.3	0.353866	3.08896e-12
STC2	5q35.2	0.353863	3.09032e-12
SLC66A1L	3q25.32	0.353844	3.09929e-12
TEDC1	14q32.33	0.353813	3.11343e-12
AREG	4q13.3	0.353756	3.1402e-12
CARMIL1	6p22.2	0.353718	3.15842e-12
TK1	17q25.3	0.353651	3.19032e-12
DRAM1	12q23.2	0.353628	3.20134e-12
TMEM44	3q29	0.353625	3.20275e-12
LINC00336	6p21.31	0.353351	3.33664e-12
BAX	19q13.33	0.353283	3.37076e-12
PDCD6	5p15.33	0.353275	3.37483e-12
RP9P	7p14.3	0.353255	3.38498e-12
TWF2	3p21.2	0.353228	3.39852e-12
CRYAB	11q23.1	0.353208	3.40899e-12
SLAMF8	1q23.2	0.353039	3.49594e-12
AURKB	17p13.1	0.352944	3.54632e-12
RILPL1	12q24.31	0.352872	3.58426e-12
TMEM189	20q13.13	0.35283	3.60728e-12
PCED1B	12q13.11	0.352812	3.6168e-12
SPATS2	12q13.12	0.352405	3.84312e-12
SF3B5	6q24.2	0.352376	3.85999e-12
CIZ1	9q34.11	0.352303	3.90222e-12
B3GAT3	11q12.3	0.352184	3.97219e-12
CPXM1	20p13	0.352021	4.06987e-12
NQO1	16q22.1	0.351979	4.09532e-12
ITGB2	21q22.3	0.351967	4.10265e-12
ICAM1	19p13.2	0.351943	4.11763e-12
LRRC25	19p13.11	0.351905	4.14066e-12
TUBB4B	9q34.3	0.351843	4.17917e-12
TRAPPC2L	16q24.3	0.35177	4.22495e-12
CRABP2	1q23.1	0.351757	4.23276e-12
ALOX5	10q11.21	0.351701	4.26827e-12
CYP2S1	19q13.2	0.35168	4.28197e-12
HMGXB3	5q32	0.35144	4.4375e-12
VTCN1	1p13.1-p12	0.351343	4.5018e-12
THAP4	2q37.3	0.351195	4.60221e-12
SEMA4A	1q22	0.351141	4.63885e-12
2021-03-03	5q23.2	0.351086	4.67728e-12
PIM3	22q13.33	0.351021	4.72279e-12
DNAJC18	5q31.2	0.35097	4.75827e-12
DRP2	Xq22.1	0.350796	4.88304e-12
C12ORF75	12q23.3	0.350687	4.96254e-12
CLCN7	16p13.3	0.350683	4.96525e-12
ANXA11	10q22.3	0.35057	5.04956e-12
IL17B	5q32	0.350559	5.05751e-12
MAGED4	Xp11.22	0.350489	5.10989e-12
MRPS23	17q22	0.350478	5.11815e-12
XPNPEP1	10q25.1	0.350417	5.16495e-12
SLC7A11	4q28.3	0.350273	5.27631e-12
NIBAN2	9q34.11	0.350176	5.35268e-12
TRIM16	17p12	0.350164	5.36219e-12
CHAF1B	21q22.12-q22.13	0.350111	5.40411e-12
LARP4B	10p15.3	0.350039	5.46196e-12
PPP1R9B	17q21.33	0.349963	5.52401e-12
SLC37A1	21q22.3	0.349828	5.63557e-12
SNHG12	1p35.3	0.349824	5.63834e-12
CREB3L1	11p11.2	0.349651	5.78481e-12
PLXNA3	Xq28	0.349607	5.82246e-12
URM1	9q34.11	0.349539	5.88119e-12
GDI1	Xq28	0.349517	5.90078e-12
FTH1	11q12.3	0.349463	5.94766e-12
DHRS13	17q11.2	0.349453	5.95636e-12
DPP3	11q13.2	0.349439	5.96876e-12
MAFG-DT	17q25.3	0.34915	6.22841e-12
C14ORF119	14q11.2	0.349115	6.26087e-12
MATK	19p13.3	0.348955	6.41014e-12
TALDO1	11p15.5	0.348766	6.59157e-12
ACTG1	17q25.3	0.348751	6.60584e-12
SF3B4	1q21.2	0.348699	6.65699e-12
ARHGEF16	1p36.32	0.348628	6.72654e-12
SEMA4D	9q22.2	0.348597	6.75777e-12
CIDEC	3p25.3	0.348433	6.92254e-12
FBLIM1	1p36.21	0.348383	6.97386e-12
HAVCR1	5q33.3	0.348353	7.00449e-12
CD300LF	17q25.1	0.3483	7.05897e-12
CD74	5q33.1	0.348154	7.21224e-12
CENPW	6q22.32	0.347932	7.45128e-12
ARNTL2	12p11.23	0.347884	7.50434e-12
RBM17	10p15.1	0.347745	7.65865e-12
ALDH3B1	11q13.2	0.347735	7.67054e-12
MARCKS	6q21	0.347732	7.67384e-12
MMP10	11q22.2	0.347643	7.77462e-12
KHDRBS1	1p35.2	0.347641	7.77621e-12
OSM	22q12.2	0.347576	7.85101e-12
COPG1	3q21.3	0.347567	7.86126e-12
CXCL5	4q13.3	0.347358	8.10603e-12
ATG4D	19p13.2	0.347205	8.2899e-12
TXNDC12	1p32.3	0.347092	8.42771e-12
FAM241B	10q22.1	0.347073	8.4519e-12
PFDN2	1q23.3	0.347034	8.49959e-12
SULT1C2	2q12.3	0.346985	8.56107e-12
LSM4	19p13.11	0.346974	8.57482e-12
CIAO2B	16q22.1	0.346768	8.8376e-12
FAM227A	22q13.1	0.346763	8.84434e-12
ATP6V1H	8q11.23	0.346759	8.849e-12
DDIT3	12q13.3	0.346744	8.86834e-12
KCNN4	19q13.31	0.34637	9.36625e-12
B3GNT9	16q22.1	0.34633	9.42204e-12
GPD1L	3p22.3	0.346299	9.46408e-12
WDR4	21q22.3	0.346264	9.5129e-12
ABHD11-AS1	7q11.23	0.345984	9.90985e-12
CIP2A	3q13.13	0.345946	9.96457e-12
MTHFD2	2p13.1	0.345946	9.96457e-12
ZNF579	19q13.42	0.345921	1.00016e-11
ATP5MF	7q22.1	0.345867	1.00799e-11
ASRGL1	11q12.3	0.345779	1.021e-11
EPS8L1	19q13.42	0.345748	1.02562e-11
CRYBB1	22q12.1	0.345728	1.02858e-11
HLA-DMB	6p21.32	0.34569	1.03438e-11
POPDC3	6q21	0.345664	1.03827e-11
DNASE1	16p13.3	0.345601	1.04789e-11
CDC6	17q21.2	0.34548	1.0665e-11
UNC45A	15q26.1	0.345424	1.07512e-11
U2AF2	19q13.42	0.345402	1.07861e-11
ATRAID	2p23.3	0.345288	1.0967e-11
SLC41A3	3q21.2-q21.3	0.34526	1.1012e-11
ATP5F1E	20q13.32	0.345177	1.11445e-11
CD101	1p13.1	0.345106	1.12606e-11
MAP1S	19p13.11	0.345053	1.13476e-11
TLE3	15q23	0.34501	1.14199e-11
ZNF469	16q24.2	0.344926	1.15601e-11
PAGR1	16p11.2	0.344845	1.16957e-11
COMTD1	10q22.2	0.344699	1.19469e-11
GPR35	2q37.3	0.344616	1.20912e-11
CDCA3	12p13.31	0.344587	1.21433e-11
CACNB1	17q12	0.34458	1.21558e-11
ST6GALNAC5	1p31.1	0.344567	1.21787e-11
DAGLA	11q12.2	0.344442	1.24008e-11
ACYP1	14q24.3	0.344351	1.25647e-11
LMTK3	19q13.33	0.34429	1.26771e-11
ARHGAP39	8q24.3	0.344287	1.26832e-11
SLC66A1	1p36.13	0.344111	1.30097e-11
FAP	2q24.2	0.343931	1.33538e-11
MEIS3	19q13.32	0.343616	1.39759e-11
PHEX	Xp22.11	0.343472	1.42715e-11
CAPN10	2q37.3	0.343425	1.43688e-11
HCAR2	12q24.31	0.343421	1.43765e-11
BRI3BP	12q24.31	0.343333	1.45602e-11
CYREN	7q33	0.343177	1.48917e-11
BRIX1	5p13.2	0.343169	1.49091e-11
AKR1C3	10p15.1	0.34301	1.5256e-11
HKDC1	10q22.1	0.342954	1.53788e-11
VAV1	19p13.3	0.342875	1.55557e-11
CDSN	6p21.33	0.342868	1.55716e-11
CLIP2	7q11.23	0.342756	1.58242e-11
SLC35F2	11q22.3	0.342747	1.58457e-11
TRAIP	3p21.31	0.342707	1.59369e-11
EME1	17q21.33	0.342688	1.59802e-11
LYPLA2	1p36.11	0.342662	1.604e-11
ABHD12	20p11.21	0.342629	1.61161e-11
MMD	17q22	0.342622	1.6132e-11
CERS1	19p13.11	0.342607	1.61677e-11
LY86	6p25.1	0.342598	1.61879e-11
APOBR	16p12.1	0.342576	1.62411e-11
C4ORF47	4q35.1	0.342566	1.62625e-11
HK3	5q35.2	0.342513	1.63883e-11
CLCF1	11q13.2	0.342507	1.64028e-11
ACOT7	1p36.31	0.342492	1.64374e-11
SNN	16p13.13	0.342384	1.6695e-11
DMAC2	19q13.2	0.342383	1.66991e-11
HRK	12q24.22	0.342259	1.69983e-11
ARHGAP1	11p11.2	0.34223	1.70691e-11
CCDC28B	1p35.2	0.342203	1.71356e-11
IRF3	19q13.33	0.342183	1.71849e-11
TCAF2	7q35	0.342073	1.74593e-11
BATF	14q24.3	0.342004	1.76335e-11
BNIP1	5q35.1	0.341731	1.83388e-11
GFPT2	5q35.3	0.341671	1.84988e-11
NTMT1	9q34.11	0.341617	1.86423e-11
SCNM1	1q21.3	0.341467	1.90481e-11
SMARCA4	19p13.2	0.341448	1.91004e-11
FUS	16p11.2	0.341362	1.93375e-11
CD24	6q21	0.341305	1.94947e-11
PERM1	1p36.33	0.341163	1.98979e-11
POLR3D	8p21.3	0.341161	1.99019e-11
WNT10A	2q35	0.341145	1.99476e-11
WDR1	4p16.1	0.341053	2.02122e-11
LMNA	1q22	0.341052	2.02157e-11
ARMCX6	Xq22.1	0.340978	2.04324e-11
PLPP2	19p13.3	0.340903	2.06505e-11
TFE3	Xp11.23	0.340875	2.07347e-11
P3H1	1p34.2	0.34077	2.1048e-11
PPP1R15A	19q13.33	0.340648	2.14192e-11
KIF22	16p11.2	0.340612	2.15312e-11
MAD2L1	4q27	0.340504	2.1867e-11
NDUFAF4	6q16.1	0.340488	2.1916e-11
COL16A1	1p35.2	0.340405	2.21786e-11
ANXA2P1	4q31.3	0.340253	2.26646e-11
TRPC3	4q27	0.340241	2.27028e-11
SPACA6	19q13.41	0.340228	2.2744e-11
ARHGAP17	16p12.1	0.340166	2.29477e-11
CBX3	7p15.2	0.34013	2.30659e-11
CD58	1p13.1	0.340099	2.31669e-11
PLEKHA8P1	12q12	0.340005	2.34824e-11
C2ORF70	2p23.3	0.339849	2.40086e-11
TRIM11	1q42.13	0.339557	2.50308e-11
KHDC1	6q13	0.339374	2.56904e-11
KCNQ1	11p15.5-p15.4	0.339346	2.57964e-11
CAPZA1	1p13.2	0.339297	2.5975e-11
TESK1	9p13.3	0.338949	2.72939e-11
NXT1	20p11.21	0.33893	2.73681e-11
MMP7	11q22.2	0.338902	2.74772e-11
GPSM3	6p21.32	0.338859	2.76457e-11
PRXL2B	1p36.32	0.338801	2.78737e-11
SFN	1p36.11	0.338759	2.80406e-11
MTMR2	11q21	0.338739	2.81201e-11
HLA-A	6p22.1	0.338739	2.8122e-11
IST1	16q22.2	0.338644	2.85041e-11
OSBPL7	17q21.32	0.338462	2.92488e-11
PVT1	8q24.21	0.338405	2.9489e-11
NMB	15q25.2	0.338378	2.96004e-11
UGT1A10	2q37.1	0.338338	2.97677e-11
MFAP2	1p36.13	0.338313	2.9876e-11
STX18	4p16.3-p16.2	0.338286	2.99885e-11
TNFAIP8	5q23.1	0.338154	3.05549e-11
TRAF7	16p13.3	0.338089	3.08383e-11
MISP	19p13.3	0.338039	3.10579e-11
VPS18	15q15.1	0.337917	3.15995e-11
TAF10	11p15.4	0.337907	3.16428e-11
DKKL1	19q13.33	0.337841	3.19403e-11
HNRNPAB	5q35.3	0.337789	3.21779e-11
KRT17	17q21.2	0.337731	3.24447e-11
DHDH	19q13.33	0.337684	3.26613e-11
TIMM50	19q13.2	0.337641	3.28585e-11
SOX4	6p22.3	0.337494	3.3552e-11
LAMTOR4	7q22.1	0.337475	3.36392e-11
ANXA2P3	10q21.3	0.33744	3.38091e-11
P3H3	12p13.31	0.337426	3.3877e-11
TNFRSF8	1p36.22	0.337342	3.42772e-11
CSF2RA	Xp22.33 and Yp11.2	0.337328	3.43498e-11
STXBP2	19p13.2	0.337201	3.49686e-11
GNAZ	22q11.22-q11.23	0.337142	3.52638e-11
MAST2	1p34.1	0.337104	3.54509e-11
C1QC	1p36.12	0.337009	3.59321e-11
ARMC9	2q37.1	0.336871	3.66393e-11
WDR77	1p13.2	0.336755	3.72455e-11
VWA5A	11q24.2	0.33673	3.73769e-11
PDE4A	19p13.2	0.336695	3.7558e-11
ASPHD2	22q12.1	0.336682	3.76268e-11
PDZD7	10q24.31	0.33664	3.78546e-11
CCZ1	7p22.1	0.336628	3.7915e-11
ISL2	15q24.3	0.336604	3.80452e-11
DCAF13	8q22.3	0.336591	3.81157e-11
RHNO1	12p13.33	0.33653	3.8446e-11
NAT8L	4p16.3	0.336528	3.84537e-11
CHI3L2	1p13.2	0.336513	3.85365e-11
UBL4A	Xq28	0.33644	3.89332e-11
TUBG1	17q21.2	0.336436	3.89547e-11
PSMA1	11p15.2	0.336158	4.05121e-11
RBX1	22q13.2	0.335918	4.19031e-11
POP1	8q22.2	0.335916	4.19146e-11
SYCE1L	16q23.1	0.335713	4.31279e-11
CCNF	16p13.3	0.335596	4.38473e-11
PLAC1	Xq26.3	0.335535	4.42209e-11
CCNQ	Xq28	0.335436	4.48397e-11
TPBG	6q14.1	0.335193	4.63984e-11
NFATC4	14q12	0.335159	4.66179e-11
ELOB	16p13.3	0.335146	4.67012e-11
KCNK9	8q24.3	0.335129	4.68179e-11
ARHGEF2	1q22	0.33502	4.7539e-11
ADAM8	10q26.3	0.334926	4.81646e-11
BASP1	5p15.1	0.334923	4.81851e-11
PTTG3P	8q13.1	0.334869	4.8555e-11
PPP1R14C	6q25.1	0.334866	4.85773e-11
SLC25A3	12q23.1	0.334852	4.86678e-11
DPH2	1p34.1	0.334747	4.93941e-11
GLG1	16q23.1	0.334525	5.09537e-11
TEX19	17q25.3	0.334467	5.1363e-11
KREMEN2	16p13.3	0.334292	5.26416e-11
SLC37A2	11q24.2	0.334249	5.2953e-11
ICAM4	19p13.2	0.334203	5.32948e-11
RUBCNL	13q14.13	0.334138	5.37838e-11
FAAP20	1p36.33	0.334135	5.38078e-11
COX7C	5q14.3	0.334073	5.42737e-11
PTHLH	12p11.22	0.333956	5.51661e-11
LSM8	7q31.31	0.333921	5.54422e-11
WSB2	12q24.23	0.333854	5.59639e-11
E2F3	6p22.3	0.333842	5.60539e-11
CLLU1OS	12q22	0.333834	5.61137e-11
CCNJL	5q33.3	0.333816	5.62557e-11
SLCO5A1	8q13.3	0.333812	5.62869e-11
CSF1R	5q32	0.333769	5.66275e-11
RABIF	1q32.1	0.333731	5.69321e-11
STRN4	19q13.32	0.333664	5.74672e-11
CACNA1G	17q21.33	0.333654	5.75449e-11
PLEKHO2	15q22.31	0.333614	5.78711e-11
SCIN	7p21.3	0.333506	5.87475e-11
SLC11A1	2q35	0.333469	5.90465e-11
DHX34	19q13.32	0.333457	5.91514e-11
TARS	5p13.3	0.333274	6.0674e-11
FIBP	11q13.1	0.333084	6.23027e-11
LHFPL3-AS2	7q22.2-q22.3	0.333035	6.27324e-11
LOC154761	7q35	0.332998	6.30553e-11
CEP131	17q25.3	0.332988	6.31427e-11
NPL	1q25.3	0.332982	6.31943e-11
SERTAD3	19q13.2	0.332973	6.32697e-11
COX7A2	6q14.1	0.332967	6.33279e-11
NOC4L	12q24.33	0.332963	6.33603e-11
ZC2HC1A	8q21.13	0.332931	6.3648e-11
UTP4	16q22.1	0.33286	6.42776e-11
HCK	20q11.21	0.332711	6.56197e-11
TFAP2E	1p34.3	0.332623	6.64277e-11
FOXE3	1p33	0.33262	6.64554e-11
LST1	6p21.33	0.332574	6.68866e-11
B3GNT7	2q37.1|2q37.1	0.332565	6.69685e-11
POF1B	Xq21.1	0.332549	6.71154e-11
MAFG	17q25.3	0.332476	6.78004e-11
LSP1	11p15.5	0.332417	6.8363e-11
APRT	16q24.3	0.332303	6.94521e-11
SLC35F6	2p23.3	0.332115	7.12904e-11
SAP30	4q34.1	0.33204	7.20324e-11
NME2P1	12q24.23	0.332039	7.2041e-11
BEST3	12q15	0.332028	7.21556e-11
FSCN1	7p22.1	0.332025	7.21795e-11
CACYBP	1q25.1	0.331936	7.30769e-11
SLC22A15	1p13.1	0.331912	7.33237e-11
GGN	19q13.2	0.331868	7.37753e-11
PIFO	1p13.2	0.33186	7.38575e-11
TNFRSF10C	8p21.3	0.331826	7.42038e-11
C11ORF80	11q13.2	0.331826	7.42063e-11
C16ORF74	16q24.1	0.331824	7.42181e-11
FAM225A	9q32	0.331766	7.48249e-11
PRPF31	19q13.42	0.331668	7.58448e-11
RELL1	4p14	0.331611	7.64439e-11
MIEN1	17q12	0.331542	7.71755e-11
PIP4K2A	10p12.2	0.331371	7.90223e-11
DUOX2	15q21.1	0.331324	7.95393e-11
CD80	3q13.33	0.331235	8.05338e-11
SLC7A8	14q11.2	0.331125	8.17627e-11
PSMB4	1q21.3	0.331076	8.23151e-11
GAGE12J	Xp11.23	0.331067	8.24187e-11
ISY1	3q21.3	0.331064	8.24545e-11
VGF	7q22.1	0.331053	8.25764e-11
PHLDB1	11q23.3	0.331043	8.27004e-11
MAPK13	6p21.31	0.330946	8.38082e-11
AKT1S1	19q13.33	0.330781	8.57386e-11
GPC4	Xq26.2	0.330761	8.59748e-11
GALNT5	2q24.1	0.330718	8.64976e-11
GOLGA2P7	15q25.2	0.330705	8.66532e-11
WARS	14q32.2	0.330698	8.6735e-11
ZDHHC13	11p15.1	0.330687	8.68584e-11
CDC42	1p36.12	0.330641	8.74206e-11
CYBC1	17q25.3	0.330482	8.93578e-11
TLCD5	11q23.3	0.330474	8.94481e-11
NHLRC4	16p13.3	0.330472	8.94758e-11
LIMK2	22q12.2	0.330319	9.13922e-11
EPHX4	1p22.1	0.33029	9.17529e-11
SMTNL2	17p13.2	0.330268	9.20263e-11
LINC00626	1q24.2	0.330266	9.20619e-11
ZBTB17	1p36.13	0.330214	9.27213e-11
NCAPG	4p15.31	0.330099	9.41994e-11
PLK3	1p34.1	0.330096	9.42388e-11
FZD7	2q33.1	0.330089	9.43328e-11
ANO4	12q23.1	0.330086	9.43679e-11
PPP5C	19q13.32	0.329992	9.55969e-11
CAPN9	1q42.2	0.32998	9.57529e-11
CD300LB	17q25.1	0.329969	9.58959e-11
LIMCH1	4p13	0.329942	9.62564e-11
POLR2L	11p15.5	0.329701	9.95102e-11
DRC1	2p23.3	0.329697	9.95577e-11
PAM16	16p13.3	0.329685	9.97214e-11
MRTO4	1p36.13	0.329495	1.02367e-10
CLIC6	21q22.12	0.329341	1.0455e-10
SPSB2	12p13.31	0.329334	1.04647e-10
ZNF296	19q13.32	0.329276	1.05494e-10
TMED3	15q25.1	0.329254	1.05803e-10
FAM72B	1p11.2	0.329129	1.07632e-10
TSPAN3	15q24.3	0.329121	1.07759e-10
HES2	1p36.31	0.329026	1.0917e-10
C10ORF91	10q26.3	0.329013	1.0937e-10
SIPA1	11q13.1	0.328969	1.10026e-10
FAM169B	15q26.3	0.328964	1.10106e-10
ETV4	17q21.31	0.32895	1.10319e-10
NDUFB2-AS1	7q34	0.328918	1.10799e-10
RAP1B	12q15	0.328917	1.10819e-10
RAB33A	Xq26.1	0.328914	1.10859e-10
LOC153910	6q24.2	0.328848	1.11873e-10
CKAP4	12q23.3	0.328802	1.12581e-10
ERI3	1p34.1	0.328694	1.14263e-10
PIP	7q34	0.328667	1.14681e-10
LYL1	19p13.13	0.328624	1.15364e-10
POLE4	2p12	0.328577	1.16098e-10
IL15	4q31.21	0.328558	1.16406e-10
ALPP	2q37.1	0.328406	1.18855e-10
LILRB3	19q13.42	0.328383	1.19223e-10
P3H4	17q21.2	0.328382	1.19253e-10
PHB	17q21.33	0.328335	1.20014e-10
EPS15L1	19p13.11	0.328331	1.20075e-10
CCDC22	Xp11.23	0.328314	1.20365e-10
ASNS	7q21.3	0.328245	1.21507e-10
LOC341056	11q24.1	0.32813	1.23422e-10
LHFPL5	6p21.31	0.328102	1.23902e-10
FXYD2	11q23.3	0.328076	1.24351e-10
KISS1R	19p13.3	0.328014	1.254e-10
DYNC1H1	14q32.31	0.327991	1.25794e-10
TFAP2C	20q13.31	0.327761	1.29812e-10
MCEMP1	19p13.2	0.327729	1.30386e-10
B3GNT4	12q24.31	0.32772	1.30533e-10
CLEC2L	7q34	0.327682	1.31211e-10
PKIA	8q21.13	0.32766	1.31615e-10
EGFL6	Xp22.2	0.327577	1.33118e-10
PRKD2	19q13.32	0.327465	1.35171e-10
C11ORF45	11q24.3	0.327413	1.36126e-10
TFF1	21q22.3	0.327329	1.37701e-10
SPINT1	15q15.1	0.327317	1.37915e-10
DBNL	7p13	0.327247	1.39244e-10
ATP6V0D1	16q22.1	0.327185	1.40427e-10
RAB20	13q34	0.327161	1.40878e-10
PSCA	8q24.3	0.327078	1.42481e-10
CKS1B	1q21.3	0.32702	1.43619e-10
GFER	16p13.3	0.326998	1.44051e-10
GNB3	12p13.31	0.326987	1.44266e-10
ITPR3	6p21.31	0.326888	1.46223e-10
VSIG1	Xq22.3	0.326796	1.48068e-10
ASAP1	8q24.21-q24.22	0.326783	1.48324e-10
AATF	17q12	0.326755	1.48892e-10
ATP5MC3	2q31.1	0.326442	1.55378e-10
RNASE1	14q11.2	0.326425	1.5572e-10
VCP	9p13.3	0.32639	1.56467e-10
TRIM54	2p23.3	0.326241	1.59663e-10
SLC4A3	2q35	0.32616	1.61431e-10
GAP43	3q13.31	0.326125	1.62202e-10
LRRC59	17q21.33	0.326114	1.62438e-10
ABCB9	12q24.31	0.325923	1.6671e-10
CRYM-AS1	16p12.2	0.325873	1.67856e-10
CYC1	8q24.3	0.32579	1.69742e-10
AMD1	6q21	0.325744	1.70799e-10
INSL3	19p13.11	0.325721	1.71346e-10
JPT2	16p13.3	0.325679	1.72318e-10
FOXF2	6p25.3	0.325679	1.72323e-10
MRPL9	1q21.3	0.325655	1.72891e-10
TRAF5	1q32.3	0.325504	1.76459e-10
CNFN	19q13.2	0.325496	1.76639e-10
MAPK12	22q13.33	0.325428	1.78282e-10
ARL11	13q14.2	0.325416	1.78566e-10
SSR2	1q22	0.325269	1.82151e-10
SLC4A2	7q36.1	0.325112	1.86066e-10
GNL2	1p34.3	0.325047	1.87705e-10
PUDP	Xp22.31	0.325007	1.88745e-10
DHX37	12q24.31	0.324959	1.89955e-10
SCAMP3	1q22	0.324875	1.92129e-10
CDCA5	11q13.1	0.32483	1.93314e-10
KCNK3	2p23.3	0.324619	1.98895e-10
SRSF12	6q15	0.324611	1.99111e-10
UQCC3	11q12.3	0.32448	2.02657e-10
BEST1	11q12.3	0.324434	2.03919e-10
GAGE4	Xp11.4-p11.2	0.324374	2.05589e-10
SLC52A1	17p13.2	0.324215	2.10019e-10
SNHG6	8q13.1|8q13	0.324134	2.12333e-10
CA11	19q13.33	0.324115	2.12873e-10
SPECC1	17p11.2	0.324066	2.14306e-10
TRIM6	11p15.4	0.323946	2.17772e-10
CBFB	16q22.1	0.323941	2.1793e-10
PNPLA1	6p21.31	0.323732	2.24139e-10
MAMSTR	19q13.33	0.323729	2.24246e-10
PLEKHM2	1p36.21	0.323414	2.33935e-10
NDOR1	9q34.3	0.323385	2.34869e-10
CNTNAP1	17q21.2	0.323366	2.35456e-10
MAN1B1	9q34.3	0.32332	2.36933e-10
SDC3	1p35.2	0.323315	2.37088e-10
CIB2	15q25.1	0.323285	2.38026e-10
DNAJC7	17q21.2	0.32325	2.39171e-10
UTF1	10q26.3	0.32308	2.44669e-10
COX7B	Xq21.1	0.323078	2.44747e-10
GPNMB	7p15.3	0.323059	2.45367e-10
PLAU	10q22.2	0.322942	2.4925e-10
C6ORF223	6p21.1	0.322911	2.50284e-10
CHRNA5	15q25.1	0.322634	2.59761e-10
CD151	11p15.5	0.322552	2.62654e-10
SQSTM1	5q35.3	0.322532	2.63335e-10
B3GNT8	19q13.2	0.322494	2.64685e-10
STMN1	1p36.11	0.322471	2.65494e-10
HCAR3	12q24.31	0.322367	2.69243e-10
LINC01011	6p25.2	0.322328	2.70651e-10
GNGT2	17q21.32	0.322262	2.73039e-10
MED8	1p34.2	0.322238	2.73926e-10
PAX8	2q14.1	0.322224	2.74415e-10
TIMMDC1	3q13.33	0.322223	2.74465e-10
SPA17	11q24.2	0.32211	2.78654e-10
LUC7L	16p13.3	0.321909	2.86258e-10
ATP6V0E1	5q35.1	0.321797	2.9055e-10
NOVA1	14q12	0.321787	2.90951e-10
GPX8	5q11.2	0.32175	2.924e-10
SP140L	2q37.1	0.321733	2.9307e-10
IFT52	20q13.12	0.321724	2.93406e-10
RALA	7p14.1	0.32171	2.93953e-10
KLK1	19q13.33	0.321698	2.94425e-10
NUP43	6q25.1	0.321637	2.96821e-10
AP1M2	19p13.2	0.321551	3.00248e-10
PTMA	2q37.1	0.321543	3.00579e-10
ATP5MG	11q23.3	0.321532	3.01031e-10
MDFI	6p21.1	0.321299	3.10525e-10
AMPD3	11p15.4	0.321206	3.14404e-10
GDF1	19p13.11	0.321098	3.1898e-10
EIF5A	17p13.1	0.320999	3.23212e-10
ASAH1	8p22	0.320818	3.31082e-10
TNFRSF11A	18q21.33	0.32079	3.32319e-10
IQCE	7p22.3	0.320783	3.3265e-10
INTS8	8q22.1	0.320767	3.33356e-10
CD1A	1q23.1	0.320609	3.40436e-10
YEATS2	3q27.1	0.320525	3.44256e-10
COX5A	15q24.2	0.32049	3.45863e-10
RUNX1	21q22.12	0.320445	3.47929e-10
DDX27	20q13.13	0.320381	3.50931e-10
CHST4	16q22.2	0.320305	3.54486e-10
GJC2	1q42.13	0.320204	3.59253e-10
EBI3	19p13.3	0.320113	3.63628e-10
PTPRO	12p12.3|12p13-p12	0.320025	3.67899e-10
CYSTM1	5q31.3	0.320012	3.68523e-10
ZBED2	3q13.13	0.319953	3.71439e-10
UMODL1	21q22.3	0.319894	3.74355e-10
ARNT2	15q25.1	0.319893	3.74428e-10
TLDC2	20q11.23	0.319842	3.76932e-10
LDHA	11p15.1	0.319806	3.78772e-10
SMAP1	6q13	0.319592	3.89644e-10
FAM177B	1q41	0.319557	3.91472e-10
SCGB2A1	11q12.3	0.319538	3.92456e-10
SYNC	1p35.1	0.319453	3.96883e-10
DYNC1LI1	3p22.3	0.319419	3.98695e-10
ENAH	1q42.12	0.319403	3.99536e-10
LSP1P4	2p11.2	0.31938	4.00741e-10
MARS	12q13.3	0.319334	4.03197e-10
AKAP8L	19p13.12	0.319115	4.15067e-10
LINC01587	4p16.2	0.319048	4.18737e-10
MPHOSPH6	16q23.3	0.319023	4.20143e-10
GAGE12D	Xp11.23	0.318959	4.237e-10
TRADD	16q22.1	0.318854	4.29625e-10
FLNC	7q32.1	0.318809	4.32203e-10
KLHDC8A	1q32.1	0.318688	4.39176e-10
PLCD3	17q21.31	0.318649	4.41448e-10
BLOC1S3	19q13.32	0.318622	4.43029e-10
PSRC1	1p13.3	0.318581	4.45427e-10
ISG20	15q26.1	0.318504	4.49941e-10
ABI3	17q21.32	0.31838	4.5737e-10
VEGFB	11q13.1	0.318263	4.64529e-10
NR1H2	19q13.33	0.318223	4.66935e-10
IQCA1	2q37.2-q37.3	0.318124	4.73096e-10
PYCR2	1q42.12	0.318108	4.74071e-10
LYPD1	2q21.2	0.3181	4.74586e-10
RNF19B	1p35.1	0.318091	4.75143e-10
KCNMB3	3q26.32	0.318065	4.76808e-10
FMNL2	2q23.3	0.318032	4.78867e-10
ALYREF	17q25.3	0.317969	4.82868e-10
SHC1	1q21.3	0.317966	4.83039e-10
PPAN	19p13.2	0.317927	4.85522e-10
PILRA	7q22.1	0.317917	4.86211e-10
IL21R	16p12.1	0.317799	4.93816e-10
SRC	20q11.23	0.317779	4.95115e-10
IQGAP3	1q22	0.317663	5.02734e-10
CD177	19q13.31	0.317578	5.08337e-10
WNK2	9q22.31	0.317541	5.10837e-10
TMEM11	17p11.2	0.317523	5.12047e-10
TXNDC9	2q11.2	0.317505	5.13285e-10
WNT10B	12q13.12	0.317398	5.20519e-10
BPIFA2	20q11.21	0.317348	5.23994e-10
MYL6	12q13.2	0.317261	5.30002e-10
CTLA4	2q33.2	0.317229	5.32228e-10
HSPA4	5q31.1	0.317208	5.33696e-10
STAB1	3p21.1	0.317199	5.34349e-10
GAGE1	Xp11.23	0.317054	5.44636e-10
GPD2	2q24.1	0.316928	5.5372e-10
TTYH3	7p22.3	0.316615	5.76893e-10
DUSP5	10q25.2	0.316576	5.79844e-10
NEU1	6p21.33	0.316571	5.80272e-10
RUSC1	1q22	0.316501	5.85582e-10
RHPN1	8q24.3	0.316416	5.92173e-10
POLR2H	3q27.1	0.316355	5.96861e-10
ATP5F1EP2	13q12.2	0.316335	5.98477e-10
GOLGA2P10	15q25.2	0.316328	5.99008e-10
CORO1A	16p11.2	0.316313	6.00219e-10
C5AR1	19q13.32	0.316303	6.0095e-10
HIST1H3D	6p22.2	0.316272	6.03395e-10
CARD11	7p22.2	0.315917	6.32121e-10
TMEM243	7q21.12	0.315805	6.41441e-10
BCL3	19q13.32	0.315736	6.47244e-10
TMPRSS7	3q13.2	0.315705	6.49871e-10
RNH1	11p15.5	0.315642	6.55198e-10
GALR2	17q25.1	0.315623	6.56873e-10
TNFSF13B	13q33.3	0.315516	6.66091e-10
TIGD5	8q24.3	0.315469	6.70236e-10
HLA-DQB2	6p21.32	0.315455	6.71441e-10
MANF	3p21.2	0.315324	6.83009e-10
SARS	1p13.3	0.315273	6.8756e-10
SNRPGP15	19p13.12	0.315272	6.87692e-10
CFD	19p13.3	0.315255	6.89228e-10
CORO1C	12q24.11	0.315125	7.00988e-10
TSPAN4	11p15.5	0.314986	7.13828e-10
BICD1	12p11.21	0.314954	7.16763e-10
CDR2L	17q25.1	0.314905	7.21311e-10
FOXD1	5q13.2	0.314873	7.24371e-10
GALNT12	9q22.33	0.314841	7.27397e-10
ODC1	2p25.1	0.314793	7.31942e-10
DNAJB6	7q36.3	0.314767	7.34395e-10
IFITM2	11p15.5	0.314765	7.34653e-10
RAB32	6q24.3	0.314734	7.37632e-10
KIF4A	Xq13.1	0.314717	7.39208e-10
COL1A1	17q21.33	0.314717	7.39265e-10
VLDLR	9p24.2	0.314677	7.43062e-10
VMO1	17p13.2	0.314638	7.46911e-10
ME1	6q14.2	0.314575	7.52992e-10
TMEM91	19q13.2	0.314474	7.62934e-10
LOC643387	2q37.3	0.314434	7.66986e-10
KCTD5	16p13.3	0.314425	7.67904e-10
DDX49	19p13.11	0.314314	7.79028e-10
MCOLN2	1p22.3	0.314291	7.81361e-10
SGSH	17q25.3	0.314251	7.85448e-10
EFNB1	Xq13.1	0.314221	7.88476e-10
CHCHD2	7p11.2	0.314114	7.99534e-10
NDUFAB1	16p12.2	0.314104	8.00602e-10
EFHD2	1p36.21	0.314044	8.06846e-10
OPA3	19q13.32	0.314007	8.10688e-10
SLC43A2	17p13.3	0.313912	8.2072e-10
YARS2	12p11.21	0.313892	8.22886e-10
KCND2	7q31.31	0.31388	8.24143e-10
GAS7	17p13.1	0.31388	8.24194e-10
KRT18	12q13.13	0.313768	8.36215e-10
CFAP300	11q22.1	0.31372	8.41495e-10
FSTL4	5q31.1	0.31371	8.42517e-10
ITGAX	16p11.2	0.313669	8.47035e-10
PDCD2	6q27	0.313659	8.48165e-10
CENPP	9q22.31	0.313617	8.52818e-10
NAP1L4	11p15.4	0.313604	8.5417e-10
PAQR5	15q23	0.313487	8.673e-10
NACC1	19p13.13	0.313341	8.83783e-10
RNF7	3q23	0.313246	8.94803e-10
SPIRE1	18p11.21	0.313241	8.9537e-10
NME4	16p13.3	0.313158	9.05067e-10
ADGRB1	8q24.3	0.313141	9.07001e-10
CDH15	16q24.3	0.312988	9.25177e-10
HSD17B1	17q21.2	0.31291	9.34477e-10
MCM10	10p13	0.312853	9.41393e-10
DMWD	19q13.32	0.312799	9.48058e-10
CLCNKA	1p36.13	0.312779	9.50448e-10
NCF1B	7q11.23	0.312744	9.54835e-10
NOP16	5q35.2	0.312727	9.56915e-10
CD44	11p13	0.312663	9.64889e-10
YWHAH	22q12.3	0.312634	9.68452e-10
RBM19	12q24.13-q24.21	0.312603	9.72378e-10
MMP14	14q11.2	0.312599	9.72839e-10
NTM	11q25	0.312477	9.88273e-10
CCR10	17q21.2	0.312466	9.89652e-10
BAG3	10q26.11	0.312452	9.91493e-10
LEFTY1	1q42.12	0.312438	9.93225e-10
OTUB1	11q13.1	0.312418	9.95856e-10
CDC45	22q11.21	0.312386	9.99954e-10
EIF4EBP1	8p11.23	0.31228	1.01372e-09
PES1	22q12.2	0.312221	1.02153e-09
ULBP1	6q25.1	0.31218	1.02696e-09
WIPF3	7p14.3	0.312169	1.02842e-09
CAVIN3	11p15.4	0.312103	1.03712e-09
MXRA8	1p36.33	0.312091	1.03876e-09
ZP3	7q11.23	0.312049	1.04438e-09
FANCI	15q26.1	0.312028	1.04721e-09
CORO6	17q11.2	0.312024	1.04779e-09
MAP1A	15q15.3	0.312009	1.04976e-09
SYTL3	6q25.3	0.311958	1.05676e-09
RIPOR1	16q22.1	0.311955	1.05717e-09
UCP2	11q13.4	0.311869	1.06883e-09
MRPL52	14q11.2	0.311818	1.076e-09
ACO2	22q13.2	0.311809	1.07719e-09
MFSD12	19p13.3	0.311761	1.08386e-09
LOC606724	16p11.2	0.31176	1.08396e-09
EMG1	12p13.31	0.311754	1.08478e-09
CTSV	9q22.33	0.311721	1.08947e-09
MRC2	17q23.2	0.311685	1.09453e-09
TIPIN	15q22.31	0.311673	1.09619e-09
ZNF593	1p36.11	0.311616	1.1043e-09
NFAM1	22q13.2	0.311606	1.10577e-09
PRKCD	3p21.1	0.311576	1.11005e-09
SF3A3	1p34.3	0.3114	1.13539e-09
KIFC3	16q21	0.311266	1.1551e-09
HIGD2A	5q35.2	0.311252	1.15721e-09
TMEM92	17q21.33	0.311235	1.15978e-09
CS	12q13.3	0.311008	1.19407e-09
MIDN	19p13.3	0.31092	1.20756e-09
RRAGD	6q15	0.31089	1.21231e-09
SPC25	2q24.3	0.310799	1.22656e-09
SLC7A5	16q24.2	0.310758	1.23296e-09
TLL2	10q24.1	0.31072	1.23901e-09
LETM1	4p16.3	0.310712	1.24026e-09
TMEM86A	11p15.1	0.310577	1.26185e-09
PTPRE	10q26.2	0.310568	1.26332e-09
ITGAV	2q32.1	0.310567	1.26351e-09
NR0B1	Xp21.2	0.310566	1.26374e-09
MVB12A	19p13.11	0.310513	1.27227e-09
FAM81B	5q15	0.310503	1.27395e-09
MED7	5q33.3	0.310501	1.27424e-09
ITGB8	7p21.1	0.310477	1.27822e-09
HSPE1	2q33.1	0.310406	1.28994e-09
CNOT3	19q13.42	0.310384	1.29359e-09
CSF3R	1p34.3	0.310348	1.29952e-09
TMEM120B	12q24.31	0.310325	1.3034e-09
SNHG3	1p35.3	0.310241	1.31736e-09
SNRPG	2p13.3	0.310236	1.31827e-09
AURKA	20q13.2	0.310217	1.32147e-09
CDCA2	8p21.2	0.310114	1.33904e-09
NPAS1	19q13.32	0.310106	1.34035e-09
TSR3	16p13.3	0.310091	1.34294e-09
SYT5	19q13.42|11p	0.310056	1.34899e-09
HVCN1	12q24.11	0.310022	1.35481e-09
SH3BP1	22q13.1	0.309938	1.36948e-09
CDCA8	1p34.3	0.309892	1.37751e-09
CALU	7q32.1	0.309835	1.38772e-09
SVBP	1p34.2	0.309738	1.40504e-09
ATP5MC2	12q13.13	0.30968	1.41543e-09
NCF1C	7q11.23	0.309626	1.42522e-09
CLECL1	12p13.31	0.309584	1.43283e-09
TRAFD1	12q24.13	0.309364	1.47365e-09
FAM219A	9p13.3	0.309329	1.48031e-09
DOK2	8p21.3	0.309195	1.50579e-09
MITF	3p13	0.309142	1.51592e-09
GIPR	19q13.32	0.309011	1.5416e-09
KCNK6	19q13.2	0.308848	1.57388e-09
ATP1A3	19q13.2	0.308726	1.59853e-09
IL18BP	11q13.4	0.308692	1.60553e-09
TMEM141	9q34.3	0.308571	1.63042e-09
TCN1	11q12.1	0.308543	1.6361e-09
F3	1p21.3	0.308506	1.64388e-09
BCL11A	2p16.1	0.308456	1.65442e-09
KRT79	12q13.13	0.308444	1.65682e-09
ALPI	2q37.1	0.308386	1.66913e-09
SLC44A4	6p21.33	0.308322	1.68284e-09
GPR137B	1q42.3	0.308309	1.68558e-09
USH1C	11p15.1	0.308305	1.68635e-09
NTS	12q21.31	0.308285	1.69075e-09
DFFA	1p36.22	0.308272	1.69341e-09
THAP3	1p36.31	0.308136	1.72296e-09
ANO10	3p22.1-p21.33	0.308112	1.72836e-09
YBX3P1	16p11.2	0.30809	1.73311e-09
EXOSC9	4q27	0.30806	1.73978e-09
GIPC1	19p13.12	0.308035	1.74536e-09
PDRG1	20q11.21	0.307993	1.75468e-09
FAM234A	16p13.3	0.307955	1.76302e-09
FAM72D	1q21.1	0.307873	1.78154e-09
COMMD9	11p13	0.307866	1.78318e-09
RUVBL2	19q13.33	0.307825	1.79239e-09
FOXJ1	17q25.1	0.307778	1.80315e-09
CALCR	7q21.3	0.307608	1.8423e-09
NABP1	2q32.3	0.307547	1.85665e-09
CCRL2	3p21.31	0.307368	1.89939e-09
LRRC23	12p13.31	0.307339	1.90635e-09
MRPL28	16p13.3	0.307286	1.91918e-09
SLC39A10	2q32.3	0.307146	1.95352e-09
FHOD1	16q22.1	0.307069	1.97249e-09
ENKD1	16q22.1	0.30705	1.97738e-09
SCPEP1	17q22	0.307021	1.98468e-09
RABAC1	19q13.2	0.306994	1.99133e-09
FGF11	17p13.1	0.306922	2.00965e-09
GLIS1	1p32.3	0.306904	2.01403e-09
C1ORF127	1p36.22	0.306736	2.05736e-09
BCAT2	19q13.33	0.306729	2.05918e-09
WNT4	1p36.12	0.306699	2.06708e-09
C3AR1	12p13.31	0.306564	2.10266e-09
FBN2	5q23.3	0.306538	2.10956e-09
POSTN	13q13.3	0.306458	2.1309e-09
TMEM229B	14q24.1	0.306457	2.13111e-09
POLD1	19q13.33	0.306419	2.14147e-09
SCRN1	7p14.3	0.306403	2.14577e-09
PDLIM4	5q31.1	0.306328	2.16602e-09
CANT1	17q25.3	0.306285	2.17788e-09
KNDC1	10q26.3	0.306256	2.18574e-09
KLHL29	2p24.1	0.30625	2.18751e-09
OBP2A	9q34.3	0.306247	2.1883e-09
CD248	11q13.2	0.306236	2.19143e-09
MYL4	17q21.32	0.306114	2.22538e-09
EVC2	4p16.2	0.306072	2.23706e-09
TCN2	22q12.2	0.306039	2.24654e-09
PARN	16p13.12	0.305972	2.26554e-09
GLIS2	16p13.3	0.305968	2.26658e-09
KCTD1	18q11.2	0.305934	2.27646e-09
PTPN7	1q32.1	0.305884	2.29075e-09
FKBP4	12p13.33	0.305874	2.29379e-09
TENT5B	1p36.11	0.305808	2.31295e-09
CATSPERZ	11q13.1	0.30578	2.32083e-09
TSTA3	8q24.3	0.305703	2.34344e-09
PRNP	20p13	0.305607	2.37205e-09
UBE2E2	3p24.3	0.3056	2.37409e-09
NPM1	5q35.1	0.305597	2.37519e-09
DDX54	12q24.13	0.305588	2.37786e-09
GABRD	1p36.33	0.305584	2.37892e-09
PBX4	19p13.11	0.305558	2.38683e-09
FAXC	6q16.2	0.305509	2.40158e-09
OSGIN2	8q21.3	0.305477	2.41121e-09
QPCT	2p22.2	0.305378	2.4413e-09
GINS3	16q21	0.305366	2.44491e-09
ZSWIM4	19p13.13-p13.12	0.305345	2.45142e-09
MIIP	1p36.22	0.305316	2.46053e-09
ABCG1	21q22.3	0.305306	2.46363e-09
GRIN1	9q34.3	0.305166	2.50724e-09
CYBB	Xp21.1-p11.4	0.305125	2.52017e-09
CCNB2	15q22.2	0.305097	2.52894e-09
SPINK4	9p13.3	0.305015	2.55537e-09
SLITRK4	Xq27.3	0.304969	2.57016e-09
EPHX3	19p13.12	0.304955	2.57469e-09
ATG3	3q13.2	0.304866	2.60351e-09
RPS2P32	7p15.3	0.304762	2.63775e-09
SNU13	22q13.2	0.304637	2.67947e-09
BBC3	19q13.32	0.30447	2.73602e-09
PDGFRL	8p22	0.304462	2.73887e-09
NOP10	15q14	0.304373	2.76952e-09
LITAF	16p13.13	0.304339	2.78134e-09
FDCSP	4q13.3|4q13	0.304272	2.8045e-09
TSEN54	17q25.1	0.304258	2.80969e-09
LINC00937	12p13.31	0.304229	2.81989e-09
GGA2	16p12.2	0.304103	2.86451e-09
MACC1	7p21.1	0.304054	2.88222e-09
TPGS2	18q12.2	0.303921	2.93067e-09
NDP	Xp11.3	0.30389	2.942e-09
FUT7	9q34.3	0.303875	2.94742e-09
ZNF860	3p23-p22.3	0.303833	2.96311e-09
PPP1R35	7q22.1	0.303806	2.97311e-09
PARVG	22q13.31	0.303731	3.00106e-09
MPP6	7p15.3	0.303726	3.00289e-09
FABP3	1p35.2	0.303725	3.00308e-09
SKA1	18q21.1	0.303675	3.02187e-09
SPRR3	1q21.3	0.303675	3.02192e-09
MDK	11p11.2	0.3036	3.05026e-09
RAB10	2p23.3	0.303593	3.05306e-09
S100A13	1q21.3	0.303555	3.06755e-09
NCBP2	3q29	0.303378	3.13633e-09
GGCT	7p14.3	0.30331	3.16287e-09
FABP5	8q21.13	0.303142	3.22978e-09
CCR3	3p21.31	0.303097	3.24778e-09
NFATC1	18q23	0.303083	3.25371e-09
PKN1	19p13.12	0.303082	3.25405e-09
ZFPL1	11q13.1	0.303033	3.27381e-09
ARHGDIB	12p12.3	0.303004	3.28571e-09
ABCB5	7p21.1	0.302997	3.28882e-09
PCNX2	1q42.2	0.302985	3.29344e-09
RNASE2	14q11.2	0.302973	3.29833e-09
UNC13A	19p13.11	0.30297	3.2997e-09
TTLL1	22q13.2	0.302915	3.32248e-09
SCN1B	19q13.11	0.30289	3.33262e-09
GAR1	4q25	0.30283	3.3578e-09
SOAT1	1q25.2	0.302775	3.3809e-09
VASH2	1q32.3	0.302723	3.40291e-09
FDX2	19p13.2	0.302626	3.44408e-09
FGF9	13q12.11	0.30262	3.44652e-09
DNAJC6	1p31.3	0.302598	3.45605e-09
UQCRB	8q22.1	0.30259	3.45974e-09
GRK6	5q35.3	0.302523	3.4885e-09
HCST	19q13.12	0.302481	3.50681e-09
SNRPF	12q23.1	0.302354	3.5624e-09
HTR3A	11q23.2	0.30233	3.57302e-09
TMPRSS13	11q23.3	0.302253	3.60747e-09
PAXX	9q34.3	0.302217	3.6238e-09
HLA-DPB1	6p21.32	0.3022	3.63119e-09
ATP1A1	1p13.1	0.302057	3.69665e-09
FAAP24	19q13.11	0.301973	3.73537e-09
ATP5MC1	17q21.32	0.301963	3.73991e-09
NKX2-8	14q13.3	0.301844	3.79539e-09
XRCC4	5q14.2	0.301836	3.79943e-09
LPAR5	12p13.31	0.301751	3.83953e-09
ILF2	1q21.3	0.301729	3.84992e-09
POU2F2	19q13.2	0.301726	3.85149e-09
GPBAR1	2q35	0.301685	3.87088e-09
CILP2	19p13.11	0.301414	4.00303e-09
RPS6KA1	1p36.11	0.301406	4.00727e-09
ODF2	9q34.11	0.301313	4.05355e-09
INAVA	1q32.1	0.301245	4.08792e-09
TSSC4	11p15.5	0.301213	4.10408e-09
CISD1	10q21.1	0.301189	4.11602e-09
IL17D	13q12.11	0.30108	4.17203e-09
MAGED4B	Xp11.22	0.301048	4.18851e-09
TMEM40	3p25.2	0.300924	4.25332e-09
KLHL35	11q13.4	0.300812	4.31273e-09
BHLHE41	12p12.1	0.300792	4.32306e-09
P2RX4	12q24.31	0.300714	4.36509e-09
APLP1	19q13.12	0.300684	4.38104e-09
HOXC6	12q13.13	0.300634	4.40846e-09
NOP58	2q33.1	0.3006	4.42713e-09
DIRAS2	9q22.2	0.30053	4.46522e-09
EIF5AL1	10q22.3	0.300524	4.46892e-09
ALDH3B2	11q13.2	0.300467	4.50031e-09
TLR7	Xp22.2	0.300443	4.51381e-09
TMEM54	1p35.1	0.300367	4.55598e-09
EXOSC5	19q13.2	0.300339	4.57196e-09
NKX3-2	4p15.33	0.300337	4.57309e-09
CALHM6	6q22.1	0.300322	4.58163e-09
R3HDM4	19p13.3	0.300292	4.59825e-09
MYBPC3	11p11.2	0.300235	4.63083e-09
LRP12	8q22.3	0.300216	4.64146e-09
NRG2	5q31.2	0.300144	4.68291e-09
ANKRD39	2q11.2	0.300132	4.68987e-09
SELENON	1p36.11	0.300102	4.70736e-09
SAGE1	Xq26.3	0.300073	4.72417e-09
ADAP1	7p22.3	0.300071	4.72565e-09
CCDC32	15q15.1	0.300054	4.73534e-09
ARHGDIA	17q25.3	0.300041	4.74305e-09
SV2A	1q21.2	0.300028	4.75063e-09
CARD16	11q22.3	0.299953	4.79466e-09
DLX4	17q21.33	0.299888	4.83317e-09
COG4	16q22.1	0.299864	4.84725e-09
ZBTB45	19q13.43	0.299855	4.85251e-09
LRFN4	11q13.2	0.299769	4.90468e-09
GPR132	14q32.33	0.299578	5.02106e-09
SLC6A15	12q21.31	0.299576	5.02207e-09
[truncated: 3 more rows]

## Sheet: FBP1 correlated molecules
Supplementary Table 4
Genes correlated to ALDOA and FBP1 expression of LIHC in the TCGA (PanCancer Atlas dataset).
Correlated Gene	Cytoband	Spearman's Correlation	p-Value
PTHLH	12p11.22	-0.299558	5.03364e-09
DOCK7	1p31.3	-0.299662	4.96964e-09
MAPK1	22q11.22	-0.299702	4.94486e-09
LIG3	17q12	-0.299775	4.90099e-09
PTPRG	3p14.2	-0.299897	4.82771e-09
SGO1	3p24.3	-0.299903	4.82399e-09
LHFPL3-AS2	7q22.2-q22.3	-0.300049	4.73799e-09
SNRPB	20p13	-0.300118	4.69822e-09
NELFE	6p21.33	-0.300199	4.65155e-09
MMP1	11q22.2	-0.300214	4.6427e-09
HSF2BP	21q22.3	-0.300234	4.63149e-09
ANKRD11	16q24.3	-0.300246	4.62482e-09
RNF2	1q25.3	-0.300252	4.62134e-09
DQX1	2p13.1	-0.300409	4.53249e-09
TATDN2	3p25.3	-0.300496	4.48391e-09
AGO2	8q24.3	-0.300854	4.29051e-09
SFR1	10q25.1	-0.300954	4.23748e-09
ZNF587	19q13.43	-0.300984	4.22164e-09
BCOR	Xp11.4	-0.301181	4.12027e-09
ASPM	1q31.3	-0.301185	4.11802e-09
DTNBP1	6p22.3	-0.301197	4.11204e-09
TAF1D	11q21	-0.301224	4.09861e-09
SNHG32	6p21.33	-0.301237	4.09167e-09
TNPO1	5q13.2	-0.301272	4.07404e-09
PIFO	1p13.2	-0.301293	4.06348e-09
SLC1A5	19q13.32	-0.301334	4.04288e-09
SRRM3	7q11.23	-0.301336	4.04176e-09
DHX15	4p15.2	-0.301413	4.00362e-09
LINC01011	6p25.2	-0.301565	3.92877e-09
DLL3	19q13.2	-0.301582	3.92048e-09
BMP4	14q22.2	-0.301614	3.90519e-09
NHLH2	1p13.1	-0.301617	3.90363e-09
YTHDF1	20q13.33	-0.301714	3.85732e-09
DDX11	12p11.21	-0.301843	3.79608e-09
CDCA3	12p13.31	-0.301948	3.74662e-09
WWC3	Xp22.2	-0.301956	3.74321e-09
PHF19	9q33.2	-0.30197	3.73673e-09
AKAP8	19p13.12	-0.30197	3.73655e-09
ZNF343	20p13	-0.30213	3.663e-09
SEC23B	20p11.23	-0.302154	3.65233e-09
MRGBP	20q13.33	-0.302181	3.63981e-09
ACBD3	1q42.12	-0.30219	3.63605e-09
KIF5A	12q13.3	-0.302195	3.63346e-09
NIF3L1	2q33.1	-0.302226	3.61984e-09
DBN1	5q35.3	-0.302254	3.60698e-09
HS3ST5	6q21-q22.1	-0.302361	3.55928e-09
TWNK	10q24.31	-0.302911	3.3242e-09
GNPDA1	5q31.3	-0.302932	3.3155e-09
MRTFA	22q13.1-q13.2	-0.302932	3.3154e-09
CA5B	Xp22.2	-0.302971	3.29917e-09
HAUS3	4p16.3	-0.303003	3.28642e-09
MTR	1q43	-0.303045	3.26923e-09
DDX52	17q12	-0.30313	3.23465e-09
PABPC3	13q12.13	-0.303135	3.23254e-09
ZSCAN2	15q25.2	-0.303162	3.22171e-09
E2F3	6p22.3	-0.303164	3.22102e-09
ZC3H11A	1q32.1	-0.303198	3.20749e-09
PRR19	19q13.2	-0.303288	3.17167e-09
E2F5	8q21.2	-0.30337	3.13921e-09
CENPM	22q13.2	-0.303447	3.10935e-09
AP3B1	5q14.1	-0.303493	3.09154e-09
FAM171A2	17q21.31	-0.303611	3.04627e-09
AAK1	2p13.3	-0.303692	3.01568e-09
ZNF273	7q11.21	-0.30376	2.98992e-09
UBE2Q1	1q21.3	-0.30382	2.96784e-09
HSPA14	10p13	-0.303824	2.96625e-09
FAM72A	1q32.1	-0.303952	2.91903e-09
TEDDM1	1q25.3	-0.303965	2.91429e-09
CRYBG2	1p36.11	-0.304027	2.89196e-09
GPC2	7q22.1	-0.304193	2.83243e-09
PACC1	1q32.3	-0.30424	2.8159e-09
RCN2	15q24.3	-0.304256	2.81037e-09
ZNF318	6p21.1	-0.304302	2.79407e-09
UIMC1	5q35.2	-0.304401	2.75969e-09
STAU2	8q21.11	-0.304455	2.74097e-09
DDX55	12q24.31	-0.304538	2.71288e-09
JRKL	11q21	-0.304642	2.6775e-09
SPEF1	20p13	-0.304643	2.67726e-09
ZMIZ2	7p13	-0.304713	2.65386e-09
MZT1	13q21.33	-0.304722	2.65077e-09
ZSCAN30	18q12.2	-0.304805	2.62336e-09
ZNHIT6	1p22.3	-0.304876	2.60015e-09
PIMREG	17p13.2	-0.30488	2.59874e-09
UBE2C	20q13.12	-0.304947	2.57726e-09
NUP160	11p11.2	-0.305058	2.54164e-09
INTS3	1q21.3	-0.305228	2.48784e-09
SLC6A14	Xq23	-0.305306	2.46362e-09
SLC41A3	3q21.2-q21.3	-0.305361	2.44664e-09
IGF2BP2	3q27.2	-0.305501	2.40395e-09
GPSM2	1p13.3	-0.305594	2.37599e-09
APCDD1	18p11.22	-0.305617	2.36913e-09
XRN2	20p11.22	-0.305653	2.35843e-09
RAD51AP1	12p13.32	-0.305669	2.35364e-09
RAB3GAP1	2q21.3	-0.305781	2.32066e-09
RALA	7p14.1	-0.305939	2.27506e-09
DMBX1	1p33	-0.305985	2.26182e-09
PVT1	8q24.21	-0.30599	2.2603e-09
ALDOA	16p11.2	-0.306125	2.22228e-09
CALHM3	10q24.33	-0.306168	2.21033e-09
S100PBP	1p35.1	-0.306255	2.18623e-09
RNF4	4p16.3	-0.306261	2.18448e-09
IQCE	7p22.3	-0.306283	2.17855e-09
TRIB2	2p24.3	-0.306301	2.17358e-09
BIRC5	17q25.3	-0.306355	2.1588e-09
QPCT	2p22.2	-0.30648	2.12493e-09
ATXN7L2	1p13.3	-0.306736	2.05727e-09
GDF1	19p13.11	-0.30681	2.03829e-09
KIN	10p14	-0.306925	2.00884e-09
CDC45	22q11.21	-0.307132	1.95679e-09
PRR14L	22q12.2	-0.307147	1.9531e-09
SASS6	1p21.2	-0.307182	1.94447e-09
TTC30B	2q31.2	-0.307466	1.87581e-09
MCRS1	12q13.12	-0.307506	1.86637e-09
CLSPN	1p34.3	-0.307613	1.84117e-09
SRRT	7q22.1	-0.307614	1.84105e-09
ELK4	1q32.1	-0.307635	1.8362e-09
FAM193A	4p16.3	-0.307728	1.81467e-09
MED17	11q21	-0.307787	1.80098e-09
CENPO	2p23.3	-0.30781	1.79588e-09
CCNA2	4q27	-0.30788	1.78002e-09
MYRF	11q12.2	-0.3079	1.77549e-09
SSR1	6p24.3	-0.30795	1.76411e-09
OR12D2	6p22.1	-0.308016	1.74949e-09
ASAP2	2p25.1|2p24	-0.308053	1.74129e-09
NCSTN	1q23.2	-0.308095	1.73212e-09
HECTD2	10q23.32	-0.308154	1.719e-09
FANCF	11p14.3	-0.308422	1.66147e-09
FANCE	6p21.31	-0.3085	1.64511e-09
POLR2B	4q12	-0.308554	1.63383e-09
RBM15B	3p21.2	-0.308736	1.5965e-09
KSR1	17q11.2	-0.308773	1.58891e-09
MTF2	1p22.1	-0.308855	1.57246e-09
SUPT7L	2p23.3	-0.308901	1.56336e-09
ZNF514	2q11.1	-0.308912	1.56115e-09
DYNC2LI1	2p21	-0.308945	1.55449e-09
CCDC6	10q21.2	-0.308949	1.55374e-09
HMGXB3	5q32	-0.309074	1.52918e-09
PFKFB4	3p21.31	-0.309096	1.52493e-09
CENPK	5q12.3	-0.309232	1.49875e-09
PAXIP1	7q36.2	-0.309263	1.49273e-09
POGZ	1q21.3	-0.309269	1.4917e-09
MKI67	10q26.2	-0.309307	1.48441e-09
SNHG3	1p35.3	-0.309371	1.47232e-09
GORASP2	2q31.1	-0.309437	1.46e-09
GRPEL2	5q32	-0.309498	1.44868e-09
TKT	3p21.1	-0.309526	1.44344e-09
SUPT16H	14q11.2	-0.309614	1.4274e-09
RBM34	1q42.3	-0.309664	1.41831e-09
OSBP2	22q12.2	-0.309688	1.41392e-09
DENND5A	11p15.4	-0.309842	1.38638e-09
ZNF703	8p11.23	-0.310104	1.34075e-09
PDE7A	8q13.1	-0.310186	1.32672e-09
ZNF71	19q13.43	-0.310203	1.32386e-09
RAB35	12q24.23	-0.310328	1.30283e-09
LASP1	17q12	-0.310373	1.29525e-09
PHF1	6p21.32	-0.310421	1.28736e-09
DIAPH3	13q21.2	-0.310477	1.27818e-09
TRIM17	1q42.13	-0.310483	1.27727e-09
FMN2	1q43	-0.310548	1.26666e-09
CCDC34	11p14.1	-0.310567	1.26346e-09
ABCA11P	4p16.3	-0.3106	1.25818e-09
ATP9A	20q13.2	-0.310678	1.24565e-09
EIF2D	1q32.1	-0.310751	1.23409e-09
HPDL	1p34.1	-0.310785	1.22875e-09
SOX11	2p25.2	-0.31088	1.21386e-09
NUP43	6q25.1	-0.310899	1.2109e-09
CDCA2	8p21.2	-0.310923	1.2071e-09
ZHX2	8q24.13	-0.310951	1.20275e-09
ZNF239	10q11.21	-0.311026	1.19126e-09
ARHGAP11A	15q13.3	-0.311065	1.18527e-09
DBNDD2	20q13.12	-0.311074	1.18404e-09
TMEM109	11q12.2	-0.31116	1.17097e-09
UBFD1	16p12.2	-0.311265	1.15528e-09
SPDL1	5q35.1	-0.311305	1.14937e-09
NOL11	17q24.2	-0.311393	1.13648e-09
EIF2S3	Xp22.11	-0.311514	1.11893e-09
FLJ42627	16p13.3	-0.31153	1.11657e-09
DDX1	2p24.3	-0.311588	1.1083e-09
TCF20	22q13.2|22q13.3	-0.311593	1.10757e-09
GAGE12D	Xp11.23	-0.311734	1.08768e-09
HNRNPA3	2q31.2	-0.311734	1.08765e-09
ZNF516	18q23	-0.311868	1.06907e-09
CASC15	6p22.3	-0.311935	1.05992e-09
TRIM71	3p22.3	-0.312005	1.05038e-09
BRCA1	17q21.31	-0.312127	1.03388e-09
WDR35	2p24.1	-0.312263	1.01596e-09
STK25	2q37.3	-0.31234	1.00591e-09
SAFB2	19p13.3	-0.31239	9.99415e-10
BMPR1A	10q23.2	-0.312508	9.84314e-10
CYP2W1	7p22.3	-0.312509	9.84216e-10
CDCA5	11q13.1	-0.312528	9.81859e-10
ATP6V1C1	8q22.3	-0.312535	9.8096e-10
USP14	18p11.32	-0.312536	9.80774e-10
CDK2	12q13.2	-0.312597	9.73085e-10
DLX6-AS1	7q21.3	-0.312599	9.72845e-10
KMT5C	19q13.42	-0.312715	9.58399e-10
SMG8	17q22	-0.312941	9.30817e-10
PIGS	17q11.2	-0.312958	9.28786e-10
SUMO2	17q25.1	-0.31296	9.28522e-10
TMC2	20p13	-0.313008	9.2274e-10
TOPBP1	3q22.1	-0.313091	9.12955e-10
NUTM2A-AS1	10q23.2	-0.313099	9.11973e-10
DDX46	5q31.1	-0.313184	9.02004e-10
MED24	17q21.1	-0.313196	9.00546e-10
NUP133	1q42.13	-0.313214	8.98508e-10
GYG1	3q24	-0.313325	8.85634e-10
THOC2	Xq25	-0.31348	8.6812e-10
SMNDC1	10q25.2	-0.313497	8.66112e-10
CBL	11q23.3	-0.3135	8.65782e-10
TMEM185B	2q14.2	-0.313601	8.54595e-10
ZNF124	1q44	-0.313636	8.50699e-10
PDCL	9q33.2	-0.313691	8.44592e-10
TSC1	9q34.13	-0.313735	8.39887e-10
MINK1	17p13.2	-0.313771	8.35897e-10
ENC1	5q13.3	-0.313776	8.3534e-10
ENOPH1	4q21.22	-0.3138	8.32798e-10
FAM72B	1p11.2	-0.313908	8.21163e-10
FBRS	16p11.2	-0.313943	8.17441e-10
FAM53B	10q26.13	-0.313948	8.16948e-10
BRD7	16q12.1	-0.314094	8.01618e-10
SCRIB	8q24.3	-0.314123	7.98568e-10
PRKDC	8q11.21	-0.314141	7.96742e-10
PPM1G	2p23.3	-0.314341	7.76257e-10
SKA1	18q21.1	-0.31439	7.71406e-10
INGX	Xq13.1	-0.314438	7.66512e-10
ANKLE2	12q24.33	-0.314441	7.66244e-10
RUFY2	10q21.3	-0.31446	7.64417e-10
GMIP	19p13.11	-0.31455	7.55427e-10
UNC119B	12q24.31	-0.314679	7.42901e-10
PKNOX1	21q22.3	-0.314776	7.33577e-10
SRCAP	16p11.2	-0.314789	7.32314e-10
WASHC5	8q24.13	-0.314914	7.20552e-10
STK36	2q35	-0.315012	7.11328e-10
SIX2	2p21	-0.315117	7.01703e-10
BRIX1	5p13.2	-0.315208	6.93379e-10
CEMIP2	9q21.13	-0.315259	6.88856e-10
SNRPN	15q11.2	-0.315281	6.86858e-10
ZBTB41	1q31.3	-0.31534	6.81614e-10
ANKRD40	17q21.33	-0.315419	6.74618e-10
CCT3	1q22	-0.315515	6.66179e-10
IPO9	1q32.1	-0.315521	6.65667e-10
ABRAXAS1	4q21.23	-0.315696	6.50668e-10
MGC57346	17q21.31	-0.315707	6.49691e-10
CYREN	7q33	-0.315734	6.47451e-10
SUZ12P1	17q11.2	-0.315785	6.43074e-10
EIF3E	8q23.1	-0.315818	6.40325e-10
RAN	12q24.33	-0.315903	6.33235e-10
NUP188	9q34.11	-0.316105	6.16749e-10
SLC35B2	6p21.1	-0.316143	6.13683e-10
TMEM52B	12p13.2	-0.316429	5.91174e-10
DKKL1	19q13.33	-0.316557	5.81316e-10
PHF12	17q11.2	-0.316571	5.80253e-10
DNMT3B	20q11.21	-0.316632	5.75599e-10
GATAD2B	1q21.3	-0.31675	5.66781e-10
MFSD2B	2p23.3	-0.316826	5.61132e-10
PEA15	1q23.2	-0.316998	5.48638e-10
DUSP12	1q23.3	-0.317081	5.4271e-10
PTGES2-AS1	9q34.11	-0.317088	5.42174e-10
DCTN1	2p13.1	-0.317139	5.38592e-10
SLC7A5P2	16p12.2	-0.317194	5.34721e-10
ANKS3	16p13.3	-0.317324	5.25622e-10
PCLAF	15q22.31	-0.317356	5.23428e-10
NUDCD1	8q23.1	-0.317449	5.17049e-10
C18ORF54	18q21.2	-0.31746	5.16333e-10
GON4L	1q22	-0.31747	5.1567e-10
ZNF432	19q13.41	-0.317495	5.13936e-10
ASNS	7q21.3	-0.317507	5.1317e-10
MPV17	2p23.3	-0.317559	5.09613e-10
CWC22	2q31.3	-0.317567	5.09079e-10
KMT5A	12q24.31	-0.3176	5.06929e-10
TES	7q31.2	-0.317818	4.92585e-10
IPO4	14q12	-0.317853	4.90304e-10
POLQ	3q13.33	-0.31792	4.85992e-10
SH2B2	7q22.1	-0.318016	4.79903e-10
ATAD5	17q11.2	-0.318033	4.7882e-10
CTBP1-DT	4p16.3	-0.318102	4.74484e-10
CHAF1B	21q22.12-q22.13	-0.318113	4.73796e-10
LOC100134368	16p13.3	-0.318138	4.72247e-10
GCNT3	15q22.2	-0.318244	4.65667e-10
DENR	12q24.31	-0.318245	4.65595e-10
ATP7A	Xq21.1	-0.318321	4.60944e-10
VPS35	16q11.2	-0.318365	4.58293e-10
EP400	12q24.33	-0.318378	4.57487e-10
TDG	12q23.3	-0.318421	4.5491e-10
CDK6	7q21.2	-0.318437	4.53941e-10
NPC1	18q11.2	-0.318472	4.51878e-10
ZNF7	8q24.3	-0.318588	4.44995e-10
LRRC1	6p12.1	-0.318615	4.43401e-10
C1ORF216	1p34.3	-0.318733	4.36572e-10
SCRN1	7p14.3	-0.318964	4.23414e-10
METAP1	4q23	-0.31908	4.16993e-10
ARHGAP26	5q31.3	-0.319114	4.15093e-10
PRPF40A	2q23.3	-0.31912	4.14798e-10
XYLT2	17q21.33	-0.319146	4.13369e-10
TEAD3	6p21.31	-0.319158	4.12708e-10
ZBED8	5q33.3	-0.319225	4.09048e-10
SETD1A	16p11.2	-0.319243	4.08094e-10
DNAJC14	12q13.2	-0.319338	4.02996e-10
NUP155	5p13.2	-0.319402	3.99587e-10
DCP1A	3p21.1	-0.319424	3.9841e-10
RAD51	15q15.1	-0.319456	3.96735e-10
FBXO46	19q13.32	-0.319514	3.93697e-10
MED25	19q13.33	-0.319543	3.92193e-10
GMEB1	1p35.3	-0.319699	3.84146e-10
WDR62	19q13.12	-0.319724	3.82889e-10
NUP205	7q33	-0.319752	3.81461e-10
AGAP1	2q37.2	-0.319828	3.77642e-10
SUPT5H	19q13.2	-0.319878	3.75149e-10
PTPN12	7q11.23	-0.319917	3.73192e-10
NUP210	3p25.1	-0.319927	3.72743e-10
LUC7L3	17q21.33	-0.319984	3.69928e-10
RCOR2	11q13.1	-0.32008	3.65225e-10
C4ORF48	4p16.3	-0.320328	3.53374e-10
PPAT	4q12	-0.320369	3.51479e-10
CTTN	11q13.3	-0.320519	3.44514e-10
CENPH	5q13.2	-0.320564	3.42484e-10
SKA3	13q12.11	-0.320754	3.3392e-10
CSTF2	Xq22.1	-0.320946	3.25507e-10
PGS1	17q25.3	-0.321053	3.20891e-10
VPS26A	10q22.1	-0.321092	3.1921e-10
IGF2BP1	17q21.32	-0.321162	3.16274e-10
PRAME	22q11.22	-0.321171	3.15886e-10
HOXC13	12q13.13	-0.321351	3.08379e-10
SYNRG	17q12	-0.321425	3.0535e-10
RBMS1	2q24.2	-0.321511	3.01878e-10
JPT2	16p13.3	-0.321542	3.00632e-10
TMEM237	2q33.1	-0.321659	2.95949e-10
STK3	8q22.2	-0.321674	2.95373e-10
DLEU7	13q14.3	-0.321738	2.92849e-10
ACACA	17q12	-0.321759	2.92037e-10
CSNK1E	22q13.1	-0.321763	2.91865e-10
RPIA	2p11.2	-0.32189	2.8695e-10
FAM163A	1q25.2	-0.32191	2.86207e-10
NAE1	16q22.1	-0.321979	2.83564e-10
TMEM65	8q24.13	-0.321998	2.82849e-10
KBTBD2	7p14.3	-0.322099	2.7907e-10
SERPINI1	3q26.1	-0.322124	2.7812e-10
GTF3C3	2q33.1	-0.322262	2.73021e-10
KIF20B	10q23.31	-0.322328	2.70643e-10
GAL3ST1	22q12.2	-0.322336	2.70355e-10
ZBED4	22q13.33	-0.322387	2.68505e-10
PRDM4	12q23.3	-0.322561	2.62335e-10
UXS1	2q12.2	-0.322684	2.58042e-10
SMC3	10q25.2	-0.322835	2.52869e-10
C10ORF88	10q26.13	-0.322882	2.51255e-10
SMARCB1	22q11.23|22q11	-0.323009	2.47017e-10
MCM3AP-AS1	21q22.3	-0.323106	2.43835e-10
SOCS5	2p21	-0.323109	2.43743e-10
ASB1	2q37.3	-0.32311	2.43695e-10
KPNA2	17q24.2	-0.323197	2.40868e-10
DDX23	12q13.12	-0.323273	2.38418e-10
ARID3A	19p13.3	-0.323365	2.35487e-10
C5ORF34	5p12	-0.323401	2.34362e-10
TMEM69	1p34.1	-0.323558	2.29445e-10
ZNF384	12p13.31	-0.323562	2.29346e-10
DTL	1q32.3	-0.323679	2.2575e-10
RNF220	1p34.1	-0.323751	2.23582e-10
SUPT20H	13q13.3	-0.323773	2.22905e-10
ZNF461	19q13.12	-0.323811	2.21792e-10
GAS5	1q25.1	-0.323854	2.20495e-10
CENPL	1q25.1	-0.323855	2.20458e-10
DYNC1I2	2q31.1	-0.323888	2.19497e-10
MTCH1	6p21.2	-0.323972	2.17022e-10
KIAA1549	7q34	-0.324131	2.12431e-10
SMCR8	17p11.2	-0.324204	2.10353e-10
CACYBP	1q25.1	-0.324314	2.07238e-10
ARID2	12q12	-0.324382	2.05345e-10
RRP12	10q24.1	-0.324736	1.95785e-10
TROAP	12q13.12	-0.324933	1.90641e-10
TMEM44	3q29	-0.324938	1.90502e-10
PTBP3	9q32	-0.324993	1.89083e-10
ATF1	12q13.12	-0.325013	1.88583e-10
PPP4R1	18p11.22	-0.325053	1.87571e-10
VIRMA	8q22.1	-0.325204	1.83776e-10
CYP26B1	2p13.2	-0.325368	1.79732e-10
NRP1	10p11.22	-0.32539	1.79191e-10
SMYD2	1q32.3	-0.325525	1.75951e-10
DLX6	7q21.3	-0.325587	1.74472e-10
ANKS1A	6p21.31	-0.325688	1.72104e-10
C4ORF47	4q35.1	-0.32569	1.72075e-10
WDSUB1	2q24.2	-0.325707	1.7168e-10
CCDC40	17q25.3	-0.325824	1.68966e-10
SGSH	17q25.3	-0.325856	1.68245e-10
ZBTB34	9q33.3	-0.325867	1.67993e-10
IPO7	11p15.4	-0.326056	1.6373e-10
MYLIP	6p22.3	-0.326204	1.60484e-10
TMEM51-AS1	1p36.21	-0.326226	1.59987e-10
SH3D21	1p34.3	-0.32647	1.54785e-10
TEX19	17q25.3	-0.326591	1.52248e-10
NT5DC2	3p21.1	-0.326598	1.52099e-10
R3HDM1	2q21.3	-0.326615	1.51765e-10
FANCI	15q26.1	-0.326774	1.48506e-10
XXYLT1	3q29	-0.326803	1.47928e-10
C6ORF223	6p21.1	-0.32685	1.46984e-10
THUMPD3-AS1	3p25.3	-0.326853	1.46911e-10
STX1A	7q11.23	-0.326867	1.46647e-10
NEK11	3q22.1	-0.326903	1.45931e-10
MGME1	20p11.23	-0.327041	1.43199e-10
FER1L4	20q11.22	-0.327057	1.42898e-10
POP1	8q22.2	-0.327109	1.41882e-10
DLX2	2q31.1	-0.327166	1.40789e-10
SLC7A1	13q12.3	-0.327178	1.40563e-10
PRR11	17q22	-0.327229	1.39579e-10
SNORD116-20	15q11.2	-0.327307	1.38114e-10
SNRNP200	2q11.2	-0.327408	1.36213e-10
RBM19	12q24.13-q24.21	-0.327601	1.32671e-10
ENO2	12p13.31	-0.32762	1.3233e-10
CTSV	9q22.33	-0.327731	1.3035e-10
C19ORF48	19q13.33	-0.32774	1.30185e-10
WDR37	10p15.3	-0.327931	1.26838e-10
NAA25	12q24.13	-0.328068	1.24484e-10
ARHGAP1	11p11.2	-0.328179	1.22606e-10
ZNF526	19q13.2	-0.328216	1.21988e-10
FAM219B	15q24.1-q24.2	-0.328292	1.20728e-10
POLG2	17q23.3	-0.328365	1.19531e-10
ISG20L2	1q23.1	-0.328462	1.17953e-10
CHTF18	16p13.3	-0.328479	1.17669e-10
LIX1	5q15	-0.328525	1.16928e-10
RAI1	17p11.2	-0.328548	1.16558e-10
NSD1	5q35.3	-0.328633	1.15213e-10
MTMR2	11q21	-0.328667	1.14674e-10
KTN1-AS1	14q22.3	-0.328753	1.13343e-10
ASH1L-AS1	1q22	-0.328867	1.11573e-10
DRP2	Xq22.1	-0.32896	1.10165e-10
TLCD3A	17p13.3	-0.328985	1.09784e-10
ZNF710	15q26.1	-0.329051	1.08792e-10
METTL3	14q11.2	-0.329091	1.08199e-10
PIP4P2	8q21.3	-0.329144	1.07412e-10
SOX9	17q24.3	-0.329155	1.07249e-10
SHC1	1q21.3	-0.329227	1.06199e-10
HHIPL2	1q41	-0.329228	1.06182e-10
DAGLA	11q12.2	-0.329445	1.03068e-10
USP46	4q12	-0.329449	1.03016e-10
PKMYT1	16p13.3	-0.329751	9.88157e-11
PRMT3	11p15.1	-0.329768	9.85944e-11
FOXM1	12p13.33	-0.32978	9.84239e-11
CEP95	17q23.3	-0.329917	9.65913e-11
ZNF581	19q13.42	-0.329964	9.59619e-11
XRCC6	22q13.2	-0.330053	9.48015e-11
DBIL5P	17p13.3	-0.33011	9.40542e-11
ZNF775	7q36.1	-0.330138	9.36971e-11
BORA	13q21.33	-0.330169	9.3289e-11
HNRNPDL	4q21.22	-0.330221	9.26307e-11
SVBP	1p34.2	-0.330343	9.10872e-11
RGL2	6p21.32	-0.330472	8.94813e-11
ETV5	3q27.2	-0.33057	8.82722e-11
MAPKAPK5	12q24.12-q24.13	-0.330639	8.74384e-11
PTK2	8q24.3	-0.330657	8.72289e-11
ZNF286A	17p12	-0.330686	8.68699e-11
SSRP1	11q12.1	-0.330769	8.58891e-11
SOGA1	20q11.23	-0.330787	8.56748e-11
MMD	17q22	-0.330822	8.52531e-11
MOB3A	19p13.3	-0.330914	8.41848e-11
CERS5	12q13.12	-0.33111	8.19287e-11
SH3GL3	15q25.2	-0.331258	8.02775e-11
HNRNPA1P33	10q11.22	-0.331266	8.01787e-11
CHTOP	1q21.3	-0.331337	7.93952e-11
RYK	3q22.2	-0.331389	7.88271e-11
SPP1	4q22.1	-0.331391	7.88138e-11
DSCC1	8q24.12	-0.331565	7.69374e-11
CEP131	17q25.3	-0.33167	7.58218e-11
SLC2A1	1p34.2	-0.33173	7.51996e-11
KNTC1	12q24.31	-0.331767	7.48155e-11
COG1	17q25.1	-0.331914	7.33054e-11
SNHG1	11q12.3	-0.331954	7.28936e-11
ZNF740	12q13.13	-0.332039	7.20449e-11
CRAMP1	16p13.3	-0.332165	7.07886e-11
CSNK2A3	11p15.4	-0.332187	7.05821e-11
KDM5C	Xp11.22	-0.332384	6.86728e-11
POLDIP3	22q13.2	-0.33239	6.86177e-11
HNRNPA1	12q13.13	-0.332397	6.85515e-11
USP3	15q22.31	-0.332462	6.79366e-11
ARHGEF2	1q22	-0.332526	6.73294e-11
ZNF84	12q24.33	-0.332648	6.62026e-11
TRAIP	3p21.31	-0.33265	6.61781e-11
ZNF765	19q13.42	-0.332754	6.52275e-11
SPC25	2q24.3	-0.332766	6.51257e-11
XPO6	16p12.1	-0.332827	6.45693e-11
RAPGEFL1	17q21.1	-0.332831	6.45364e-11
CBFA2T2	20q11.21-q11.22	-0.332866	6.42216e-11
HNRNPA0	5q31.2	-0.33287	6.41842e-11
BLOC1S3	19q13.32	-0.332877	6.41267e-11
CHD7	8q12.2	-0.332911	6.38217e-11
SACS	13q12.12	-0.332917	6.37695e-11
CKAP4	12q23.3	-0.332943	6.35397e-11
NFRKB	11q24.3	-0.33307	6.2426e-11
TPX2	20q11.21	-0.333095	6.22115e-11
PPHLN1	12q12	-0.333135	6.18626e-11
RIC8A	11p15.5	-0.333136	6.185e-11
TRAF5	1q32.3	-0.333144	6.17825e-11
GPR119	Xq26.1	-0.333166	6.15959e-11
VASP	19q13.32	-0.333268	6.07258e-11
MMP12	11q22.2	-0.333341	6.01126e-11
PLEKHA8	7p14.3	-0.333345	6.00809e-11
EFCAB7	1p31.3	-0.333395	5.96656e-11
CEP41	7q32.2	-0.333474	5.90062e-11
TMEM132A	11q12.2	-0.333526	5.85828e-11
CBX2	17q25.3	-0.333719	5.70294e-11
ZNF213	16p13.3	-0.333813	5.6284e-11
SFSWAP	12q24.33	-0.333917	5.54688e-11
RAD21	8q24.11	-0.334001	5.48221e-11
GEMIN5	5q33.2	-0.334216	5.31982e-11
ZNF766	19q13.41	-0.334531	5.09084e-11
ABCC1	16p13.11	-0.334683	4.9833e-11
SPINDOC	11q13.1	-0.334776	4.91904e-11
SNX27	1q21.3	-0.334816	4.89189e-11
ABCC5	3q27.1	-0.334882	4.84663e-11
PKN1	19p13.12	-0.334955	4.79723e-11
ZNF550	19q13.43	-0.335031	4.7464e-11
SPATA5	4q28.1	-0.335065	4.72365e-11
CDON	11q24.2	-0.335076	4.71636e-11
CDK1	10q21.2	-0.335124	4.68489e-11
WASF2	1p36.11	-0.335266	4.59266e-11
RPS6KC1	1q32.3	-0.33535	4.5387e-11
PSMC3IP	17q21.2	-0.335386	4.51583e-11
C17ORF75	17q11.2	-0.335406	4.50319e-11
CASKIN1	16p13.3	-0.335513	4.43619e-11
WASHC2C	10q11.22	-0.335671	4.33822e-11
IFNGR2	21q22.11	-0.335763	4.28261e-11
RAD54L	1p34.1	-0.336085	4.09288e-11
DBF4	7q21.12	-0.336088	4.09133e-11
FAM131A	3q27.1	-0.336124	4.07052e-11
CCDC86	11q12.2	-0.336136	4.06408e-11
SMOX	20p13	-0.336216	4.01853e-11
MYBBP1A	17p13.2	-0.336332	3.95299e-11
GNPAT	1q42.2	-0.33642	3.90435e-11
KIF14	1q32.1	-0.336494	3.86415e-11
BAZ2A	12q13.3	-0.33655	3.83347e-11
CCDC137	17q25.3	-0.336612	3.80015e-11
FAM72D	1q21.1	-0.336719	3.74349e-11
PYCR1	17q25.3	-0.336786	3.70799e-11
PRC1	15q26.1	-0.336796	3.70287e-11
ADORA1	1q32.1	-0.336872	3.66331e-11
PLEKHB2	2q21.1	-0.336919	3.63933e-11
FAM168B	2q21.1	-0.337038	3.57846e-11
HGS	17q25.3	-0.337074	3.56031e-11
CLK2	1q22	-0.337081	3.55688e-11
GDF11	12q13.2	-0.337172	3.51117e-11
STIL	1p33	-0.337285	3.45591e-11
HDAC11	3p25.1	-0.337325	3.43606e-11
CHORDC1	11q14.3	-0.337335	3.43143e-11
HNRNPM	19p13.2	-0.337366	3.41614e-11
LINC01096	4p15.33	-0.337431	3.38516e-11
DSCR9	21q22.13	-0.337512	3.3466e-11
NLE1	17q12	-0.337662	3.27641e-11
ATXN7L3B	12q21.1	-0.337709	3.25446e-11
TTF2	1p13.1	-0.337868	3.18206e-11
XPNPEP1	10q25.1	-0.337884	3.1749e-11
LRRC37BP1	17q11.2	-0.338199	3.03636e-11
SERPINB1	6p25.2	-0.338321	2.98388e-11
VLDLR	9p24.2	-0.33838	2.95939e-11
GGPS1	1q42.3	-0.338503	2.90816e-11
SIX4	14q23.1	-0.338536	2.89444e-11
ARL4A	7p21.3	-0.338562	2.8839e-11
HTR1D	1p36.12	-0.33858	2.87649e-11
HAUS5	19q13.12	-0.338639	2.85219e-11
RFX6	6q22.1	-0.338666	2.84126e-11
C10ORF91	10q26.3	-0.338813	2.78251e-11
C22ORF23	22q13.1	-0.338865	2.76202e-11
ORC6	16q11.2	-0.338943	2.73176e-11
CCNB2	15q22.2	-0.338974	2.71981e-11
KDM2B	12q24.31	-0.338988	2.71433e-11
SLC4A11	20p13	-0.33899	2.71361e-11
FHDC1	4q31.3	-0.339131	2.65954e-11
USP36	17q25.3	-0.339135	2.6581e-11
RTL10	22q11.21	-0.339254	2.61339e-11
POLR3C	1q21.1	-0.339288	2.60095e-11
LEMD2	6p21.31	-0.339413	2.55503e-11
MAP3K8	10p11.23	-0.339434	2.5472e-11
SNHG20	17q25.2	-0.339523	2.51542e-11
KIF18B	17q21.31	-0.339536	2.51042e-11
DYNC1H1	14q32.31	-0.339764	2.43034e-11
VGLL4	3p25.3-p25.2	-0.339831	2.4072e-11
GGA2	16p12.2	-0.339842	2.40337e-11
KIF4A	Xq13.1	-0.340026	2.34103e-11
MDK	11p11.2	-0.340126	2.3078e-11
MCM2	3q21.3	-0.340132	2.30579e-11
CCT6A	7p11.2	-0.340166	2.29461e-11
ATXN2	12q24.12	-0.340172	2.29293e-11
PRMT1	19q13.33	-0.340217	2.27798e-11
SLC52A2	8q24.3	-0.340222	2.27639e-11
PCGF2	17q12	-0.340292	2.25369e-11
DESI2	1q44	-0.340379	2.22592e-11
CALM3	19q13.32	-0.340379	2.22584e-11
SHCBP1	16q11.2	-0.340438	2.20718e-11
TRIM59	3q25.33	-0.340526	2.17975e-11
CENPI	Xq22.1	-0.340606	2.15477e-11
HOMER3	19p13.11	-0.340768	2.10553e-11
NCAPD3	11q25	-0.341031	2.02761e-11
VRK2	2p16.1	-0.341036	2.02633e-11
UGGT1	2q14.3	-0.341207	1.9771e-11
PROCA1	17q11.2	-0.341213	1.97551e-11
FIGNL1	7p12.2	-0.341299	1.95114e-11
TLK2	17q23.2	-0.341314	1.94715e-11
KIAA1841	2p15	-0.341396	1.9242e-11
CDC20	1p34.2	-0.341427	1.91581e-11
TACC3	4p16.3	-0.341454	1.90823e-11
GIP	17q21.32	-0.341527	1.88838e-11
PNMA1	14q24.3	-0.34161	1.86619e-11
LGR5	12q21.1	-0.341613	1.86524e-11
MASTL	10p12.1	-0.34169	1.8449e-11
KDM1B	6p22.3	-0.34171	1.83936e-11
RPRM	2q23.3	-0.341727	1.83509e-11
UTP4	16q22.1	-0.341772	1.8232e-11
CSNK1G1	15q22.31	-0.341803	1.81514e-11
B4GALNT3	12p13.33	-0.341969	1.77218e-11
ANKFN1	17q22	-0.342109	1.737e-11
EZH2	7q36.1	-0.342161	1.72394e-11
DLX1	2q31.1	-0.342657	1.60513e-11
SHLD1	20p12.3	-0.342743	1.58539e-11
PARD6G	18q23	-0.342837	1.56396e-11
ZBTB2	6q25.1	-0.342838	1.56377e-11
NCBP2	3q29	-0.342865	1.55771e-11
ZNF280C	Xq26.1	-0.342989	1.53013e-11
COIL	17q22	-0.343017	1.52393e-11
ZNF8	19q13.43	-0.343175	1.48965e-11
ATF6B	6p21.32	-0.343262	1.47092e-11
TOP2A	17q21.2	-0.343402	1.44157e-11
C20ORF204	20q13.33	-0.343425	1.43683e-11
ATP13A2	1p36.13	-0.343512	1.4188e-11
MTFR2	6q23.3	-0.343617	1.39752e-11
KDM1A	1p36.12	-0.343718	1.37709e-11
PRR5L	11p13-p12	-0.343719	1.377e-11
SMG5	1q22	-0.343758	1.36927e-11
PPP2R2C	4p16.1	-0.34376	1.36892e-11
IARS	9q22.31	-0.343813	1.35835e-11
TET3	2p13.1	-0.343843	1.35259e-11
METTL6	3p25.1	-0.343873	1.3467e-11
CKAP2	13q14.3	-0.344079	1.30707e-11
GPATCH4	1q22-q23.1	-0.344138	1.2959e-11
LOC646762	7p14.3	-0.344431	1.24211e-11
NCOA6	20q11.22	-0.34446	1.23678e-11
XPOT	12q14.2	-0.344594	1.21299e-11
CENPA	2p23.3	-0.344605	1.2111e-11
STXBP4	17q22	-0.344664	1.20069e-11
KCTD2	17q25.1	-0.344736	1.1883e-11
INPPL1	11q13.4	-0.34475	1.18593e-11
KCTD10	12q24.11	-0.344786	1.17975e-11
SLC29A4	7p22.1	-0.345011	1.14183e-11
SMARCE1	17q21.2	-0.345162	1.11691e-11
RCOR3	1q32.2-q32.3	-0.345297	1.0952e-11
PPP1R9B	17q21.33	-0.345401	1.07873e-11
LRP8	1p32.3	-0.345812	1.01618e-11
LHFPL2	5q14.1	-0.345839	1.01219e-11
LARP1	5q33.2	-0.345895	1.00385e-11
CDCA8	1p34.3	-0.345937	9.97774e-12
SLC36A1	5q33.1	-0.346007	9.87602e-12
UBQLN4	1q22	-0.346073	9.78128e-12
P3H4	17q21.2	-0.346292	9.47423e-12
GCM1	6p12.1	-0.346335	9.41426e-12
GIT1	17q11.2	-0.346458	9.24706e-12
CKAP2L	2q14.1	-0.346823	8.7667e-12
RAP1GAP2	17p13.3	-0.346851	8.73037e-12
NSF	17q21.31	-0.34697	8.58066e-12
TUFT1	1q21.3	-0.346971	8.57912e-12
HMGN4	6p22.2	-0.347189	8.30984e-12
GOLGA2P10	15q25.2	-0.347389	8.06933e-12
ZFP69B	1p34.2	-0.347481	7.96087e-12
TSPAN5	4q23	-0.347484	7.95781e-12
PIGC	1q24.3	-0.347677	7.73527e-12
ADORA2B	17p12	-0.347759	7.64333e-12
PARP1	1q42.12	-0.34776	7.64191e-12
RAB42	1p35.3	-0.347785	7.61441e-12
TUBA1B	12q13.12	-0.347833	7.56056e-12
ATP1B3	3q23	-0.347957	7.42432e-12
CDCA7	2q31.1	-0.348157	7.20938e-12
STIP1	11q13.1	-0.348211	7.15255e-12
CCR3	3p21.31	-0.348347	7.01021e-12
AEBP2	12p12.3	-0.34839	6.96684e-12
ROBO1	3p12.3	-0.348408	6.94805e-12
SCMH1	1p34.2	-0.348689	6.66684e-12
DDX42	17q23.3	-0.348691	6.66511e-12
GPR107	9q34.11	-0.348692	6.66395e-12
MCM4	8q11.21	-0.348739	6.61774e-12
CLSTN1	1p36.22	-0.348882	6.48011e-12
ZFP64	20q13.2	-0.34896	6.40575e-12
DARS	2q21.3	-0.348992	6.376e-12
FOXRED2	22q12.3	-0.349012	6.35658e-12
ZNF692	1q44	-0.349051	6.32035e-12
NBEAL2	3p21.31	-0.349077	6.29576e-12
MMP10	11q22.2	-0.349156	6.22324e-12
ANAPC7	12q24.11	-0.349199	6.18405e-12
SF3B3	16q22.1	-0.349211	6.1731e-12
TBC1D22B	6p21.2	-0.349268	6.12096e-12
CASP2	7q34	-0.349423	5.98302e-12
C15ORF39	15q24.2	-0.34949	5.92405e-12
CEP164	11q23.3	-0.349521	5.89724e-12
IBSP	4q22.1	-0.349687	5.75415e-12
CBX6	22q13.1	-0.349928	5.55268e-12
SAP130	2q14.3	-0.349933	5.54846e-12
XRCC2	7q36.1	-0.350003	5.49104e-12
EIF3D	22q12.3	-0.350098	5.41469e-12
NCDN	1p34.3	-0.350152	5.37152e-12
OLIG3	6q23.3	-0.350248	5.29558e-12
USP22	17p11.2	-0.350377	5.19576e-12
PPP1R2	3q29	-0.350446	5.14271e-12
PROSER3	19q13.12	-0.350494	5.10627e-12
IKBKE	1q32.1	-0.350522	5.08522e-12
MRPS23	17q22	-0.350574	5.04589e-12
PRMT2	21q22.3	-0.350655	4.98601e-12
KIF5B	10p11.22	-0.350942	4.77819e-12
AURKB	17p13.1	-0.351056	4.69772e-12
TGS1	8q12.1	-0.351103	4.66504e-12
CCNB1	5q13.2	-0.351223	4.58286e-12
EME1	17q21.33	-0.351251	4.56356e-12
ZNF821	16q22.2	-0.351499	4.39842e-12
MYO19	17q12	-0.351615	4.32334e-12
TTLL1	22q13.2	-0.351649	4.30135e-12
MIER2	19p13.3	-0.351663	4.2929e-12
UCN2	3p21.31	-0.35196	4.10705e-12
STK35	20p13	-0.352015	4.07373e-12
MFSD5	12q13.13	-0.352094	4.02602e-12
PLK4	4q28.1	-0.352139	3.99909e-12
H2AFZ	4q23	-0.352269	3.92206e-12
SRPK1	6p21.31	-0.352396	3.84873e-12
FIP1L1	4q12	-0.352562	3.75446e-12
UBE2T	1q32.1	-0.352584	3.74227e-12
SF3A2	19p13.3	-0.352639	3.71149e-12
YY1AP1	1q22	-0.352706	3.67464e-12
TMEM51	1p36.21	-0.352812	3.61693e-12
H2AFX	11q23.3	-0.352856	3.59333e-12
ORC1	1p32.3	-0.352912	3.56336e-12
ZDHHC7	16q24.1	-0.353265	3.37978e-12
ADRA2C	4p16.3	-0.353523	3.25193e-12
CENPE	4q24	-0.353591	3.21876e-12
ZNF234	19q13.31	-0.353917	3.06547e-12
CDK16	Xp11.3	-0.353941	3.05434e-12
CCT5	5p15.2	-0.353981	3.03612e-12
HJURP	2q37.1	-0.354016	3.02011e-12
NSMAF	8q12.1	-0.354186	2.94398e-12
GINS1	20p11.21	-0.354543	2.79042e-12
PRRC2C	1q24.3	-0.354557	2.78457e-12
VPS37C	11q12.2	-0.354571	2.77863e-12
DDR1	6p21.33	-0.354658	2.74257e-12
FAM3B	21q22.3	-0.35496	2.62085e-12
ARID4B	1q42.3	-0.355014	2.59966e-12
SLC39A1	1q21.3	-0.355134	2.55294e-12
PRPF4B	6p25.2	-0.35518	2.5354e-12
GCN1	12q24.23	-0.355228	2.51714e-12
NCAPG	4p15.31	-0.355436	2.43925e-12
MAP3K1	5q11.2	-0.355454	2.43269e-12
PIAS3	1q21.1	-0.355462	2.42981e-12
CHD4	12p13.31	-0.355508	2.41301e-12
MYADML2	17q25.3	-0.355562	2.39351e-12
STK17A	7p13	-0.355711	2.34034e-12
DUSP22	6p25.3	-0.355875	2.28286e-12
ADNP	20q13.13	-0.355915	2.26939e-12
FHL3	1p34.3	-0.356067	2.21779e-12
CLIP2	7q11.23	-0.356553	2.0605e-12
RPGRIP1L	16q12.2	-0.356663	2.02665e-12
EDARADD	1q42.3-q43	-0.356737	2.00379e-12
FOXJ1	17q25.1	-0.356877	1.96188e-12
TNFRSF9	1p36.23	-0.356882	1.9605e-12
YWHAZ	8q22.3	-0.356954	1.93916e-12
TNFRSF19	13q12.12	-0.357053	1.91009e-12
PNCK	Xq28	-0.357406	1.8106e-12
COG2	1q42.2	-0.357519	1.77992e-12
KANSL1	17q21.31	-0.357686	1.73515e-12
FAAP24	19q13.11	-0.358069	1.63689e-12
TRIM54	2p23.3	-0.358123	1.62367e-12
NUF2	1q23.3	-0.358155	1.61581e-12
WDHD1	14q22.2-q22.3	-0.358173	1.61123e-12
CIP2A	3q13.13	-0.35819	1.60722e-12
RPL13P5	12p13.31	-0.358203	1.6039e-12
PYGB	20p11.21	-0.358236	1.596e-12
SSB	2q31.1	-0.358396	1.55744e-12
DNAAF5	7p22.3	-0.358434	1.54858e-12
TMCC1	3q22.1	-0.358614	1.50652e-12
RRP15	1q41	-0.358743	1.47723e-12
EDC3	15q24.1	-0.358796	1.46536e-12
TTK	6q14.1	-0.35882	1.4599e-12
TSEN2	3p25.2	-0.358905	1.44109e-12
GMPS	3q25.31	-0.359033	1.41331e-12
SAPCD2	9q34.3	-0.359039	1.41205e-12
HSF2	6q22.31	-0.359119	1.39489e-12
PRKCD	3p21.1	-0.359226	1.37223e-12
MCM10	10p13	-0.359246	1.36798e-12
KHDRBS1	1p35.2	-0.359324	1.3518e-12
CDK5R2	2q35	-0.359334	1.34984e-12
MAU2	19p13.11	-0.359351	1.34635e-12
KHDC4	1q22	-0.359375	1.34137e-12
ZNF283	19q13.31	-0.359567	1.30258e-12
ACVR1	2q24.1	-0.359686	1.27908e-12
ZNF385A	12q13.13	-0.359712	1.27401e-12
SUCO	1q24.3	-0.359723	1.27181e-12
KHSRP	19p13.3	-0.359836	1.25004e-12
PARPBP	12q23.2	-0.359934	1.23143e-12
KIF15	3p21.31	-0.36001	1.21715e-12
KIFC1	6p21.32	-0.360089	1.20241e-12
PAFAH1B3	19q13.2	-0.360341	1.15694e-12
FAM220A	7p22.1	-0.360353	1.15473e-12
INTS4	11q14.1	-0.360492	1.1304e-12
FNBP1L	1p22.1	-0.360534	1.12311e-12
SUV39H2	10p13	-0.360534	1.12303e-12
ATAT1	6p21.33	-0.360759	1.08502e-12
TRMT6	20p12.3	-0.360852	1.06963e-12
ARHGEF39	9p13.3	-0.361091	1.03106e-12
CWC27	5q12.3	-0.361158	1.02048e-12
FBXL19-AS1	16p11.2	-0.361165	1.01928e-12
UTP20	12q23.2	-0.36118	1.01691e-12
WDR75	2q32.2	-0.361269	1.00314e-12
LPCAT1	5p15.33	-0.361288	1.00016e-12
FAM222B	17q11.2	-0.361369	9.87761e-13
C11ORF49	11p11.2	-0.361649	9.46064e-13
WAC	10p12.1|10p12.1-p11.2	-0.361673	9.42573e-13
FANCD2	3p25.3	-0.361866	9.14993e-13
GTSE1	22q13.31	-0.36203	8.92135e-13
MARCKS	6q21	-0.362102	8.82316e-13
DYNC1I1	7q21.3	-0.362134	8.7796e-13
UHRF1BP1	6p21.31	-0.362292	8.56817e-13
DLX3	17q21.33	-0.362498	8.29896e-13
BCL9	1q21.2	-0.362555	8.22586e-13
PLAGL2	20q11.21	-0.362622	8.1419e-13
MED20	6p21.1	-0.362668	8.08419e-13
TRIM45	1p13.1	-0.362668	8.08353e-13
MTMR3	22q12.2	-0.363016	7.66029e-13
PSRC1	1p13.3	-0.363126	7.53102e-13
ERCC6L	Xq13.1	-0.363273	7.36075e-13
CCNF	16p13.3	-0.36341	7.20628e-13
SAE1	19q13.32	-0.363548	7.0539e-13
KAT2A	17q21.2	-0.363942	6.63532e-13
TOMM20	1q42.3	-0.363961	6.61592e-13
KIF11	10q23.33	-0.36408	6.49476e-13
ZNF646	16p11.2	-0.364194	6.38086e-13
MATR3	5q31.2	-0.36422	6.35469e-13
ECT2	3q26.31	-0.364298	6.27799e-13
C4ORF46	4q32.1	-0.364451	6.13011e-13
CKAP5	11p11.2	-0.364488	6.09495e-13
PABPC4	1p34.3	-0.364638	5.95446e-13
RBM14	11q13.2	-0.364641	5.95174e-13
LOC728743	7q36.1	-0.364662	5.93226e-13
THUMPD2	2p22.1|2p22-p21	-0.364747	5.85475e-13
BCL9L	11q23.3	-0.364767	5.83625e-13
RGS9BP	19q13.11	-0.364776	5.82826e-13
DRAM1	12q23.2	-0.364788	5.81692e-13
STK39	2q24.3	-0.364792	5.81337e-13
MRE11	11q21	-0.364843	5.76766e-13
MSL1	17q21.1	-0.364953	5.66971e-13
C1ORF131	1q42.2	-0.365168	5.48242e-13
MELK	9p13.2	-0.365169	5.48201e-13
HILPDA	7q32.1	-0.36522	5.43801e-13
STRN4	19q13.32	-0.365269	5.39702e-13
NFAT5	16q22.1	-0.365472	5.22836e-13
DVL3	3q27.1	-0.365524	5.18615e-13
ARMC9	2q37.1	-0.365891	4.89712e-13
GPATCH2	1q41	-0.365905	4.88663e-13
NAT10	11p13	-0.366089	4.74737e-13
PPP1CC	12q24.11	-0.366124	4.72161e-13
MPZL1	1q24.2	-0.366396	4.52494e-13
BTF3L4	1p32.3	-0.366723	4.29833e-13
DBF4B	17q21.31|17q21	-0.3668	4.24713e-13
TNFRSF21	6p12.3	-0.366987	4.12415e-13
MYBL2	20q13.12	-0.367458	3.8303e-13
LRRC36	16q22.1	-0.367461	3.82822e-13
PHF20	20q11.22-q11.23	-0.367677	3.70055e-13
BMF	15q15.1	-0.367746	3.66043e-13
YAP1	11q22.1	-0.367833	3.61028e-13
CDT1	16q24.3	-0.36827	3.37035e-13
SF3B4	1q21.2	-0.368859	3.07092e-13
FAM104A	17q25.1	-0.369096	2.9579e-13
STRIP1	1p13.3	-0.369169	2.92421e-13
PGC	6p21.1	-0.369292	2.86799e-13
ZNF605	12q24.33	-0.369418	2.81136e-13
ARHGAP12	10p11.22	-0.369606	2.72858e-13
EXO1	1q43	-0.369621	2.72235e-13
BTN2A1	6p22.2	-0.369695	2.69065e-13
MAML1	5q35.3	-0.36973	2.67556e-13
ZNF92	7q11.21	-0.369817	2.63916e-13
TUBB	6p21.33	-0.369879	2.61327e-13
SLC39A10	2q32.3	-0.370031	2.55072e-13
NAA40	11q13.1	-0.370087	2.52843e-13
CEP89	19q13.11	-0.370398	2.40648e-13
ARF3	12q13.12	-0.370466	2.38061e-13
PFAS	17p13.1	-0.370492	2.3709e-13
IST1	16q22.2	-0.370659	2.30855e-13
MCM8	20p12.3	-0.371081	2.15889e-13
SRARP	1p36.13	-0.371206	2.11633e-13
ZFC3H1	12q21.1	-0.371289	2.08856e-13
ZBTB45	19q13.43	-0.371444	2.03748e-13
GTPBP4	10p15.3	-0.371573	1.99607e-13
VPS72	1q21.3	-0.371653	1.97068e-13
EFTUD2	17q21.31	-0.371826	1.91699e-13
DLX4	17q21.33	-0.371867	1.90446e-13
PLXNA3	Xq28	-0.371917	1.88925e-13
FXR1	3q26.33	-0.371944	1.88129e-13
AACS	12q24.31	-0.371978	1.8711e-13
BIK	22q13.2	-0.372209	1.80317e-13
CCDC138	2q13	-0.372352	1.76237e-13
DNM1	9q34.11	-0.372376	1.75571e-13
PHACTR1	6p24.1	-0.37247	1.72954e-13
DDN	12q13.12	-0.37269	1.66969e-13
PPEF1	Xp22.13	-0.372781	1.64554e-13
THADA	2p21	-0.372944	1.60319e-13
KCTD7	7q11.21	-0.373051	1.57575e-13
FAM217B	20q13.33	-0.373071	1.57065e-13
AGPS	2q31.2	-0.373331	1.50656e-13
ZNRF3	22q12.1	-0.373607	1.44133e-13
INCENP	11q12.3	-0.373782	1.40136e-13
ERCC3	2q14.3	-0.373823	1.39224e-13
AGBL5	2p23.3	-0.374101	1.33125e-13
GOLGA7B	10q24.2	-0.374221	1.30585e-13
RBM12B	8q22.1	-0.37423	1.304e-13
LARP4B	10p15.3	-0.374271	1.29529e-13
HNRNPR	1p36.12	-0.374435	1.26163e-13
MDC1	6p21.33	-0.374608	1.22694e-13
KIAA0753	17p13.1	-0.374617	1.225e-13
ATXN2L	16p11.2	-0.374897	1.17105e-13
GOLGA3	12q24.33	-0.374955	1.16007e-13
AP4M1	7q22.1	-0.375011	1.14974e-13
KIF20A	5q31.2	-0.375148	1.12458e-13
CYTH2	19q13.33	-0.3752	1.11519e-13
ZNF687	1q21.3	-0.375257	1.10484e-13
TNRC18	7p22.1	-0.375312	1.09518e-13
DHX34	19q13.32	-0.375342	1.08986e-13
NONO	Xq13.1	-0.375359	1.08681e-13
PSME3	17q21.31	-0.375675	1.03276e-13
RNF144A	2p25.1	-0.375737	1.02234e-13
MED28	4p15.32	-0.375981	9.82817e-14
DENND4B	1q21.3	-0.376232	9.43631e-14
CCT2	12q15	-0.37625	9.40939e-14
CEP295	11q21	-0.37629	9.34799e-14
KIF23	15q23	-0.376333	9.28366e-14
ADNP2	18q23	-0.3764	9.18288e-14
HNRNPA2B1	7p15.2	-0.376702	8.74297e-14
STARD3NL	7p14.1	-0.376741	8.68859e-14
SYNGR1	22q13.1	-0.377378	7.83409e-14
DLGAP5	14q22.3	-0.377614	7.53888e-14
RBM12	20q11.22	-0.37762	7.53137e-14
SLC7A6OS	16q22.1	-0.377854	7.24987e-14
NCL	2q37.1	-0.377875	7.22452e-14
ZCCHC12	Xq24	-0.378091	6.97449e-14
MFSD10	4p16.3	-0.378198	6.85368e-14
PPRC1	10q24.32	-0.378241	6.80566e-14
CUEDC1	17q22	-0.378352	6.68332e-14
ETV4	17q21.31	-0.378404	6.6276e-14
NOP56	20p13	-0.378464	6.56234e-14
CST1	20p11.21	-0.378568	6.45216e-14
NUP107	12q15	-0.378955	6.05653e-14
EDC4	16q22.1	-0.378998	6.01389e-14
USP54	10q22.2	-0.379069	5.94444e-14
HNRNPUL1	19q13.2	-0.379108	5.90669e-14
PIAS1	15q23	-0.379176	5.84102e-14
BMS1	10q11.21	-0.379176	5.84076e-14
ACIN1	14q11.2	-0.379259	5.76272e-14
E2F4	16q22.1	-0.379421	5.61169e-14
TAF8	6p21.1	-0.379435	5.59842e-14
QSER1	11p13	-0.379451	5.58429e-14
NAT8L	4p16.3	-0.379468	5.56833e-14
ATIC	2q35	-0.379744	5.32193e-14
ENAH	1q42.12	-0.379853	5.22787e-14
SAMD1	19p13.12	-0.379864	5.2183e-14
SOCS7	17q12	-0.379959	5.13709e-14
SLC6A10P	16p11.2	-0.37996	5.13652e-14
CDYL	6p25.1	-0.380085	5.03211e-14
HEATR6	17q23.1	-0.380243	4.9036e-14
SPATA17	1q41	-0.380253	4.89552e-14
GPRIN1	5q35.2	-0.380414	4.76749e-14
CIZ1	9q34.11	-0.380546	4.66509e-14
KIF2A	5q12.1	-0.380923	4.38406e-14
MAD2L1	4q27	-0.381167	4.2116e-14
UBR5	8q22.3	-0.381327	4.10205e-14
CORO1C	12q24.11	-0.381412	4.04497e-14
WDR12	2q33.2	-0.381426	4.03551e-14
MSI2	17q22	-0.381435	4.02947e-14
HDAC4	2q37.3	-0.381779	3.80682e-14
TESMIN	11q13.3	-0.381833	3.77335e-14
ANP32E	1q21.2	-0.381901	3.73114e-14
NFXL1	4p12	-0.382118	3.59916e-14
BAK1	6p21.31	-0.382216	3.54177e-14
NEK2	1q32.3	-0.382323	3.47949e-14
UCK2	1q24.1	-0.382576	3.33669e-14
SENP1	12q13.11	-0.382673	3.2834e-14
AP2B1	17q12	-0.382987	3.11674e-14
KIAA1522	1p35.1	-0.383004	3.10797e-14
PRIM2	6p11.2	-0.3834	2.91045e-14
MID1IP1	Xp11.4	-0.383425	2.8984e-14
AXIN2	17q24.1	-0.383775	2.73457e-14
TPD52L2	20q13.33	-0.383981	2.64228e-14
UBTF	17q21.31	-0.384155	2.56681e-14
TOX3	16q12.1	-0.384312	2.50071e-14
RERE	1p36.23	-0.384384	2.47078e-14
KIF2C	1p34.1	-0.384575	2.39341e-14
KDM3A	2p11.2	-0.385354	2.10136e-14
MNT	17p13.3	-0.385547	2.03456e-14
TRIM16	17p12	-0.385587	2.02085e-14
HDAC2	6q21	-0.385743	1.96895e-14
TSR1	17p13.3	-0.385776	1.95816e-14
DCAF7	17q23.3	-0.386289	1.7968e-14
MYEF2	15q21.1	-0.386323	1.78662e-14
CSNK1D	17q25.3	-0.386328	1.78497e-14
POLD1	19q13.33	-0.386524	1.72733e-14
DKC1	Xq28	-0.386653	1.6901e-14
RHBDF2	17q25.1	-0.386721	1.67096e-14
PRKAA2	1p32.2	-0.386799	1.64921e-14
ARHGEF11	1q23.1	-0.386906	1.61981e-14
CEP170	1q43	-0.387056	1.57937e-14
ZNF473	19q13.33	-0.387299	1.5161e-14
SH3BP5L	1q44	-0.38735	1.50329e-14
CDCA4	14q32.33	-0.387695	1.4184e-14
SART3	12q23.3	-0.387726	1.41087e-14
NRBP1	2p23.3	-0.387883	1.37415e-14
NSD2	4p16.3	-0.387901	1.36995e-14
SGO2	2q33.1	-0.387934	1.36223e-14
CDC123	10p14-p13	-0.388211	1.30007e-14
DEPDC1B	5q12.1	-0.38845	1.24862e-14
POLA1	Xp22.11-p21.3	-0.3885	1.23807e-14
CA9	9p13.3	-0.388707	1.19555e-14
TRIM67	1q42.2	-0.388975	1.14249e-14
KIF18A	11p14.1	-0.389187	1.10222e-14
IGDCC3	15q22.31	-0.389398	1.0635e-14
RPA1	17p13.3	-0.389403	1.06266e-14
PRR12	19q13.33	-0.389426	1.05839e-14
B4GALT3	1q23.3	-0.389798	9.93687e-15
TSN	2q14.3	-0.390329	9.0794e-15
IPW	15q11.2	-0.390663	8.57776e-15
NPM3	10q24.32	-0.390722	8.49181e-15
GTPBP2	6p21.1	-0.391139	7.90997e-15
MORC2	22q12.2	-0.39137	7.60451e-15
ZNF623	8q24.3	-0.392188	6.61222e-15
TICRR	15q26.1	-0.392572	6.19128e-15
RNF214	11q23.3	-0.39265	6.10872e-15
EWSR1	22q12.2	-0.392687	6.06998e-15
HASPIN	17p13.2	-0.392883	5.86946e-15
ANLN	7p14.2	-0.39307	5.68448e-15
TCERG1	5q32	-0.393135	5.6206e-15
MCM3	6p12.2	-0.393144	5.61234e-15
NKPD1	19q13.32	-0.393171	5.58617e-15
MTHFD1L	6q25.1	-0.393674	5.12375e-15
TJAP1	6p21.1	-0.394196	4.68286e-15
TRIP13	5p15.33	-0.394777	4.23675e-15
DPF2	11q13.1	-0.394961	4.10399e-15
ZMYM3	Xq13.1	-0.395108	4.00097e-15
DHX57	2p22.1	-0.395175	3.95485e-15
RALY	20q11.22	-0.395324	3.85452e-15
RNPS1	16p13.3	-0.395356	3.83336e-15
GOLGA2P7	15q25.2	-0.395504	3.73621e-15
PBX2	6p21.32	-0.395595	3.67762e-15
DNAJC10	2q32.1	-0.395608	3.66937e-15
LMNB2	19p13.3	-0.395933	3.46829e-15
ACLY	17q21.2	-0.396054	3.39633e-15
PI4KB	1q21.3	-0.396887	2.93904e-15
TAF1A	1q41	-0.396968	2.89772e-15
KDM5B	1q32.1	-0.396985	2.88929e-15
LBR	1q42.12	-0.397613	2.59004e-15
PKM	15q23	-0.397873	2.47523e-15
GRK3	22q12.1	-0.39791	2.45911e-15
USP39	2p11.2	-0.397929	2.45114e-15
SMARCA4	19p13.2	-0.39796	2.43788e-15
TPR	1q31.1	-0.398019	2.41284e-15
ACTL6A	3q26.33	-0.398056	2.39728e-15
NCOA5	20q13.12	-0.398156	2.35584e-15
CSE1L	20q13.13	-0.398371	2.26901e-15
CEP55	10q23.33	-0.398507	2.21577e-15
RNF145	5q33.3	-0.398626	2.17014e-15
FRAS1	4q21.21	-0.398673	2.15246e-15
SOX4	6p22.3	-0.399073	2.00655e-15
GPD2	2q24.1	-0.39979	1.76951e-15
CENPF	1q41	-0.400018	1.70007e-15
FMNL2	2q23.3	-0.40019	1.64934e-15
PLK1	16p12.2	-0.400192	1.64898e-15
TCTN2	12q24.31	-0.400476	1.56856e-15
MCM6	2q21.3	-0.400579	1.54036e-15
MARCKSL1	1p35.1	-0.400756	1.49289e-15
SLC26A11	17q25.3	-0.401024	1.42418e-15
ASAP1	8q24.21-q24.22	-0.401077	1.41077e-15
FUBP1	1p31.1	-0.401327	1.35004e-15
PTPN23	3p21.31	-0.401329	1.34951e-15
MED22	9q34.2	-0.401993	1.20002e-15
KDM3B	5q31.2	-0.40214	1.16923e-15
ODAM	4q13.3	-0.402549	1.08754e-15
ZNF142	2q35	-0.402631	1.07177e-15
ADAM9	8p11.22	-0.402876	1.02623e-15
RFWD3	16q23.1	-0.402901	1.02179e-15
BUB1	2q13	-0.402932	1.01612e-15
KANSL2	12q13.11	-0.402955	1.01189e-15
FERMT1	20p12.3	-0.403005	1.00304e-15
NUDT17	1q21.1	-0.403058	9.93589e-16
UBE2I	16p13.3	-0.403763	8.7663e-16
TLCD5	11q23.3	-0.403832	8.65811e-16
CSPP1	8q13.1-q13.2	-0.403929	8.51111e-16
NDRG3	20q11.23	-0.404051	8.32758e-16
ROR1	1p31.3	-0.40435	7.89458e-16
DNAJB13	11q13.4	-0.404796	7.29164e-16
DHX37	12q24.31	-0.404956	7.08559e-16
RIT1	1q22	-0.405068	6.94564e-16
POGK	1q24.1	-0.405118	6.88388e-16
MTBP	8q24.12	-0.405161	6.83108e-16
INPP5J	22q12.2	-0.405237	6.73823e-16
NKAIN1	1p35.2	-0.405259	6.71157e-16
PHIP	6q14.1	-0.405532	6.39168e-16
TMEM67	8q22.1	-0.405629	6.28221e-16
UBAP2	9p13.3	-0.405822	6.06779e-16
TPM3	1q21.3	-0.406034	5.84151e-16
JRK	8q24.3	-0.406073	5.80164e-16
HPS4	22q12.1	-0.406201	5.66941e-16
LINC00205	21q22.3	-0.406406	5.46469e-16
COLCA2	11q23.1	-0.406577	5.29964e-16
CD3EAP	19q13.32	-0.406602	5.27535e-16
FAM117B	2q33.2	-0.406611	5.26695e-16
TMEM201	1p36.22	-0.406622	5.25688e-16
ABL2	1q25.2	-0.406845	5.04981e-16
PUS7	7q22.3	-0.406853	5.04248e-16
ANAPC1	2q13	-0.40713	4.79788e-16
NPM1	5q35.1	-0.407197	4.74009e-16
SLF2	10q24.31	-0.407851	4.21297e-16
TONSL	8q24.3	-0.407929	4.15439e-16
PTBP1	19p13.3	-0.408014	4.09079e-16
SLC7A11	4q28.3	-0.408076	4.04522e-16
NFE2L3	7p15.2	-0.40824	3.92742e-16
MSH5	6p21.33	-0.408562	3.70541e-16
MAPRE1	20q11.21	-0.40864	3.65311e-16
YEATS2	3q27.1	-0.40866	3.63987e-16
CD2AP	6p12.3	-0.408897	3.48697e-16
ZBTB40	1p36.12	-0.408948	3.45537e-16
EIF4ENIF1	22q12.2	-0.409352	3.21134e-16
HNRNPA1L2	13q14.3	-0.409373	3.1991e-16
SOX12	20p13	-0.409382	3.19385e-16
MEX3A	1q22	-0.409554	3.09554e-16
DNASE1	16p13.3	-0.409577	3.0829e-16
CNOT3	19q13.42	-0.409654	3.03967e-16
BUB1B	15q15.1	-0.40974	2.99302e-16
SMURF2	17q23.3-q24.1	-0.41035	2.67877e-16
SMARCD1	12q13.12	-0.410421	2.64415e-16
RNF24	20p13	-0.410514	2.59999e-16
DSTYK	1q32.1	-0.410545	2.58508e-16
SFPQ	1p34.3	-0.410629	2.54624e-16
SLC6A9	1p34.1	-0.41069	2.51786e-16
TULP3	12p13.33	-0.411186	2.30003e-16
KDELR1	19q13.33	-0.411411	2.20746e-16
HSP90AB1	6p21.1	-0.411637	2.11821e-16
JADE2	5q31.1	-0.411737	2.07998e-16
CDK4	12q14.1	-0.411824	2.04729e-16
DCAF16	4p15.31	-0.412009	1.97915e-16
CCAR1	10q21.3	-0.412109	1.94296e-16
CHKA	11q13.2	-0.412236	1.89841e-16
USH1C	11p15.1	-0.412282	1.88256e-16
PITX1	5q31.1	-0.412446	1.82675e-16
BRD9	5p15.33	-0.412466	1.82011e-16
MED12	Xq13.1	-0.412724	1.73594e-16
TIGD1	2q37.1	-0.413086	1.62443e-16
FOXK1	7p22.1	-0.413333	1.5523e-16
CACNB4	2q23.3	-0.413736	1.44158e-16
U2SURP	3q23	-0.414173	1.32992e-16
NCAPH	2q11.2	-0.414403	1.2748e-16
TYRO3	15q15.1	-0.414428	1.26883e-16
LZTS2	10q24.31	-0.415049	1.13146e-16
FAM53C	5q31.2	-0.415083	1.12438e-16
TARBP1	1q42.2	-0.415514	1.03815e-16
ZNF143	11p15.4	-0.41559	1.02371e-16
TRIM11	1q42.13	-0.415918	9.63306e-17
MSH2	2p21-p16.3	-0.416648	8.41291e-17
VEZF1	17q22	-0.418166	6.34036e-17
E2F6	2p25.1	-0.418209	6.28897e-17
CEP250	20q11.22	-0.418904	5.52226e-17
TTC27	2p22.3	-0.418972	5.45308e-17
HNRNPL	19q13.2	-0.419186	5.23837e-17
KPNB1	17q21.32	-0.419562	4.88129e-17
ZNF282	7q36.1	-0.41962	4.82844e-17
HIF1AN	10q24.31	-0.420237	4.29988e-17
RHNO1	12p13.33	-0.420889	3.80309e-17
RIOK1	6p24.3	-0.420921	3.78033e-17
RUNDC1	17q21.31	-0.421606	3.32214e-17
USP21	1q23.3	-0.4219	3.14276e-17
ABCC10	6p21.1	-0.421906	3.13895e-17
RCC2	1p36.13	-0.422152	2.99612e-17
NPEPPS	17q21.32	-0.422904	2.59825e-17
NKX3-2	4p15.33	-0.423017	2.54325e-17
EFNA4	1q21.3	-0.423451	2.34163e-17
NUP37	12q23.2	-0.423731	2.22019e-17
NCAPD2	12p13.31	-0.42374	2.21637e-17
VPS54	2p15-p14	-0.424271	2.00341e-17
ZNF207	17q11.2	-0.424547	1.90056e-17
LIN9	1q42.12	-0.424676	1.85435e-17
EEF1E1	6p24.3	-0.425894	1.46899e-17
CSNK2A1	20p13	-0.426452	1.31992e-17
ZNF74	22q11.21	-0.426685	1.26215e-17
CASC3	17q21.1	-0.426964	1.19628e-17
NUAK2	1q32.1	-0.427183	1.14691e-17
DNAH14	1q42.12	-0.427514	1.07612e-17
MAFG-DT	17q25.3	-0.428039	9.72337e-18
NFYA	6p21.1	-0.428127	9.56117e-18
NAP1L1	12q21.2	-0.428351	9.15483e-18
RNMT	18p11.21	-0.428839	8.33095e-18
ARL6IP6	2q23.3	-0.428849	8.31564e-18
GTF3C2	2p23.3	-0.429464	7.38033e-18
LEF1	4q25	-0.429696	7.05612e-18
ZMYND8	20q13.12	-0.430526	6.00437e-18
PARD3	10p11.22-p11.21	-0.431143	5.32501e-18
INTS8	8q22.1	-0.431222	5.24328e-18
RHOBTB1	10q21.2	-0.431472	4.99347e-18
SNHG4	5q31.2	-0.43158	4.88919e-18
TAF6	7q22.1	-0.431956	4.54319e-18
NVL	1q42.11	-0.432358	4.19946e-18
CHEK1	11q24.2	-0.432555	4.0404e-18
CBFB	16q22.1	-0.433115	3.6198e-18
CNOT11	2q11.2	-0.433413	3.41427e-18
PIP4K2B	17q12	-0.433438	3.39773e-18
TFAP4	16p13.3	-0.435085	2.45621e-18
LDB1	10q24.32	-0.435463	2.27927e-18
BAMBI	10p12.1	-0.436414	1.88785e-18
ATXN7L3	17q21.31	-0.436436	1.87934e-18
MMS19	10q24.1	-0.437897	1.40538e-18
CLIC1	6p21.33	-0.438486	1.24963e-18
ILF2	1q21.3	-0.438646	1.21022e-18
CANT1	17q25.3	-0.438894	1.15155e-18
MATN3	2p24.1	-0.440811	7.83743e-19
STX6	1q25.3	-0.440995	7.55333e-19
TRIM65	17q25.1	-0.441798	6.42259e-19
WIF1	12q14.3	-0.441927	6.2577e-19
HSDL1	16q24.1	-0.442106	6.03537e-19
NUP93	16q13	-0.443118	4.91713e-19
SETDB1	1q21.3	-0.444138	3.99597e-19
RAD54B	8q22.1	-0.444205	3.94177e-19
EPRS	1q41	-0.444478	3.72916e-19
MED15	22q11.21	-0.444521	3.69637e-19
TTLL4	2q35	-0.44468	3.57857e-19
SLC6A8	Xq28	-0.444831	3.47001e-19
TBC1D3	17q12	-0.445122	3.26969e-19
RNF216	7p22.1	-0.445612	2.9579e-19
HCFC1	Xq28	-0.446691	2.37113e-19
CDK5R1	17q11.2	-0.446888	2.27722e-19
UBE2O	17q25.1	-0.448613	1.59607e-19
TP53BP1	15q15.3	-0.448615	1.59535e-19
C1ORF112	1q24.2	-0.449403	1.35533e-19
SMAD3	15q22.33	-0.449793	1.25023e-19
ZBTB12	6p21.33	-0.449825	1.24184e-19
LIMK1	7q11.23	-0.450872	9.98986e-20
EPS8L3	1p13.3	-0.451769	8.28716e-20
TRIM28	19q13.43	-0.453564	5.69058e-20
UBA2	19q13.11	-0.453992	5.20125e-20
BEND3	6q21	-0.45475	4.4337e-20
CBX1	17q21.32	-0.454827	4.36243e-20
PRRC2A	6p21.33	-0.454888	4.3068e-20
SLC39A6	18q12.2	-0.455474	3.80537e-20
SMARCAL1	2q35	-0.456509	3.05657e-20
GTF2IRD1	7q11.23	-0.456547	3.03223e-20
TBX4	17q23.2	-0.45662	2.98583e-20
ITGA2	5q11.2	-0.456792	2.87864e-20
UBE2Z	17q21.32	-0.456943	2.78767e-20
BZW2	7p21.1	-0.456945	2.78651e-20
XPO5	6p21.1	-0.459317	1.68054e-20
CNOT6	5q35.3	-0.459351	1.66844e-20
DROSHA	5p13.3	-0.459611	1.57794e-20
PYGO2	1q21.3	-0.459969	1.46158e-20
EPHB2	1p36.12	-0.459993	1.45411e-20
RBMX	Xq26.3	-0.461905	9.63635e-21
HCG18	6p22.1	-0.462731	8.06067e-21
ASXL1	20q11.21	-0.463036	7.5447e-21
G6PD	Xq28	-0.46413	5.95063e-21
PHF21A	11p11.2	-0.465303	4.60847e-21
CPSF6	12q15	-0.465498	4.41622e-21
CAMSAP2	1q32.1	-0.466097	3.87421e-21
FAM189B	1q22	-0.468172	2.45627e-21
CCDC93	2q14.1	-0.468288	2.39435e-21
FBXL19	16p11.2	-0.469082	2.00967e-21
MPP3	17q21.31	-0.470613	1.43162e-21
MAFG	17q25.3	-0.471159	1.268e-21
SMPD4	2q21.1	-0.471674	1.13049e-21
CCDC97	19q13.2	-0.471781	1.10396e-21
SMYD5	2p13.2	-0.472054	1.03866e-21
GGA3	17q25.1	-0.474088	6.5873e-22
DNMT3A	2p23.3	-0.474716	5.71866e-22
MTA3	2p21	-0.476667	3.68091e-22
ANKRD52	12q13.3	-0.477052	3.37364e-22
NRF1	7q32.2	-0.477588	2.98654e-22
RACGAP1	12q13.12	-0.477889	2.78926e-22
NELFA	4p16.3	-0.478333	2.52098e-22
U2AF2	19q13.42	-0.479368	1.99072e-22
ANKRD27	19q13.11	-0.48232	1.01041e-22
ZSWIM5	1p34.1	-0.482686	9.28525e-23
ILF3	19p13.2	-0.486031	4.26851e-23
NUP62	19q13.33	-0.486307	4.00165e-23
SMARCC1	3p21.31	-0.486889	3.49243e-23
DHX9	1q25.3	-0.48811	2.62143e-23
MLLT6	17q12	-0.489257	2.00061e-23
CBX3	7p15.2	-0.489307	1.97703e-23
SINHCAF	12p11.21	-0.491069	1.30246e-23
CS	12q13.3	-0.491378	1.21026e-23
ARHGAP39	8q24.3	-0.49243	9.42169e-24
HEATR1	1q43	-0.494614	5.58401e-24
RNF44	5q35.2	-0.496061	3.94077e-24
ASIC1	12q13.12	-0.500491	1.34157e-24
HNRNPU	1q44	-0.50073	1.26511e-24
PLXNA1	3q21.3	-0.500804	1.24223e-24
DLG5	10q22.3	-0.501447	1.06081e-24
PPFIA4	1q32.1	-0.502682	7.82707e-25
CAD	2p23.3	-0.503259	6.78681e-25
TCOF1	5q32-q33.1	-0.506642	2.92658e-25
SPATS2	12q13.12	-0.514159	4.36432e-26
TEAD2	19q13.33	-0.516041	2.69011e-26
COPS7B	2q37.1	-0.516922	2.14227e-26
FAM49B	8q24.21	-0.518364	1.47432e-26
JARID2	6p22.3	-0.518839	1.30286e-26
EHMT2	6p21.33	-0.519998	9.63059e-27
LAMC1	1q25.3	-0.52345	3.88662e-27
SLC7A6	16q22.1	-0.528266	1.07715e-27
HMGA1	6p21.31	-0.531071	5.05396e-28
SRC	20q11.23	-0.53356	2.56688e-28
DVL2	17p13.1	-0.541082	3.1997e-29
UBAP2L	1q21.3	-0.555589	4.9597e-31
TCF3	19p13.3	-0.575987	9.90609e-34

## Sheet: Venn Diagram
Supplementary Table 4
Genes correlated to ALDOA and FBP1 expression of LIHC in the TCGA (PanCancer Atlas dataset).
Overlapped Gene
PNCK
AACS
PNMA1
TKT
SLC7A6
BRIX1
DTNBP1
CCNB1
BAK1
LHFPL2
SHC1
LMNB2
KPNA2
SLC6A10P
TRAF5
BIRC5
FOXJ1
ARHGAP39
STK17A
NAT8L
TPM3
PRR19
DNM1
LINC01011
PLXNA1
TONSL
ORC1
SH2B2
RAB35
NPM1
PACC1
NCDN
MAPRE1
FAAP24
PSMC3IP
DYNC1H1
WDR62
SAPCD2
CCR3
CIP2A
MAD2L1
YWHAZ
AURKB
CEP131
KCTD10
PITX1
PAFAH1B3
FHDC1
ASAP1
SCRN1
AP4M1
KIF4A
EPS8L3
CORO1C
SPP1
CA9
ENO2
KMT5A
MCM10
CLIP2
KDELR1
FAM72D
E2F4
TRAIP
CDK4
PRMT1
CDK16
DRP2
SLC7A11
TMEM132A
PSRC1
CLIC1
FAM104A
MMP1
CBX2
MMP12
CDCA5
TRIM16
PIFO
UBE2T
SLC2A1
STK39
GOLGA2P7
NAP1L1
FBRS
DNAJB13
SOGA1
NKAIN1
U2AF2
MTFR2
XPO6
ZDHHC7
PCLAF
PYGB
TACC3
ATP13A2
IQCE
CASC15
ARHGAP1
CCNB2
CDT1
GPRIN1
SMARCA4
ARMC9
LRP8
NFE2L3
CEP55
SH3D21
PLEKHB2
TRIM11
G6PD
TNFRSF21
SLC6A8
CDC45
STIP1
CCT3
MTHFD1L
PPP1R9B
IST1
TRIM28
BZW2
MPV17
POP1
RNF24
SRC
MED15
CANT1
SGSH
UBE2Z
RNPS1
MAFG
CBX3
VASP
EME1
SLC39A10
CDCA2
MARCKSL1
DAGLA
SLC7A1
GCNT3
C15ORF39
HILPDA
CCNF
PPM1G
ABCC1
GDF1
POLD1
CNOT3
PFKFB4
DKKL1
GYG1
TLCD5
HMGXB3
SLC39A1
STX6
LIMK1
MMP10
ATXN2L
LPCAT1
ANKS3
AAK1
CCT6A
TCOF1
CKAP4
UCK2
PLXNA3
DNASE1
RAB42
UTP4
SVBP
MAFG-DT
HOMER3
FHL3
TPD52L2
SOX4
SMARCD1
MCRS1
KIAA1522
SFPQ
ILF2
NUP93
RALY
C4ORF48
DBNDD2
PLK1
UBE2I
TEX19
MRGBP
GNPDA1
YEATS2
CCDC137
FAM72B
PTHLH
CCT2
TTLL1
CENPH
SUPT5H
RNF145
CTSV
ARHGEF2
EFTUD2
CS
PRMT2
INTS8
TMEM44
SLC1A5
PRKCD
MYBL2
SMYD5
RBM19
ENAH
RCC2
CENPO
DLX4
TUBA1B
RCOR2
C6ORF223
TEAD2
RHNO1
ZBTB45
GMIP
SMOX
VLDLR
FER1L4
PHF19
ETV4
STARD3NL
MPZL1
IFNGR2
KIF2C
CYTH2
DRAM1
PPP2R2C
MFSD10
CDK5R2
BLOC1S3
CENPA
DHX37
CDC20
DHX34
QPCT
H2AFZ
H2AFX
TYRO3
CEP89
SPATS2
FBXL19
SKA1
TRIP13
C10ORF91
RAN
C11ORF49
SPINDOC
C4ORF47
ZNF213
P3H4
DLL3
MFSD2B
MOB3A
SNHG3
GIT1
CLSTN1
SHCBP1
TAF6
CBFB
TMEM51
VPS37C
MARCKS
STX1A
CDCA3
PIMREG
NOP56
XPNPEP1
CERS5
UBE2C
GTPBP4
SERPINB1
RALA
DDN
EEF1E1
MDK
NCBP2
MRPS23
TRIM54
PIP4P2
FANCI
RAD54L
EDC4
PIGS
ASNS
SPC25
IKBKE
DBN1
PKMYT1
JPT2
GOLGA2P10
RIT1
PKN1
RHBDF2
TMEM201
MTMR2
GPC2
RRP12
CYREN
SLC41A3
MPP3
CIZ1
RAD51
MMD
PKM
ETV5
CACYBP
GPD2
CHAF1B
CCT5
ARF3
TLCD3A
SNRPB
ORC6
SOX11
SF3B4
SAE1
MFSD5
STRN4
LHFPL3-AS2
PPFIA4
ZNF385A
GAGE12D
KHDRBS1
NUP43
PVT1
MED22
LARP4B
NKX3-2
FMNL2
HMGA1
ATIC
SLC4A11
ATP1B3
NUP62
E2F3
NCAPG
SLC52A2
GGA2
USH1C
CENPM
NDRG3
WASF2
FAM49B
CDCA8
