# Supplementary material for: The role of fructose 1,6-bisphosphate-mediated glycolysis/gluconeogenesis genes in cancer prognosis
Source: Aging (Albany NY). 2022 Apr 11;14(7):3233–58. doi: 10.18632/aging.204010 (PMC9037270; doi:10.18632/aging.204010)
Supplement: Supplementary Table 5 [file aging-14-204010-s006.xlsx]

## Sheet: ALDOA correlated molecules
Supplementary Table 5. Genes correlated to ALDOA and FBP1 expression of LIHC in the TCGA (Firehose Legacy dataset).
Correlated Gene	Cytoband	Spearman's Correlation	p-Value
LCMT1	16p12.1	0.710529	1.34742e-56
ST6GALNAC4	9q34.11	0.685216	3.18485e-51
GAPDH	12p13.31	0.670876	2.04623e-48
SH3BGRL3	1p36.11	0.664424	3.33839e-47
UBE2I	16p13.3	0.657764	5.54446e-46
G6PD	Xq28	0.65528	1.55317e-45
LPCAT1	5p15.33	0.653249	3.57896e-45
ENO1	1p36.23	0.651119	8.53162e-45
MPV17	2p23.3	0.636259	3.02405e-42
SLC52A2	8q24.3	0.632399	1.3188e-41
PKM	15q23	0.627889	7.18088e-41
SLC16A3	17q25.3	0.618005	2.67626e-39
TUBA1C	12q13.12	0.617054	3.76425e-39
ZNF668	16p11.2	0.616087	5.32153e-39
ARPC1B	7q22.1	0.615618	6.29e-39
MAP7D1	1p34.3	0.611608	2.60006e-38
DCTN5	16p12.2	0.609986	4.59117e-38
MVP	16p11.2	0.609858	4.80082e-38
ATP6V1F	7q32.1	0.609713	5.05069e-38
NCDN	1p34.3	0.609271	5.89227e-38
LIMK1	7q11.23	0.608552	7.56667e-38
BAK1	6p21.31	0.604022	3.60901e-37
GIT1	17q11.2	0.602957	5.19141e-37
BOLA2	16p11.2	0.60002	1.40533e-36
TTC39A	1p32.3	0.595764	5.84057e-36
XPO6	16p12.1	0.589598	4.4337e-35
S100A11	1q21.3	0.589242	4.97752e-35
G6PC3	17q21.31	0.588941	5.48973e-35
CD2BP2	16p11.2	0.586238	1.31411e-34
JPT1	17q25.1	0.585581	1.62281e-34
ATP13A2	1p36.13	0.583886	2.7906e-34
ELOVL1	1p34.2	0.5826	4.20126e-34
TBC1D10B	16p11.2	0.581232	6.47833e-34
PHLDA2	11p15.4	0.579406	1.15134e-33
CLIC1	6p21.33	0.579249	1.20965e-33
MFSD10	4p16.3	0.576525	2.83188e-33
SLC1A5	19q13.32	0.576048	3.28476e-33
CHMP4B	20q11.22	0.575672	3.6902e-33
AGTRAP	1p36.22	0.573905	6.37067e-33
IQCD	12q24.13	0.573544	7.12146e-33
MAPK3	16p11.2	0.571856	1.19507e-32
RABEP2	16p11.2	0.568338	3.48317e-32
FBXL19	16p11.2	0.564459	1.11676e-31
UQCRH	1p33	0.562943	1.7529e-31
CFL1	11q13.1	0.562148	2.21864e-31
CAPNS1	19q13.12	0.561712	2.52455e-31
ABCC1	16p13.11	0.561562	2.63851e-31
POLR3K	16p13.3	0.560748	3.35515e-31
GLA	Xq22.1	0.559641	4.64518e-31
VASP	19q13.32	0.558761	6.01193e-31
RAB5IF	20q11.23	0.555389	1.6035e-30
TMSB10	2p11.2	0.553592	2.69233e-30
GCNT3	15q22.2	0.552871	3.31194e-30
ANXA5	4q27	0.552536	3.64563e-30
UBE2M	19q13.43	0.552254	3.95243e-30
CYTOR	2p11.2	0.551371	5.08707e-30
METTL9	16p12.2	0.549797	7.96313e-30
CD63	12q13.2	0.549712	8.15671e-30
TMEM147	19q13.12	0.549365	9.00027e-30
PLEKHB2	2q21.1	0.54866	1.09887e-29
PSMD14	2q24.2	0.548312	1.21236e-29
TRPM2	21q22.3	0.547833	1.38816e-29
GNPDA1	5q31.3	0.547563	1.4976e-29
ZNF213	16p13.3	0.547161	1.6775e-29
ATP1B3	3q23	0.544406	3.62849e-29
LY96	8q21.11	0.541851	7.3741e-29
ADGRE5	19p13.12	0.54144	8.26186e-29
GTF3C6	6q21	0.541302	8.58347e-29
CORO7	16p13.3	0.541181	8.87327e-29
FUNDC2	Xq28	0.538835	1.69048e-28
UBE2S	19q13.42	0.53878	1.71626e-28
SMG9	19q13.31	0.536532	3.16707e-28
GYG1	3q24	0.536351	3.32664e-28
ZDHHC7	16q24.1	0.535922	3.73736e-28
CDK16	Xp11.3	0.534705	5.19347e-28
HDDC2	6q22.31	0.534263	5.85161e-28
ARHGAP22	10q11.22-q11.23	0.533496	7.19286e-28
SLC2A1	1p34.2	0.532341	9.80677e-28
ATP6V0B	1p34.1	0.531696	1.16513e-27
PFKP	10p15.2	0.530802	1.47911e-27
DCTPP1	16p11.2	0.530428	1.63387e-27
IFI27L2	14q32.12	0.529476	2.10414e-27
PPT1	1p34.2	0.528638	2.62742e-27
RNPS1	16p13.3	0.527366	3.67484e-27
PPIH	1p34.2	0.526403	4.73388e-27
RCC2	1p36.13	0.52628	4.89026e-27
PLIN3	19p13.3	0.526088	5.14261e-27
NXPH4	12q13.3	0.525044	6.7594e-27
BSG	19p13.3	0.525033	6.77921e-27
TEAD2	19q13.33	0.524996	6.84469e-27
PMM2	16p13.2	0.524412	7.97067e-27
SPP1	4q22.1	0.524237	8.34482e-27
GPI	19q13.11	0.521234	1.81823e-26
UPP1	7p12.3	0.520114	2.4266e-26
DLGAP4	20q11.23	0.51947	2.86295e-26
GLTP	12q24.11	0.519447	2.87962e-26
PLAUR	19q13.31	0.518778	3.41796e-26
MIR4435-2HG	2q13	0.518657	3.5263e-26
SRM	1p36.22	0.517031	5.33934e-26
UQCRHL	1p36.21	0.51692	5.49247e-26
RHOG	11p15.4	0.516364	6.3264e-26
OAZ1	19p13.3	0.514323	1.06034e-25
LGALS9	17q11.2	0.514224	1.08737e-25
TOMM40	19q13.32	0.514211	1.0909e-25
EIPR1	2p25.3	0.514205	1.09259e-25
RGS2	1q31.2	0.513928	1.17153e-25
RELT	11q13.4	0.513888	1.18328e-25
CHST12	7p22.3	0.51322	1.39994e-25
STX4	16p11.2	0.512797	1.5568e-25
UAP1L1	9q34.3	0.512352	1.74083e-25
TRAPPC4	11q23.3	0.511995	1.90341e-25
RAN	12q24.33	0.511913	1.94291e-25
ADPRHL2	1p34.3	0.511608	2.09696e-25
YKT6	7p13	0.511245	2.29584e-25
H2AFY	5q31.1	0.509674	3.39524e-25
TUBA1B	12q13.12	0.508582	4.45122e-25
AACS	12q24.31	0.50814	4.96562e-25
ENO2	12p13.31	0.50805	5.07732e-25
CCDC88B	11q13.1	0.507002	6.57525e-25
TPD52L2	20q13.33	0.505725	8.99945e-25
SLC35E4	22q12.2	0.505663	9.13612e-25
PDLIM7	5q35.3	0.505551	9.39072e-25
CREB3	9p13.3	0.505524	9.45248e-25
PPP2R1A	19q13.41	0.505498	9.51344e-25
DCTN2	12q13.3	0.505299	9.98882e-25
SLC6A8	Xq28	0.504799	1.12886e-24
FKBP1A	20p13	0.504699	1.15695e-24
MFSD5	12q13.13	0.504131	1.32877e-24
SLC25A6	Xp22.33 and Yp11.2	0.503873	1.41503e-24
ANXA2	15q22.2	0.503408	1.585e-24
FCHO1	19p13.11	0.502972	1.76204e-24
CIAPIN1	16q21	0.502828	1.8249e-24
MTHFD1L	6q25.1	0.502001	2.23047e-24
RAP1GAP	1p36.12	0.501908	2.28091e-24
PELO	5q11.2	0.501235	2.68419e-24
NT5C3A	7p14.3	0.50123	2.68736e-24
ATP6V0C	16p13.3	0.501068	2.79479e-24
KNOP1	16p12.3	0.501005	2.83764e-24
HK2	2p12	0.499667	3.91633e-24
CARD19	9q22.31	0.499466	4.11024e-24
MOB3A	19p13.3	0.498303	5.43274e-24
PPP1R14B	11q13.1	0.49596	9.49629e-24
NUTF2	16q22.1	0.49582	9.81581e-24
RAB6B	3q22.1	0.495438	1.07466e-23
CCT5	5p15.2	0.49503	1.18397e-23
FCGR1B	1p11.2	0.494946	1.20766e-23
C5ORF30	5q21.1	0.494378	1.38118e-23
SELENOM	22q12.2	0.493978	1.51812e-23
PRMT1	19q13.33	0.493217	1.81594e-23
TREM2	6p21.1	0.492919	1.94795e-23
PYCARD	16p11.2	0.49265	2.07507e-23
C4ORF48	4p16.3	0.492299	2.25334e-23
SMYD5	2p13.2	0.492022	2.40456e-23
FTSJ1	Xp11.23	0.491187	2.92353e-23
GBGT1	9q34.2	0.490298	3.59782e-23
KCNF1	2p25.1	0.490159	3.71636e-23
BLVRA	7p13	0.489778	4.0603e-23
HMGA1	6p21.31	0.489655	4.17885e-23
MPZL1	1q24.2	0.489602	4.23066e-23
TMEM165	4q12	0.489343	4.49291e-23
VOPP1	7p11.2	0.489266	4.57444e-23
YBX1	1p34.2	0.489209	4.63496e-23
CTSC	11q14.2	0.489172	4.675e-23
IMPDH1	7q32.1	0.489056	4.80286e-23
PGD	1p36.22	0.488937	4.93689e-23
MAP1LC3B	16q24.2	0.488419	5.56717e-23
DYNLL1	12q24.31	0.488172	5.89508e-23
RENBP	Xq28	0.488099	5.99522e-23
FCGR1A	1q21.2	0.487985	6.15514e-23
BCAR1	16q23.1	0.486563	8.54674e-23
IL4I1	19q13.33	0.486376	8.92206e-23
ANKRD13D	11q13.2	0.485692	1.044e-22
FHDC1	4q31.3	0.485635	1.05771e-22
MRPS12	19q13.2	0.485545	1.07982e-22
PNCK	Xq28	0.484807	1.27898e-22
HOMER3	19p13.11	0.482887	1.98197e-22
GMIP	19p13.11	0.482166	2.33506e-22
DGKG	3q27.2-q27.3	0.482148	2.34419e-22
MICAL1	6q21	0.482124	2.35697e-22
PTDSS2	11p15.5	0.481584	2.66429e-22
SLC10A3	Xq28	0.481494	2.719e-22
TSC22D4	7q22.1	0.481464	2.73727e-22
LSP1P5	1q21.1	0.480642	3.29637e-22
JMJD6	17q25.1	0.480385	3.4936e-22
GPR84	12q13.13	0.480037	3.77857e-22
LRP8	1p32.3	0.479978	3.82919e-22
NUDT1	7p22.3	0.479852	3.93974e-22
FCGR1CP	1q21.1	0.479141	4.62285e-22
MAPRE1	20q11.21	0.479038	4.73077e-22
C15ORF39	15q24.2	0.478496	5.34254e-22
SNRPD2	19q13.32	0.478335	5.5392e-22
TPRN	9q34.3	0.478071	5.87649e-22
PPIA	7p13	0.477432	6.77918e-22
PRR7	5q35.3	0.477333	6.93057e-22
H2AFZ	4q23	0.477156	7.21098e-22
PFDN1	5q31.3	0.476287	8.75244e-22
ATG9B	7q36.1	0.47594	9.45469e-22
RUNDC3A	17q21.31	0.47584	9.66588e-22
UBE2MP1	16p11.2	0.47411	1.41841e-21
RHOC	1p13.2	0.473191	1.7373e-21
TMC6	17q25.3	0.47263	1.96553e-21
IKBKE	1q32.1	0.472497	2.02397e-21
ARPC2	2q35	0.471933	2.2909e-21
PIP4P2	8q21.3	0.471771	2.37393e-21
METRNL	17q25.3	0.471294	2.63543e-21
YARS	1p35.1	0.470881	2.88474e-21
S100A6	1q21.3	0.470609	3.06119e-21
RPUSD1	16p13.3	0.470194	3.35179e-21
USB1	16q21	0.470172	3.36763e-21
FAM27C	9q13	0.4698	3.65188e-21
LAT2	7q11.23	0.469482	3.91453e-21
ATP6V1E1	22q11.21	0.469395	3.98933e-21
UCHL1	4p13	0.46892	4.42268e-21
SLC7A7	14q11.2	0.468845	4.49596e-21
MLST8	16p13.3	0.468833	4.50753e-21
TPI1	12p13.31	0.468394	4.95766e-21
BABAM2	2p23.2	0.467804	5.63474e-21
DBNDD2	20q13.12	0.467437	6.09974e-21
RBM38	20q13.31	0.467313	6.26542e-21
TNFRSF18	1p36.33	0.467085	6.58118e-21
CHST11	12q23.3	0.466838	6.94272e-21
TAGLN2	1q23.2	0.466137	8.07403e-21
SNRPA	19q13.2	0.466111	8.12021e-21
NUP93	16q13	0.465806	8.67107e-21
P2RY6	11q13.4	0.465136	1.00134e-20
IFI30	19p13.11	0.464995	1.03214e-20
STIP1	11q13.1	0.464942	1.04394e-20
SYNGR3	16p13.3	0.464832	1.06865e-20
DUSP13	10q22.2	0.464807	1.07461e-20
TUBB3	16q24.3	0.464762	1.08496e-20
NABP2	12q13.3	0.46466	1.1089e-20
RTCA	1p21.2	0.464547	1.13605e-20
RAB3IL1	11q12.2-q12.3	0.464247	1.21151e-20
MBOAT7	19q13.42	0.464188	1.22687e-20
PSMD2	3q27.1	0.464132	1.24147e-20
ZCCHC17	1p35.2	0.464114	1.24626e-20
LHFPL2	5q14.1	0.462782	1.65619e-20
ARF3	12q13.12	0.462643	1.70571e-20
DDOST	1p36.12	0.462241	1.85808e-20
S100A9	1q21.3	0.462067	1.92822e-20
LPCAT4	15q14	0.462028	1.94408e-20
MICOS10	1p36.13	0.461466	2.19046e-20
ARL2	11q13.1	0.461083	2.37561e-20
GTF3C1	16p12.1	0.460681	2.58683e-20
TLCD3A	17p13.3	0.460611	2.62492e-20
STK32C	10q26.3	0.460128	2.90743e-20
GNA15	19p13.3	0.460009	2.98094e-20
GLRX3	10q26.3	0.459956	3.01445e-20
BRSK1	19q13.42	0.459728	3.16335e-20
ARPC4	3p25.3	0.459707	3.17729e-20
MRPL17	11p15.4	0.459454	3.35115e-20
PUSL1	1p36.33	0.459443	3.35915e-20
HILPDA	7q32.1	0.459096	3.61366e-20
RNF24	20p13	0.458687	3.93766e-20
ARPC3	12q24.11	0.458643	3.974e-20
E2F4	16q22.1	0.45861	4.00222e-20
LINC00239	14q32.31	0.458455	4.13423e-20
PLXNA1	3q21.3	0.457997	4.551e-20
NOMO1	16p13.11	0.457606	4.93993e-20
ATG7	3p25.3	0.457566	4.98186e-20
RCOR2	11q13.1	0.457438	5.11673e-20
RGS19	20q13.33	0.457164	5.41833e-20
RIN1	11q13.2	0.457164	5.41862e-20
HAGHL	16p13.3	0.457037	5.56384e-20
TMEM51	1p36.21	0.45635	6.42131e-20
LGALS3BP	17q25.3	0.456286	6.50831e-20
TNFSF12-TNFSF13	17p13.1	0.455971	6.94895e-20
CHMP3	2p11.2	0.455498	7.66833e-20
BCAT1	12p12.1	0.455497	7.66981e-20
SYNGR2	17q25.3	0.455374	7.86833e-20
KIF2C	1p34.1	0.455043	8.42851e-20
TNFSF9	19p13.3	0.454881	8.71705e-20
PRAF2	Xp11.23	0.454095	1.02589e-19
YWHAZ	8q22.3	0.454088	1.02737e-19
EGLN3	14q13.1	0.453693	1.11489e-19
CA9	9p13.3	0.453421	1.17927e-19
CASP4	11q22.3	0.453283	1.21334e-19
EMILIN2	18p11.32-p11.31	0.453252	1.22103e-19
PGP	16p13.3	0.453181	1.23898e-19
CALB2	16q22.2	0.452433	1.44559e-19
PHPT1	9q34.3	0.452433	1.44567e-19
RGS10	10q26.11	0.452162	1.52858e-19
SPNS1	16p11.2	0.452106	1.54606e-19
ORAI2	7q22.1	0.452052	1.56332e-19
MMP9	20q13.12	0.451619	1.70897e-19
CTDNEP1	17p13.1	0.451447	1.77011e-19
NAGK	2p13.3	0.451403	1.78634e-19
RCC1	1p35.3	0.451265	1.8374e-19
C2ORF27A	2q21.2	0.451046	1.92192e-19
SHCBP1	16q11.2	0.450905	1.97841e-19
CMTM7	3p22.3	0.450732	2.04963e-19
SMOX	20p13	0.449746	2.50716e-19
CDCP1	3p21.31	0.449598	2.58394e-19
SLC7A1	13q12.3	0.449266	2.76484e-19
PDCL3	2q11.2	0.449156	2.82723e-19
PPP4C	16p11.2	0.449129	2.84281e-19
CCDC189	16p11.2	0.448836	3.01787e-19
TMC5	16p12.3	0.448488	3.23882e-19
SOWAHD	Xq24	0.448403	3.29509e-19
MBOAT4	8p12	0.448202	3.43238e-19
EZR	6q25.3	0.447122	4.27202e-19
TAP1	6p21.32	0.447095	4.29542e-19
C2ORF81	2p13.1	0.446895	4.47228e-19
RAB35	12q24.23	0.446696	4.65581e-19
KLC2	11q13.2	0.446326	5.0172e-19
ADAM12	10q26.2	0.446112	5.23854e-19
RALY	20q11.22	0.446056	5.29797e-19
B4GALNT1	12q13.3	0.445822	5.55376e-19
FCER1G	1q23.3	0.445577	5.83406e-19
FLOT1	6p21.33	0.445424	6.01677e-19
PSMB2	1p34.3	0.445262	6.2157e-19
PWWP2B	10q26.3	0.445178	6.32134e-19
EVA1B	1p34.3	0.44479	6.83446e-19
TUBA4A	2q35	0.444753	6.88438e-19
PKMYT1	16p13.3	0.444736	6.90823e-19
RASGEF1A	10q11.21	0.444525	7.20786e-19
PSENEN	19q13.12	0.44442	7.36075e-19
FLOT2	17q11.2	0.444409	7.3767e-19
NTNG2	9q34.13	0.444031	7.95691e-19
S100P	4p16.1	0.443748	8.42113e-19
MAP1LC3B2	12q24.22	0.443728	8.45486e-19
CARD9	9q34.3	0.443656	8.57751e-19
SMARCD3	7q36.1	0.443645	8.59561e-19
SLC9A1	1p36.11	0.443538	8.78189e-19
LIF	22q12.2	0.443459	8.92203e-19
S100A2	1q21.3	0.443236	9.3287e-19
EFNA5	5q21.3	0.442951	9.8734e-19
VPS4A	16q22.1	0.442729	1.03196e-18
PLP2	Xp11.23	0.442666	1.04517e-18
BACE2	21q22.2-q22.3	0.442641	1.05043e-18
BRMS1	11q13.2	0.442412	1.09927e-18
FABP6	5q33.3	0.442388	1.10465e-18
DDA1	19p13.11	0.442201	1.14652e-18
PHC2	1p35.1	0.44209	1.17203e-18
MUC12	7q22.1	0.441996	1.19432e-18
PRMT2	21q22.3	0.441738	1.25701e-18
MYLK2	20q11.21	0.441713	1.2633e-18
NDUFA4L2	12q13.3	0.441669	1.27447e-18
AXIN1	16p13.3	0.441661	1.27636e-18
NME2	17q21.33	0.441622	1.28644e-18
PPFIA4	1q32.1	0.44145	1.33113e-18
PAFAH1B3	19q13.2	0.440872	1.4928e-18
ZNF580	19q13.42	0.440596	1.57649e-18
SPATA12	3p14.3	0.440537	1.59495e-18
PFDN4	20q13.2	0.440448	1.62331e-18
WDR54	2p13.1	0.440446	1.62422e-18
RTL8A	Xq26.3	0.440349	1.65559e-18
TEAD4	12p13.33	0.440268	1.68225e-18
MCUB	4q25	0.440147	1.72311e-18
PGK1	Xq21.1	0.439513	1.95258e-18
IDH3G	Xq28	0.439351	2.01608e-18
CD68	17p13.1	0.439336	2.02191e-18
DUSP4	8p12	0.439156	2.09524e-18
FAM131C	1p36.13	0.438728	2.27921e-18
UBE2L3	22q11.21	0.43815	2.55362e-18
TSPO	22q13.2	0.438069	2.59456e-18
LAMTOR5	1p13.3	0.437983	2.63881e-18
GNG5	1p22.3	0.437869	2.69805e-18
SEC61A1	3q21.3	0.437516	2.89176e-18
RPP25	15q24.2	0.437418	2.94792e-18
TRIM47	17q25.1	0.437129	3.1193e-18
GSK3A	19q13.2	0.436832	3.30608e-18
HAVCR2	5q33.3	0.436823	3.3119e-18
TYROBP	19q13.12	0.436566	3.48243e-18
SEC61G	7p11.2	0.436518	3.5153e-18
CAP1	1p34.2	0.43648	3.54099e-18
EMC8	16q24.1	0.436027	3.86856e-18
KTI12	1p32.3	0.43587	3.9887e-18
RTL8C	Xq26.3	0.435687	4.13336e-18
SOX11	2p25.2	0.435556	4.24045e-18
MAPKAPK2	1q32.1	0.43495	4.77062e-18
CCL26	7q11.23	0.434877	4.83879e-18
COPS9	2q37.3	0.434727	4.98152e-18
AP4M1	7q22.1	0.434444	5.26238e-18
UBALD2	17q25.1	0.434358	5.35159e-18
TM4SF1	3q25.1	0.433975	5.76309e-18
RAC1	7p22.1	0.433421	6.41535e-18
PPME1	11q13.4	0.432694	7.38222e-18
AKR1B1	7q33	0.432666	7.42223e-18
RHOF	12q24.31	0.432534	7.61404e-18
CDK5R2	2q35	0.432511	7.64745e-18
CEP89	19q13.11	0.432281	7.99425e-18
GOLM1	9q21.33	0.432006	8.42873e-18
SH3D21	1p34.3	0.432004	8.43123e-18
SH2D2A	1q23.1	0.431309	9.63727e-18
C3ORF52	3q13.2	0.431213	9.81584e-18
SARNP	12q13.2	0.431167	9.90254e-18
CLTA	9p13.3	0.431121	9.99088e-18
RABL6	9q34.3	0.431055	1.01174e-17
TMEM234	1p35.2	0.431041	1.01448e-17
LAGE3	Xq28	0.43096	1.03047e-17
SEL1L3	4p15.2	0.43094	1.03444e-17
CHMP1A	16q24.3	0.430716	1.07971e-17
LLPH	12q14.3	0.43035	1.1582e-17
HSBP1	16q23.3	0.430077	1.2202e-17
MCRS1	12q13.12	0.429655	1.32253e-17
EMP3	19q13.33	0.428924	1.52039e-17
SPOCD1	1p35.2	0.42856	1.62944e-17
KARS	16q23.1	0.428528	1.63935e-17
UTP11	1p34.3	0.4285	1.6482e-17
MTFP1	22q12.2	0.428493	1.65054e-17
LAMTOR1	11q13.4	0.428461	1.66041e-17
ORC6	16q11.2	0.428356	1.69386e-17
COL9A2	1p34.2	0.428228	1.73568e-17
TACC3	4p16.3	0.428149	1.76193e-17
MARCKSL1	1p35.1	0.428047	1.79625e-17
DRAM2	1p13.3	0.428008	1.80973e-17
KIAA1324	1p13.3	0.427799	1.88308e-17
GRAMD1A	19q13.11	0.427777	1.89082e-17
PHKG2	16p11.2	0.427705	1.91673e-17
SYT13	11p11.2	0.427324	2.06042e-17
COLGALT1	19p13.11	0.42732	2.06186e-17
PIK3R6	17p13.1	0.427301	2.06933e-17
TKT	3p21.1	0.427171	2.12094e-17
CCT6A	7p11.2	0.427072	2.16117e-17
S100A4	1q21.3	0.426986	2.1966e-17
CKLF	16q21	0.42698	2.19916e-17
PKIB	6q22.31	0.426898	2.23346e-17
B3GNTL1	17q25.3	0.426872	2.24457e-17
TBXAS1	7q34	0.426857	2.2508e-17
FZD2	17q21.31	0.425921	2.68575e-17
PSMD7	16q23.1	0.425905	2.69431e-17
FBRS	16p11.2	0.425595	2.85608e-17
LMNB2	19p13.3	0.425559	2.87551e-17
SEPTIN9	17q25.3	0.425514	2.89999e-17
SPI1	11p11.2	0.42526	3.04177e-17
ATAD3B	1p36.33	0.425165	3.09671e-17
LAPTM5	1p35.2	0.424829	3.29903e-17
PTGES	9q34.11	0.42452	3.49597e-17
C12ORF49	12q24.22	0.424445	3.54531e-17
PLEKHO1	1q21.2	0.423642	4.12117e-17
DDX39A	19p13.12	0.423556	4.18775e-17
PRR19	19q13.2	0.423552	4.19118e-17
NFKBIE	6p21.1	0.423347	4.35517e-17
CDC20	1p34.2	0.423276	4.4128e-17
TREM1	6p21.1	0.423184	4.48987e-17
BLOC1S4	4p16.1	0.423029	4.62121e-17
SELENOW	19q13.33	0.422509	5.09193e-17
FA2H	16q23.1	0.422453	5.14568e-17
SLC38A1	12q13.11	0.422421	5.1766e-17
YWHAB	20q13.12	0.422332	5.26291e-17
STRA6	15q24.1	0.422275	5.31962e-17
MAF1	8q24.3	0.421914	5.68909e-17
NRGN	11q24.2	0.421817	5.79291e-17
RSL1D1	16p13.13	0.421713	5.90566e-17
SZRD1	1p36.13	0.421435	6.21943e-17
FUNDC1	Xp11.3	0.421257	6.42813e-17
GARS	7p14.3	0.421152	6.55488e-17
TESC	12q24.22	0.421124	6.58813e-17
LSM10	1p34.3	0.4209	6.868e-17
IL15RA	10p15.1	0.420874	6.9015e-17
TAX1BP3	17p13.2	0.420808	6.98626e-17
BIRC7	20q13.33	0.420797	7.00021e-17
NKAIN1	1p35.2	0.420746	7.06675e-17
MRPS34	16p13.3	0.420643	7.20301e-17
PTGS1	9q33.2	0.42057	7.30114e-17
RPS2	16p13.3	0.420555	7.32134e-17
GAL3ST4	7q22.1	0.420366	7.58179e-17
CLTB	5q35.2	0.420231	7.77364e-17
CCDC136	7q32.1	0.419919	8.23532e-17
ARHGAP4	Xq28	0.419826	8.37903e-17
CDKN2D	19p13.2	0.419824	8.38182e-17
PRR13	12q13.13	0.419706	8.56703e-17
HDAC7	12q13.11	0.419517	8.87007e-17
NCF4	22q12.3	0.419358	9.13453e-17
FAM50A	Xq28	0.418891	9.95586e-17
LEPROTL1	8p12	0.418868	9.99745e-17
TRAF2	9q34.3	0.41884	1.00497e-16
RNFT2	12q24.22	0.418707	1.02993e-16
CEP55	10q23.33	0.418516	1.06669e-16
ZNF385A	12q13.13	0.418345	1.10088e-16
SHKBP1	19q13.2	0.418321	1.10568e-16
AGR2	7p21.1	0.418096	1.15249e-16
REEP4	8p21.3	0.418088	1.15406e-16
GAD1	2q31.1	0.4178	1.2168e-16
SNCG	10q23.2	0.417741	1.23002e-16
LPAR2	19p13.11	0.417558	1.27204e-16
NT5C	17q25.1	0.41743	1.30226e-16
CCDC124	19p13.11	0.417022	1.40324e-16
RAB38	11q14.2	0.416575	1.52266e-16
NOL3	16q22.1	0.416536	1.53357e-16
LAIR1	19q13.42	0.416271	1.60976e-16
TRIM46	1q22	0.416239	1.61914e-16
MAPKAPK5-AS1	12q24.12	0.416224	1.62373e-16
DPYSL4	10q26.3	0.416021	1.68485e-16
ACD	16q22.1	0.416013	1.68745e-16
DPM2	9q34.11	0.416004	1.69014e-16
PTP4A2	1p35.2	0.415722	1.77945e-16
APCDD1L	20q13.32	0.415717	1.78093e-16
ACTB	7p22.1	0.415557	1.83346e-16
CYBA	16q24.2	0.415434	1.87533e-16
ADORA3	1p13.2	0.415317	1.91552e-16
CCDC74A	2q21.1	0.415234	1.94454e-16
KDELR1	19q13.33	0.414502	2.22142e-16
DBN1	5q35.3	0.414159	2.36386e-16
DOK3	5q35.3	0.41382	2.51374e-16
TBCB	19q13.12	0.413797	2.52418e-16
ATG101	12q13.13	0.413558	2.63563e-16
LGALS1	22q13.1	0.413513	2.6573e-16
HRAS	11p15.5	0.413436	2.69478e-16
COA1	7p13	0.413375	2.72478e-16
IER5L	9q34.11	0.413245	2.78952e-16
KPNA2	17q24.2	0.413231	2.79666e-16
PAEP	9q34.3	0.412992	2.91982e-16
TREML3P	6p21.1	0.412877	2.98121e-16
TRIP10	19p13.3	0.412794	3.02606e-16
PIP5K1C	19p13.3	0.41245	3.21955e-16
CYCS	7p15.3	0.412425	3.23437e-16
GRIN2D	19q13.33	0.412407	3.24503e-16
PPP2R2C	4p16.1	0.412314	3.29961e-16
CKS2	9q22.2	0.411963	3.51532e-16
BUD31	7q22.1	0.411726	3.66803e-16
KMT5A	12q24.31	0.411532	3.798e-16
ARL14	3q25.33	0.411409	3.88294e-16
SMARCD1	12q13.12	0.411403	3.88714e-16
DYNLT1	6q25.3	0.411347	3.92656e-16
PLK1	16p12.2	0.411177	4.04877e-16
OSCAR	19q13.42	0.410904	4.25143e-16
SIRT6	19p13.3	0.41088	4.26963e-16
SLC6A6	3p25.1	0.410834	4.30503e-16
CERS5	12q13.12	0.410788	4.34091e-16
TNNT1	19q13.42	0.410617	4.47587e-16
B9D2	19q13.2	0.410358	4.68834e-16
PPP6R1	19q13.42	0.410337	4.70629e-16
FOCAD	9p21.3	0.410276	4.75814e-16
CCT7	2p13.2	0.410252	4.77877e-16
UBASH3B	11q24.1	0.410146	4.86979e-16
HSPBP1	19q13.42	0.409879	5.10838e-16
EIF3I	1p35.2	0.409701	5.2732e-16
PITX1	5q31.1	0.409681	5.29186e-16
ACTL8	1p36.13	0.409557	5.41023e-16
VDAC2	10q22.2	0.409453	5.51164e-16
RHOV	15q15.1	0.409443	5.52205e-16
RRAS	19q13.33	0.409311	5.65357e-16
TYRO3	15q15.1	0.409086	5.88454e-16
S100A3	1q21.3	0.409051	5.92149e-16
ANO9	11p15.5	0.408814	6.17658e-16
CD320	19p13.2	0.408801	6.19133e-16
SOCS1	16p13.13	0.408765	6.23084e-16
KIAA1522	1p35.1	0.408288	6.7829e-16
PAQR4	16p13.3	0.408235	6.8474e-16
BIRC5	17q25.3	0.408156	6.94385e-16
CCDC127	5p15.33	0.407782	7.42102e-16
LAMP5	20p12.2	0.407509	7.78916e-16
ETV5	3q27.2	0.407392	7.9524e-16
MAP3K6	1p36.11	0.407272	8.12312e-16
ARPC5L	9q33.3	0.407032	8.47618e-16
GRN	17q21.31	0.406791	8.84548e-16
RIPK2	8q21.3	0.406443	9.4059e-16
FCGBP	19q13.2	0.406329	9.59844e-16
DOK1	2p13.1	0.406296	9.65481e-16
TMCO4	1p36.13	0.406005	1.01626e-15
GTPBP4	10p15.3	0.405927	1.03042e-15
ASCL2	11p15.5	0.405735	1.06578e-15
PGAM1	10q24.1	0.405735	1.06588e-15
PACC1	1q32.3	0.405577	1.09596e-15
NBL1	1p36.13	0.405503	1.1103e-15
PYGB	20p11.21	0.404959	1.22189e-15
MFSD2B	2p23.3	0.404808	1.25464e-15
ACTR1A	10q24.32	0.404733	1.27136e-15
PTGES2	9q34.11	0.404616	1.2977e-15
PRR14	16p11.2	0.404085	1.42457e-15
CTXN1	19p13.2	0.403813	1.49392e-15
IFNGR2	21q22.11	0.403259	1.64614e-15
CTHRC1	8q22.3	0.403093	1.69457e-15
KIAA0930	22q13.31	0.403036	1.71155e-15
IL27RA	19p13.12	0.403028	1.71394e-15
DPCD	10q24.32	0.402979	1.72855e-15
NUDC	1p36.11	0.402888	1.75641e-15
SGPP2	2q36.1	0.402753	1.79807e-15
DGKZ	11p11.2	0.402674	1.823e-15
IER3	6p21.33	0.402656	1.8289e-15
ACOT9	Xp22.11	0.402482	1.88521e-15
RHOT2	16p13.3	0.402299	1.94618e-15
NDRG3	20q11.23	0.402163	1.99294e-15
PLXDC1	17q12	0.40216	1.9941e-15
ADGRB2	1p35.2	0.401966	2.06244e-15
ZG16B	16p13.3	0.401853	2.10365e-15
B3GNT3	19p13.11	0.401638	2.18364e-15
PSMD8	19q13.2	0.40146	2.25206e-15
HES4	1p36.33	0.401456	2.25388e-15
HLA-DMA	6p21.32	0.401455	2.25408e-15
MEAK7	16q24.1	0.401443	2.25871e-15
PSMG3	7p22.3	0.401373	2.28664e-15
TOR4A	9q34.3	0.401356	2.29339e-15
ANXA2P2	9p13.3	0.401327	2.305e-15
MRPL47	3q26.33	0.40132	2.30768e-15
CAPG	2p11.2	0.401093	2.40037e-15
WDR13	Xp11.23	0.400999	2.43968e-15
SYK	9q22.2	0.400541	2.64166e-15
PACS1	11q13.1-q13.2	0.400171	2.81631e-15
SERPINB6	6p25.2	0.39985	2.97669e-15
MILR1	17q23.3	0.399703	3.05331e-15
KXD1	19p13.11	0.399674	3.06877e-15
MUC13	3q21.2	0.399656	3.0786e-15
SMIM20	4p15.2	0.399655	3.07887e-15
TMEM158	3p21.31	0.399575	3.12175e-15
TMEM156	4p14	0.399491	3.16747e-15
NOMO3	16p13.11	0.399369	3.23483e-15
NOL12	22q13.1	0.399352	3.24418e-15
MRGBP	20q13.33	0.399321	3.26164e-15
FKBP10	17q21.2	0.399031	3.42894e-15
BCAN	1q23.1	0.398998	3.44863e-15
MYBL2	20q13.12	0.398845	3.54042e-15
TUBA1A	12q13.12	0.398515	3.7475e-15
TPM4	19p13.12-p13.11	0.398431	3.80211e-15
BCL2A1	15q25.1	0.398122	4.00925e-15
DTNBP1	6p22.3	0.398091	4.03094e-15
VDAC1	5q31.1	0.397909	4.15899e-15
EGF	4q25	0.397768	4.26046e-15
ADA	20q13.12	0.397708	4.30506e-15
FAM110A	20p13	0.397614	4.37495e-15
NFKB2	10q24.32	0.397478	4.47822e-15
PSMA5	1p13.3	0.39745	4.4992e-15
PLTP	20q13.12	0.397342	4.58367e-15
UCK2	1q24.1	0.397202	4.69508e-15
TRIP13	5p15.33	0.396998	4.86171e-15
MED27	9q34.13	0.39694	4.90988e-15
CHPF2	7q36.1	0.396569	5.23139e-15
MUC1	1q22	0.396083	5.68419e-15
GRAMD1B	11q24.1	0.39598	5.78486e-15
ATP13A1	19p13.11	0.395964	5.80135e-15
CD300A	17q25.1	0.3958	5.96544e-15
TNNI2	11p15.5	0.3958	5.9659e-15
EEF1E1	6p24.3	0.395764	6.00216e-15
PFN1	17p13.2	0.395685	6.08347e-15
SLC6A10P	16p11.2	0.395564	6.21011e-15
CCNE1	19q12	0.395475	6.30544e-15
CCNB1	5q13.2	0.394865	6.99403e-15
RPLP0P2	11q12.2	0.394812	7.05841e-15
PIGS	17q11.2	0.394478	7.46953e-15
COPZ1	12q13.13	0.394472	7.47671e-15
CHCHD3	7q32.3-q33	0.394262	7.74803e-15
PSMD13	11p15.5	0.394083	7.98677e-15
BATF3	1q32.3	0.393946	8.17406e-15
RBPJ	4p15.2	0.39386	8.29462e-15
CDH17	8q22.1	0.393659	8.58242e-15
PRRX2	9q34.11	0.393645	8.60278e-15
ZDHHC24	11q13.2	0.393495	8.82274e-15
ITGAM	16p11.2	0.393278	9.15297e-15
STK11IP	2q35	0.393244	9.2058e-15
NANS	9q22.33	0.393137	9.37316e-15
EFNA3	1q21.3	0.393	9.59272e-15
RAB42	1p35.3	0.392808	9.90851e-15
C16ORF91	16p13.3	0.392665	1.01513e-14
FIBCD1	9q34.12	0.392392	1.06298e-14
INO80E	16p11.2	0.392231	1.09205e-14
METTL1	12q14.1	0.392212	1.09556e-14
TRNAU1AP	1p35.3	0.391915	1.15188e-14
TNIP2	4p16.3	0.391872	1.16024e-14
RAB11FIP5	2p13.2	0.391729	1.18832e-14
BOLA3	2p13.1	0.391704	1.19347e-14
E2F2	1p36.12	0.391669	1.20051e-14
PRDX1	1p34.1	0.391492	1.23669e-14
KCNK12	2p16.3	0.39134	1.26862e-14
CCT2	12q15	0.391283	1.28089e-14
TANGO2	22q11.21	0.391197	1.29955e-14
CC2D1B	1p32.3	0.391141	1.31183e-14
MYCBP	1p34.3	0.391127	1.31484e-14
DCUN1D5	11q22.3	0.390996	1.34397e-14
PDZD11	Xq13.1	0.390897	1.36665e-14
CLSTN1	1p36.22	0.390818	1.3848e-14
RASAL1	12q24.13	0.390759	1.3985e-14
PNKP	19q13.33	0.390694	1.41375e-14
DAZAP1	19p13.3	0.390612	1.4335e-14
MSANTD3	9q31.1	0.390317	1.50595e-14
SLC25A39	17q21.31	0.390316	1.5062e-14
COTL1	16q24.1	0.390313	1.50698e-14
TMEM163	2q21.3	0.390245	1.52409e-14
SPINK13	5q32	0.390167	1.54421e-14
POP7	7q22.1	0.389848	1.62882e-14
VSIG10L	19q13.41	0.389804	1.64079e-14
TELO2	16p13.3	0.38972	1.66404e-14
HPSE	4q21.23	0.389712	1.66611e-14
TMEM132A	11q12.2	0.389687	1.67314e-14
TMEM121B	22q11.1	0.389345	1.77154e-14
SPHK1	17q25.1	0.389284	1.78953e-14
COMMD8	4p12	0.389182	1.82025e-14
SLC25A19	17q25.1	0.38909	1.84832e-14
SFT2D1	6q27	0.388932	1.89759e-14
TPM3	1q21.3	0.388181	2.15006e-14
TMEM50A	1p36.11	0.38804	2.20099e-14
SMS	Xp22.11	0.387794	2.293e-14
DNAJC5	20q13.33	0.387562	2.38289e-14
DTYMK	2q37.3	0.38746	2.42345e-14
NEIL3	4q34.3	0.387416	2.44114e-14
DNM1	9q34.11	0.387364	2.46228e-14
ELF4	Xq26.1	0.387252	2.50844e-14
TEDC2	16p13.3	0.38722	2.52183e-14
FBH1	10p15.1	0.387125	2.56144e-14
PTGFRN	1p13.1	0.386876	2.66938e-14
RAB31	18p11.22	0.386875	2.6696e-14
SRSF9	12q24.31	0.386718	2.73999e-14
JOSD2	19q13.33	0.386404	2.88602e-14
NRSN2	20p13	0.386383	2.89571e-14
PSMA7	20q13.33	0.386371	2.9015e-14
NIPSNAP2	7p11.2	0.386318	2.92711e-14
APOO	Xp22.11	0.386172	2.99854e-14
OLA1	2q31.1	0.386161	3.00389e-14
RRP12	10q24.1	0.386086	3.04133e-14
COL22A1	8q24.23-q24.3	0.386062	3.05365e-14
RHBDL2	1p34.3	0.386044	3.06255e-14
HSF1	8q24.3	0.385824	3.17562e-14
TNFRSF21	6p12.3	0.385822	3.17643e-14
TSPAN15	10q22.1	0.385794	3.19141e-14
BCL7C	16p11.2	0.385658	3.26388e-14
POLR2G	11q12.3	0.385551	3.32189e-14
HAPLN3	15q26.1	0.385309	3.45658e-14
NANOS3	19p13.12	0.385194	3.52243e-14
CBX2	17q25.3	0.385142	3.55308e-14
PTP4A3	8q24.3	0.385134	3.55774e-14
DNER	2q36.3	0.384963	3.65891e-14
STARD3NL	7p14.1	0.384935	3.6756e-14
OLFML2B	1q23.3	0.384929	3.67932e-14
RGS20	8q11.23	0.384912	3.68945e-14
ATXN2L	16p11.2	0.384903	3.69537e-14
FGD3	9q22.31	0.384829	3.74061e-14
CD300C	17q25.1	0.384812	3.75057e-14
HDAC1	1p35.2-p35.1	0.384689	3.82737e-14
NDUFS5	1p34.3	0.384621	3.87026e-14
TNFRSF4	1p36.33	0.384536	3.92438e-14
NPRL3	16p13.3	0.384382	4.02498e-14
TRIM28	19q13.43	0.384	4.28513e-14
PKP3	11p15.5	0.383956	4.31612e-14
NPTX1	17q25.3	0.383901	4.35494e-14
STX1A	7q11.23	0.383874	4.37466e-14
RNF145	5q33.3	0.383813	4.41796e-14
VPS37C	11q12.2	0.383657	4.53227e-14
PPM1G	2p23.3	0.383644	4.54181e-14
NME1	17q21.33	0.383333	4.77906e-14
RFXANK	19p13.11	0.383194	4.88852e-14
NDUFB3	2q33.1	0.383134	4.93722e-14
GSDMC	8q24.21	0.383114	4.95277e-14
ADAP2	17q11.2	0.383063	4.99435e-14
TRPV2	17p11.2	0.383047	5.00716e-14
AP5Z1	7p22.1	0.382936	5.09921e-14
OGFRL1	6q13	0.382931	5.10328e-14
COPE	19p13.11	0.382677	5.31901e-14
PIMREG	17p13.2	0.382543	5.43664e-14
PML	15q24.1	0.382378	5.58491e-14
C1ORF54	1q21.2	0.382313	5.64441e-14
ITGA3	17q21.33	0.381922	6.01437e-14
PTTG1	5q33.3	0.381581	6.35712e-14
ACPP	3q22.1	0.381579	6.35949e-14
ADAM15	1q21.3	0.381446	6.49886e-14
ABCF2	7q36.1	0.381437	6.5081e-14
OSBPL10	3p23	0.381289	6.66603e-14
NUP62	19q13.33	0.381268	6.68904e-14
CLIC3	9q34.3	0.381267	6.69008e-14
DGUOK	2p13.1	0.38117	6.79622e-14
STX6	1q25.3	0.381157	6.81013e-14
DDN	12q13.12	0.381044	6.93608e-14
STAC3	12q13.3	0.380966	7.02501e-14
SLC2A6	9q34.2	0.380953	7.03937e-14
STX3	11q12.1	0.380578	7.47986e-14
PPIAL4C	1q21.2	0.37974	8.56539e-14
FCGR2A	1q23.3	0.379661	8.67526e-14
UNC119	17q11.2	0.379558	8.81972e-14
SAE1	19q13.32	0.37943	9.00416e-14
UBXN11	1p36.11	0.379304	9.18856e-14
PSMC3IP	17q21.2	0.379209	9.33131e-14
RBCK1	20p13	0.379005	9.64171e-14
IL18	11q23.1	0.378997	9.65449e-14
CCDC74B	2q21.1	0.378911	9.78876e-14
DAB2	5p13.1	0.378867	9.85926e-14
TRNP1	1p36.11	0.378836	9.90835e-14
TIMP1	Xp11.3	0.378741	1.00612e-13
SAPCD2	9q34.3	0.378738	1.00662e-13
MICALL2	7p22.3	0.378636	1.0232e-13
JAK3	19p13.11	0.378603	1.02859e-13
PHF19	9q33.2	0.378565	1.03494e-13
ATAD3A	1p36.33	0.378462	1.05233e-13
ADAMTS14	10q22.1	0.378358	1.06994e-13
PPIAL4G	1q21.2	0.378323	1.07602e-13
EIF2S2	20q11.22	0.378222	1.09364e-13
PRPH	12q13.12	0.377991	1.13483e-13
KLF16	19p13.3	0.377753	1.17903e-13
TINAG	6p12.1	0.37751	1.22581e-13
TGFB1	19q13.2	0.377292	1.26936e-13
CCDC9	19q13.32	0.376865	1.35912e-13
FERMT3	11q13.1	0.376862	1.35979e-13
TPCN1	12q24.13	0.376842	1.36404e-13
PPP1R18	6p21.33	0.376719	1.39122e-13
POC5	5q13.3	0.376715	1.39202e-13
EIF3K	19q13.2	0.376703	1.39482e-13
EPO	7q22.1	0.376676	1.40082e-13
TNFAIP6	2q23.3	0.37648	1.44524e-13
STK17A	7p13	0.3764	1.46388e-13
PKD1L2	16q23.2	0.376391	1.46591e-13
SFXN3	10q24.31	0.376213	1.50829e-13
MCU	10q22.1	0.376018	1.55587e-13
MINDY4	7p14.3	0.376016	1.55632e-13
ORC1	1p32.3	0.37592	1.58029e-13
CYTH2	19q13.33	0.37588	1.59035e-13
RGS1	1q31.2	0.375828	1.6037e-13
HSPA6	1q23.3	0.375764	1.62007e-13
MMP12	11q22.2	0.375738	1.62669e-13
ZNF576	19q13.31	0.375734	1.62785e-13
SLC38A5	Xp11.23	0.37571	1.63392e-13
LRP10	14q11.2	0.37561	1.66015e-13
RIT1	1q22	0.37543	1.70838e-13
CENPM	22q13.2	0.375396	1.71763e-13
EID3	12q23.3	0.375322	1.73819e-13
SRPX2	Xq22.1	0.375173	1.77982e-13
EDC4	16q22.1	0.375167	1.78135e-13
FAM49B	8q24.21	0.375157	1.78426e-13
ZNF205	16p13.3	0.374835	1.87787e-13
APEX2	Xp11.21	0.374739	1.90659e-13
FHL3	1p34.3	0.374702	1.91799e-13
KCTD17	22q12.3	0.374643	1.93583e-13
DYNLRB1	20q11.22	0.374566	1.95974e-13
C7ORF61	7q22.1	0.374551	1.9645e-13
MED22	9q34.2	0.374546	1.96598e-13
CASC15	6p22.3	0.374491	1.98311e-13
TONSL	8q24.3	0.374474	1.98856e-13
GNB2	7q22.1	0.374317	2.0387e-13
AAK1	2p13.3	0.374266	2.05503e-13
SSNA1	9q34.3	0.374228	2.06738e-13
ITPA	20p13	0.374116	2.10442e-13
KY	3q22.2	0.374023	2.1357e-13
CRIP1	14q32.33	0.373992	2.14638e-13
LILRB4	19q13.42	0.373965	2.15531e-13
STK39	2q24.3	0.37391	2.17434e-13
MIF	22q11.23	0.373845	2.19683e-13
RSPH1	21q22.3	0.373641	2.26857e-13
CPNE7	16q24.3	0.373471	2.33038e-13
FLYWCH1	16p13.3	0.373439	2.34246e-13
FXYD5	19q13.12	0.373125	2.46141e-13
PGF	14q24.3	0.373083	2.47764e-13
RBM45	2q31.2	0.372986	2.51593e-13
GNB1	1p36.33	0.37294	2.53415e-13
LGALS3	14q22.3	0.372901	2.55003e-13
YPEL4	11q12.1	0.372871	2.56175e-13
NCKAP5L	12q13.12	0.372825	2.58065e-13
GLIPR2	9p13.3	0.372551	2.69451e-13
ANKRD22	10q23.31	0.37253	2.70338e-13
SPATC1L	21q22.3	0.372502	2.7151e-13
FOXK2	17q25.3	0.372392	2.76266e-13
BCAS4	20q13.13	0.372335	2.78771e-13
HSPA12A	10q25.3	0.372108	2.88908e-13
PFKFB4	3p21.31	0.372094	2.89515e-13
TXNDC17	17p13.1	0.371886	2.99152e-13
TCOF1	5q32-q33.1	0.371672	3.09388e-13
LGALS9C	17p11.2	0.371655	3.10176e-13
GALNS	16q24.3	0.371619	3.11959e-13
PNMA1	14q24.3	0.371607	3.12564e-13
FMNL1	17q21.31	0.371562	3.14779e-13
TOMM5	9p13.2	0.371172	3.34613e-13
EIF3CL	16p12.1	0.370988	3.44407e-13
TMSB4XP8	4q22.1	0.370803	3.54538e-13
MLLT3	9p21.3	0.370789	3.55281e-13
CCDC96	4p16.1	0.370781	3.55739e-13
MLKL	16q23.1	0.370689	3.60916e-13
PTPN6	12p13.31	0.370576	3.67332e-13
FAM81A	15q22.2	0.370537	3.69601e-13
RRP36	6p21.1	0.370529	3.70016e-13
MX2	21q22.3	0.370416	3.76635e-13
ETV6	12p13.2	0.370388	3.78259e-13
CAPZB	1p36.13	0.370363	3.79767e-13
GPC2	7q22.1	0.370342	3.81e-13
CCT4	2p15	0.370169	3.91433e-13
CCND3	6p21.1	0.370143	3.93039e-13
CCDC43	17q21.31	0.370114	3.94827e-13
MSC	8q13.3	0.36999	4.02542e-13
MMP1	11q22.2	0.369887	4.0907e-13
HMGXB3	5q32	0.369783	4.15757e-13
SIGLEC10	19q13.41	0.369717	4.20082e-13
PPP2R3A	3q22.2-q22.3	0.36964	4.25131e-13
POMP	13q12.3	0.369417	4.40145e-13
WDR34	9q34.11	0.369344	4.45181e-13
SLC66A1L	3q25.32	0.369268	4.5049e-13
RIMBP3	22q11.21	0.369238	4.52601e-13
DPF1	19q13.2	0.369016	4.6848e-13
PA2G4	12q13.2	0.369005	4.69335e-13
SMPD2	6q21	0.368897	4.77248e-13
TBX19	1q24.2	0.368851	4.80715e-13
RHOQ	2p21	0.368808	4.83877e-13
FUCA2	6q24.2	0.368793	4.85058e-13
FER1L4	20q11.22	0.368764	4.87204e-13
NTRK1	1q23.1	0.368673	4.94152e-13
SCG2	2q36.1	0.368607	4.99276e-13
AGRN	1p36.33	0.368594	5.00235e-13
CATSPER1	11q13.1	0.368582	5.01211e-13
KCTD10	12q24.11	0.368545	5.04125e-13
CYTH4	22q13.1	0.368501	5.07561e-13
SERPINB1	6p25.2	0.368472	5.09857e-13
SPINDOC	11q13.1	0.368394	5.16083e-13
CARD14	17q25.3	0.368338	5.20541e-13
MTFR2	6q23.3	0.368326	5.21504e-13
SIGLEC9	19q13.41	0.368277	5.25498e-13
OBSCN	1q42.13	0.36818	5.33503e-13
RELB	19q13.32	0.368121	5.38335e-13
NAP1L1	12q21.2	0.368073	5.42365e-13
TMEM164	Xq23	0.367974	5.50754e-13
EFTUD2	17q21.31	0.367969	5.51237e-13
FOXL1	16q24.1	0.367965	5.51517e-13
TMEM201	1p36.22	0.367953	5.52597e-13
PPP1R14D	15q15.1	0.367763	5.69118e-13
RNASET2	6q27	0.367665	5.7778e-13
OAZ3	1q21.3	0.367633	5.80676e-13
IL2RA	10p15.1	0.367631	5.80804e-13
SNRPD1	18q11.2	0.367446	5.97676e-13
NEFH	22q12.2	0.367286	6.1267e-13
BZW2	7p21.1	0.367112	6.29411e-13
AIF1	6p21.33	0.366739	6.66723e-13
LENG9	19q13.42	0.366612	6.79921e-13
TRAPPC3	1p34.3	0.366549	6.8648e-13
OXTR	3p25.3	0.365962	7.51469e-13
FAM155B	Xq13.1	0.365783	7.72517e-13
RAD54L	1p34.1	0.365711	7.81095e-13
EPDR1	7p14.1	0.36569	7.83632e-13
RASA3	13q34	0.365682	7.84594e-13
CTSA	20q13.12	0.365606	7.93799e-13
COX4I1	16q24.1	0.36555	8.00638e-13
SLC4A11	20p13	0.365482	8.09127e-13
NME3	16p13.3	0.365359	8.24506e-13
MED10	5p15.31	0.365208	8.43829e-13
SMCO2	12p11.23	0.364963	8.76215e-13
PGLS	19p13.11	0.364909	8.83491e-13
GULP1	2q32.1-q32.2	0.364826	8.94695e-13
ZNF446	19q13.43	0.364736	9.07245e-13
MAZ	16p11.2	0.364725	9.08787e-13
ABR	17p13.3	0.364699	9.12304e-13
RAC2	22q13.1	0.364649	9.19342e-13
SNRPA1	15q26.3	0.364648	9.19559e-13
CSTB	21q22.3	0.364578	9.29393e-13
CCDC137	17q25.3	0.364547	9.33907e-13
MAP2K2	19p13.3	0.364506	9.39774e-13
SH2B2	7q22.1	0.364258	9.76047e-13
PSMB8	6p21.32	0.364213	9.82791e-13
RHBDF2	17q25.1	0.364192	9.86006e-13
SFPQ	1p34.3	0.363972	1.01976e-12
ALOX5AP	13q12.3	0.363856	1.038e-12
EDA	Xq13.1	0.363721	1.05955e-12
RNASEK	17p13.1	0.3637	1.06292e-12
NRM	6p21.33	0.36365	1.07114e-12
PCLAF	15q22.31	0.36363	1.07434e-12
PRELID3A	18p11.21	0.363626	1.07512e-12
FXYD3	19q13.12	0.363624	1.07546e-12
RECQL4	8q24.3	0.363609	1.07793e-12
GPN2	1p36.11	0.363564	1.08536e-12
GALNT7	4q34.1	0.363524	1.09199e-12
PIGU	20q11.22	0.363477	1.09981e-12
POP4	19q12	0.363474	1.10026e-12
SLCO4A1	20q13.33	0.363398	1.1132e-12
UBE2T	1q32.1	0.363232	1.14166e-12
CORO1B	11q13.2	0.363232	1.14166e-12
IGLON5	19q13.41	0.363068	1.17058e-12
RNASE6	14q11.2	0.363053	1.17319e-12
PITX2	4q25	0.362924	1.1965e-12
LINC00336	6p21.31	0.362815	1.21658e-12
SLC7A6	16q22.1	0.362769	1.22508e-12
COL11A1	1p21.1	0.362748	1.229e-12
PSMC4	19q13.2	0.362691	1.23965e-12
CDC25B	20p13	0.362648	1.24787e-12
PDE6B	4p16.3	0.362553	1.266e-12
EPN3	17q21.33	0.362471	1.28183e-12
TMEM74B	20p13	0.362184	1.33912e-12
PIM3	22q13.33	0.362088	1.35877e-12
ACAN	15q26.1	0.361964	1.38462e-12
UBE2Z	17q21.32	0.361934	1.39093e-12
CCDC149	4p15.2	0.361737	1.43307e-12
WDR62	19q13.12	0.361567	1.47055e-12
KCNMB4	12q15	0.361563	1.47141e-12
GPRIN1	5q35.2	0.361489	1.4879e-12
CHRDL2	11q13.4	0.3613	1.53113e-12
CTRL	16q22.1	0.361298	1.53166e-12
OTULINL	5p15.2	0.361237	1.5458e-12
TIMM17B	Xp11.23	0.361156	1.56482e-12
PLB1	2p23.2	0.361129	1.57122e-12
H2AFX	11q23.3	0.36108	1.58289e-12
RUVBL1	3q21.3	0.360805	1.65022e-12
LINC00265	7p14.1	0.360653	1.68853e-12
ARHGEF16	1p36.32	0.360619	1.69738e-12
NECAP2	1p36.13	0.360436	1.74485e-12
NRIP3	11p15.4	0.360391	1.75674e-12
HTRA3	4p16.1	0.360255	1.79305e-12
NCF2	1q25.3	0.360191	1.81067e-12
EIF4A1	17p13.1	0.360048	1.85014e-12
WASF2	1p36.11	0.360006	1.86179e-12
CDT1	16q24.3	0.359958	1.87527e-12
C9ORF16	9q34.11	0.35994	1.88044e-12
NCS1	9q34.11	0.359934	1.88211e-12
RAVER1	19p13.2	0.359858	1.90368e-12
TOMM34	20q13.12	0.359826	1.91307e-12
MYPOP	19q13.32	0.359801	1.92013e-12
TCIRG1	11q13.2	0.359548	1.99486e-12
COPG1	3q21.3	0.359401	2.03936e-12
ECEL1	2q37.1	0.359398	2.04018e-12
TRIM16	17p12	0.359119	2.12781e-12
PRELID1	5q35.3	0.358919	2.19241e-12
HSH2D	19p13.11	0.358704	2.26459e-12
CD86	3q13.33	0.358628	2.29034e-12
TRAPPC1	17p13.1	0.358516	2.32928e-12
DTX2	7q11.23	0.358421	2.36257e-12
DENND3	8q24.3	0.358303	2.40497e-12
FAM192A	16q13	0.358258	2.42115e-12
NFE2L3	7p15.2	0.358229	2.43158e-12
CARMIL1	6p22.2	0.358024	2.50748e-12
GYS1	19q13.33	0.357981	2.52375e-12
RRAD	16q22.1	0.357921	2.5462e-12
PSORS1C1	6p21.33	0.357892	2.5576e-12
TFF2	21q22.3	0.357701	2.63153e-12
C2CD4A	15q22.2	0.357556	2.68917e-12
N4BP3	5q35.3	0.357517	2.7051e-12
CDK4	12q14.1	0.357445	2.73426e-12
SLC39A1	1q21.3	0.357434	2.73868e-12
ADGRE2	19p13.12	0.357327	2.78273e-12
CIDEC	3p25.3	0.35718	2.84464e-12
RAD51	15q15.1	0.357157	2.85422e-12
C1ORF122	1p34.3	0.357095	2.88075e-12
DLL3	19q13.2	0.357001	2.92137e-12
LOXL3	2p13.1	0.356959	2.94015e-12
HAVCR1	5q33.3	0.356892	2.96925e-12
KIF3C	2p23.3	0.356745	3.03523e-12
ATIC	2q35	0.356727	3.04327e-12
MED15	22q11.21	0.356709	3.05168e-12
TMEM159	16p12.3	0.356499	3.14847e-12
EPS8L3	1p13.3	0.356326	3.23046e-12
FAM227A	22q13.1	0.356268	3.25852e-12
XPNPEP1	10q25.1	0.356063	3.35947e-12
PHETA1	12q24.12	0.355992	3.39511e-12
MTA2	11q12.3	0.355775	3.50632e-12
DPP3	11q13.2	0.355601	3.59837e-12
CCT3	1q22	0.355585	3.60704e-12
EPHB3	3q27.1	0.355389	3.71308e-12
GSTP1	11q13.2	0.355309	3.75764e-12
CYREN	7q33	0.355289	3.76869e-12
CLCN7	16p13.3	0.355198	3.81961e-12
CIZ1	9q34.11	0.355113	3.86825e-12
IL2RG	Xq13.1	0.354968	3.95228e-12
ZYX	7q34	0.354873	4.00852e-12
MPP3	17q21.31	0.35487	4.00983e-12
EEF2KMT	16p13.3	0.354847	4.02351e-12
FAM90A1	12p13.31	0.354826	4.03656e-12
YDJC	22q11.21	0.35475	4.08214e-12
RDH13	19q13.42	0.354689	4.11897e-12
ICAM1	19p13.2	0.354681	4.12383e-12
OSM	22q12.2	0.354542	4.20917e-12
HOPX	4q12	0.354471	4.25385e-12
CAPZA1	1p13.2	0.354468	4.25579e-12
PDK3	Xp22.11	0.354432	4.27833e-12
SLC37A1	21q22.3	0.354409	4.29333e-12
C1QB	1p36.12	0.354378	4.31296e-12
TOX	8q12.1	0.354369	4.31874e-12
RILPL1	12q24.31	0.3543	4.36275e-12
TAF6	7q22.1	0.354281	4.37487e-12
ADRM1	20q13.33	0.354204	4.42486e-12
CLEC5A	7q34	0.354029	4.54069e-12
ELOC	8q21.11	0.353931	4.60729e-12
NQO1	16q22.1	0.353825	4.67971e-12
AP2S1	19q13.32	0.353817	4.68557e-12
DENND6B	22q13.33	0.353682	4.77927e-12
CACNB3	12q13.12	0.353637	4.81145e-12
SNHG12	1p35.3	0.353614	4.8279e-12
IL20RB	3q22.3	0.353551	4.87256e-12
NME6	3p21.31	0.353515	4.89857e-12
NOP56	20p13	0.353504	4.90667e-12
PLEKHG2	19q13.2	0.353412	4.97312e-12
COX8A	11q13.1	0.353371	5.00335e-12
ADAM28	8p21.2	0.353278	5.0726e-12
ASPHD1	16p11.2	0.353154	5.16632e-12
HSPB8	12q24.23	0.353062	5.23628e-12
DENND2D	1p13.3-p13.2	0.352952	5.32197e-12
PSMB9	6p21.32	0.35291	5.35508e-12
TLE3	15q23	0.352897	5.36522e-12
PPP1R9B	17q21.33	0.352864	5.39125e-12
PPP1CA	11q13.2	0.352757	5.47629e-12
PSMB10	16q22.1	0.352712	5.51284e-12
CENPH	5q13.2	0.352709	5.51555e-12
SPATS2	12q13.12	0.352613	5.59362e-12
DUOXA2	15q21.1	0.352211	5.93354e-12
C1QA	1p36.12	0.352151	5.98576e-12
CBR3	21q22.12	0.352039	6.08499e-12
TUBB6	18p11.21	0.352037	6.08705e-12
SLC7A11	4q28.3	0.351958	6.15788e-12
EIF3B	7p22.3	0.351901	6.20964e-12
FAM214B	9p13.3	0.351884	6.22534e-12
TM4SF19	3q29	0.351866	6.2413e-12
CPXM1	20p13	0.351748	6.35017e-12
TIMM22	17p13.3	0.351691	6.40372e-12
TRPC3	4q27	0.351545	6.54173e-12
NDUFS8	11q13.2	0.351541	6.54606e-12
CFAP45	1q23.2	0.351462	6.62132e-12
C1ORF159	1p36.33	0.351371	6.7109e-12
RFC2	7q11.23	0.351274	6.80621e-12
PDCD6	5p15.33	0.351197	6.88367e-12
TSEN34	19q13.42	0.351076	7.00634e-12
TALDO1	11p15.5	0.350961	7.12498e-12
SEMA4A	1q22	0.350944	7.1424e-12
ANKS3	16p13.3	0.350913	7.17466e-12
CYP2S1	19q13.2	0.350875	7.21518e-12
ZNF469	16q24.2	0.350793	7.30128e-12
STC2	5q35.2	0.350554	7.56027e-12
ARMCX6	Xq22.1	0.350468	7.65613e-12
SEMA4D	9q22.2	0.350462	7.66331e-12
DNAJC18	5q31.2	0.350422	7.70809e-12
PLA2G15	16q22.1	0.350396	7.73633e-12
TFE3	Xp11.23	0.350363	7.77412e-12
TEDC1	14q32.33	0.350332	7.80887e-12
NCF1	7q11.23	0.350264	7.88768e-12
DRAM1	12q23.2	0.35023	7.92619e-12
ATG4D	19p13.2	0.350026	8.16479e-12
SNN	16p13.13	0.350012	8.18223e-12
LARP4B	10p15.3	0.349939	8.26905e-12
SH2D5	1p36.12	0.349936	8.27338e-12
SOGA1	20q11.23	0.349876	8.3449e-12
UNC13D	17q25.1	0.349749	8.50149e-12
AMZ2	17q24.2	0.349644	8.63121e-12
COX6B1	19q13.12	0.34958	8.71192e-12
C11ORF49	11p11.2	0.349481	8.83816e-12
AFAP1-AS1	4p16.1	0.349472	8.85016e-12
GDI1	Xq28	0.349463	8.86197e-12
HID1	17q25.1	0.34944	8.89115e-12
SLC6A3	5p15.33	0.34937	8.98185e-12
ALOX5	10q11.21	0.349288	9.08924e-12
UBE2J2	1p36.33	0.349255	9.13346e-12
YBX3	12p13.2	0.349203	9.20259e-12
PCED1B	12q13.11	0.349173	9.24218e-12
ATP6V1H	8q11.23	0.34906	9.39552e-12
FLYWCH2	16p13.3	0.348854	9.68006e-12
TRAPPC2L	16q24.3	0.348828	9.71693e-12
PSMD9	12q24.31	0.348805	9.74958e-12
DAGLA	11q12.2	0.348757	9.81704e-12
TWF2	3p21.2	0.348751	9.82582e-12
ITGB2	21q22.3	0.348731	9.85479e-12
B3GAT3	11q12.3	0.348715	9.87795e-12
TNFAIP8L2	1q21.3	0.348702	9.89637e-12
BAX	19q13.33	0.34858	1.00719e-11
SLAMF8	1q23.2	0.34856	1.0102e-11
ARHGAP17	16p12.1	0.348382	1.03656e-11
SUPT5H	19q13.2	0.348341	1.04275e-11
TMEM44	3q29	0.348282	1.05163e-11
DPH2	1p34.1	0.348142	1.07317e-11
SF3B4	1q21.2	0.348037	1.08961e-11
MYL6B	12q13.2	0.348004	1.09481e-11
ACTG1	17q25.3	0.347917	1.10865e-11
PHEX	Xp22.11	0.347859	1.11789e-11
CENPO	2p23.3	0.34779	1.12921e-11
CCZ1	7p22.1	0.347637	1.1544e-11
TMEM189	20q13.13	0.347632	1.15526e-11
HCAR2	12q24.31	0.347505	1.17654e-11
FTH1	11q12.3	0.34749	1.17904e-11
WDR4	21q22.3	0.347408	1.19321e-11
CXCL5	4q13.3	0.347388	1.19655e-11
HCFC1R1	16p13.3	0.34735	1.2032e-11
CD70	19p13.3	0.347296	1.21253e-11
MRPS23	17q22	0.347273	1.21657e-11
ADGRF4	6p12.3	0.347071	1.25253e-11
MATK	19p13.3	0.347004	1.2647e-11
U2AF2	19q13.42	0.346724	1.31672e-11
SERPINH1	11q13.5	0.346723	1.31677e-11
AUNIP	1p36.11	0.346667	1.32745e-11
ITGB1BP1	2p25.1	0.346663	1.32817e-11
GBP2	1p22.2	0.346503	1.35907e-11
LBHD1	11q12.3	0.346479	1.3639e-11
MAP1S	19p13.11	0.346468	1.36607e-11
CERCAM	9q34.11	0.346465	1.36668e-11
DRP2	Xq22.1	0.346421	1.37523e-11
HKDC1	10q22.1	0.346181	1.42342e-11
THOC6	16p13.3	0.346079	1.44444e-11
ZBTB8OS	1p35.1	0.346057	1.44908e-11
HRK	12q24.22	0.345913	1.47926e-11
TRAF7	16p13.3	0.345859	1.49074e-11
NAT8L	4p16.3	0.345859	1.49078e-11
C12ORF75	12q23.3	0.345734	1.51786e-11
NDUFA8	9q33.2	0.34573	1.51865e-11
RBM17	10p15.1	0.345688	1.52785e-11
CMTM3	16q22.1	0.345651	1.53604e-11
FAM104A	17q25.1	0.34562	1.54279e-11
SULT1C2	2q12.3	0.345617	1.54355e-11
2021-03-03	5q23.2	0.345596	1.54803e-11
HM13	20q11.21	0.345527	1.5634e-11
GPD1L	3p22.3	0.345492	1.57125e-11
AREG	4q13.3	0.345383	1.59611e-11
UBE2C	20q13.12	0.345256	1.62527e-11
HK3	5q35.2	0.345212	1.63565e-11
NIBAN2	9q34.11	0.345181	1.64289e-11
ARNTL2	12p11.23	0.345174	1.6446e-11
ABHD11-AS1	7q11.23	0.345073	1.66835e-11
CENPA	2p23.3	0.345035	1.67758e-11
MAST2	1p34.1	0.344994	1.68742e-11
CACNB1	17q12	0.344931	1.70269e-11
MTHFD2	2p13.1	0.344873	1.71689e-11
CD58	1p13.1	0.344859	1.7203e-11
ARHGAP1	11p11.2	0.344829	1.72778e-11
NPL	1q25.3	0.344791	1.73714e-11
PLXNA3	Xq28	0.344679	1.76512e-11
ANXA2P1	4q31.3	0.344646	1.7735e-11
CIP2A	3q13.13	0.344492	1.81294e-11
ASF1B	19p13.12	0.344483	1.81514e-11
HLA-DMB	6p21.32	0.344335	1.85391e-11
YIF1B	19q13.2	0.344238	1.87966e-11
MAGED4	Xp11.22	0.343942	1.96063e-11
SNRPB	20p13	0.343896	1.97355e-11
TUBB4B	9q34.3	0.343833	1.99149e-11
ACYP1	14q24.3	0.34362	2.05255e-11
DNAJB13	11q13.4	0.343427	2.10988e-11
CD300LF	17q25.1	0.343357	2.13104e-11
CRYAB	11q23.1	0.343216	2.17415e-11
E2F3	6p22.3	0.343135	2.19908e-11
CLCF1	11q13.2	0.343135	2.19932e-11
CD74	5q33.1	0.343042	2.22842e-11
DDIT3	12q13.3	0.343029	2.23266e-11
MAFG	17q25.3	0.343022	2.23462e-11
GPR35	2q37.3	0.34297	2.25116e-11
KHDC1	6q13	0.342964	2.25317e-11
TPBG	6q14.1	0.342816	2.30105e-11
CBX3	7p15.2	0.342689	2.34276e-11
SF3B5	6q24.2	0.342648	2.35655e-11
C14ORF119	14q11.2	0.342563	2.38508e-11
MMD	17q22	0.342555	2.38786e-11
LY86	6p25.1	0.342467	2.41764e-11
CHAF1B	21q22.12-q22.13	0.342415	2.4355e-11
BRIX1	5p13.2	0.342338	2.46244e-11
B3GNT9	16q22.1	0.342234	2.49894e-11
AURKB	17p13.1	0.342228	2.50094e-11
FAP	2q24.2	0.342196	2.51255e-11
PFDN2	1q23.3	0.342152	2.52822e-11
SMARCA4	19p13.2	0.342017	2.57671e-11
SLC41A3	3q21.2-q21.3	0.342008	2.58028e-11
NDUFAF4	6q16.1	0.342006	2.58093e-11
POPDC3	6q21	0.341871	2.6306e-11
HNRNPAB	5q35.3	0.341811	2.65288e-11
CIAO2B	16q22.1	0.341806	2.65481e-11
VWA5A	11q24.2	0.341735	2.68158e-11
ANXA11	10q22.3	0.341637	2.71897e-11
THAP4	2q37.3	0.341412	2.80677e-11
VTCN1	1p13.1-p12	0.341402	2.81071e-11
CDSN	6p21.33	0.341181	2.89985e-11
POLR3D	8p21.3	0.341076	2.94308e-11
LMTK3	19q13.33	0.340979	2.98368e-11
STXBP2	19p13.2	0.34095	2.99572e-11
VPS18	15q15.1	0.340948	2.9967e-11
UNC45A	15q26.1	0.340946	2.99767e-11
TPM2	9p13.3	0.340776	3.07022e-11
CREB3L1	11p11.2	0.340719	3.09501e-11
TCAF2	7q35	0.340548	3.17043e-11
ATRAID	2p23.3	0.340529	3.1787e-11
RP9P	7p14.3	0.340466	3.20701e-11
MAFG-DT	17q25.3	0.340452	3.21351e-11
FBLIM1	1p36.21	0.34042	3.22785e-11
C1QC	1p36.12	0.340406	3.23439e-11
CLIP2	7q11.23	0.340215	3.32222e-11
ADAT3	19p13.3	0.340177	3.34005e-11
CDC6	17q21.2	0.340131	3.36173e-11
TRIM11	1q42.13	0.339852	3.49585e-11
OSBPL7	17q21.32	0.339735	3.55387e-11
LYPLA2	1p36.11	0.339681	3.58116e-11
CD80	3q13.33	0.339669	3.58688e-11
DHRS13	17q11.2	0.339639	3.60228e-11
BASP1	5p15.1	0.33961	3.61692e-11
TUBG1	17q21.2	0.339468	3.68945e-11
TESK1	9p13.3	0.339294	3.78085e-11
SPACA6	19q13.41	0.339244	3.80722e-11
FUS	16p11.2	0.339227	3.8163e-11
COL16A1	1p35.2	0.339222	3.81909e-11
NFATC4	14q12	0.339218	3.82084e-11
ST6GALNAC5	1p31.1	0.339117	3.87561e-11
CRABP2	1q23.1	0.339111	3.87874e-11
UBL4A	Xq28	0.339077	3.89699e-11
SLC35F2	11q22.3	0.339023	3.92655e-11
SLC7A8	14q11.2	0.338846	4.02528e-11
URM1	9q34.11	0.338741	4.08493e-11
CAPN10	2q37.3	0.338727	4.09272e-11
CRYBB1	22q12.1	0.338721	4.09616e-11
ASPHD2	22q12.1	0.338704	4.10584e-11
WDR1	4p16.1	0.338652	4.13591e-11
ASRGL1	11q12.3	0.338501	4.2244e-11
IL17B	5q32	0.33838	4.29583e-11
GFPT2	5q35.3	0.33832	4.33205e-11
DNASE1	16p13.3	0.338303	4.34285e-11
VAV1	19p13.3	0.338291	4.35003e-11
GAGE12J	Xp11.23	0.338288	4.35159e-11
FAM241B	10q22.1	0.33825	4.3747e-11
ALDH3B1	11q13.2	0.338228	4.3883e-11
TXNDC12	1p32.3	0.338198	4.40645e-11
AKR1C3	10p15.1	0.338117	4.45654e-11
TNFAIP8	5q23.1	0.338115	4.45798e-11
CCDC28B	1p35.2	0.338064	4.48983e-11
ATP5MF	7q22.1	0.337947	4.56396e-11
ARMC9	2q37.1	0.337924	4.57854e-11
WSB2	12q24.23	0.337909	4.58807e-11
ZNF579	19q13.42	0.337876	4.60918e-11
LRRC25	19p13.11	0.337658	4.75139e-11
PERM1	1p36.33	0.33765	4.75645e-11
PPP1R15A	19q13.33	0.337577	4.80529e-11
MMP10	11q22.2	0.337429	4.90529e-11
COMTD1	10q22.2	0.337295	4.99772e-11
PLK3	1p34.1	0.337191	5.0699e-11
TK1	17q25.3	0.33715	5.099e-11
MEIS3	19q13.32	0.33714	5.10645e-11
CCNQ	Xq28	0.337103	5.13247e-11
ATP5F1E	20q13.32	0.337042	5.17651e-11
BRI3BP	12q24.31	0.336737	5.40033e-11
MARCKS	6q21	0.336721	5.41191e-11
SLC66A1	1p36.13	0.336678	5.44466e-11
ICAM4	19p13.2	0.336653	5.46333e-11
PRXL2B	1p36.32	0.336568	5.52866e-11
CCNJL	5q33.3	0.336555	5.53876e-11
LSM8	7q31.31	0.336414	5.64786e-11
MTMR2	11q21	0.336353	5.69538e-11
ANXA2P3	10q21.3	0.336322	5.72046e-11
CSF1R	5q32	0.336292	5.74391e-11
TRAIP	3p21.31	0.336253	5.77532e-11
DHX37	12q24.31	0.336179	5.83448e-11
KCNN4	19q13.31	0.336138	5.86818e-11
DHDH	19q13.33	0.336052	5.93839e-11
BNIP1	5q35.1	0.336027	5.95903e-11
WDR77	1p13.2	0.335902	6.06282e-11
NDUFB2-AS1	7q34	0.335848	6.10872e-11
ASAP1	8q24.21-q24.22	0.335791	6.15638e-11
PVT1	8q24.21	0.335622	6.30264e-11
ARHGAP39	8q24.3	0.335474	6.43211e-11
IRF3	19q13.33	0.335471	6.43544e-11
C4ORF47	4q35.1	0.335463	6.44191e-11
UTP4	16q22.1	0.335374	6.52177e-11
FOXE3	1p33	0.335132	6.7437e-11
PLEKHA8P1	12q12	0.334987	6.87971e-11
STRN4	19q13.32	0.334884	6.97802e-11
SLC25A3	12q23.1	0.334718	7.14019e-11
ANO4	12q23.1	0.334708	7.14994e-11
CENPW	6q22.32	0.334666	7.19083e-11
CDC42	1p36.12	0.334643	7.2142e-11
KHDRBS1	1p35.2	0.33448	7.37753e-11
GPSM3	6p21.32	0.334477	7.3804e-11
GNAZ	22q11.22-q11.23	0.334446	7.41262e-11
VCP	9p13.3	0.33442	7.43917e-11
LMNA	1q22	0.33435	7.51062e-11
STX18	4p16.3-p16.2	0.334236	7.62956e-11
ZC2HC1A	8q21.13	0.334108	7.76571e-11
ITPR3	6p21.31	0.334058	7.81833e-11
MFAP2	1p36.13	0.334009	7.87114e-11
P3H3	12p13.31	0.334009	7.87159e-11
PIP4K2A	10p12.2	0.334008	7.87242e-11
CD101	1p13.1	0.334001	7.88029e-11
RUBCNL	13q14.13	0.333987	7.89581e-11
B3GNT7	2q37.1|2q37.1	0.333952	7.9336e-11
GOLGA2P7	15q25.2	0.333933	7.95382e-11
CAPN9	1q42.2	0.333908	7.98163e-11
SLC35F6	2p23.3	0.333872	8.02071e-11
CACNA1G	17q21.33	0.333777	8.126e-11
ADAM8	10q26.3	0.333676	8.23982e-11
EPS8L1	19q13.42	0.33367	8.24639e-11
HLA-A	6p22.1	0.333597	8.32991e-11
APOBR	16p12.1	0.333563	8.3694e-11
POP1	8q22.2	0.333511	8.42928e-11
P3H1	1p34.2	0.333467	8.48029e-11
CHI3L2	1p13.2	0.333427	8.52701e-11
LSM4	19p13.11	0.333228	8.76274e-11
SLC4A2	7q36.1	0.333152	8.85402e-11
CD24	6q21	0.33315	8.85683e-11
ASNS	7q21.3	0.333129	8.88246e-11
IST1	16q22.2	0.333021	9.01457e-11
PDE4A	19p13.2	0.332818	9.26854e-11
ATP6V0D1	16q22.1	0.332792	9.30187e-11
KCNQ1	11p15.5-p15.4	0.332755	9.34848e-11
C2ORF70	2p23.3	0.33275	9.35561e-11
DCAF13	8q22.3	0.332672	9.456e-11
NXT1	20p11.21	0.332569	9.58965e-11
TEX19	17q25.3	0.332556	9.6068e-11
SLCO5A1	8q13.3	0.332443	9.75619e-11
SQSTM1	5q35.3	0.332406	9.80615e-11
FIBP	11q13.1	0.332386	9.83273e-11
PSMA1	11p15.2	0.332365	9.86006e-11
HCK	20q11.21	0.33234	9.89477e-11
PLPP2	19p13.3	0.3323	9.94931e-11
TNFRSF8	1p36.22	0.332226	1.00494e-10
LIMCH1	4p13	0.332128	1.01851e-10
SERTAD3	19q13.2	0.332123	1.01918e-10
DHX34	19q13.32	0.332117	1.02004e-10
SCNM1	1q21.3	0.332116	1.02018e-10
WNT10A	2q35	0.332039	1.03089e-10
PLAC1	Xq26.3	0.332019	1.03371e-10
LOC154761	7q35	0.332016	1.03415e-10
SDC3	1p35.2	0.332015	1.03435e-10
PAGR1	16p11.2	0.331757	1.07136e-10
MAD2L1	4q27	0.331596	1.09513e-10
GAP43	3q13.31	0.331388	1.12664e-10
CD300LB	17q25.1	0.331321	1.13702e-10
ISY1	3q21.3	0.331294	1.14114e-10
ARHGEF2	1q22	0.331231	1.15101e-10
KCNK9	8q24.3	0.331105	1.17081e-10
BATF	14q24.3	0.330936	1.19813e-10
RAB20	13q34	0.330774	1.22476e-10
ABHD12	20p11.21	0.330765	1.22618e-10
KREMEN2	16p13.3	0.33066	1.24382e-10
INSL3	19p13.11	0.330594	1.25504e-10
BEST1	11q12.3	0.330511	1.26922e-10
NTMT1	9q34.11	0.330381	1.29193e-10
SLC22A15	1p13.1	0.330375	1.29298e-10
TARS	5p13.3	0.330354	1.29667e-10
CLEC2L	7q34	0.330322	1.30228e-10
CSF2RA	Xp22.33 and Yp11.2	0.330263	1.31275e-10
SOX4	6p22.3	0.330234	1.31796e-10
TTYH3	7p22.3	0.330211	1.32201e-10
EME1	17q21.33	0.330194	1.32501e-10
RABIF	1q32.1	0.33006	1.34939e-10
SFN	1p36.11	0.32996	1.36771e-10
CDCA3	12p13.31	0.329629	1.43044e-10
DMAC2	19q13.2	0.329541	1.44751e-10
ZBTB17	1p36.13	0.329453	1.46478e-10
LRRC59	17q21.33	0.329449	1.46575e-10
COX7A2	6q14.1	0.329383	1.4788e-10
AMD1	6q21	0.329329	1.48969e-10
ACOT7	1p36.31	0.329263	1.50305e-10
KIF22	16p11.2	0.329244	1.50677e-10
TMED3	15q25.1	0.329215	1.5128e-10
NOVA1	14q12	0.329203	1.51514e-10
UGT1A10	2q37.1	0.329139	1.52835e-10
PKIA	8q21.13	0.329037	1.54965e-10
RBM19	12q24.13-q24.21	0.32903	1.551e-10
MMP7	11q22.2	0.329005	1.5563e-10
PLEKHO2	15q22.31	0.329002	1.55699e-10
COX7C	5q14.3	0.328998	1.55764e-10
RELL1	4p14	0.328918	1.5746e-10
PHLDB1	11q23.3	0.328842	1.59096e-10
MAPK12	22q13.33	0.328747	1.61135e-10
RHNO1	12p13.33	0.328672	1.62781e-10
CKS1B	1q21.3	0.328606	1.64232e-10
TAF10	11p15.4	0.328605	1.64255e-10
MISP	19p13.3	0.328603	1.64292e-10
NHLRC4	16p13.3	0.328479	1.67069e-10
C16ORF74	16q24.1	0.328473	1.67211e-10
TRIM6	11p15.4	0.328397	1.6893e-10
CERS1	19p13.11	0.328261	1.72036e-10
WARS	14q32.2	0.328206	1.73318e-10
CRYM-AS1	16p12.2	0.328196	1.73551e-10
ASAH1	8p22	0.328188	1.73748e-10
CLLU1OS	12q22	0.328106	1.75679e-10
RAP1B	12q15	0.328093	1.75969e-10
ATP5MC3	2q31.1	0.328076	1.76371e-10
RBX1	22q13.2	0.327941	1.79609e-10
UMODL1	21q22.3	0.327854	1.81736e-10
TIMM50	19q13.2	0.327534	1.89715e-10
ISL2	15q24.3	0.327461	1.91572e-10
PDZD7	10q24.31	0.327394	1.93299e-10
ZDHHC13	11p15.1	0.327381	1.93632e-10
GNL2	1p34.3	0.327363	1.94101e-10
FSCN1	7p22.1	0.327352	1.94389e-10
FZD7	2q33.1	0.327337	1.94778e-10
NUP43	6q25.1	0.327256	1.96927e-10
CCNF	16p13.3	0.327212	1.98085e-10
EPS15L1	19p13.11	0.327141	1.99966e-10
ETV4	17q21.31	0.327109	2.00834e-10
FAAP20	1p36.33	0.3269	2.06529e-10
SCAMP3	1q22	0.326693	2.1235e-10
CYBC1	17q25.3	0.326687	2.12511e-10
SSR2	1q22	0.326587	2.15382e-10
GPC4	Xq26.2	0.326544	2.16631e-10
LAMTOR4	7q22.1	0.326468	2.18833e-10
RNF19B	1p35.1	0.326456	2.19187e-10
SCIN	7p21.3	0.326446	2.19493e-10
ODC1	2p25.1	0.326187	2.27197e-10
DKKL1	19q13.33	0.326159	2.28075e-10
RNASE1	14q11.2	0.326135	2.28788e-10
GAGE12D	Xp11.23	0.326101	2.2983e-10
FAM169B	15q26.3	0.32606	2.31112e-10
BEST3	12q15	0.325999	2.32989e-10
FAM225A	9q32	0.325855	2.37521e-10
KRT17	17q21.2	0.325817	2.38717e-10
LIMK2	22q12.2	0.325789	2.39601e-10
CACYBP	1q25.1	0.325702	2.42395e-10
ELOB	16p13.3	0.325643	2.44332e-10
SLC11A1	2q35	0.325624	2.44944e-10
ALPP	2q37.1	0.325596	2.45868e-10
GAGE4	Xp11.4-p11.2	0.325584	2.46265e-10
DBNL	7p13	0.325548	2.47443e-10
PPP5C	19q13.32	0.325547	2.47476e-10
LILRB3	19q13.42	0.325539	2.47748e-10
LSP1	11p15.5	0.325501	2.49e-10
GLG1	16q23.1	0.325487	2.49461e-10
B3GNT4	12q24.31	0.325472	2.4997e-10
ERI3	1p34.1	0.325288	2.56165e-10
AKT1S1	19q13.33	0.325133	2.61509e-10
LDHA	11p15.1	0.325097	2.62756e-10
POF1B	Xq21.1	0.325089	2.63046e-10
HES2	1p36.31	0.325042	2.6467e-10
BAG3	10q26.11	0.32491	2.69374e-10
PIP	7q34	0.324888	2.7017e-10
APRT	16q24.3	0.32486	2.71176e-10
PLEKHM2	1p36.21	0.324752	2.75089e-10
CIB2	15q25.1	0.324723	2.76135e-10
DUOX2	15q21.1	0.32456	2.82194e-10
PTTG3P	8q13.1	0.324557	2.82317e-10
SLC37A2	11q24.2	0.324466	2.85722e-10
ABCB9	12q24.31	0.324319	2.91376e-10
PYCR2	1q42.12	0.324313	2.91604e-10
ATP6V0E1	5q35.1	0.32428	2.92891e-10
DUSP5	10q25.2	0.324199	2.96046e-10
STAB1	3p21.1	0.324069	3.01189e-10
PSMB4	1q21.3	0.324062	3.01476e-10
TNFRSF10C	8p21.3	0.324019	3.03187e-10
SAP30	4q34.1	0.323976	3.04929e-10
TFAP2C	20q13.31	0.323969	3.05221e-10
AP1M2	19p13.2	0.323961	3.05541e-10
PPP1R14C	6q25.1	0.323947	3.06089e-10
MAPK13	6p21.31	0.323939	3.06419e-10
GGN	19q13.2	0.323871	3.09198e-10
ADGRB1	8q24.3	0.323814	3.11545e-10
CCDC22	Xp11.23	0.32376	3.13782e-10
TRAF5	1q32.3	0.323698	3.16346e-10
C10ORF91	10q26.3	0.323695	3.16507e-10
DYNC1H1	14q32.31	0.323623	3.19507e-10
NOC4L	12q24.33	0.323596	3.20662e-10
SYCE1L	16q23.1	0.323575	3.21553e-10
CLIC6	21q22.12	0.323568	3.21843e-10
NMB	15q25.2	0.323485	3.254e-10
GOLGA2P10	15q25.2	0.323458	3.26565e-10
RAB33A	Xq26.1	0.323258	3.35311e-10
PAM16	16p13.3	0.32324	3.36108e-10
POLE4	2p12	0.323239	3.36188e-10
SMTNL2	17p13.2	0.323134	3.4089e-10
TIMMDC1	3q13.33	0.323093	3.42705e-10
TSPAN3	15q24.3	0.323088	3.42962e-10
CKAP4	12q23.3	0.323069	3.4379e-10
MCEMP1	19p13.2	0.323063	3.44089e-10
C11ORF80	11q13.2	0.322986	3.47583e-10
FAM219A	9p13.3	0.322973	3.48172e-10
MRPL9	1q21.3	0.322958	3.48895e-10
GPNMB	7p15.3	0.322889	3.52073e-10
DYNC1LI1	3p22.3	0.322851	3.53858e-10
EPHX4	1p22.1	0.322805	3.56004e-10
LST1	6p21.33	0.322713	3.60354e-10
TRIM54	2p23.3	0.322612	3.65196e-10
C11ORF45	11q24.3	0.32253	3.69155e-10
YEATS2	3q27.1	0.322522	3.69537e-10
HCAR3	12q24.31	0.322458	3.72647e-10
CBFB	16q22.1	0.322395	3.75752e-10
GAGE1	Xp11.23	0.322391	3.75981e-10
MARS	12q13.3	0.322374	3.76823e-10
PIFO	1p13.2	0.322331	3.78959e-10
TLCD5	11q23.3	0.322314	3.79802e-10
IQCE	7p22.3	0.322255	3.8278e-10
IL15	4q31.21	0.322238	3.83611e-10
LHFPL3-AS2	7q22.2-q22.3	0.322073	3.9206e-10
NME2P1	12q24.23	0.322072	3.92087e-10
CEP131	17q25.3	0.321992	3.9623e-10
COX7B	Xq21.1	0.321676	4.13059e-10
ARL11	13q14.2	0.321542	4.2041e-10
PRPF31	19q13.42	0.321374	4.29799e-10
TFAP2E	1p34.3	0.321358	4.30655e-10
BCL11A	2p16.1	0.321271	4.35618e-10
LINC01011	6p25.2	0.321197	4.39896e-10
KCTD5	16p13.3	0.321132	4.43651e-10
IQGAP3	1q22	0.321067	4.47468e-10
CD1A	1q23.1	0.321009	4.50837e-10
CS	12q13.3	0.320981	4.52521e-10
GNB3	12p13.31	0.320942	4.54819e-10
SLC52A1	17p13.2	0.32091	4.56732e-10
GNGT2	17q21.32	0.320746	4.66666e-10
P3H4	17q21.2	0.320651	4.72479e-10
TMEM120B	12q24.31	0.320622	4.74312e-10
DRC1	2p23.3	0.320612	4.74937e-10
C5AR1	19q13.32	0.320507	4.81519e-10
FXYD2	11q23.3	0.320464	4.84219e-10
EGFL6	Xp22.2	0.320434	4.86112e-10
PAX8	2q14.1	0.320429	4.86428e-10
SLC43A2	17p13.3	0.320318	4.93574e-10
RUNX1	21q22.12	0.320307	4.94255e-10
SARS	1p13.3	0.320206	5.0083e-10
RALA	7p14.1	0.320177	5.02736e-10
DNAJB6	7q36.3	0.320051	5.111e-10
MIEN1	17q12	0.320039	5.1189e-10
ACO2	22q13.2	0.319979	5.15913e-10
CA11	19q13.33	0.319958	5.17301e-10
FOXF2	6p25.3	0.319928	5.19336e-10
AATF	17q12	0.31984	5.25371e-10
PLAU	10q22.2	0.319806	5.27668e-10
POLR2L	11p15.5	0.319778	5.2962e-10
FMNL2	2q23.3	0.319758	5.30991e-10
SPECC1	17p11.2	0.319675	5.36794e-10
TXNDC9	2q11.2	0.319587	5.42989e-10
PNPLA1	6p21.31	0.319544	5.46052e-10
VGF	7q22.1	0.319502	5.49027e-10
SMAP1	6q13	0.319473	5.51134e-10
CNTNAP1	17q21.2	0.319405	5.56015e-10
FAM72B	1p11.2	0.31939	5.57078e-10
NCAPG	4p15.31	0.319382	5.57657e-10
LHFPL5	6p21.31	0.319348	5.60166e-10
PTHLH	12p11.22	0.319275	5.655e-10
RUSC1	1q22	0.319255	5.67002e-10
ME1	6q14.2	0.319241	5.6801e-10
WIPF3	7p14.3	0.319127	5.76546e-10
CALU	7q32.1	0.319114	5.77524e-10
WNT10B	12q13.12	0.319034	5.83554e-10
BICD1	12p11.21	0.319016	5.84929e-10
MED8	1p34.2	0.318979	5.87763e-10
PHB	17q21.33	0.318967	5.88609e-10
PILRA	7q22.1	0.318918	5.92442e-10
GALNT5	2q24.1	0.31886	5.96877e-10
KCNK3	2p23.3	0.318735	6.06648e-10
SPINT1	15q15.1	0.31869	6.1026e-10
FLNC	7q32.1	0.318594	6.17862e-10
ENAH	1q42.12	0.318593	6.17977e-10
LOC153910	6q24.2	0.318537	6.22485e-10
COX5A	15q24.2	0.31849	6.26292e-10
SLC39A10	2q32.3	0.318389	6.34566e-10
LYL1	19p13.13	0.318234	6.47469e-10
CDH15	16q24.3	0.318195	6.50728e-10
LETM1	4p16.3	0.318164	6.53373e-10
SHC1	1q21.3	0.318107	6.5823e-10
CDCA5	11q13.1	0.317989	6.68361e-10
PUDP	Xp22.31	0.317971	6.69945e-10
PTPRO	12p12.3|12p13-p12	0.317928	6.73669e-10
FBN2	5q23.3	0.317895	6.76567e-10
SIPA1	11q13.1	0.31788	6.77852e-10
MPHOSPH6	16q23.3	0.317863	6.79354e-10
MAMSTR	19q13.33	0.317696	6.9424e-10
GPD2	2q24.1	0.317546	7.07802e-10
GPX8	5q11.2	0.317501	7.11984e-10
SPA17	11q24.2	0.317433	7.18241e-10
YARS2	12p11.21	0.317415	7.19966e-10
MRTO4	1p36.13	0.317406	7.20757e-10
SLC7A5	16q24.2	0.317337	7.2726e-10
EBI3	19p13.3	0.3173	7.30703e-10
DDX27	20q13.13	0.317291	7.31554e-10
AMPD3	11p15.4	0.317158	7.44238e-10
ZP3	7q11.23	0.317085	7.51321e-10
NFAM1	22q13.2	0.317029	7.56783e-10
ZBED2	3q13.13	0.317009	7.58705e-10
CYC1	8q24.3	0.316959	7.63627e-10
LINC00626	1q24.2	0.316815	7.78027e-10
MIDN	19p13.3	0.316778	7.81688e-10
SYTL3	6q25.3	0.316766	7.82956e-10
LSP1P4	2p11.2	0.316721	7.87441e-10
COL1A1	17q21.33	0.316664	7.93315e-10
NOP16	5q35.2	0.316653	7.94371e-10
VLDLR	9p24.2	0.316631	7.9666e-10
LINC01587	4p16.2	0.316443	8.16172e-10
UTF1	10q26.3	0.316426	8.17964e-10
KCND2	7q31.31	0.316397	8.2103e-10
PSCA	8q24.3	0.316358	8.25227e-10
PSRC1	1p13.3	0.316337	8.27495e-10
RIPOR1	16q22.1	0.316309	8.30461e-10
IFT52	20q13.12	0.316294	8.32087e-10
PRKD2	19q13.32	0.316089	8.54288e-10
VSIG1	Xq22.3	0.31608	8.55292e-10
JPT2	16p13.3	0.315938	8.7102e-10
GFER	16p13.3	0.315813	8.85138e-10
LOC341056	11q24.1	0.315785	8.88393e-10
CARD11	7p22.2	0.315744	8.93047e-10
RAB10	2p23.3	0.315649	9.04098e-10
PPAN	19p13.2	0.315514	9.19829e-10
MAN1B1	9q34.3	0.315497	9.21837e-10
CDR2L	17q25.1	0.315459	9.26355e-10
SPSB2	12p13.31	0.315309	9.44394e-10
TIMM23	10q11.22	0.315142	9.64872e-10
ITGAV	2q32.1	0.315007	9.81661e-10
DFFA	1p36.22	0.315003	9.82211e-10
ITGAX	16p11.2	0.315002	9.82341e-10
NTM	11q25	0.314922	9.92456e-10
NABP1	2q32.3	0.314901	9.95119e-10
TFF1	21q22.3	0.31485	1.0016e-09
GAS7	17p13.1	0.314797	1.00846e-09
TNFSF13B	13q33.3	0.314792	1.00907e-09
IL21R	16p12.1	0.314739	1.01598e-09
SRC	20q11.23	0.314716	1.01898e-09
BCL3	19q13.32	0.314619	1.03174e-09
OSGIN2	8q21.3	0.314583	1.03648e-09
KRT79	12q13.13	0.314513	1.04581e-09
MMP14	14q11.2	0.3145	1.04759e-09
CHRNA5	15q25.1	0.314469	1.05169e-09
ATP5MG	11q23.3	0.314357	1.06697e-09
DNAJC7	17q21.2	0.314266	1.07936e-09
CHCHD2	7p11.2	0.314195	1.0892e-09
CFD	19p13.3	0.314152	1.09524e-09
EVC2	4p16.2	0.314103	1.1021e-09
ABI3	17q21.32	0.314071	1.10666e-09
PTPRE	10q26.2	0.314022	1.11359e-09
F3	1p21.3	0.313952	1.12359e-09
CD44	11p13	0.313947	1.12433e-09
SLC4A3	2q35	0.313778	1.14884e-09
KLK1	19q13.33	0.313678	1.16359e-09
UQCC3	11q12.3	0.313667	1.16521e-09
NME4	16p13.3	0.313557	1.18173e-09
TNFRSF11A	18q21.33	0.313544	1.18361e-09
EIF5A	17p13.1	0.313527	1.18623e-09
AKAP8L	19p13.12	0.313485	1.19255e-09
NCF1B	7q11.23	0.313384	1.20803e-09
ZNF296	19q13.32	0.313372	1.20985e-09
LUC7L	16p13.3	0.313364	1.21107e-09
STMN1	1p36.11	0.31332	1.21799e-09
PLCD3	17q21.31	0.313269	1.2259e-09
AURKA	20q13.2	0.313182	1.23945e-09
KLHDC8A	1q32.1	0.313162	1.24263e-09
KCTD1	18q11.2	0.313106	1.2516e-09
TMEM92	17q21.33	0.313012	1.26661e-09
SPIRE1	18p11.21	0.312996	1.26918e-09
PAQR5	15q23	0.312928	1.28029e-09
ATP5F1EP2	13q12.2	0.312833	1.29576e-09
TMEM243	7q21.12	0.312723	1.31401e-09
SNHG6	8q13.1|8q13	0.312686	1.32021e-09
VEGFB	11q13.1	0.312669	1.32319e-09
HSPA4	5q31.1	0.312664	1.32397e-09
ATG3	3q13.2	0.312587	1.33706e-09
KLHL29	2p24.1	0.312569	1.34003e-09
ISG20	15q26.1	0.312511	1.35001e-09
KISS1R	19p13.3	0.312447	1.36095e-09
MXRA8	1p36.33	0.31235	1.37776e-09
GDF1	19p13.11	0.312348	1.37811e-09
NDUFAB1	16p12.2	0.312298	1.38697e-09
MCOLN2	1p22.3	0.312253	1.39482e-09
TRADD	16q22.1	0.312209	1.40277e-09
ARNT2	15q25.1	0.312205	1.40336e-09
ALYREF	17q25.3	0.312098	1.42254e-09
RNH1	11p15.5	0.311944	1.4506e-09
GIPR	19q13.32	0.311871	1.46415e-09
NDOR1	9q34.3	0.311798	1.47766e-09
TMPRSS7	3q13.2	0.311789	1.47947e-09
PDCD2	6q27	0.311699	1.49645e-09
NR1H2	19q13.33	0.311687	1.4986e-09
MVB12A	19p13.11	0.311595	1.51617e-09
MED7	5q33.3	0.31158	1.51916e-09
MRC2	17q23.2	0.311559	1.5232e-09
GJC2	1q42.13	0.311518	1.53106e-09
CLCNKA	1p36.13	0.311513	1.53199e-09
RFPL1S	22q12.2	0.311383	1.55752e-09
CD151	11p15.5	0.311358	1.56231e-09
GALR2	17q25.1	0.311343	1.56537e-09
EFNB1	Xq13.1	0.311322	1.56949e-09
CNFN	19q13.2	0.311285	1.57679e-09
C6ORF223	6p21.1	0.311248	1.58422e-09
VASH2	1q32.3	0.311158	1.60244e-09
CD177	19q13.31	0.311149	1.60431e-09
EFHD2	1p36.21	0.311042	1.626e-09
SP140L	2q37.1	0.311038	1.62695e-09
GLIS2	16p13.3	0.310993	1.63612e-09
EPHX3	19p13.12	0.310981	1.63866e-09
CTLA4	2q33.2	0.31098	1.63881e-09
TMEM40	3p25.2	0.310928	1.64958e-09
MFSD12	19p13.3	0.310875	1.66064e-09
INTS8	8q22.1	0.31081	1.67445e-09
SLC35A4	5q31.3	0.310736	1.69017e-09
SCGB2A1	11q12.3	0.310683	1.70138e-09
SYNC	1p35.1	0.310637	1.71129e-09
SRSF12	6q15	0.310591	1.7212e-09
HLA-DQB2	6p21.32	0.310508	1.73939e-09
RAB32	6q24.3	0.310486	1.74415e-09
SF3A3	1p34.3	0.310454	1.7514e-09
MDFI	6p21.1	0.310403	1.76266e-09
TLDC2	20q11.23	0.310387	1.76611e-09
MANF	3p21.2	0.310342	1.77627e-09
DNAJC6	1p31.3	0.310277	1.79083e-09
MAP1A	15q15.3	0.310065	1.83915e-09
TCN2	22q12.2	0.310001	1.85421e-09
FGF9	13q12.11	0.309947	1.86677e-09
CORO1C	12q24.11	0.309875	1.88385e-09
CYSTM1	5q31.3	0.309834	1.8935e-09
IFITM2	11p15.5	0.309794	1.90296e-09
BPIFA2	20q11.21	0.309629	1.94297e-09
PES1	22q12.2	0.309628	1.94325e-09
PRKCD	3p21.1	0.309592	1.95193e-09
MYL6	12q13.2	0.309587	1.95313e-09
CILP2	19p13.11	0.309537	1.9655e-09
B3GNT8	19q13.2	0.30948	1.97965e-09
SNHG3	1p35.3	0.309461	1.9843e-09
NAP1L4	11p15.4	0.309328	2.01777e-09
IQCA1	2q37.2-q37.3	0.309319	2.02014e-09
PTMA	2q37.1	0.309263	2.03438e-09
CHST4	16q22.2	0.309225	2.04399e-09
RPS6KA1	1p36.11	0.3092	2.05046e-09
LOC643387	2q37.3	0.309059	2.08696e-09
C1ORF127	1p36.22	0.309019	2.09747e-09
NEU1	6p21.33	0.308921	2.12356e-09
WNK2	9q22.31	0.308876	2.13551e-09
MPP6	7p15.3	0.308797	2.15662e-09
CORO1A	16p11.2	0.308781	2.16098e-09
KNDC1	10q26.3	0.308725	2.17611e-09
OTOF	2p23.3	0.30871	2.18041e-09
TMEM11	17p11.2	0.308695	2.18435e-09
DIRAS2	9q22.2	0.308647	2.19755e-09
VMO1	17p13.2	0.308505	2.23688e-09
TIPIN	15q22.31	0.308484	2.243e-09
MITF	3p13	0.308438	2.25589e-09
TSPAN4	11p15.5	0.308411	2.26352e-09
CSF3R	1p34.3	0.3083	2.29497e-09
FSTL4	5q31.1	0.308297	2.29609e-09
GPR137B	1q42.3	0.308291	2.29778e-09
DDX49	19p13.11	0.308125	2.34578e-09
SNRPGP15	19p13.12	0.307986	2.38698e-09
UCP2	11q13.4	0.30797	2.39167e-09
FOXD1	5q13.2	0.307876	2.42001e-09
LYPD1	2q21.2	0.307856	2.42614e-09
CORO6	17q11.2	0.307794	2.44501e-09
HVCN1	12q24.11	0.307701	2.47342e-09
C3AR1	12p13.31	0.30761	2.50176e-09
BLOC1S3	19q13.32	0.307609	2.50208e-09
KIFC3	16q21	0.307572	2.51342e-09
LRP12	8q22.3	0.307426	2.55961e-09
NR0B1	Xp21.2	0.307172	2.64198e-09
POSTN	13q13.3	0.307019	2.69286e-09
NPM1	5q35.1	0.307015	2.69395e-09
KCNMB3	3q26.32	0.306931	2.7225e-09
SH3BP1	22q13.1	0.306915	2.72796e-09
RNF148	7q31.32	0.306859	2.74693e-09
ANO10	3p22.1-p21.33	0.306807	2.76459e-09
CDC45	22q11.21	0.306778	2.77477e-09
KIF4A	Xq13.1	0.306697	2.80286e-09
UBE2E2	3p24.3	0.306663	2.81453e-09
CFAP300	11q22.1	0.306646	2.82065e-09
CYBB	Xp21.1-p11.4	0.30664	2.82264e-09
GIPC1	19p13.12	0.306623	2.82869e-09
YWHAH	22q12.3	0.306617	2.83077e-09
NRG2	5q31.2	0.306531	2.86125e-09
PARVG	22q13.31	0.306515	2.86672e-09
ZSWIM4	19p13.13-p13.12	0.30648	2.87924e-09
FAM177B	1q41	0.30647	2.88292e-09
ALPI	2q37.1	0.306457	2.88752e-09
SOAT1	1q25.2	0.306416	2.90228e-09
CANT1	17q25.3	0.30637	2.91892e-09
ITGB8	7p21.1	0.306353	2.92504e-09
SRXN1	20p13	0.306241	2.96607e-09
EXOSC9	4q27	0.306237	2.96749e-09
GALNT12	9q22.33	0.306103	3.01721e-09
LEFTY1	1q42.12	0.306066	3.03132e-09
ATP1A3	19q13.2	0.306056	3.03495e-09
OPA3	19q13.32	0.306054	3.03556e-09
PUM3	9p24.2	0.305989	3.06015e-09
CDCA8	1p34.3	0.305958	3.07217e-09
RHPN1	8q24.3	0.305798	3.13358e-09
DMWD	19q13.32	0.30572	3.16377e-09
FGF11	17p13.1	0.305619	3.20381e-09
ZNF593	1p36.11	0.305417	3.28465e-09
CNOT3	19q13.42	0.305269	3.34549e-09
SAGE1	Xq26.3	0.30521	3.37002e-09
MCM10	10p13	0.305037	3.44289e-09
TRAFD1	12q24.13	0.304939	3.48458e-09
LPAR5	12p13.31	0.304857	3.52028e-09
SCPEP1	17q22	0.30481	3.54079e-09
PBX4	19p13.11	0.304738	3.57211e-09
IL17D	13q12.11	0.304634	3.61846e-09
CD248	11q13.2	0.304626	3.62204e-09
FHOD1	16q22.1	0.304587	3.63931e-09
FANCI	15q26.1	0.304587	3.63954e-09
LITAF	16p13.13	0.30449	3.68307e-09
KCNK6	19q13.2	0.304422	3.71414e-09
GINS3	16q21	0.304376	3.73551e-09
SGSH	17q25.3	0.304317	3.76259e-09
APLP1	19q13.12	0.304278	3.78083e-09
CCRL2	3p21.31	0.304245	3.79623e-09
CTTN	11q13.3	0.304215	3.81008e-09
UNC13A	19p13.11	0.304206	3.8141e-09
PARP8	5q11.1	0.304148	3.84158e-09
QPCT	2p22.2	0.303946	3.93822e-09
USH1C	11p15.1	0.303935	3.94353e-09
ILF2	1q21.3	0.303849	3.98546e-09
FAM124A	13q14.3	0.303796	4.01151e-09
GRK6	5q35.3	0.303643	4.08793e-09
KRT18	12q13.13	0.303626	4.09646e-09
ZSCAN20	1p35.1	0.303568	4.12548e-09
OTUB1	11q13.1	0.3035	4.16011e-09
COMMD9	11p13	0.303396	4.21365e-09
TIGD5	8q24.3	0.303385	4.21964e-09
POLR2H	3q27.1	0.303335	4.24556e-09
MACC1	7p21.1	0.303321	4.25283e-09
TMEM91	19q13.2	0.303206	4.31321e-09
NKX2-8	14q13.3	0.303072	4.38457e-09
NFATC1	18q23	0.302924	4.46474e-09
DOK2	8p21.3	0.302889	4.48405e-09
NACC1	19p13.13	0.302813	4.52592e-09
EIF4EBP1	8p11.23	0.302725	4.5748e-09
NUDT11	Xp11.22	0.30271	4.58353e-09
FPR1	19q13.41	0.302587	4.65309e-09
SVBP	1p34.2	0.302567	4.66451e-09
PCNX2	1q42.2	0.302505	4.69989e-09
HIGD2A	5q35.2	0.302493	4.70684e-09
TMEM229B	14q24.1	0.302446	4.73402e-09
LRRC23	12p13.31	0.302325	4.80451e-09
TMEM8A	16p13.3	0.302159	4.90307e-09
GPBAR1	2q35	0.3021	4.93817e-09
LINC00937	12p13.31	0.302037	4.9767e-09
RRAGD	6q15	0.30198	5.01145e-09
MYBPC3	11p11.2	0.30191	5.0543e-09
LOC606724	16p11.2	0.30179	5.12906e-09
GRIN1	9q34.3	0.30176	5.14744e-09
RNF7	3q23	0.301752	5.15277e-09
CENPP	9q22.31	0.301733	5.16433e-09
VMA21	Xq28	0.301622	5.23488e-09
MRPL52	14q11.2	0.301608	5.24408e-09
PDLIM4	5q31.1	0.301549	5.28194e-09
FAAP24	19q13.11	0.301497	5.31525e-09
CLECL1	12p13.31	0.301363	5.40296e-09
PRNP	20p13	0.301302	5.443e-09
TSR3	16p13.3	0.301244	5.48167e-09
TSEN54	17q25.1	0.301243	5.48252e-09
MYL4	17q21.32	0.301216	5.50059e-09
TTLL1	22q13.2	0.301201	5.5104e-09
CTSV	9q22.33	0.301187	5.51985e-09
SLC26A10	12q13.3	0.301161	5.53711e-09
NCF1C	7q11.23	0.301131	5.55746e-09
FUBP1	1p31.1	0.301098	5.58001e-09
CCR10	17q21.2	0.301023	5.63095e-09
CAVIN3	11p15.4	0.300936	5.69073e-09
HTR3A	11q23.2	0.300812	5.77724e-09
EPB41L3	18p11.31	0.300807	5.78095e-09
OBP2A	9q34.3	0.300805	5.78233e-09
HSPE1	2q33.1	0.300794	5.78999e-09
TRPC2	11p15.4	0.300727	5.83781e-09
EPRS	1q41	0.300607	5.92341e-09
FABP3	1p35.2	0.300559	5.95811e-09
ULBP1	6q25.1	0.300554	5.96141e-09
ZNF860	3p23-p22.3	0.300442	6.04293e-09
AKIP1	11p15.4	0.300434	6.04883e-09
CCR3	3p21.31	0.300398	6.07547e-09
RUVBL2	19q13.33	0.300149	6.2618e-09
TRPM4	19q13.33	0.300124	6.28096e-09
TSTA3	8q24.3	0.299997	6.37844e-09
RPS2P32	7p15.3	0.299995	6.37934e-09
RCN1	11p13	0.299991	6.38301e-09
TLL2	10q24.1	0.299987	6.38609e-09
PTPN7	1q32.1	0.299987	6.38619e-09
YBX3P1	16p11.2	0.29996	6.40679e-09
SELENON	1p36.11	0.299911	6.44517e-09
NCBP2	3q29	0.299885	6.46568e-09
GABRD	1p36.33	0.29986	6.48525e-09
ALDH3B2	11q13.2	0.2998	6.53187e-09
RABAC1	19q13.2	0.299756	6.56695e-09
NTS	12q21.31	0.29974	6.5801e-09
CATSPERZ	11q13.1	0.299712	6.60237e-09
SLC22A18AS	11p15.4	0.299709	6.60436e-09
FAM81B	5q15	0.29969	6.61969e-09
TMEM86A	11p15.1	0.299639	6.66042e-09
GPR132	14q32.33	0.29957	6.71662e-09

## Sheet: FBP1 correlated molecules
Supplementary Table 5
Genes correlated to ALDOA and FBP1 expression of LIHC in the TCGA (Firehose Legacy dataset).
Correlated Gene	Cytoband	Spearman's Correlation	p-Value
UBE2C	20q13.12	-0.299584	6.70534e-09
SPEF1	20p13	-0.299768	6.55727e-09
WWC3	Xp22.2	-0.299845	6.49637e-09
FAM171A2	17q21.31	-0.299867	6.47942e-09
TKT	3p21.1	-0.299901	6.4524e-09
ZMIZ2	7p13	-0.299931	6.42932e-09
PVT1	8q24.21	-0.300067	6.32428e-09
ACBD3	1q42.12	-0.30009	6.30687e-09
DNAAF4	15q21.3	-0.300109	6.29232e-09
PAXIP1	7q36.2	-0.300211	6.21452e-09
ZNF343	20p13	-0.300213	6.21297e-09
LHFPL3-AS2	7q22.2-q22.3	-0.300221	6.2074e-09
TBX19	1q24.2	-0.300253	6.18339e-09
SASS6	1p21.2	-0.300271	6.16971e-09
YTHDF1	20q13.33	-0.300308	6.14224e-09
B3GALNT2	1q42.3	-0.300582	5.94157e-09
TNPO1	5q13.2	-0.300683	5.86888e-09
PROSER1	13q13.3	-0.300758	5.81538e-09
RNF2	1q25.3	-0.300898	5.71731e-09
ZNF841	19q13.41	-0.300918	5.7032e-09
IQCE	7p22.3	-0.300994	5.651e-09
CCNA2	4q27	-0.301038	5.62102e-09
CDC45	22q11.21	-0.301048	5.61434e-09
MTR	1q43	-0.301145	5.54849e-09
COL7A1	3p21.31	-0.301168	5.53288e-09
DTD1	20p11.23	-0.301184	5.52215e-09
CKS1B	1q21.3	-0.301202	5.50954e-09
DMBX1	1p33	-0.301213	5.5027e-09
SNRPB	20p13	-0.301232	5.48991e-09
MRGBP	20q13.33	-0.301275	5.4611e-09
NHLH2	1p13.1	-0.301428	5.36016e-09
TRIM71	3p22.3	-0.301496	5.3157e-09
IFT172	2p23.3	-0.301531	5.29347e-09
CACNG4	17q24.2	-0.301536	5.29023e-09
CEP290	12q21.32	-0.301694	5.18927e-09
PRR14L	22q12.2	-0.301699	5.18618e-09
MMP1	11q22.2	-0.301722	5.17148e-09
GPN1	2p23.3	-0.301826	5.10626e-09
ZNF512	2p23.3	-0.301839	5.09825e-09
ZSCAN30	18q12.2	-0.301883	5.0708e-09
KIN	10p14	-0.301912	5.05316e-09
INTS3	1q21.3	-0.30196	5.02358e-09
AACSP1	5q35.3	-0.30196	5.0234e-09
GPSM2	1p13.3	-0.302015	4.98962e-09
APCDD1	18p11.22	-0.302036	4.97741e-09
TRIB2	2p24.3	-0.302066	4.95883e-09
AAK1	2p13.3	-0.302127	4.92212e-09
UIMC1	5q35.2	-0.302237	4.8563e-09
SLC16A3	17q25.3	-0.302239	4.85538e-09
LSP1P5	1q21.1	-0.30225	4.84867e-09
DBN1	5q35.3	-0.302317	4.8092e-09
SH2D5	1p36.12	-0.302358	4.78507e-09
EIF2D	1q32.1	-0.302424	4.74639e-09
PIMREG	17p13.2	-0.302455	4.72864e-09
RBM15B	3p21.2	-0.302466	4.72256e-09
PTPRG	3p14.2	-0.302531	4.68481e-09
HSF2BP	21q22.3	-0.302535	4.68257e-09
ARHGAP11A	15q13.3	-0.302812	4.52649e-09
DCTN5	16p12.2	-0.302864	4.4975e-09
DIRAS2	9q22.2	-0.302918	4.46834e-09
POGZ	1q21.3	-0.30297	4.4399e-09
UTP14A	Xq26.1	-0.303136	4.35024e-09
PIGG	4p16.3	-0.303153	4.3412e-09
KSR1	17q11.2	-0.303165	4.3349e-09
SNORD116-28	15q11.2	-0.303169	4.33285e-09
SLC38A1	12q13.11	-0.303338	4.24382e-09
CACNA1E	1q25.3	-0.303385	4.21946e-09
BIRC5	17q25.3	-0.303463	4.17907e-09
SLC6A14	Xq23	-0.303473	4.174e-09
MINK1	17p13.2	-0.303538	4.14097e-09
CCDC6	10q21.2	-0.303566	4.12647e-09
CCDC34	11p14.1	-0.303568	4.12543e-09
GPC2	7q22.1	-0.303575	4.12227e-09
TCF20	22q13.2|22q13.3	-0.303578	4.12048e-09
ZNF587	19q13.43	-0.30358	4.11944e-09
SRRT	7q22.1	-0.303613	4.10281e-09
DLGAP4	20q11.23	-0.303706	4.05653e-09
GAD1	2q31.1	-0.303766	4.02649e-09
ZNHIT6	1p22.3	-0.303787	4.0162e-09
TEDDM1	1q25.3	-0.303838	3.99081e-09
ANKRD11	16q24.3	-0.303885	3.96811e-09
NIF3L1	2q33.1	-0.303902	3.95958e-09
MKI67	10q26.2	-0.303966	3.92888e-09
DTNBP1	6p22.3	-0.303996	3.91424e-09
PFKFB4	3p21.31	-0.304051	3.88781e-09
YWHAQ	2p25.1	-0.30426	3.78926e-09
GRPEL2	5q32	-0.304309	3.76605e-09
FANCE	6p21.31	-0.304363	3.74119e-09
FAM72B	1p11.2	-0.304588	3.63885e-09
FLJ42627	16p13.3	-0.304589	3.63873e-09
CLSPN	1p34.3	-0.304602	3.63271e-09
PACC1	1q32.3	-0.304648	3.61194e-09
HAUS3	4p16.3	-0.304891	3.50556e-09
CENPO	2p23.3	-0.30496	3.47571e-09
PTGES2-AS1	9q34.11	-0.304963	3.47445e-09
E2F3	6p22.3	-0.305169	3.38733e-09
CASC15	6p22.3	-0.30519	3.37848e-09
SRCAP	16p11.2	-0.305196	3.37593e-09
ZBTB41	1q31.3	-0.305335	3.31847e-09
KIF5A	12q13.3	-0.305363	3.30683e-09
SEC23B	20p11.23	-0.305372	3.3032e-09
RAB3GAP1	2q21.3	-0.305409	3.28821e-09
CDCA2	8p21.2	-0.305419	3.28392e-09
ATXN7L2	1p13.3	-0.305504	3.24962e-09
SSR1	6p24.3	-0.305629	3.19974e-09
PIFO	1p13.2	-0.305644	3.19395e-09
CENPK	5q12.3	-0.305702	3.17093e-09
XRN2	20p11.22	-0.305721	3.16337e-09
SNHG3	1p35.3	-0.305829	3.12142e-09
E2F5	8q21.2	-0.305876	3.10337e-09
RALA	7p14.1	-0.305973	3.0662e-09
CYREN	7q33	-0.306124	3.00934e-09
IGF2BP2	3q27.2	-0.306132	3.0066e-09
MCRS1	12q13.12	-0.306202	2.9803e-09
FMN2	1q43	-0.306205	2.97941e-09
ZNF703	8p11.23	-0.306206	2.97886e-09
DLL3	19q13.2	-0.306263	2.95804e-09
DQX1	2p13.1	-0.306266	2.95683e-09
NUP160	11p11.2	-0.306337	2.93106e-09
HMGXB3	5q32	-0.306472	2.88224e-09
SOX11	2p25.2	-0.306479	2.87991e-09
DIAPH3	13q21.2	-0.306587	2.84132e-09
BCOR	Xp11.4	-0.306775	2.77575e-09
OR12D2	6p22.1	-0.306911	2.72926e-09
PABPC3	13q12.13	-0.306915	2.72787e-09
STAU2	8q21.11	-0.306919	2.72665e-09
DENND5A	11p15.4	-0.306984	2.70466e-09
ALDOA	16p11.2	-0.307098	2.66658e-09
DHX15	4p15.2	-0.307102	2.66513e-09
PKNOX1	21q22.3	-0.307133	2.65491e-09
DNMT3B	20q11.21	-0.307139	2.65279e-09
GS1-124K5.11	7q11.21	-0.307315	2.59521e-09
HECTD2	10q23.32	-0.307376	2.57566e-09
OTUD3	1p36.13	-0.307506	2.53422e-09
HS6ST2	Xq26.2	-0.307556	2.51842e-09
AP3B1	5q14.1	-0.307582	2.51036e-09
CA5B	Xp22.2	-0.307691	2.47644e-09
UNC119B	12q24.31	-0.307701	2.47354e-09
CALHM3	10q24.33	-0.307725	2.46609e-09
TTC30B	2q31.2	-0.307797	2.44384e-09
RNF4	4p16.3	-0.30781	2.44007e-09
CYP2W1	7p22.3	-0.307848	2.42831e-09
OSBP2	22q12.2	-0.307863	2.42375e-09
ELK4	1q32.1	-0.307937	2.40152e-09
ANKLE2	12q24.33	-0.307946	2.39882e-09
HS3ST5	6q21-q22.1	-0.307951	2.39751e-09
GDF1	19p13.11	-0.308006	2.38111e-09
GATAD2B	1q21.3	-0.308037	2.37177e-09
CDCA5	11q13.1	-0.308064	2.36394e-09
SETD1A	16p11.2	-0.30813	2.34442e-09
ANKRD40	17q21.33	-0.308143	2.34058e-09
SAFB2	19p13.3	-0.308185	2.32835e-09
TMEM109	11q12.2	-0.30819	2.327e-09
FAM193A	4p16.3	-0.30822	2.31804e-09
ZNF273	7q11.21	-0.308243	2.31141e-09
CRYBG2	1p36.11	-0.308284	2.29959e-09
BRIX1	5p13.2	-0.308328	2.28702e-09
ASAP2	2p25.1|2p24	-0.308479	2.2443e-09
AGO2	8q24.3	-0.308481	2.2438e-09
PHF12	17q11.2	-0.308689	2.18618e-09
ZBED8	5q33.3	-0.308913	2.12547e-09
EP400	12q24.33	-0.30908	2.08142e-09
SMG8	17q22	-0.309154	2.06228e-09
MYRF	11q12.2	-0.309157	2.06161e-09
SUPT16H	14q11.2	-0.309161	2.06055e-09
ABCA11P	4p16.3	-0.309178	2.05623e-09
SPDL1	5q35.1	-0.309192	2.05245e-09
IPO9	1q32.1	-0.30922	2.04538e-09
PDCL	9q33.2	-0.30922	2.04518e-09
SKA1	18q21.1	-0.309224	2.04419e-09
HPDL	1p34.1	-0.309244	2.0391e-09
MTF2	1p22.1	-0.309288	2.02796e-09
SCRIB	8q24.3	-0.309328	2.01783e-09
NCSTN	1q23.2	-0.309368	2.00757e-09
TMC2	20p13	-0.309421	1.99447e-09
UBFD1	16p12.2	-0.309577	1.95566e-09
TAF1D	11q21	-0.309621	1.94494e-09
POLQ	3q13.33	-0.309669	1.9331e-09
DBNDD2	20q13.12	-0.309676	1.93153e-09
S100PBP	1p35.1	-0.309712	1.92269e-09
SUZ12P1	17q11.2	-0.309724	1.91995e-09
DUSP12	1q23.3	-0.309858	1.88775e-09
GORASP2	2q31.1	-0.310047	1.8435e-09
RCN2	15q24.3	-0.310182	1.81225e-09
PHF1	6p21.32	-0.310284	1.78933e-09
CCT3	1q22	-0.310308	1.78389e-09
MZT1	13q21.33	-0.310314	1.78238e-09
JRKL	11q21	-0.310432	1.75618e-09
TEAD3	6p21.31	-0.31049	1.74341e-09
QPCT	2p22.2	-0.310501	1.74104e-09
PEA15	1q23.2	-0.310502	1.74076e-09
NUP188	9q34.11	-0.31051	1.73906e-09
FAM53B	10q26.13	-0.310521	1.73664e-09
FANCF	11p14.3	-0.310682	1.70162e-09
MED24	17q21.1	-0.310747	1.68782e-09
CDK2	12q13.2	-0.310877	1.66032e-09
IPO4	14q12	-0.310897	1.65606e-09
INGX	Xq13.1	-0.310955	1.64403e-09
SUPT7L	2p23.3	-0.311056	1.62325e-09
FBRS	16p11.2	-0.311123	1.6096e-09
NOL11	17q24.2	-0.311216	1.59061e-09
RBM34	1q42.3	-0.311274	1.57912e-09
WDR62	19q13.12	-0.311287	1.57645e-09
SLC41A3	3q21.2-q21.3	-0.31135	1.56399e-09
NUP210	3p25.1	-0.311429	1.54836e-09
DDX52	17q12	-0.311485	1.53742e-09
WDR35	2p24.1	-0.311565	1.52206e-09
PCLAF	15q22.31	-0.311575	1.52003e-09
TOPBP1	3q22.1	-0.311615	1.51233e-09
PPAT	4q12	-0.311806	1.47617e-09
RAB35	12q24.23	-0.311975	1.44494e-09
ENC1	5q13.3	-0.312109	1.42068e-09
LRRC1	6p12.1	-0.312154	1.4125e-09
TMEM52B	12p13.2	-0.312202	1.40393e-09
PDE7A	8q13.1	-0.312289	1.3886e-09
LASP1	17q12	-0.312299	1.3867e-09
NUP133	1q42.13	-0.312539	1.34521e-09
RUFY2	10q21.3	-0.312616	1.33204e-09
POLR2B	4q12	-0.31266	1.3247e-09
ZNF516	18q23	-0.312806	1.3002e-09
BRCA1	17q21.31	-0.313021	1.26516e-09
HNRNPA3	2q31.2	-0.313025	1.2645e-09
EIF2S3	Xp22.11	-0.31303	1.26375e-09
BMPR1A	10q23.2	-0.313174	1.24071e-09
GCNT3	15q22.2	-0.313178	1.24009e-09
KMT5C	19q13.42	-0.313285	1.22343e-09
TRIM17	1q42.13	-0.313319	1.21802e-09
NUP205	7q33	-0.313341	1.21472e-09
CBL	11q23.3	-0.313364	1.21107e-09
SH2B2	7q22.1	-0.31344	1.19949e-09
FBXO46	19q13.32	-0.313509	1.189e-09
GAGE12D	Xp11.23	-0.313612	1.17347e-09
RAN	12q24.33	-0.313692	1.16143e-09
DDX1	2p24.3	-0.313724	1.15672e-09
DDX23	12q13.12	-0.313988	1.1184e-09
PIGS	17q11.2	-0.31402	1.11385e-09
ATAD5	17q11.2	-0.314045	1.11038e-09
STK25	2q37.3	-0.314057	1.10863e-09
CHAF1B	21q22.12-q22.13	-0.3142	1.08859e-09
TSC1	9q34.13	-0.314244	1.08248e-09
CENPH	5q13.2	-0.314246	1.0822e-09
SLC35B2	6p21.1	-0.314408	1.05997e-09
GON4L	1q22	-0.31442	1.0584e-09
MFSD2B	2p23.3	-0.31453	1.04353e-09
NUTM2A-AS1	10q23.2	-0.314599	1.03436e-09
CTBP1-DT	4p16.3	-0.314629	1.03038e-09
ACACA	17q12	-0.314675	1.02433e-09
ATP9A	20q13.2	-0.314678	1.02396e-09
BRD7	16q12.1	-0.314701	1.02099e-09
GMIP	19p13.11	-0.314714	1.01931e-09
DDX46	5q31.1	-0.31477	1.01202e-09
SKA3	13q12.11	-0.314932	9.91191e-10
WASHC5	8q24.13	-0.315298	9.45673e-10
ZNF384	12p13.31	-0.315439	9.28806e-10
DTL	1q32.3	-0.31554	9.16826e-10
SIX2	2p21	-0.315566	9.13689e-10
DNAJC14	12q13.2	-0.315628	9.06492e-10
ZNF239	10q11.21	-0.31567	9.01632e-10
ZNF514	2q11.1	-0.315728	8.9488e-10
C18ORF54	18q21.2	-0.315776	8.89449e-10
CEMIP2	9q21.13	-0.315842	8.81923e-10
KTN1-AS1	14q22.3	-0.315844	8.8166e-10
SMCR8	17p11.2	-0.315878	8.77761e-10
NUDCD1	8q23.1	-0.315901	8.7518e-10
PGS1	17q25.3	-0.315909	8.74283e-10
PPM1G	2p23.3	-0.315942	8.70645e-10
DKKL1	19q13.33	-0.315956	8.6908e-10
CENPL	1q25.1	-0.316006	8.63483e-10
ZNF124	1q44	-0.316206	8.41512e-10
PRKDC	8q11.21	-0.316248	8.37008e-10
TES	7q31.2	-0.316295	8.31894e-10
CSNK1E	22q13.1	-0.316384	8.22491e-10
XYLT2	17q21.33	-0.316394	8.2144e-10
CTTN	11q13.3	-0.316404	8.20286e-10
ANKS3	16p13.3	-0.3165	8.10231e-10
GYG1	3q24	-0.316837	7.75819e-10
RPIA	2p11.2	-0.316842	7.75276e-10
DLX6-AS1	7q21.3	-0.316849	7.7455e-10
EIF3E	8q23.1	-0.316858	7.7371e-10
ZBED4	22q13.33	-0.316896	7.69917e-10
RRP12	10q24.1	-0.316962	7.63322e-10
TMEM185B	2q14.2	-0.317084	7.51371e-10
MED17	11q21	-0.317202	7.40019e-10
GAL3ST1	22q12.2	-0.317267	7.33879e-10
ENOPH1	4q21.22	-0.317377	7.23447e-10
NUP43	6q25.1	-0.31742	7.19511e-10
NUP155	5p13.2	-0.31747	7.14881e-10
IGF2BP1	17q21.32	-0.31749	7.12991e-10
NRP1	10p11.22	-0.317506	7.11487e-10
SYNRG	17q12	-0.317562	7.06413e-10
LUC7L3	17q21.33	-0.31761	7.01975e-10
DLEU7	13q14.3	-0.317695	6.94361e-10
HHIPL2	1q41	-0.317715	6.9249e-10
NAA25	12q24.13	-0.317861	6.79571e-10
ZNF7	8q24.3	-0.317907	6.75507e-10
ARHGAP26	5q31.3	-0.317929	6.73582e-10
VPS26A	10q22.1	-0.318086	6.60032e-10
ASNS	7q21.3	-0.31828	6.43613e-10
LOC100134368	16p13.3	-0.318544	6.21926e-10
POP1	8q22.2	-0.318604	6.17069e-10
DYNC2LI1	2p21	-0.31867	6.11812e-10
TROAP	12q13.12	-0.318933	5.91254e-10
SMARCB1	22q11.23|22q11	-0.318952	5.89792e-10
MED25	19q13.33	-0.318993	5.86682e-10
C5ORF34	5p12	-0.319115	5.77416e-10
KIF20B	10q23.31	-0.319196	5.7133e-10
ZNF71	19q13.43	-0.319223	5.69324e-10
TDG	12q23.3	-0.319244	5.67782e-10
TEX19	17q25.3	-0.319273	5.65659e-10
ATP6V1C1	8q22.3	-0.319336	5.61012e-10
THOC2	Xq25	-0.319398	5.56555e-10
CACYBP	1q25.1	-0.319418	5.55083e-10
SUMO2	17q25.1	-0.319419	5.54972e-10
MGC57346	17q21.31	-0.319433	5.54024e-10
RCOR2	11q13.1	-0.31963	5.39908e-10
DBIL5P	17p13.3	-0.319689	5.35792e-10
ARID2	12q12	-0.319708	5.34441e-10
RAD51	15q15.1	-0.319808	5.27562e-10
SUPT5H	19q13.2	-0.319865	5.23663e-10
RAI1	17p11.2	-0.320189	5.01942e-10
PTPN12	7q11.23	-0.320197	5.01402e-10
ZNF740	12q13.13	-0.320361	4.90777e-10
MCM3AP-AS1	21q22.3	-0.320364	4.90598e-10
SOCS5	2p21	-0.320475	4.83484e-10
C10ORF88	10q26.13	-0.320533	4.79837e-10
STK36	2q35	-0.320588	4.76393e-10
KMT5A	12q24.31	-0.320681	4.70653e-10
C4ORF48	4p16.3	-0.320852	4.60253e-10
SGSH	17q25.3	-0.320855	4.60072e-10
ABRAXAS1	4q21.23	-0.32086	4.59762e-10
KPNA2	17q24.2	-0.320897	4.57536e-10
SMC3	10q25.2	-0.320909	4.56812e-10
PRAME	22q11.22	-0.320989	4.52064e-10
ISG20L2	1q23.1	-0.321037	4.49222e-10
MPV17	2p23.3	-0.321037	4.49207e-10
TMEM65	8q24.13	-0.321075	4.4697e-10
SLC7A5P2	16p12.2	-0.321106	4.45184e-10
USP14	18p11.32	-0.321188	4.40386e-10
SH3D21	1p34.3	-0.321232	4.37882e-10
SNRPN	15q11.2	-0.321288	4.34657e-10
PTBP3	9q32	-0.321593	4.17621e-10
FOXM1	12p13.33	-0.321771	4.07939e-10
CWC22	2q31.3	-0.321865	4.02906e-10
HOXC13	12q13.13	-0.321953	3.98302e-10
GAS5	1q25.1	-0.321957	3.98084e-10
CHTOP	1q21.3	-0.322078	3.91789e-10
ZNF710	15q26.1	-0.3221	3.90637e-10
MTCH1	6p21.2	-0.322252	3.82923e-10
METTL3	14q11.2	-0.322326	3.79218e-10
MGME1	20p11.23	-0.322339	3.78576e-10
SCRN1	7p14.3	-0.322353	3.77859e-10
DCTN1	2p13.1	-0.322355	3.77756e-10
TMEM69	1p34.1	-0.322477	3.71724e-10
PKMYT1	16p13.3	-0.322613	3.65116e-10
C1ORF216	1p34.3	-0.322692	3.61344e-10
CHTF18	16p13.3	-0.322725	3.59755e-10
POLG2	17q23.3	-0.322757	3.58245e-10
ZHX2	8q24.13	-0.32276	3.58111e-10
SMNDC1	10q25.2	-0.322817	3.55447e-10
DENR	12q24.31	-0.322871	3.52898e-10
THUMPD3-AS1	3p25.3	-0.3229	3.51571e-10
FAM219B	15q24.1-q24.2	-0.323182	3.38711e-10
C19ORF48	19q13.33	-0.323379	3.29993e-10
RBM19	12q24.13-q24.21	-0.323406	3.28839e-10
SSRP1	11q12.1	-0.323469	3.2612e-10
SLC7A1	13q12.3	-0.32352	3.23909e-10
FANCI	15q26.1	-0.323575	3.21569e-10
CCDC40	17q25.3	-0.323735	3.1482e-10
DCP1A	3p21.1	-0.323788	3.1263e-10
ZNF286A	17p12	-0.323918	3.07301e-10
VIRMA	8q22.1	-0.323958	3.05657e-10
SPP1	4q22.1	-0.324007	3.03663e-10
BORA	13q21.33	-0.324267	2.93381e-10
TLCD3A	17p13.3	-0.324284	2.92739e-10
RAPGEFL1	17q21.1	-0.324401	2.8822e-10
NT5DC2	3p21.1	-0.324416	2.8765e-10
METAP1	4q23	-0.324473	2.85458e-10
DRP2	Xq22.1	-0.324489	2.84861e-10
ATP7A	Xq21.1	-0.324578	2.81508e-10
ASH1L-AS1	1q22	-0.324688	2.7745e-10
RGL2	6p21.32	-0.324798	2.73405e-10
CDK6	7q21.2	-0.325003	2.66068e-10
CSTF2	Xq22.1	-0.32505	2.64407e-10
RNF220	1p34.1	-0.325101	2.6263e-10
ATF1	12q13.12	-0.325183	2.5976e-10
AGAP1	2q37.2	-0.325208	2.5889e-10
SUPT20H	13q13.3	-0.325302	2.55683e-10
ZNF432	19q13.41	-0.325346	2.54197e-10
PRPF40A	2q23.3	-0.325377	2.53138e-10
ZNF461	19q13.12	-0.325503	2.48932e-10
SFSWAP	12q24.33	-0.325596	2.45861e-10
ARID3A	19p13.3	-0.32566	2.43771e-10
XXYLT1	3q29	-0.325668	2.4352e-10
NAE1	16q22.1	-0.325768	2.40292e-10
PRR11	17q22	-0.325779	2.39927e-10
GMEB1	1p35.3	-0.325832	2.38232e-10
TMEM44	3q29	-0.325851	2.37636e-10
ARHGEF2	1q22	-0.32588	2.36732e-10
GTF3C3	2q33.1	-0.325917	2.35565e-10
TMEM51-AS1	1p36.21	-0.326085	2.30316e-10
STK3	8q22.2	-0.326173	2.27627e-10
PTK2	8q24.3	-0.326176	2.27541e-10
ENO2	12p13.31	-0.32622	2.26216e-10
SHC1	1q21.3	-0.326244	2.25502e-10
DAGLA	11q12.2	-0.326331	2.22866e-10
NSD1	5q35.3	-0.326376	2.21544e-10
MYBBP1A	17p13.2	-0.32645	2.19376e-10
SOGA1	20q11.23	-0.326519	2.17348e-10
FAM72D	1q21.1	-0.326725	2.11452e-10
WDR37	10p15.3	-0.326796	2.09431e-10
VPS35	16q11.2	-0.326882	2.07027e-10
ARHGAP1	11p11.2	-0.326892	2.06757e-10
PRMT3	11p15.1	-0.327007	2.03607e-10
TMEM237	2q33.1	-0.327007	2.03604e-10
PPP4R1	18p11.22	-0.327152	1.99683e-10
SPC25	2q24.3	-0.327159	1.99491e-10
R3HDM1	2q21.3	-0.327186	1.9877e-10
FER1L4	20q11.22	-0.327228	1.97658e-10
KNTC1	12q24.31	-0.32731	1.95499e-10
SNRNP200	2q11.2	-0.327348	1.94496e-10
NPC1	18q11.2	-0.327442	1.92055e-10
NFRKB	11q24.3	-0.327451	1.91843e-10
IPO7	11p15.4	-0.327456	1.9171e-10
CEP131	17q25.3	-0.327529	1.8984e-10
CEP95	17q23.3	-0.327668	1.86319e-10
SOX9	17q24.3	-0.327684	1.85913e-10
MYLIP	6p22.3	-0.327837	1.82135e-10
DSCC1	8q24.12	-0.32786	1.81576e-10
SNX27	1q21.3	-0.327869	1.81363e-10
C6ORF223	6p21.1	-0.327979	1.78687e-10
TPX2	20q11.21	-0.328289	1.714e-10
WDSUB1	2q24.2	-0.328318	1.70724e-10
TRAF5	1q32.3	-0.328321	1.70665e-10
CTSV	9q22.33	-0.328341	1.70201e-10
CLK2	1q22	-0.328508	1.66421e-10
USP3	15q22.31	-0.328521	1.66127e-10
DYNC1I2	2q31.1	-0.328541	1.65678e-10
PRDM4	12q23.3	-0.328595	1.64477e-10
COG1	17q25.1	-0.328618	1.63976e-10
HNRNPA1P33	10q11.22	-0.328748	1.61113e-10
ANKS1A	6p21.31	-0.328755	1.60967e-10
SPINDOC	11q13.1	-0.328852	1.58865e-10
ABCC1	16p13.11	-0.328958	1.56609e-10
ADORA1	1q32.1	-0.328975	1.56254e-10
SERPINI1	3q26.1	-0.328995	1.55844e-10
SNHG1	11q12.3	-0.329038	1.54938e-10
ZNF581	19q13.42	-0.329069	1.54289e-10
XPO6	16p12.1	-0.329077	1.54128e-10
KIAA1549	7q34	-0.329153	1.52552e-10
ZNF775	7q36.1	-0.329195	1.51679e-10
MMD	17q22	-0.32923	1.5096e-10
CCDC86	11q12.2	-0.32931	1.49347e-10
MAPKAPK5	12q24.12-q24.13	-0.329312	1.49295e-10
KIF14	1q32.1	-0.329333	1.48891e-10
KBTBD2	7p14.3	-0.329362	1.48302e-10
TRAIP	3p21.31	-0.329445	1.46651e-10
PRC1	15q26.1	-0.329569	1.44208e-10
STX1A	7q11.23	-0.329633	1.42964e-10
UXS1	2q12.2	-0.329699	1.41701e-10
MTMR2	11q21	-0.329729	1.41111e-10
POLDIP3	22q13.2	-0.329756	1.40596e-10
SACS	13q12.12	-0.329797	1.3982e-10
CDK1	10q21.2	-0.329878	1.38299e-10
ZNF526	19q13.2	-0.330023	1.35613e-10
GEMIN5	5q33.2	-0.330057	1.34991e-10
MMP12	11q22.2	-0.330154	1.33231e-10
GNPAT	1q42.2	-0.330267	1.31195e-10
TMEM132A	11q12.2	-0.330522	1.26741e-10
SMOX	20p13	-0.330606	1.25306e-10
HNRNPM	19p13.2	-0.330708	1.23577e-10
RTL10	22q11.21	-0.330775	1.22455e-10
RAD54L	1p34.1	-0.330943	1.19688e-10
SPATA5	4q28.1	-0.330979	1.19116e-10
CBFA2T2	20q11.21-q11.22	-0.330982	1.19057e-10
ETV5	3q27.2	-0.331077	1.17527e-10
DBF4	7q21.12	-0.33114	1.16532e-10
PPHLN1	12q12	-0.331188	1.15776e-10
SMYD2	1q32.3	-0.331237	1.15008e-10
BLOC1S3	19q13.32	-0.331287	1.14222e-10
ORC6	16q11.2	-0.331374	1.12882e-10
XRCC6	22q13.2	-0.331377	1.12831e-10
LIX1	5q15	-0.331452	1.11683e-10
PIP4P2	8q21.3	-0.331453	1.11663e-10
STIL	1p33	-0.33153	1.10505e-10
ZBTB34	9q33.3	-0.33153	1.105e-10
DLX2	2q31.1	-0.331583	1.09706e-10
ZNF213	16p13.3	-0.331678	1.08299e-10
RIC8A	11p15.5	-0.331716	1.07739e-10
MOB3A	19p13.3	-0.331948	1.04384e-10
DLX6	7q21.3	-0.332025	1.03299e-10
RPS6KC1	1q32.3	-0.332041	1.03062e-10
SNHG20	17q25.2	-0.332104	1.0218e-10
CBX2	17q25.3	-0.332289	9.96385e-11
WASHC2C	10q11.22	-0.332423	9.78343e-11
IARS	9q22.31	-0.332654	9.47898e-11
GPR119	Xq26.1	-0.332679	9.44604e-11
SMG5	1q22	-0.33282	9.2656e-11
HNRNPA0	5q31.2	-0.333008	9.03014e-11
CASKIN1	16p13.3	-0.333019	9.01684e-11
CCNB2	15q22.2	-0.333043	8.98666e-11
IFNGR2	21q22.11	-0.333048	8.9816e-11
HAUS5	19q13.12	-0.333117	8.89687e-11
FAM163A	1q25.2	-0.333224	8.76664e-11
RYK	3q22.2	-0.333235	8.75379e-11
C17ORF75	17q11.2	-0.333268	8.71407e-11
CKAP4	12q23.3	-0.333355	8.61113e-11
HNRNPA1	12q13.13	-0.333358	8.60809e-11
CCT6A	7p11.2	-0.333421	8.53372e-11
KDM5C	Xp11.22	-0.333705	8.2073e-11
C22ORF23	22q13.1	-0.333801	8.09971e-11
PROCA1	17q11.2	-0.333831	8.06675e-11
EFCAB7	1p31.3	-0.333833	8.06381e-11
NLE1	17q12	-0.333851	8.04427e-11
SH3GL3	15q25.2	-0.333926	7.96173e-11
SNORD116-20	15q11.2	-0.334052	7.82547e-11
SVBP	1p34.2	-0.334154	7.71586e-11
KIF4A	Xq13.1	-0.334476	7.38145e-11
BAZ2A	12q13.3	-0.334527	7.33065e-11
FAM168B	2q21.1	-0.334528	7.32961e-11
KIF18B	17q21.31	-0.334572	7.28535e-11
VLDLR	9p24.2	-0.334641	7.21578e-11
GGA2	16p12.2	-0.334665	7.19225e-11
NCBP2	3q29	-0.334693	7.16452e-11
ZNF84	12q24.33	-0.334751	7.10709e-11
EZH2	7q36.1	-0.334757	7.10107e-11
ABCC5	3q27.1	-0.334963	6.9022e-11
PLEKHA8	7p14.3	-0.335022	6.84684e-11
CEP41	7q32.2	-0.335042	6.82743e-11
C20ORF204	20q13.33	-0.335081	6.7914e-11
C4ORF47	4q35.1	-0.335088	6.78456e-11
ATF6B	6p21.32	-0.335136	6.74004e-11
ATXN2	12q24.12	-0.335156	6.72164e-11
PARP1	1q42.12	-0.33517	6.70805e-11
USP46	4q12	-0.335173	6.70519e-11
JPT2	16p13.3	-0.335196	6.68404e-11
TACC3	4p16.3	-0.33531	6.57971e-11
FIGNL1	7p12.2	-0.335406	6.49354e-11
MCM2	3q21.3	-0.335435	6.46754e-11
GPATCH4	1q22-q23.1	-0.335695	6.23877e-11
CENPI	Xq22.1	-0.335891	6.0722e-11
CDC20	1p34.2	-0.335929	6.04029e-11
VASP	19q13.32	-0.335955	6.01874e-11
CRAMP1	16p13.3	-0.336206	5.8131e-11
HOMER3	19p13.11	-0.336315	5.7259e-11
RBMS1	2q24.2	-0.336367	5.68443e-11
CHD7	8q12.2	-0.336516	5.56825e-11
TRIM59	3q25.33	-0.33654	5.54961e-11
LRRC37BP1	17q11.2	-0.336583	5.51703e-11
HGS	17q25.3	-0.336767	5.37763e-11
PYCR1	17q25.3	-0.33684	5.32337e-11
UGGT1	2q14.3	-0.336878	5.29587e-11
HNRNPDL	4q21.22	-0.336948	5.24466e-11
COIL	17q22	-0.337044	5.17484e-11
LEMD2	6p21.31	-0.337079	5.14975e-11
CCDC137	17q25.3	-0.337127	5.11526e-11
PARD6G	18q23	-0.337163	5.08988e-11
ZNF8	19q13.43	-0.337239	5.03612e-11
SLC29A4	7p22.1	-0.337252	5.0273e-11
GGPS1	1q42.3	-0.337253	5.02658e-11
DYNC1H1	14q32.31	-0.337273	5.01294e-11
SERPINB1	6p25.2	-0.33728	5.0081e-11
C15ORF39	15q24.2	-0.337315	4.98379e-11
GCM1	6p12.1	-0.337362	4.95103e-11
POLR3C	1q21.1	-0.337397	4.92705e-11
RAD21	8q24.11	-0.337467	4.87897e-11
CSNK2A3	11p15.4	-0.337855	4.62274e-11
CERS5	12q13.12	-0.337916	4.58314e-11
CHORDC1	11q14.3	-0.337975	4.54615e-11
GIT1	17q11.2	-0.338035	4.50832e-11
TOP2A	17q21.2	-0.338048	4.49992e-11
MAP3K8	10p11.23	-0.338139	4.44329e-11
TTF2	1p13.1	-0.338143	4.4409e-11
NEK11	3q22.1	-0.338185	4.41484e-11
HTR1D	1p36.12	-0.338239	4.38131e-11
NCAPD3	11q25	-0.338271	4.36176e-11
PNMA1	14q24.3	-0.338354	4.31178e-11
SIX4	14q23.1	-0.338384	4.29393e-11
GDF11	12q13.2	-0.338448	4.25547e-11
PSMC3IP	17q21.2	-0.338653	4.13562e-11
CENPA	2p23.3	-0.338677	4.12166e-11
FHDC1	4q31.3	-0.338804	4.04923e-11
CYP26B1	2p13.2	-0.338878	4.00753e-11
SHCBP1	16q11.2	-0.338902	3.99368e-11
KIAA1841	2p15	-0.339119	3.87445e-11
PCGF2	17q12	-0.339161	3.85179e-11
KDM1B	6p22.3	-0.339184	3.83946e-11
RCOR3	1q32.2-q32.3	-0.339201	3.82992e-11
DSCR9	21q22.13	-0.339213	3.82389e-11
LGR5	12q21.1	-0.339276	3.79024e-11
CSNK1G1	15q22.31	-0.339388	3.73131e-11
VGLL4	3p25.3-p25.2	-0.339481	3.68307e-11
METTL6	3p25.1	-0.339489	3.67861e-11
CDCA8	1p34.3	-0.339678	3.58245e-11
ZNF765	19q13.42	-0.339747	3.54771e-11
CALM3	19q13.32	-0.340157	3.34961e-11
TLK2	17q23.2	-0.340187	3.33523e-11
CASP2	7q34	-0.340209	3.32512e-11
KCTD10	12q24.11	-0.340275	3.29459e-11
ATXN7L3B	12q21.1	-0.34033	3.26897e-11
PKN1	19p13.12	-0.340412	3.23135e-11
LOC646762	7p14.3	-0.340437	3.22015e-11
ADORA2B	17p12	-0.340452	3.21317e-11
XPNPEP1	10q25.1	-0.340476	3.2026e-11
INPPL1	11q13.4	-0.340644	3.12768e-11
HDAC11	3p25.1	-0.340741	3.08516e-11
MDK	11p11.2	-0.340805	3.05746e-11
CKAP2L	2q14.1	-0.340916	3.0103e-11
WASF2	1p36.11	-0.341056	2.95131e-11
ARL4A	7p21.3	-0.341106	2.93062e-11
ZFP64	20q13.2	-0.341279	2.85983e-11
CKAP2	13q14.3	-0.341307	2.84885e-11
DDX42	17q23.3	-0.341391	2.81497e-11
PPP1R9B	17q21.33	-0.341465	2.78595e-11
NCDN	1p34.3	-0.341746	2.6774e-11
PRMT1	19q13.33	-0.341865	2.63299e-11
XPOT	12q14.2	-0.341901	2.61962e-11
CDON	11q24.2	-0.342108	2.54392e-11
LARP1	5q33.2	-0.342179	2.51858e-11
ROBO1	3p12.3	-0.342259	2.48995e-11
UBQLN4	1q22	-0.342268	2.48687e-11
LHFPL2	5q14.1	-0.342454	2.4224e-11
USP22	17p11.2	-0.342532	2.39553e-11
B4GALNT3	12p13.33	-0.34259	2.37587e-11
SLC2A1	1p34.2	-0.342735	2.32751e-11
DESI2	1q44	-0.342896	2.2752e-11
ZNF280C	Xq26.1	-0.343298	2.14887e-11
FOXRED2	22q12.3	-0.343431	2.10872e-11
LRP8	1p32.3	-0.343491	2.09073e-11
GIP	17q21.32	-0.343495	2.08958e-11
SHLD1	20p12.3	-0.343547	2.07399e-11
TET3	2p13.1	-0.343589	2.06181e-11
XRCC2	7q36.1	-0.343704	2.02829e-11
LINC01096	4p15.33	-0.343781	2.00617e-11
ZFP69B	1p34.2	-0.343878	1.97868e-11
ATP13A2	1p36.13	-0.343895	1.97399e-11
SLC4A11	20p13	-0.344107	1.91513e-11
SLC52A2	8q24.3	-0.344214	1.88615e-11
KDM1A	1p36.12	-0.344258	1.87429e-11
AEBP2	12p12.3	-0.34433	1.85514e-11
UTP4	16q22.1	-0.344391	1.83921e-11
ANAPC7	12q24.11	-0.34446	1.82101e-11
GPR107	9q34.11	-0.344471	1.81821e-11
TUFT1	1q21.3	-0.344474	1.81754e-11
AURKB	17p13.1	-0.344489	1.81361e-11
KCTD2	17q25.1	-0.344516	1.8067e-11
ZBTB2	6q25.1	-0.344604	1.78409e-11
MASTL	10p12.1	-0.344737	1.75059e-11
DLX1	2q31.1	-0.344787	1.73812e-11
VRK2	2p16.1	-0.344799	1.73509e-11
UBE2T	1q32.1	-0.344819	1.73026e-11
GCN1	12q24.23	-0.34484	1.72499e-11
NBEAL2	3p21.31	-0.344856	1.721e-11
PIAS3	1q21.1	-0.344917	1.70607e-11
ZNF692	1q44	-0.345002	1.68556e-11
PLEKHB2	2q21.1	-0.345014	1.68258e-11
YY1AP1	1q22	-0.345079	1.66712e-11
SMARCE1	17q21.2	-0.34524	1.62916e-11
NCOA6	20q11.22	-0.345278	1.62031e-11
KDM2B	12q24.31	-0.34528	1.61966e-11
PRR5L	11p13-p12	-0.345295	1.6162e-11
STXBP4	17q22	-0.345323	1.60985e-11
MTFR2	6q23.3	-0.345338	1.60634e-11
CCNB1	5q13.2	-0.345575	1.55272e-11
RFX6	6q22.1	-0.34559	1.54952e-11
C10ORF91	10q26.3	-0.34565	1.53619e-11
STIP1	11q13.1	-0.345705	1.52414e-11
P3H4	17q21.2	-0.345905	1.48103e-11
H2AFZ	4q23	-0.346252	1.40898e-11
IKBKE	1q32.1	-0.346336	1.39222e-11
ASB1	2q37.3	-0.346469	1.36587e-11
PROSER3	19q13.12	-0.346533	1.35323e-11
ZNF550	19q13.43	-0.346706	1.32004e-11
PPP2R2C	4p16.1	-0.346862	1.29067e-11
TUBA1B	12q13.12	-0.346927	1.27873e-11
NSF	17q21.31	-0.347102	1.24688e-11
HMGN4	6p22.2	-0.347171	1.23465e-11
CHD4	12p13.31	-0.34722	1.22599e-11
HJURP	2q37.1	-0.347322	1.20808e-11
MYADML2	17q25.3	-0.347473	1.18205e-11
PLK4	4q28.1	-0.347481	1.18066e-11
SAP130	2q14.3	-0.347545	1.16976e-11
ADRA2C	4p16.3	-0.347598	1.16083e-11
PIGC	1q24.3	-0.347686	1.1462e-11
ZNF766	19q13.41	-0.348042	1.0888e-11
ZNF821	16q22.2	-0.348264	1.05439e-11
GINS1	20p11.21	-0.348601	1.0042e-11
MYO19	17q12	-0.348678	9.93072e-12
TBC1D22B	6p21.2	-0.348738	9.84488e-12
PRRC2C	1q24.3	-0.348896	9.62177e-12
CENPE	4q24	-0.348926	9.57952e-12
EME1	17q21.33	-0.348966	9.52396e-12
RPRM	2q23.3	-0.348993	9.48743e-12
PRMT2	21q22.3	-0.349304	9.06856e-12
SCMH1	1p34.2	-0.349646	8.62959e-12
CBX6	22q13.1	-0.349656	8.6167e-12
RAB42	1p35.3	-0.34968	8.5863e-12
FBXL19-AS1	16p11.2	-0.349705	8.55538e-12
FAM131A	3q27.1	-0.349726	8.52983e-12
SLC36A1	5q33.1	-0.349755	8.49367e-12
CDCA7	2q31.1	-0.349882	8.33803e-12
FIP1L1	4q12	-0.350031	8.15899e-12
MAP3K1	5q11.2	-0.350324	7.81795e-12
ORC1	1p32.3	-0.35044	7.68777e-12
EIF3D	22q12.3	-0.350467	7.65699e-12
SRPK1	6p21.31	-0.350656	7.44879e-12
OLIG3	6q23.3	-0.350726	7.37369e-12
GOLGA2P10	15q25.2	-0.350731	7.3679e-12
VPS37C	11q12.2	-0.350746	7.35188e-12
MRPS23	17q22	-0.350842	7.24912e-12
MFSD5	12q13.13	-0.350895	7.19327e-12
CCT5	5p15.2	-0.350947	7.13945e-12
CEP164	11q23.3	-0.351049	7.03377e-12
SF3A2	19p13.3	-0.351069	7.01345e-12
MCM4	8q11.21	-0.351302	6.77812e-12
BCL9	1q21.2	-0.351302	6.77812e-12
ARHGEF39	9p13.3	-0.351493	6.5913e-12
CLIP2	7q11.23	-0.351559	6.52845e-12
NUF2	1q23.3	-0.351627	6.46331e-12
IBSP	4q22.1	-0.35164	6.45112e-12
NSMAF	8q12.1	-0.351838	6.26676e-12
NCAPG	4p15.31	-0.35214	5.9957e-12
MCM10	10p13	-0.352168	5.97088e-12
KHDC4	1q22	-0.352336	5.82579e-12
SUV39H2	10p13	-0.352464	5.71772e-12
ARID4B	1q42.3	-0.352628	5.58096e-12
FOXJ1	17q25.1	-0.352726	5.50172e-12
DDR1	6p21.33	-0.352849	5.40329e-12
RAP1GAP2	17p13.3	-0.352964	5.31212e-12
COG2	1q42.2	-0.353179	5.1467e-12
EDARADD	1q42.3-q43	-0.353305	5.05268e-12
H2AFX	11q23.3	-0.35334	5.02672e-12
TTLL1	22q13.2	-0.353501	4.90872e-12
MTMR3	22q12.2	-0.353529	4.88811e-12
SAPCD2	9q34.3	-0.353712	4.75865e-12
CLSTN1	1p36.22	-0.353814	4.68753e-12
MIER2	19p13.3	-0.353839	4.66978e-12
PARPBP	12q23.2	-0.353846	4.66535e-12
GTSE1	22q13.31	-0.353911	4.62095e-12
KIFC1	6p21.32	-0.353971	4.57974e-12
STK35	20p13	-0.354047	4.52857e-12
ANKFN1	17q22	-0.35422	4.41475e-12
PSRC1	1p13.3	-0.354321	4.34918e-12
UCN2	3p21.31	-0.354379	4.31241e-12
SLC39A1	1q21.3	-0.354441	4.27297e-12
RRP15	1q41	-0.354443	4.27151e-12
TRIM54	2p23.3	-0.354455	4.26376e-12
TMEM51	1p36.21	-0.354503	4.23383e-12
GMPS	3q25.31	-0.354571	4.19122e-12
KIF5B	10p11.22	-0.354627	4.15692e-12
FHL3	1p34.3	-0.354658	4.13782e-12
TSPAN5	4q23	-0.354663	4.13486e-12
C1ORF131	1q42.2	-0.354874	4.00745e-12
KIF15	3p21.31	-0.354936	3.97099e-12
FAM3B	21q22.3	-0.354995	3.93643e-12
CCR3	3p21.31	-0.355067	3.89487e-12
KHSRP	19p13.3	-0.355096	3.87785e-12
TTK	6q14.1	-0.355169	3.8361e-12
MMP10	11q22.2	-0.355458	3.6754e-12
UTP20	12q23.2	-0.355726	3.53207e-12
WDHD1	14q22.2-q22.3	-0.355792	3.49762e-12
UHRF1BP1	6p21.31	-0.355806	3.49036e-12
KAT2A	17q21.2	-0.355944	3.41946e-12
FNBP1L	1p22.1	-0.356126	3.32814e-12
TGS1	8q12.1	-0.356188	3.29778e-12
CIP2A	3q13.13	-0.356224	3.28011e-12
STK17A	7p13	-0.356396	3.19731e-12
ZNF385A	12q13.13	-0.356448	3.17268e-12
USP36	17q25.3	-0.356488	3.15354e-12
DARS	2q21.3	-0.356618	3.09336e-12
ADNP	20q13.13	-0.356631	3.08709e-12
FAAP24	19q13.11	-0.356644	3.08106e-12
TNFRSF19	13q12.12	-0.357044	2.90283e-12
MELK	9p13.2	-0.357197	2.83751e-12
ZNF234	19q13.31	-0.357342	2.77671e-12
WAC	10p12.1|10p12.1-p11.2	-0.357399	2.75303e-12
MAU2	19p13.11	-0.357618	2.66454e-12
ECT2	3q26.31	-0.357628	2.66045e-12
KANSL1	17q21.31	-0.357697	2.63297e-12
ZDHHC7	16q24.1	-0.357864	2.56804e-12
PPP1R2	3q29	-0.357879	2.56242e-12
DNAAF5	7p22.3	-0.357954	2.53388e-12
SF3B3	16q22.1	-0.357995	2.51841e-12
PLAGL2	20q11.21	-0.358062	2.49314e-12
C4ORF46	4q32.1	-0.358065	2.49218e-12
PRKCD	3p21.1	-0.35807	2.49026e-12
CDK16	Xp11.3	-0.358115	2.47353e-12
KIF11	10q23.33	-0.358162	2.45625e-12
TSEN2	3p25.2	-0.358164	2.4554e-12
HSF2	6q22.31	-0.358173	2.452e-12
ATAT1	6p21.33	-0.35844	2.35602e-12
RBM14	11q13.2	-0.358464	2.34731e-12
RPGRIP1L	16q12.2	-0.358529	2.32461e-12
CCNF	16p13.3	-0.358831	2.22173e-12
INTS4	11q14.1	-0.35884	2.21855e-12
TMCC1	3q22.1	-0.359105	2.13218e-12
ACVR1	2q24.1	-0.359133	2.12329e-12
ZNF646	16p11.2	-0.359283	2.07589e-12
PRPF4B	6p25.2	-0.359296	2.0718e-12
FANCD2	3p25.3	-0.359453	2.02348e-12
SF3B4	1q21.2	-0.35998	1.8691e-12
HILPDA	7q32.1	-0.36009	1.83826e-12
PAFAH1B3	19q13.2	-0.360205	1.80674e-12
RPL13P5	12p13.31	-0.360242	1.79674e-12
DVL3	3q27.1	-0.360311	1.77808e-12
WDR75	2q32.2	-0.360575	1.70857e-12
PYGB	20p11.21	-0.360615	1.69837e-12
EDC3	15q24.1	-0.360732	1.66861e-12
ATP1B3	3q23	-0.360802	1.65099e-12
ERCC6L	Xq13.1	-0.360981	1.60678e-12
PNCK	Xq28	-0.36107	1.58533e-12
CDT1	16q24.3	-0.361218	1.5502e-12
PPP1CC	12q24.11	-0.361546	1.4752e-12
DYNC1I1	7q21.3	-0.361568	1.47021e-12
LOC728743	7q36.1	-0.361777	1.42427e-12
MPZL1	1q24.2	-0.361846	1.40945e-12
TNFRSF9	1p36.23	-0.361998	1.37737e-12
RGS9BP	19q13.11	-0.362014	1.37409e-12
TOMM20	1q42.3	-0.362182	1.33943e-12
NAT10	11p13	-0.362302	1.31532e-12
DRAM1	12q23.2	-0.3625	1.27626e-12
MSL1	17q21.1	-0.362507	1.27486e-12
DBF4B	17q21.31|17q21	-0.362553	1.26606e-12
ZNF605	12q24.33	-0.362702	1.23758e-12
SSB	2q31.1	-0.362755	1.22762e-12
BCL9L	11q23.3	-0.362937	1.1942e-12
EXO1	1q43	-0.363319	1.12667e-12
FAM222B	17q11.2	-0.363413	1.11057e-12
CWC27	5q12.3	-0.363602	1.07899e-12
THUMPD2	2p22.1|2p22-p21	-0.363617	1.07649e-12
PFAS	17p13.1	-0.363821	1.04356e-12
TRMT6	20p12.3	-0.363953	1.02273e-12
C11ORF49	11p11.2	-0.363969	1.0202e-12
SAE1	19q13.32	-0.364091	1.00141e-12
AACS	12q24.31	-0.364202	9.84533e-13
ARMC9	2q37.1	-0.364364	9.6031e-13
NFAT5	16q22.1	-0.364436	9.4982e-13
MARCKS	6q21	-0.364494	9.41441e-13
MED20	6p21.1	-0.364743	9.06176e-13
STRN4	19q13.32	-0.364823	8.95204e-13
FAM104A	17q25.1	-0.364899	8.84851e-13
PABPC4	1p34.3	-0.364957	8.76998e-13
MYBL2	20q13.12	-0.365001	8.71068e-13
FXR1	3q26.33	-0.36508	8.60614e-13
DUSP22	6p25.3	-0.365101	8.57833e-13
GPATCH2	1q41	-0.365259	8.37224e-13
LPCAT1	5p15.33	-0.365389	8.20723e-13
ZFC3H1	12q21.1	-0.365439	8.14477e-13
DNM1	9q34.11	-0.365895	7.5934e-13
KIAA0753	17p13.1	-0.366179	7.26805e-13
BMF	15q15.1	-0.366274	7.16285e-13
SUCO	1q24.3	-0.366314	7.11853e-13
ARHGAP12	10p11.22	-0.366332	7.09842e-13
PHACTR1	6p24.1	-0.366352	7.07652e-13
TRIM45	1p13.1	-0.366426	6.99695e-13
CDK5R2	2q35	-0.366505	6.91185e-13
ATXN2L	16p11.2	-0.366542	6.87297e-13
BIK	22q13.2	-0.366974	6.42904e-13
MRE11	11q21	-0.367059	6.34509e-13
YAP1	11q22.1	-0.367418	6.00274e-13
YWHAZ	8q22.3	-0.367739	5.71182e-13
CKAP5	11p11.2	-0.367769	5.68571e-13
STK39	2q24.3	-0.367793	5.66469e-13
PPEF1	Xp22.13	-0.367864	5.60249e-13
ZNRF3	22q12.1	-0.368192	5.32463e-13
STRIP1	1p13.3	-0.368263	5.26653e-13
DENND4B	1q21.3	-0.368296	5.23949e-13
MAML1	5q35.3	-0.368308	5.22988e-13
KHDRBS1	1p35.2	-0.368345	5.19991e-13
BTN2A1	6p22.2	-0.368349	5.197e-13
MDC1	6p21.33	-0.368513	5.06589e-13
FAM220A	7p22.1	-0.368514	5.06488e-13
VPS72	1q21.3	-0.368693	4.92619e-13
MATR3	5q31.2	-0.368794	4.84961e-13
MCM8	20p12.3	-0.368835	4.81888e-13
ZNF92	7q11.21	-0.369091	4.63068e-13
SLC39A10	2q32.3	-0.3692	4.55313e-13
TUBB	6p21.33	-0.369351	4.447e-13
TNFRSF21	6p12.3	-0.369545	4.31484e-13
KIF23	15q23	-0.369999	4.01993e-13
TAF8	6p21.1	-0.37012	3.94463e-13
DLX3	17q21.33	-0.370168	3.91484e-13
KIF20A	5q31.2	-0.370209	3.89034e-13
GOLGA3	12q24.33	-0.370213	3.88753e-13
ZNF687	1q21.3	-0.370355	3.80256e-13
GTPBP4	10p15.3	-0.370513	3.7097e-13
ARF3	12q13.12	-0.370965	3.45644e-13
NAA40	11q13.1	-0.371474	3.19115e-13
GOLGA7B	10q24.2	-0.371523	3.16698e-13
ANP32E	1q21.2	-0.371647	3.10594e-13
DDN	12q13.12	-0.371739	3.06114e-13
AGBL5	2p23.3	-0.371901	2.98463e-13
INCENP	11q12.3	-0.371926	2.9726e-13
TRIM16	17p12	-0.372147	2.87126e-13
EFTUD2	17q21.31	-0.372371	2.77162e-13
CCT2	12q15	-0.372503	2.71477e-13
ZNF283	19q13.31	-0.372754	2.60963e-13
LARP4B	10p15.3	-0.372885	2.55645e-13
ETV4	17q21.31	-0.372983	2.51722e-13
DLGAP5	14q22.3	-0.372999	2.51063e-13
UBTF	17q21.31	-0.373201	2.43182e-13
ERCC3	2q14.3	-0.373341	2.3788e-13
PLXNA3	Xq28	-0.373378	2.36503e-13
LRRC36	16q22.1	-0.373792	2.21522e-13
TNRC18	7p22.1	-0.373836	2.19978e-13
ZBTB45	19q13.43	-0.373853	2.19406e-13
ENAH	1q42.12	-0.373872	2.18729e-13
AGPS	2q31.2	-0.373878	2.18542e-13
NUP107	12q15	-0.374156	2.09138e-13
CCDC138	2q13	-0.374337	2.03205e-13
SENP1	12q13.11	-0.374363	2.02372e-13
CEP89	19q13.11	-0.37439	2.01499e-13
NCL	2q37.1	-0.374487	1.98451e-13
NEK2	1q32.3	-0.374501	1.97998e-13
CUEDC1	17q22	-0.374738	1.90706e-13
PHF20	20q11.22-q11.23	-0.374761	1.90007e-13
SAMD1	19p13.12	-0.374788	1.89187e-13
HNRNPUL1	19q13.2	-0.375054	1.81373e-13
ACIN1	14q11.2	-0.375225	1.76512e-13
PIAS1	15q23	-0.375238	1.7613e-13
BMS1	10q11.21	-0.37534	1.733e-13
UCK2	1q24.1	-0.375406	1.71489e-13
E2F4	16q22.1	-0.375591	1.66532e-13
CIZ1	9q34.11	-0.375642	1.65195e-13
EDC4	16q22.1	-0.375736	1.62718e-13
RBM12B	8q22.1	-0.375753	1.62292e-13
SYNGR1	22q13.1	-0.375802	1.61021e-13
HEATR6	17q23.1	-0.376085	1.53919e-13
PPRC1	10q24.32	-0.376181	1.51595e-13
AP4M1	7q22.1	-0.376469	1.44775e-13
RNF144A	2p25.1	-0.376557	1.42774e-13
BTF3L4	1p32.3	-0.376592	1.41962e-13
NOP56	20p13	-0.376665	1.40321e-13
MAD2L1	4q27	-0.376699	1.39568e-13
DLX4	17q21.33	-0.377021	1.32559e-13
DHX34	19q13.32	-0.377757	1.1783e-13
GPRIN1	5q35.2	-0.377889	1.15358e-13
KCTD7	7q11.21	-0.377994	1.13442e-13
SRARP	1p36.13	-0.378019	1.12987e-13
CST1	20p11.21	-0.378245	1.08961e-13
CYTH2	19q13.33	-0.378496	1.04643e-13
PSME3	17q21.31	-0.3785	1.04583e-13
TSR1	17p13.3	-0.378712	1.01088e-13
NONO	Xq13.1	-0.378718	1.00987e-13
CEP295	11q21	-0.379237	9.28926e-14
TESMIN	11q13.3	-0.379315	9.17296e-14
NAT8L	4p16.3	-0.379514	8.88374e-14
QSER1	11p13	-0.379596	8.76609e-14
MORC2	22q12.2	-0.380009	8.20062e-14
KIF2A	5q12.1	-0.380321	7.798e-14
UBR5	8q22.3	-0.380419	7.67506e-14
MFSD10	4p16.3	-0.380512	7.5603e-14
POLD1	19q13.33	-0.380671	7.36796e-14
ARHGEF11	1q23.1	-0.380773	7.24816e-14
IST1	16q22.2	-0.38083	7.18131e-14
CORO1C	12q24.11	-0.380876	7.12824e-14
HNRNPA2B1	7p15.2	-0.38089	7.11192e-14
HNRNPR	1p36.12	-0.38099	6.99753e-14
CDYL	6p25.1	-0.381046	6.93388e-14
KIF2C	1p34.1	-0.381237	6.72259e-14
BAK1	6p21.31	-0.381335	6.6163e-14
RBM12	20q11.22	-0.381511	6.42976e-14
SLC6A10P	16p11.2	-0.381551	6.38844e-14
SOCS7	17q12	-0.382011	5.9287e-14
PRR12	19q13.33	-0.382017	5.92275e-14
WDR12	2q33.2	-0.382391	5.57276e-14
ZCCHC12	Xq24	-0.38241	5.55571e-14
RERE	1p36.23	-0.382515	5.46181e-14
ATIC	2q35	-0.382538	5.44102e-14
MID1IP1	Xp11.4	-0.382558	5.42349e-14
ADNP2	18q23	-0.382584	5.40035e-14
PRIM2	6p11.2	-0.382597	5.38881e-14
TRIM67	1q42.2	-0.382771	5.23808e-14
CDCA4	14q32.33	-0.382819	5.1977e-14
CDC123	10p14-p13	-0.383023	5.02717e-14
PGC	6p21.1	-0.383748	4.46559e-14
SART3	12q23.3	-0.383768	4.45126e-14
NFXL1	4p12	-0.383804	4.42485e-14
HDAC4	2q37.3	-0.383937	4.32921e-14
USP54	10q22.2	-0.384055	4.24668e-14
SGO2	2q33.1	-0.384491	3.9538e-14
TPD52L2	20q13.33	-0.384533	3.92686e-14
AXIN2	17q24.1	-0.38489	3.70334e-14
SH3BP5L	1q44	-0.385016	3.62728e-14
MSI2	17q22	-0.385044	3.61061e-14
KIF18A	11p14.1	-0.385126	3.56211e-14
ZNF473	19q13.33	-0.38519	3.52484e-14
MYEF2	15q21.1	-0.385539	3.32816e-14
CEP170	1q43	-0.385726	3.22703e-14
NSD2	4p16.3	-0.385785	3.19633e-14
RPA1	17p13.3	-0.386015	3.07701e-14
THADA	2p21	-0.386103	3.03309e-14
DKC1	Xq28	-0.386152	3.00835e-14
HDAC2	6q21	-0.386181	2.99409e-14
DCAF7	17q23.3	-0.386198	2.98584e-14
FAM217B	20q13.33	-0.386201	2.98443e-14
KIAA1522	1p35.1	-0.38633	2.92153e-14
EWSR1	22q12.2	-0.386621	2.78437e-14
B4GALT3	1q23.3	-0.38672	2.73929e-14
RHBDF2	17q25.1	-0.387386	2.45307e-14
DEPDC1B	5q12.1	-0.387795	2.29227e-14
STARD3NL	7p14.1	-0.387883	2.25935e-14
CA9	9p13.3	-0.38806	2.19394e-14
TJAP1	6p21.1	-0.388187	2.14786e-14
SLC7A6OS	16q22.1	-0.388218	2.13714e-14
PRKAA2	1p32.2	-0.388248	2.12621e-14
NCOA5	20q13.12	-0.388256	2.1235e-14
ANLN	7p14.2	-0.388336	2.09563e-14
POLA1	Xp22.11-p21.3	-0.388421	2.06592e-14
NKPD1	19q13.32	-0.388719	1.96619e-14
TCERG1	5q32	-0.389136	1.83419e-14
HASPIN	17p13.2	-0.389321	1.77868e-14
MCM3	6p12.2	-0.389336	1.77401e-14
GTPBP2	6p21.1	-0.389385	1.75976e-14
SPATA17	1q41	-0.389453	1.73987e-14
TICRR	15q26.1	-0.389605	1.69614e-14
SMARCA4	19p13.2	-0.389608	1.69527e-14
PI4KB	1q21.3	-0.389844	1.6298e-14
AP2B1	17q12	-0.389987	1.59152e-14
TRIP13	5p15.33	-0.390076	1.56802e-14
MED28	4p15.32	-0.390173	1.54274e-14
MNT	17p13.3	-0.390625	1.43036e-14
ZNF623	8q24.3	-0.39089	1.36825e-14
LMNB2	19p13.3	-0.391251	1.28765e-14
KDM3A	2p11.2	-0.391418	1.25207e-14
CSNK1D	17q25.3	-0.391826	1.1692e-14
PLK1	16p12.2	-0.392112	1.11417e-14
ACTL6A	3q26.33	-0.392539	1.03689e-14
NPM3	10q24.32	-0.392642	1.01912e-14
USP39	2p11.2	-0.392694	1.01012e-14
TAF1A	1q41	-0.392831	9.87089e-15
RNPS1	16p13.3	-0.392831	9.86986e-15
RNF214	11q23.3	-0.392918	9.72652e-15
CD3EAP	19q13.32	-0.392999	9.59522e-15
TPR	1q31.1	-0.39338	8.99594e-15
CEP55	10q23.33	-0.393855	8.30221e-15
CENPF	1q41	-0.393976	8.13289e-15
MED22	9q34.2	-0.394317	7.67672e-15
MTHFD1L	6q25.1	-0.394358	7.62298e-15
IGDCC3	15q22.31	-0.394799	7.07341e-15
TOX3	16q12.1	-0.394824	7.04311e-15
IPW	15q11.2	-0.394825	7.04187e-15
PBX2	6p21.32	-0.394979	6.86079e-15
PTPN23	3p21.31	-0.395043	6.7859e-15
ABL2	1q25.2	-0.395431	6.35256e-15
NRBP1	2p23.3	-0.395531	6.24552e-15
RNF145	5q33.3	-0.395561	6.21359e-15
ACLY	17q21.2	-0.396026	5.73983e-15
JRK	8q24.3	-0.396384	5.39979e-15
UBAP2	9p13.3	-0.396456	5.334e-15
CSE1L	20q13.13	-0.396542	5.25605e-15
FAM117B	2q33.2	-0.396683	5.13069e-15
RALY	20q11.22	-0.396707	5.10954e-15
ZMYM3	Xq13.1	-0.397012	4.84974e-15
DPF2	11q13.1	-0.397351	4.57681e-15
KDM5B	1q32.1	-0.397418	4.52386e-15
LBR	1q42.12	-0.397484	4.47328e-15
MCM6	2q21.3	-0.397503	4.45891e-15
ZNF142	2q35	-0.397696	4.31324e-15
SLC26A11	17q25.3	-0.397768	4.26046e-15
PKM	15q23	-0.397918	4.15238e-15
GOLGA2P7	15q25.2	-0.397938	4.13829e-15
HPS4	22q12.1	-0.397987	4.10371e-15
NUDT17	1q21.1	-0.398015	4.084e-15
BUB1	2q13	-0.398221	3.94163e-15
GRK3	22q12.1	-0.398229	3.93606e-15
ASAP1	8q24.21-q24.22	-0.398349	3.85567e-15
DHX57	2p22.1	-0.398673	3.64703e-15
PUS7	7q22.3	-0.398694	3.63398e-15
SOX4	6p22.3	-0.398933	3.48718e-15
TSN	2q14.3	-0.399081	3.39943e-15
DHX37	12q24.31	-0.399316	3.26453e-15
SLC7A11	4q28.3	-0.399371	3.2336e-15
FERMT1	20p12.3	-0.399545	3.13804e-15
SLF2	10q24.31	-0.400118	2.84199e-15
POGK	1q24.1	-0.400144	2.82925e-15
PTBP1	19p13.3	-0.400212	2.79621e-15
MSH5	6p21.33	-0.400432	2.6919e-15
SLC6A9	1p34.1	-0.400571	2.62769e-15
ODAM	4q13.3	-0.400591	2.61855e-15
DNAJC10	2q32.1	-0.400747	2.54891e-15
EIF4ENIF1	22q12.2	-0.400954	2.45891e-15
SFPQ	1p34.3	-0.401112	2.39245e-15
KDM3B	5q31.2	-0.401393	2.27848e-15
RFWD3	16q23.1	-0.401809	2.11948e-15
ADAM9	8p11.22	-0.401843	2.10718e-15
CSPP1	8q13.1-q13.2	-0.401861	2.1005e-15
GPD2	2q24.1	-0.402114	2.00989e-15
SMARCD1	12q13.12	-0.402325	1.93739e-15
TONSL	8q24.3	-0.402667	1.82538e-15
LINC00205	21q22.3	-0.40288	1.75862e-15
MEX3A	1q22	-0.403336	1.62394e-15
BUB1B	15q15.1	-0.403374	1.61331e-15
MTBP	8q24.12	-0.403762	1.50752e-15
YEATS2	3q27.1	-0.403994	1.44748e-15
PHIP	6q14.1	-0.404107	1.41906e-15
RNF24	20p13	-0.404225	1.39005e-15
INPP5J	22q12.2	-0.404347	1.36041e-15
FRAS1	4q21.21	-0.404408	1.34593e-15
RIT1	1q22	-0.404437	1.33913e-15
COLCA2	11q23.1	-0.404625	1.29577e-15
ANAPC1	2q13	-0.404892	1.23628e-15
NDRG3	20q11.23	-0.404974	1.21875e-15
FUBP1	1p31.1	-0.404988	1.21555e-15
TULP3	12p13.33	-0.40501	1.21105e-15
TCTN2	12q24.31	-0.4053	1.15074e-15
JADE2	5q31.1	-0.405559	1.09934e-15
UBE2I	16p13.3	-0.405584	1.09462e-15
TMEM201	1p36.22	-0.406297	9.65257e-16
CNOT3	19q13.42	-0.406411	9.46034e-16
HNRNPA1L2	13q14.3	-0.406474	9.35474e-16
ROR1	1p31.3	-0.406689	9.00617e-16
SMURF2	17q23.3-q24.1	-0.407123	8.341e-16
MARCKSL1	1p35.1	-0.407124	8.33986e-16
ZBTB40	1p36.12	-0.4072	8.22817e-16
DNASE1	16p13.3	-0.407475	7.83614e-16
FMNL2	2q23.3	-0.407492	7.81224e-16
KANSL2	12q13.11	-0.407787	7.41391e-16
DNAJB13	11q13.4	-0.407838	7.3477e-16
CDK4	12q14.1	-0.408591	6.42762e-16
LZTS2	10q24.31	-0.408832	6.15739e-16
BRD9	5p15.33	-0.409203	5.76329e-16
NCAPH	2q11.2	-0.409699	5.27466e-16
TPM3	1q21.3	-0.409742	5.23434e-16
DSTYK	1q32.1	-0.409743	5.2341e-16
NPM1	5q35.1	-0.40975	5.22713e-16
CCAR1	10q21.3	-0.409876	5.11073e-16
ZNF143	11p15.4	-0.409976	5.02011e-16
HSP90AB1	6p21.1	-0.4102	4.82341e-16
U2SURP	3q23	-0.410273	4.76055e-16
RHNO1	12p13.33	-0.411361	3.91707e-16
TRIM11	1q42.13	-0.411687	3.69408e-16
TYRO3	15q15.1	-0.41182	3.60695e-16
CACNB4	2q23.3	-0.411977	3.5062e-16
TARBP1	1q42.2	-0.412109	3.42359e-16
FOXK1	7p22.1	-0.41225	3.33793e-16
TMEM67	8q22.1	-0.412256	3.33467e-16
TLCD5	11q23.3	-0.412452	3.21887e-16
NFE2L3	7p15.2	-0.412537	3.16978e-16
CHKA	11q13.2	-0.412983	2.92466e-16
VEZF1	17q22	-0.413354	2.73494e-16
CEP250	20q11.22	-0.413381	2.72186e-16
NKAIN1	1p35.2	-0.413427	2.69901e-16
DCAF16	4p15.31	-0.41363	2.60162e-16
CD2AP	6p12.3	-0.413676	2.58008e-16
MSH2	2p21-p16.3	-0.413945	2.45746e-16
MAPRE1	20q11.21	-0.413962	2.45014e-16
PITX1	5q31.1	-0.414851	2.08496e-16
SOX12	20p13	-0.415103	1.99149e-16
MED12	Xq13.1	-0.415221	1.94927e-16
RIOK1	6p24.3	-0.415551	1.83561e-16
USH1C	11p15.1	-0.415702	1.78587e-16
KDELR1	19q13.33	-0.41589	1.72563e-16
TIGD1	2q37.1	-0.416211	1.62762e-16
NCAPD2	12p13.31	-0.416608	1.51352e-16
RCC2	1p36.13	-0.41714	1.37313e-16
ZNF74	22q11.21	-0.41723	1.35084e-16
KPNB1	17q21.32	-0.417306	1.33219e-16
USP21	1q23.3	-0.417654	1.24975e-16
E2F6	2p25.1	-0.417706	1.238e-16
ZNF282	7q36.1	-0.417905	1.19359e-16
NKX3-2	4p15.33	-0.418989	9.7784e-17
LIN9	1q42.12	-0.419114	9.55598e-17
EFNA4	1q21.3	-0.41924	9.3365e-17
TFAP4	16p13.3	-0.41936	9.13149e-17
HNRNPL	19q13.2	-0.41946	8.96404e-17
NUP37	12q23.2	-0.41994	8.20444e-17
FAM53C	5q31.2	-0.420957	6.79566e-17
MAFG-DT	17q25.3	-0.421028	6.70709e-17
TTC27	2p22.3	-0.42168	5.94164e-17
NPEPPS	17q21.32	-0.421738	5.87805e-17
CASC3	17q21.1	-0.422524	5.07852e-17
EEF1E1	6p24.3	-0.423197	4.47896e-17
ABCC10	6p21.1	-0.423205	4.47164e-17
LEF1	4q25	-0.423323	4.37427e-17
RUNDC1	17q21.31	-0.424933	3.23483e-17
NUAK2	1q32.1	-0.425046	3.16668e-17
VPS54	2p15-p14	-0.425695	2.80302e-17
HIF1AN	10q24.31	-0.426069	2.61195e-17
NFYA	6p21.1	-0.426161	2.56722e-17
NVL	1q42.11	-0.426475	2.41924e-17
ZNF207	17q11.2	-0.426996	2.19254e-17
NAP1L1	12q21.2	-0.42725	2.08956e-17
DNAH14	1q42.12	-0.428637	1.60577e-17
CSNK2A1	20p13	-0.428691	1.58943e-17
PIP4K2B	17q12	-0.429518	1.35772e-17
SNHG4	5q31.2	-0.430192	1.19372e-17
INTS8	8q22.1	-0.430381	1.15132e-17
ZMYND8	20q13.12	-0.430839	1.05458e-17
CHEK1	11q24.2	-0.431732	8.88375e-18
TAF6	7q22.1	-0.432071	8.32303e-18
RHOBTB1	10q21.2	-0.432533	7.61533e-18
GTF3C2	2p23.3	-0.433017	6.9358e-18
ARL6IP6	2q23.3	-0.433219	6.67138e-18
CNOT11	2q11.2	-0.433933	5.81111e-18
RNMT	18p11.21	-0.434325	5.38613e-18
TRIM65	17q25.1	-0.434357	5.35239e-18
STX6	1q25.3	-0.435571	4.22778e-18
TTLL4	2q35	-0.436101	3.8129e-18
CBFB	16q22.1	-0.436386	3.60704e-18
SETDB1	1q21.3	-0.437169	3.09491e-18
ILF2	1q21.3	-0.43724	3.0522e-18
CANT1	17q25.3	-0.437256	3.04269e-18
LDB1	10q24.32	-0.437913	2.67515e-18
MED15	22q11.21	-0.43886	2.22091e-18
CLIC1	6p21.33	-0.440321	1.66488e-18
ATXN7L3	17q21.31	-0.440327	1.66277e-18
MMS19	10q24.1	-0.440696	1.54558e-18
EPRS	1q41	-0.440926	1.47683e-18
CDK5R1	17q11.2	-0.441649	1.27949e-18
BAMBI	10p12.1	-0.442086	1.17305e-18
PARD3	10p11.22-p11.21	-0.442299	1.12432e-18
RAD54B	8q22.1	-0.44244	1.09315e-18
MATN3	2p24.1	-0.442796	1.01829e-18
ZBTB12	6p21.33	-0.443343	9.13026e-19
BEND3	6q21	-0.443929	8.12099e-19
HCFC1	Xq28	-0.444021	7.97351e-19
NUP93	16q13	-0.445346	6.11244e-19
TP53BP1	15q15.3	-0.44573	5.6574e-19
RNF216	7p22.1	-0.446399	4.94406e-19
SMAD3	15q22.33	-0.446503	4.84122e-19
UBE2O	17q25.1	-0.446812	4.54846e-19
CBX1	17q21.32	-0.446856	4.50845e-19
LIMK1	7q11.23	-0.446896	4.47202e-19
EPS8L3	1p13.3	-0.447789	3.7321e-19
PRRC2A	6p21.33	-0.448057	3.53499e-19
SLC6A8	Xq28	-0.448968	2.93736e-19
UBA2	19q13.11	-0.449046	2.89115e-19
TBC1D3	17q12	-0.449583	2.59154e-19
HSDL1	16q24.1	-0.449752	2.50388e-19
ITGA2	5q11.2	-0.450761	2.03726e-19
SMARCAL1	2q35	-0.451099	1.90102e-19
C1ORF112	1q24.2	-0.451894	1.61498e-19
GTF2IRD1	7q11.23	-0.453892	1.06988e-19
TRIM28	19q13.43	-0.455116	8.30237e-20
CPSF6	12q15	-0.455755	7.26913e-20
UBE2Z	17q21.32	-0.457031	5.57132e-20
XPO5	6p21.1	-0.457383	5.17619e-20
DROSHA	5p13.3	-0.458407	4.17599e-20
TBX4	17q23.2	-0.458897	3.76741e-20
PYGO2	1q21.3	-0.458964	3.71472e-20
FAM189B	1q22	-0.459892	3.05528e-20
RBMX	Xq26.3	-0.46003	2.96802e-20
WIF1	12q14.3	-0.460381	2.75599e-20
G6PD	Xq28	-0.460612	2.62467e-20
ASXL1	20q11.21	-0.46086	2.49057e-20
BZW2	7p21.1	-0.460962	2.43733e-20
CAMSAP2	1q32.1	-0.461291	2.27343e-20
PHF21A	11p11.2	-0.462548	1.74088e-20
CNOT6	5q35.3	-0.462625	1.71235e-20
CCDC93	2q14.1	-0.462657	1.70067e-20
HCG18	6p22.1	-0.462715	1.67985e-20
EPHB2	1p36.12	-0.463089	1.55116e-20
FBXL19	16p11.2	-0.463135	1.53627e-20
SLC39A6	18q12.2	-0.464616	1.11934e-20
MAFG	17q25.3	-0.464647	1.11202e-20
SMPD4	2q21.1	-0.468499	4.84634e-21
MPP3	17q21.31	-0.468544	4.79882e-21
NRF1	7q32.2	-0.470691	3.00713e-21
CCDC97	19q13.2	-0.47274	1.91851e-21
SMYD5	2p13.2	-0.472908	1.84889e-21
ANKRD52	12q13.3	-0.473592	1.5903e-21
RACGAP1	12q13.12	-0.474095	1.42301e-21
GGA3	17q25.1	-0.474286	1.3643e-21
DNMT3A	2p23.3	-0.474804	1.21652e-21
NELFA	4p16.3	-0.474828	1.21003e-21
MTA3	2p21	-0.476445	8.44907e-22
U2AF2	19q13.42	-0.478036	5.92337e-22
NUP62	19q13.33	-0.478826	4.96161e-22
ILF3	19p13.2	-0.481548	2.68595e-22
SMARCC1	3p21.31	-0.482656	2.08891e-22
ANKRD27	19q13.11	-0.483359	1.77992e-22
ZSWIM5	1p34.1	-0.485251	1.15518e-22
DHX9	1q25.3	-0.486077	9.55687e-23
CS	12q13.3	-0.486427	8.81812e-23
MLLT6	17q12	-0.487982	6.15975e-23
HEATR1	1q43	-0.489077	4.77915e-23
ARHGAP39	8q24.3	-0.489099	4.75521e-23
RNF44	5q35.2	-0.49372	1.61323e-23
CBX3	7p15.2	-0.495403	1.0838e-23
SINHCAF	12p11.21	-0.496297	8.76521e-24
PLXNA1	3q21.3	-0.497967	5.88646e-24
DLG5	10q22.3	-0.500107	3.52361e-24
CAD	2p23.3	-0.500676	3.07206e-24
HNRNPU	1q44	-0.501405	2.5763e-24
TCOF1	5q32-q33.1	-0.504637	1.17454e-24
PPFIA4	1q32.1	-0.505832	8.76571e-25
ASIC1	12q13.12	-0.507131	6.36949e-25
SPATS2	12q13.12	-0.511282	2.2747e-25
COPS7B	2q37.1	-0.513969	1.15953e-25
TEAD2	19q13.33	-0.514444	1.02849e-25
EHMT2	6p21.33	-0.515029	8.87229e-26
LAMC1	1q25.3	-0.520972	1.94542e-26
FAM49B	8q24.21	-0.522085	1.45941e-26
JARID2	6p22.3	-0.524724	7.34843e-27
SRC	20q11.23	-0.528295	2.8763e-27
HMGA1	6p21.31	-0.531399	1.26126e-27
SLC7A6	16q22.1	-0.532622	9.09466e-28
DVL2	17p13.1	-0.533879	6.48922e-28
UBAP2L	1q21.3	-0.550456	6.60266e-30
TCF3	19p13.3	-0.567839	4.05064e-32

## Sheet: Venn Diagram
Supplementary Table 5. Genes correlated to ALDOA and FBP1 expression of LIHC in the TCGA (Firehose Legacy dataset).
Overlapped Gene
PNCK
AACS
PNMA1
TKT
SLC7A6
BRIX1
DTNBP1
CCNB1
BAK1
LHFPL2
SHC1
LMNB2
KPNA2
SLC6A10P
TRAF5
BIRC5
ARHGAP39
STK17A
NAT8L
TPM3
DNM1
PLXNA1
TONSL
ORC1
SH2B2
RAB35
NPM1
PACC1
NCDN
MAPRE1
DLGAP4
FAAP24
PSMC3IP
DYNC1H1
WDR62
SAPCD2
CCR3
CIP2A
FUBP1
MAD2L1
YWHAZ
AURKB
CEP131
KCTD10
PITX1
PAFAH1B3
FHDC1
ASAP1
AP4M1
KIF4A
EPS8L3
CORO1C
SPP1
CA9
ENO2
KMT5A
MCM10
CLIP2
KDELR1
E2F4
TRAIP
CDK4
PRMT1
CDK16
DRP2
SLC7A11
TMEM132A
PSRC1
CLIC1
FAM104A
MMP1
CBX2
MMP12
CDCA5
TRIM16
PIFO
UBE2T
SLC2A1
STK39
GOLGA2P7
NAP1L1
FBRS
DNAJB13
SOGA1
NKAIN1
U2AF2
MTFR2
XPO6
ZDHHC7
PCLAF
PYGB
TACC3
ATP13A2
IQCE
CASC15
ARHGAP1
CDT1
GPRIN1
SMARCA4
ARMC9
LRP8
NFE2L3
CEP55
SH3D21
PLEKHB2
TRIM11
G6PD
TNFRSF21
SLC6A8
CDC45
STIP1
CCT3
MTHFD1L
PPP1R9B
IST1
TRIM28
BZW2
MPV17
POP1
RNF24
SRC
MED15
CANT1
SGSH
UBE2Z
RNPS1
MAFG
CBX3
VASP
EME1
SLC39A10
MARCKSL1
DAGLA
SLC7A1
GCNT3
C15ORF39
HILPDA
CCNF
PPM1G
ABCC1
GDF1
CNOT3
PFKFB4
DKKL1
GYG1
TLCD5
HMGXB3
SLC39A1
STX6
LIMK1
MMP10
ATXN2L
LPCAT1
ANKS3
AAK1
CTTN
CCT6A
TCOF1
CKAP4
UCK2
PLXNA3
DNASE1
RAB42
UTP4
SVBP
MAFG-DT
HOMER3
FHL3
TPD52L2
SOX4
SMARCD1
MCRS1
KIAA1522
SFPQ
ILF2
NUP93
RALY
C4ORF48
DBNDD2
PLK1
UBE2I
TEX19
MRGBP
YEATS2
CCDC137
FAM72B
CCT2
TTLL1
CENPH
SUPT5H
RNF145
CTSV
ARHGEF2
EFTUD2
CS
PRMT2
INTS8
TMEM44
PRKCD
MYBL2
SMYD5
RBM19
ENAH
RCC2
CENPO
TUBA1B
CKS1B
RCOR2
C6ORF223
TEAD2
RHNO1
GMIP
SMOX
VLDLR
FER1L4
EPRS
ETV4
STARD3NL
MPZL1
IFNGR2
KIF2C
CYTH2
DRAM1
PPP2R2C
MFSD10
CDK5R2
BLOC1S3
CENPA
DIRAS2
DHX37
CDC20
DHX34
QPCT
H2AFZ
H2AFX
TYRO3
CEP89
SPATS2
FBXL19
TRIP13
C10ORF91
RAN
C11ORF49
SPINDOC
C4ORF47
ZNF213
P3H4
DLL3
MFSD2B
MOB3A
SNHG3
LSP1P5
GIT1
CLSTN1
SHCBP1
TAF6
CBFB
TMEM51
VPS37C
MARCKS
STX1A
PIMREG
NOP56
XPNPEP1
CERS5
UBE2C
GTPBP4
SERPINB1
RALA
DDN
EEF1E1
NCBP2
MRPS23
TRIM54
PIP4P2
FANCI
SLC16A3
RAD54L
EDC4
PIGS
ASNS
TBX19
IKBKE
DBN1
PKMYT1
JPT2
GOLGA2P10
RIT1
RHBDF2
TMEM201
MTMR2
GPC2
RRP12
CYREN
SLC41A3
MPP3
CIZ1
RAD51
SLC38A1
MMD
PKM
ETV5
CACYBP
GPD2
CHAF1B
CCT5
ARF3
TLCD3A
SNRPB
ORC6
SOX11
SF3B4
SAE1
MFSD5
STRN4
LHFPL3-AS2
PPFIA4
ZNF385A
GAGE12D
DCTN5
KHDRBS1
NUP43
PVT1
MED22
LARP4B
FMNL2
HMGA1
ATIC
SLC4A11
ATP1B3
NUP62
GAD1
SH2D5
E2F3
NCAPG
SLC52A2
USH1C
NDRG3
WASF2
FAM49B
CDCA8
