# Supplementary material for: The role of fructose 1,6-bisphosphate-mediated glycolysis/gluconeogenesis genes in cancer prognosis
Source: Aging (Albany NY). 2022 Apr 11;14(7):3233–58. doi: 10.18632/aging.204010 (PMC9037270; doi:10.18632/aging.204010)
Supplement: Supplementary Table 6 [file aging-14-204010-s007.xlsx]

## Sheet: Venn Diagram
Supplementary Table 6. Genes overlapped to ALDOA and FBP1 expression of LIHC in the TCGA (PanCancer Atlas dataset and Firehose Legacy dataset).
Overlapped Gene
C4ORF47
PNCK
AACS
PNMA1
AURKB
ZNF213
DNASE1
SGSH
UBE2Z
DNAJB13
CEP131
P3H4
DLL3
TKT
RNPS1
MFSD2B
MOB3A
RCOR2
SNHG3
SLC7A6
BRIX1
SLC41A3
SOGA1
C6ORF223
GIT1
KCTD10
PITX1
PAFAH1B3
FHDC1
TEAD2
MAFG
CLSTN1
RAB42
MPP3
SVBP
UTP4
NKAIN1
CBX3
DTNBP1
VASP
CCNB1
ASAP1
CIZ1
SHCBP1
EME1
TAF6
RHNO1
U2AF2
MAFG-DT
SLC39A10
HOMER3
CBFB
FHL3
TMEM51
MTFR2
RAD51
BAK1
VPS37C
TPD52L2
MARCKSL1
MARCKS
DAGLA
GMIP
SMOX
MMD
SOX4
VLDLR
AP4M1
SLC7A1
SMARCD1
XPO6
KIF4A
PKM
MCRS1
CACYBP
ETV5
GPD2
ZDHHC7
LHFPL2
SHC1
EPS8L3
CHAF1B
STX1A
ILF2
SFPQ
KIAA1522
GCNT3
PCLAF
C15ORF39
FER1L4
PIMREG
ETV4
CORO1C
NOP56
LMNB2
HILPDA
STARD3NL
MPZL1
SPP1
PYGB
CCNF
XPNPEP1
PPM1G
KPNA2
CERS5
CA9
SLC6A10P
CCT5
IFNGR2
ARF3
RALY
NUP93
ENO2
TRAF5
TACC3
ATP13A2
C4ORF48
KIF2C
KMT5A
BIRC5
TLCD3A
DBNDD2
CYTH2
PLK1
IQCE
SNRPB
MCM10
ORC6
CASC15
DRAM1
ABCC1
ARHGAP39
UBE2C
STK17A
SOX11
PPP2R2C
CLIP2
NAT8L
ARHGAP1
UBE2I
GTPBP4
GDF1
KDELR1
SF3B4
TEX19
SAE1
MFSD10
CDK5R2
E2F4
MFSD5
TRAIP
STRN4
TPM3
BLOC1S3
SERPINB1
MRGBP
CDK4
CENPA
CNOT3
PRMT1
LHFPL3-AS2
YEATS2
DNM1
CDT1
PLXNA1
PFKFB4
CCDC137
GPRIN1
SMARCA4
PPFIA4
ARMC9
LRP8
ZNF385A
RALA
TONSL
DKKL1
NFE2L3
CEP55
GYG1
FAM72B
TLCD5
ORC1
CDK16
DHX37
SH2B2
CCT2
TTLL1
CDC20
GAGE12D
KHDRBS1
SH3D21
CENPH
RAB35
PLEKHB2
TRIM11
NUP43
EEF1E1
DDN
HMGXB3
DRP2
NPM1
SUPT5H
G6PD
PVT1
SLC39A1
SLC7A11
NCBP2
STX6
LARP4B
MED22
LIMK1
PACC1
MRPS23
FMNL2
NCDN
DHX34
HMGA1
QPCT
TRIM54
PIP4P2
H2AFZ
RNF145
FANCI
CTSV
ATIC
H2AFX
MAPRE1
MMP10
TNFRSF21
TMEM132A
ARHGEF2
RAD54L
EFTUD2
FAAP24
SLC6A8
TYRO3
SLC4A11
CDC45
ATP1B3
PSMC3IP
CS
PRMT2
NUP62
STIP1
ATXN2L
INTS8
DYNC1H1
CCT3
PIGS
EDC4
E2F3
ASNS
NCAPG
MTHFD1L
CEP89
LPCAT1
ANKS3
PPP1R9B
SPATS2
AAK1
TMEM44
SLC52A2
PSRC1
SAPCD2
WDR62
CLIC1
IKBKE
CCT6A
FBXL19
DBN1
TCOF1
PRKCD
FAM104A
PKMYT1
USH1C
MMP1
TRIP13
MYBL2
C10ORF91
CBX2
SMYD5
IST1
RBM19
ENAH
CCR3
NDRG3
JPT2
TRIM28
RCC2
MMP12
CDCA5
TRIM16
CENPO
BZW2
RAN
MPV17
UBE2T
PIFO
SLC2A1
CIP2A
POP1
RNF24
GOLGA2P10
STK39
GOLGA2P7
FAM49B
WASF2
RIT1
SRC
RHBDF2
MED15
TUBA1B
CANT1
TMEM201
MTMR2
MAD2L1
C11ORF49
CKAP4
GPC2
NAP1L1
RRP12
FBRS
UCK2
CYREN
YWHAZ
PLXNA3
CDCA8
SPINDOC
