# Supplementary material for: The role of fructose 1,6-bisphosphate-mediated glycolysis/gluconeogenesis genes in cancer prognosis
Source: Aging (Albany NY). 2022 Apr 11;14(7):3233–58. doi: 10.18632/aging.204010 (PMC9037270; doi:10.18632/aging.204010)
Supplement: Supplementary Table 9 [file aging-14-204010-s009.xlsx]

## Sheet: LIHC_ALDOA
Supplementary Table 9
Upstream regulators correlated and overlapped to ALDOA and FBP1 expression in the LIHC and LUAD.
Correlated Gene	Spearman's Correlation	p-Value
MYBL2	0.4661	3.402e-24
E2F4	0.4535	7.738e-23
HSF1	0.4515	1.254e-22
E2F2	0.4505	1.601e-22
CBX3	0.4277	3.116e-20
ZBTB17	0.4181	2.532e-19
HDAC1	0.3936	3.998e-17
TCF3	0.3718	2.621e-15
MITF	0.3551	5.175e-14
E2F3	0.3470	2.067e-13
CDKN2A	0.331	2.843e-12
SPI1	0.3218	1.206e-11
FOXM1	0.3164	2.761e-11
E2F1	0.3024	2.142e-10

## Sheet: LIHC_FBP1
Supplementary Table 9
Upstream regulators correlated and overlapped to ALDOA and FBP1 expression in the LIHC and LUAD.
Correlated Gene	Spearman's Correlation	p-Value
TCF3	-0.6366	1.997e-49
CBX3	-0.5683	1.56e-37
E2F4	-0.4915	4.176e-27
MYBL2	-0.4705	1.116e-24
FOXM1	-0.4654	4.059e-24
NFYA	-0.4366	4.174e-21
E2F2	-0.408	2.128e-18
HSF2	-0.3931	4.437e-17
E2F1	-0.3792	6.570e-16
E2F7	-0.3664	6.917e-15
GON4L	-0.3616	1.65e-14
HSF1	-0.3496	1.318e-13
E2F3	-0.3291	3.873e-12
CBX4	-0.3175	2.315e-11
BRCA1	-0.313	4.577e-11
E2F5	-0.3097	7.475e-11

## Sheet: LUAD_ALDOA
Supplementary Table 9. Upstream regulators correlated and overlapped to ALDOA and FBP1 expression in the LIHC and LUAD.
Correlated Gene	Spearman's Correlation	p-Value
MYBL2	0.5289	8.109e-43
FOXM1	0.4697	6.051e-33
CBX4	0.4639	4.509e-32
CBX3	0.4413	7.732e-29
E2F4	0.3989	2.103e-23
HSF1	0.3952	5.758e-23
E2F2	0.3902	2.175e-22
E2F1	0.3574	8.520e-19

## Sheet: LUAD_FBP1
Supplementary Table 9
Upstream regulators correlated and overlapped to ALDOA and FBP1 expression in the LIHC and LUAD.
Correlated Gene	Spearman's Correlation	p-Value
FOXM1	-0.544	1.17e-45
E2F3	-0.5171	1.063e-40
E2F7	-0.5073	5.464e-39
MYBL2	-0.5044	1.725e-38
E2F2	-0.475	9.375e-34
BRCA1	-0.4362	3.738e-28
HDAC1	-0.4229	2.197e-26
RRP1B	-0.4087	1.367e-24
RBL1	-0.3971	3.413e-23
YY1	-0.3807	2.673e-21
CBX3	-0.3736	1.633e-20
E2F1	-0.3503	4.579e-18
TCF3	-0.3135	1.342e-14
NFYA	-0.3086	3.6e-14

## Sheet: Venn Diagram
Supplementary Table 9
Upstream regulators correlated and overlapped to ALDOA and FBP1 expression in the LIHC and LUAD.
Overlapped upstream regulators
MYBL2
E2F2
CBX3
FOXM1
E2F1
